# Supplementary material for: Deconvolution of malignant pleural effusions immune landscape unravels a novel macrophage signature associated with worse clinical outcome in lung adenocarcinoma patients
Source: HighWire-hosted journal article supplement (doi:10.1136/jitc-2021-004239), 2022-05-01
Supplement: jitc-2021-004239supp005_data_supplement.xlsx [file jitc-2021-004239supp005_data_supplement.xlsx]

## Sheet: A
Table S2_Differential Expressed Genes (DEG) in LUAD PEMC vs LUAD PBMC
genes	log2FoldChange	pvalue	padj	mean_PEMC	mean_PBMC
SPP1	9.94095	5.05324e-100	9.73759e-96	15.9805	6.80892
COL1A1	10.0226	1.72065e-83	1.65785e-79	14.1059	5.84495
LYVE1	8.93336	1.47741e-82	9.48987e-79	13.2061	5.96763
TREM2	7.86058	4.8005e-78	2.31264e-74	10.2712	5.29181
PLTP	9.07311	2.95584e-76	1.13918e-72	15.0805	6.82987
COL5A1	6.86124	1.1036e-66	3.5444e-63	11.879	6.28666
COLEC12	8.60648	2.22812e-66	6.13369e-63	11.9208	5.57304
LGMN	6.39315	6.91354e-64	1.6653e-60	12.9691	7.28936
PLS3	7.05007	1.82463e-59	3.90674e-56	11.2658	5.96666
PPBP	-10.4867	6.69497e-59	1.29012e-55	5.22629	12.2435
PAPSS2	3.50654	9.16812e-59	1.60609e-55	11.9802	8.65084
CTSL	6.56567	1.83692e-58	2.94979e-55	14.983	8.57143
PTGIS	9.14878	2.67328e-57	3.96263e-54	11.0736	5.31583
NRP2	5.2847	3.33281e-57	4.58738e-54	11.3175	6.77756
ITGB4	6.34617	3.59703e-57	4.62098e-54	11.3567	6.35575
ECM1	5.13743	1.94537e-56	2.34296e-53	10.0105	6.16496
CFB	7.32657	2.28261e-54	2.5874e-51	13.8589	7.44565
SLC2A5	6.04113	2.35075e-52	2.38682e-49	9.84087	5.78535
C1S	7.61467	2.35338e-52	2.38682e-49	12.6107	6.40674
ENPP2	5.70178	3.87516e-52	3.73372e-49	12.0826	7.11768
C1R	7.2085	4.11954e-50	3.78017e-47	10.5101	5.69274
EFEMP1	11.1086	4.12384e-49	3.61211e-46	11.3074	5.00886
LOC102724852	6.95008	1.17914e-48	9.87916e-46	10.8931	5.89079
TUBA1C	2.32911	3.21386e-48	2.58046e-45	13.4287	11.1325
FABP5	3.90601	3.88681e-48	2.99595e-45	12.518	8.76729
PRG4	8.34481	4.09396e-48	3.03426e-45	15.8515	8.27871
AQP1	7.79384	1.38948e-47	9.91675e-45	10.0656	5.29604
ABI3BP	7.77996	1.49071e-47	1.02593e-44	11.328	5.81151
ETV5	6.25644	1.80189e-46	1.19733e-43	10.068	5.7254
GPNMB	8.41377	3.44157e-46	2.21064e-43	13.5679	6.203
SIGLEC1	5.25059	6.44537e-46	4.00652e-43	11.5047	7.00345
SPRED1	3.66948	1.60629e-45	9.67285e-43	12.0328	8.5217
PLAT	8.70745	7.03875e-45	3.98932e-42	9.70989	5.14306
FN1	9.39082	6.92152e-45	3.98932e-42	17.8061	8.4533
CD276	8.40304	2.40327e-44	1.32317e-41	9.15258	5.04716
SLCO2B1	8.44068	1.84397e-43	9.87036e-41	10.7408	5.31797
ATP1B1	4.7206	4.29878e-43	2.23885e-40	11.5037	7.40503
RAP1GAP2	-2.02646	4.84729e-43	2.45809e-40	9.67916	11.6465
PLXNA1	2.59059	1.62602e-42	8.03421e-40	10.7863	8.369
F3	6.05303	1.14072e-41	5.49541e-39	9.58114	5.62351
NRP1	6.45466	1.2999e-41	6.10955e-39	11.8597	6.48631
C3	8.83029	1.52459e-41	6.99499e-39	15.3752	7.29967
CYR61	8.1837	1.58023e-41	7.08165e-39	10.6172	5.45362
EPAS1	4.80732	1.65316e-41	7.24008e-39	11.3484	7.14223
CCDC80	9.63624	2.0615e-41	8.8278e-39	12.9732	5.5651
MMP14	4.32125	3.39633e-41	1.42277e-38	10.439	6.81992
FPR3	4.64511	4.47849e-41	1.83618e-38	10.347	6.55227
AXL	5.32379	7.75574e-41	3.11361e-38	9.40443	5.83356
PF4	-10.5039	1.14399e-40	4.49893e-38	4.92691	10.384
FMNL2	3.43335	3.00835e-40	1.15942e-37	11.6631	8.49973
C4B	7.51225	5.1799e-40	1.95719e-37	15.1142	8.32543
ALDH1A2	7.85437	8.19363e-40	3.03637e-37	9.64386	5.26695
GLUL	3.02683	8.5371e-40	3.10396e-37	16.108	13.1065
ADAMTS9	10.337	1.91072e-39	6.81844e-37	10.8576	5.02086
DSG2	7.4702	4.81817e-39	1.68811e-36	11.5289	6.05709
MLXIPL	8.33602	5.64415e-39	1.94219e-36	8.84683	4.93375
MID1	6.64426	6.0632e-39	2.04979e-36	8.34454	5.21154
SULF1	9.68422	1.24211e-38	4.05685e-36	9.8648	4.98105
ENG	3.17879	1.55017e-38	4.97864e-36	12.4543	9.38739
FLNC	8.77977	2.069e-38	6.53599e-36	11.3138	5.38272
CACNA2D1	10.6641	2.51887e-38	7.82881e-36	10.1322	4.87338
CA12	9.97272	2.58519e-38	7.90741e-36	10.5631	5.06201
MYH14	10.263	4.3432e-38	1.30771e-35	10.5679	5.04963
C1R-2	6.11684	5.31217e-38	1.57486e-35	10.0039	5.88858
COL1A2	9.38528	6.0103e-38	1.75482e-35	14.2429	6.05639
CTSB	3.528	6.87551e-38	1.97748e-35	15.1872	11.6549
IGFBP4	5.61794	1.01644e-37	2.8804e-35	8.8045	5.55766
SPRY2	4.53213	1.03972e-37	2.90369e-35	10.3949	6.66082
TMEM51	4.98025	2.10755e-37	5.80179e-35	8.90536	5.77427
CEACAM6	9.44976	5.60118e-37	1.52021e-34	12.4232	5.77752
ALDH1A3	9.54405	8.46773e-37	2.26629e-34	9.57066	5.00156
DCBLD2	4.7565	1.89816e-36	5.01063e-34	9.56001	6.16815
LOX	6.42554	2.03374e-36	5.29597e-34	9.71244	5.63455
ENAH	5.80715	2.29226e-36	5.88957e-34	10.5312	6.25531
TM4SF1	10.2927	2.72868e-36	6.91865e-34	11.0368	5.11022
CDH3	6.91515	4.39411e-36	1.09967e-33	9.8921	5.56671
PLAU	6.7865	1.0044e-35	2.48138e-33	8.64952	5.20765
TNFRSF21	4.62809	1.10791e-35	2.69891e-33	10.3145	6.54857
OSMR	7.33426	1.12046e-35	2.69891e-33	11.0642	5.86773
C1orf195	4.58599	1.15033e-35	2.73666e-33	7.4015	5.35112
SERPINH1	4.08216	1.23543e-35	2.90325e-33	11.187	7.64659
FAT1	9.91897	2.98427e-35	6.92853e-33	12.1314	5.43453
PVRL2	3.24288	6.7172e-35	1.52283e-32	9.83757	7.11501
TGM2	4.78786	8.49098e-35	1.90257e-32	11.1994	7.04171
TUBB3	8.45616	1.05965e-34	2.34706e-32	10.1935	5.26052
LHFPL2	3.17479	1.56878e-34	3.43528e-32	9.20997	6.72786
SPRED2	3.41775	1.86215e-34	4.03187e-32	8.27614	6.08625
EGFR	10.461	2.24534e-34	4.80752e-32	10.8001	5.07595
MET	8.44309	4.72308e-34	1.00015e-31	11.178	5.43348
WBP5	4.27598	6.48109e-34	1.35751e-31	9.41127	6.29845
CLDN1	13.0558	1.14618e-33	2.37493e-31	10.2035	4.74173
GJA1	4.78354	1.29722e-33	2.6593e-31	11.1485	7.15059
KRT18	5.04049	2.72595e-33	5.52937e-31	12.2772	7.89059
FOXC1	5.5255	3.90498e-33	7.83843e-31	9.41029	5.77658
VCAM1	6.51771	8.95156e-33	1.77832e-30	10.6681	5.87783
TJP1	9.10998	9.41883e-33	1.85205e-30	11.2324	5.43163
ANTXR1	8.58708	1.12e-32	2.18004e-30	9.4041	5.0434
MSR1	4.45575	1.28339e-32	2.47309e-30	12.6794	8.38869
MXRA5	11.1174	1.82085e-32	3.47405e-30	10.3745	4.9193
GPRC5A	8.80921	2.16684e-32	4.09363e-30	9.07433	5.01626
APOC1	9.04268	5.43823e-32	1.01742e-29	10.5135	5.14286
YAP1	6.77582	5.81758e-32	1.07793e-29	9.46823	5.53043
DHRS3	2.39677	1.35213e-31	2.48148e-29	10.5565	8.33429
COL27A1	4.52648	1.81894e-31	3.27579e-29	8.50485	5.76788
THBS2	7.99494	1.81869e-31	3.27579e-29	9.42323	5.19176
ELF3	6.82998	2.0757e-31	3.70358e-29	10.1516	5.78024
TIMP1	3.49647	2.99751e-31	5.29927e-29	12.9962	9.6504
SEPP1	7.82137	3.33699e-31	5.84581e-29	10.9037	5.75123
C15orf48	4.73361	3.47819e-31	6.03827e-29	8.69108	5.68515
PIEZO2	9.43141	5.56737e-31	9.57887e-29	9.39001	4.96058
HSD3B7	3.90917	5.78604e-31	9.867e-29	8.37609	5.87642
C4A	5.4088	9.83658e-31	1.64827e-28	15.1378	10.2114
CD59	3.22948	1.34275e-30	2.23059e-28	11.7714	8.7948
LAMA3	7.68726	1.97055e-30	3.24551e-28	10.309	5.43126
EMP1	6.0209	2.70278e-30	4.34022e-28	10.6997	6.16227
EGFL6	9.33545	9.65451e-30	1.53754e-27	10.546	5.10054
TENM3	8.10724	1.14599e-29	1.8101e-27	8.34536	4.98547
LAMC2	8.75394	1.26272e-29	1.97826e-27	9.73888	5.20554
CRYAB	6.97088	1.73327e-29	2.69356e-27	7.90207	4.98729
CLEC1B	-4.46128	2.02908e-29	3.12803e-27	5.73873	8.41863
MLPH	9.86699	3.23736e-29	4.95111e-27	9.27333	4.95126
SH2D3C	-2.10826	5.16709e-29	7.84014e-27	8.48703	10.4236
RBP4	6.61129	7.06574e-29	1.06373e-26	8.46965	5.15942
CDH1	6.86286	2.10052e-28	3.13775e-26	12.2162	6.85045
TACC2	9.57752	2.50727e-28	3.71655e-26	9.93402	5.11897
EPB41L1	6.80384	2.98799e-28	4.39531e-26	9.65895	5.58308
TMEM37	7.80879	3.02633e-28	4.41798e-26	8.13123	5.0042
IGFBP6	5.94959	3.39756e-28	4.92263e-26	8.06327	5.18351
SHROOM3	9.3643	3.62851e-28	5.21802e-26	9.74549	5.08289
LAMB3	5.18431	3.81974e-28	5.45233e-26	10.4646	6.37705
CDH11	11.076	4.52766e-28	6.41529e-26	9.60092	4.80807
KRT7	8.28602	6.05731e-28	8.52003e-26	10.7015	5.3977
LMNA	3.53286	7.51284e-28	1.04153e-25	13.3111	9.92259
CXADR	6.03594	7.49023e-28	1.04153e-25	9.18959	5.63194
ADAM9	2.91846	8.22206e-28	1.13171e-25	14.8788	11.9117
CDCP1	5.13947	9.27739e-28	1.26791e-25	10.0574	6.18094
MUC1	7.40307	1.54913e-27	2.08754e-25	13.0773	7.13747
SERPINB2	4.09124	2.55379e-27	3.41747e-25	9.68309	6.53923
SEMA3B	6.31337	3.09898e-27	4.11844e-25	8.34414	5.27389
ITGB3	-5.23249	3.23974e-27	4.27602e-25	7.59511	12.2689
SCEL	9.04477	3.4552e-27	4.52937e-25	9.40196	5.01429
HAMP	6.71532	4.52962e-27	5.89769e-25	9.52902	5.52909
ITGB8	6.81332	7.10945e-27	9.19458e-25	9.2791	5.47138
UNC13B	3.96853	8.04949e-27	1.03409e-24	10.4024	7.08122
C1orf54	2.30201	1.41725e-26	1.80864e-24	8.70386	6.94589
FBN1	4.82262	1.57843e-26	2.00107e-24	11.1729	7.15516
SLC39A8	3.24687	1.73179e-26	2.18115e-24	11.6925	8.75313
MRC1	6.63748	1.90575e-26	2.38467e-24	16.6436	9.94781
ELL2	2.22347	2.1062e-26	2.61848e-24	10.7427	8.67001
CNN3	5.74449	2.94501e-26	3.63785e-24	10.0641	6.00993
COL4A5	7.07771	3.05093e-26	3.74468e-24	8.77124	5.13586
DOCK4	3.59776	3.36425e-26	4.1031e-24	12.0363	8.57508
KIFC3	2.69009	4.57911e-26	5.51497e-24	9.36623	7.15429
ITGA9	4.53248	4.87066e-26	5.82966e-24	11.0318	6.99301
B3GALNT1	3.21909	6.26468e-26	7.45188e-24	7.62254	5.8247
ITGA2B	-6.21416	6.99081e-26	8.26459e-24	6.26146	11.2565
KIAA1217	7.094	9.16084e-26	1.0764e-23	9.25054	5.38247
PDPN	8.13021	1.29763e-25	1.51547e-23	8.47817	4.91688
DMKN	4.23998	2.78511e-25	3.23308e-23	8.0541	5.70399
RASSF8	4.70758	2.87854e-25	3.32153e-23	8.1115	5.57385
ESRP1	8.54661	3.07931e-25	3.53204e-23	9.15176	5.14779
USP2	4.08581	3.97014e-25	4.50027e-23	6.97852	5.30888
EPHA2	5.88302	4.27053e-25	4.81246e-23	9.70261	5.79982
GPX8	7.41337	4.82071e-25	5.40087e-23	7.7946	4.94869
SLC6A14	8.50907	6.11662e-25	6.81314e-23	8.74788	4.97834
TEAD1	7.62397	6.80721e-25	7.53879e-23	8.97348	5.1322
XDH	5.75536	6.92854e-25	7.62931e-23	7.98925	5.28275
LILRB5	5.56643	7.09307e-25	7.76611e-23	8.90986	5.51167
TSPAN32	-2.72678	7.91548e-25	8.56917e-23	6.62601	8.70315
NHSL2	-2.59807	7.87763e-25	8.56917e-23	7.88167	10.2206
RGL1	4.34748	8.26619e-25	8.89885e-23	12.553	8.24401
CD244	-2.44072	1.4806e-24	1.58506e-22	8.38302	10.6765
FBLN1	7.1999	1.56357e-24	1.66464e-22	9.39045	5.40498
GP1BB	-11.2164	2.08813e-24	2.19882e-22	4.74173	8.35716
CD109	3.27657	2.28563e-24	2.3937e-22	10.5391	7.66927
SLC7A8	5.60552	2.60147e-24	2.70975e-22	9.82198	5.84079
MARCKS	2.50485	2.68865e-24	2.7855e-22	10.5404	8.25121
C6orf25	-5.69605	2.80337e-24	2.88882e-22	5.32193	8.03431
MMP2	7.72847	3.97276e-24	4.07208e-22	10.1382	5.3467
C6orf132	5.89214	4.13635e-24	4.21732e-22	8.70373	5.49633
CABLES1	4.89999	4.54389e-24	4.58433e-22	8.1956	5.57027
KRT8	4.3289	4.7294e-24	4.74664e-22	13.0421	9.17514
CGN	6.26911	5.004e-24	4.99622e-22	9.78593	5.80378
PADI4	-5.56537	6.21106e-24	6.16944e-22	5.68425	9.39932
SLIT2	8.15935	6.62664e-24	6.51507e-22	8.67142	4.97641
SVEP1	9.02445	6.61243e-24	6.51507e-22	9.71435	5.06473
CADPS2	10.3798	8.91846e-24	8.72379e-22	9.28566	4.87095
IL1R1	5.0446	9.83287e-24	9.56966e-22	10.7572	6.6044
RND3	9.55311	1.00128e-23	9.69584e-22	9.1286	4.84629
DES	6.06318	1.0984e-23	1.05831e-21	9.30025	5.66601
CCND1	3.30579	1.30341e-23	1.24959e-21	8.20895	6.08505
RGS9	-2.38585	1.32429e-23	1.26332e-21	7.72033	9.77643
FRAS1	8.57014	1.51065e-23	1.43401e-21	9.76738	5.10293
SHB	4.00356	1.73589e-23	1.63973e-21	8.31228	5.91058
TUBB6	3.12338	1.8031e-23	1.67854e-21	10.9912	8.09355
CALB2	11.139	1.80021e-23	1.67854e-21	8.438	4.74173
IL4I1	4.67328	1.86166e-23	1.71647e-21	9.51261	6.10614
LGI2	7.8604	2.8561e-23	2.60839e-21	8.10498	4.95914
SLC41A2	3.57257	3.22131e-23	2.92805e-21	8.55289	6.19809
SCD	3.69834	3.31221e-23	2.98917e-21	10.1719	7.06797
MARCO	5.23099	3.31957e-23	2.98917e-21	14.0347	8.71529
TNKS1BP1	2.41622	3.45262e-23	3.09451e-21	9.967	7.87651
FOLR2	4.89468	3.70613e-23	3.30635e-21	11.0742	6.96262
ABCA1	3.10215	3.72734e-23	3.30995e-21	14.5442	11.404
SBSN	6.59158	3.77973e-23	3.33103e-21	7.61697	5.01541
COL3A1	9.38158	3.78565e-23	3.33103e-21	14.1141	5.94035
TUSC3	11.2327	4.28193e-23	3.75058e-21	8.53056	4.74173
LRIG3	8.21198	4.36429e-23	3.80542e-21	8.24698	4.90816
MOCOS	6.08939	4.4628e-23	3.87379e-21	8.38664	5.38931
DCN	11.0378	4.84762e-23	4.18895e-21	9.60188	4.82289
KRT19	10.6777	5.26163e-23	4.52641e-21	11.6551	5.11125
C2	4.4728	5.77473e-23	4.94573e-21	12.7763	8.52887
S1PR5	-4.63878	5.94656e-23	5.07036e-21	5.31364	7.45739
AMOTL2	9.05744	7.52162e-23	6.35709e-21	8.70646	4.94226
BICC1	6.21547	7.70918e-23	6.48716e-21	9.07624	5.51281
LAMA1	7.11503	7.90312e-23	6.62144e-21	7.56876	4.96284
ARNT2	8.19464	8.22001e-23	6.85712e-21	8.1036	4.93107
SLIT3	8.16042	8.35204e-23	6.93723e-21	9.50426	5.16573
SERPING1	5.30192	9.40813e-23	7.78088e-21	13.1284	8.45466
BHLHE41	4.78068	9.83114e-23	8.09599e-21	10.5911	6.76942
FERMT2	6.12839	1.08403e-22	8.88902e-21	8.69185	5.39061
RAPH1	3.79688	1.71786e-22	1.39676e-20	11.1252	7.64667
KIAA1199	5.4898	1.85828e-22	1.50458e-20	13.5809	8.947
ERBB3	6.50732	2.41068e-22	1.94368e-20	11.116	6.30511
APOC2	7.36415	2.52167e-22	2.02469e-20	8.96465	5.11695
CGNL1	7.06627	2.72262e-22	2.17697e-20	8.44956	5.14574
IQGAP3	6.35926	3.04154e-22	2.42192e-20	8.92091	5.45791
CDR1	4.83088	3.60909e-22	2.84537e-20	8.95193	5.8642
CPA4	7.26386	3.61762e-22	2.84537e-20	9.19163	5.19419
PCOLCE2	10.2196	3.67069e-22	2.87537e-20	7.84278	4.74173
SLPI	8.90994	3.94595e-22	3.07848e-20	8.75246	4.95649
RAB37	-2.61031	4.13162e-22	3.21034e-20	7.33197	9.53949
PAPPA	6.28483	4.23595e-22	3.27819e-20	9.30817	5.61619
DSC3	7.32946	4.30658e-22	3.31951e-20	9.67575	5.32492
ERRFI1	4.67328	4.58818e-22	3.52248e-20	10.2759	6.55909
DAB2	3.4956	4.93502e-22	3.77372e-20	13.4035	9.93386
LIF	6.25377	4.99448e-22	3.80409e-20	8.66461	5.25726
COL12A1	9.46975	7.61314e-22	5.7758e-20	8.7847	4.93251
SCNN1A	6.49738	7.71859e-22	5.83283e-20	9.82901	5.81431
SCIN	6.2798	7.8585e-22	5.91536e-20	9.01949	5.52309
PTRF	6.99028	1.04186e-21	7.78162e-20	9.22465	5.32086
TANC1	4.57525	1.26433e-21	9.37063e-20	9.99902	6.6412
OBSL1	5.66416	1.41013e-21	1.04112e-19	8.03297	5.32692
CRYBB1	5.56129	1.44331e-21	1.06155e-19	7.01277	5.03706
PHLDB1	3.64494	2.1577e-21	1.57496e-19	8.63025	6.14941
RHBDF1	5.45362	2.53064e-21	1.83329e-19	7.69711	5.31508
LAD1	10.5324	2.70832e-21	1.95465e-19	8.90965	4.85381
SEMA6B	5.50091	2.73741e-21	1.96828e-19	10.4825	6.08703
MRC2	2.96512	2.79788e-21	2.00428e-19	8.48292	6.38823
NNMT	8.68553	3.2055e-21	2.28778e-19	8.5627	4.91304
APOE	8.75532	3.4065e-21	2.42226e-19	12.9259	5.8166
SPINK5	9.10842	3.50102e-21	2.48032e-19	8.79655	4.95914
OLFML2B	5.21089	3.69514e-21	2.60825e-19	10.1811	6.07088
EHD2	6.47755	4.49305e-21	3.137e-19	8.52804	5.35092
FRMD4A	4.02569	4.51575e-21	3.14146e-19	9.07748	6.22202
AOX1	6.90922	4.66492e-21	3.23356e-19	8.85617	5.30193
MT1G	5.31067	4.81812e-21	3.32778e-19	8.11733	5.4774
COL6A1	5.15948	9.39484e-21	6.46567e-19	11.694	7.47888
ICAM1	2.34189	9.59717e-21	6.5814e-19	11.7287	9.4028
RASAL2	3.88602	9.90805e-21	6.7705e-19	9.33396	6.47812
PKP3	7.03579	1.17988e-20	8.034e-19	7.74305	5.03444
SDC3	5.32931	1.26474e-20	8.55143e-19	9.80617	6.15413
OSR1	10.5668	1.26045e-20	8.55143e-19	8.00144	4.74173
BEND2	-7.63293	1.54436e-20	1.04055e-18	5.18207	8.31765
ABCA6	3.54927	1.57039e-20	1.05437e-18	8.68571	6.2791
DAB2IP	4.5791	1.5758e-20	1.05437e-18	8.24663	5.71138
NCS1	4.32816	1.62767e-20	1.0853e-18	7.06433	5.31508
WT1	10.5901	1.70491e-20	1.13289e-18	8.94077	4.81304
MYO1C	2.1876	1.81874e-20	1.20032e-18	11.4497	9.40366
TIMP3	5.21738	1.81885e-20	1.20032e-18	7.47724	5.177
SIPA1L2	2.83402	1.90879e-20	1.25537e-18	11.7433	8.94729
ST5	3.15939	2.08669e-20	1.36771e-18	8.11411	6.14029
SLC12A8	4.58751	2.26653e-20	1.48054e-18	7.75856	5.48674
IDH1	3.31665	2.30113e-20	1.49806e-18	12.6218	9.36963
MMRN1	-4.15687	2.31392e-20	1.50132e-18	6.18246	8.98609
KDR	11.1291	2.35452e-20	1.52253e-18	10.462	5.04892
CLIC2	2.83594	4.28875e-20	2.74565e-18	9.197	6.95935
CPM	2.87184	5.25271e-20	3.35165e-18	10.4776	7.90667
MPDZ	8.19419	5.33354e-20	3.39199e-18	8.54827	4.99018
PTPN13	3.11105	6.15008e-20	3.88564e-18	11.1729	8.32903
TRIP6	3.04582	6.70993e-20	4.2255e-18	7.99054	6.10387
IL13RA2	9.94485	7.82219e-20	4.89395e-18	8.99954	4.88116
COL4A1	5.33823	7.92178e-20	4.94021e-18	8.08334	5.46853
FKBP10	5.41897	8.45649e-20	5.25666e-18	8.30115	5.43752
HSPB8	8.95872	8.83891e-20	5.44789e-18	8.38334	4.83535
EEF1A2	7.55192	9.17611e-20	5.63133e-18	8.33187	5.12307
MALL	6.93748	1.00761e-19	6.16403e-18	9.29462	5.54672
MUC16	5.92799	1.02892e-19	6.25464e-18	12.5285	7.56132
CFI	9.42578	1.02697e-19	6.25464e-18	11.0118	5.08402
SPATS2L	4.03625	1.05841e-19	6.41367e-18	10.8572	7.51516
PTPN21	6.46487	1.08776e-19	6.57086e-18	8.42059	5.23463
THSD4	9.72573	1.20924e-19	7.28191e-18	7.88489	4.79307
SLC16A2	4.87422	1.26739e-19	7.60831e-18	8.02087	5.49839
PCDH7	8.64506	1.29586e-19	7.75506e-18	8.13668	4.83535
ASPH	2.20822	1.35844e-19	8.10435e-18	12.5399	10.3646
CCL18	8.67937	1.54911e-19	9.21336e-18	8.43513	4.95495
FBLN5	3.70657	1.70286e-19	1.00966e-17	8.97622	6.35944
EPCAM	8.78706	2.02763e-19	1.19123e-17	11.7296	5.54906
SH2D4A	5.72977	2.19298e-19	1.28446e-17	8.5754	5.4135
CHRDL1	10.092	2.21491e-19	1.29338e-17	7.65297	4.74173
GATA6	4.53807	2.60231e-19	1.515e-17	9.31894	6.18774
RBP1	6.62296	3.17179e-19	1.84097e-17	7.99788	5.20305
LAMP3	3.2971	3.48092e-19	2.01434e-17	8.23558	6.13006
ADSSL1	2.6328	3.5382e-19	2.04135e-17	8.02506	6.31183
LRP5	3.62593	4.00339e-19	2.30285e-17	9.79844	7.02297
ALCAM	2.62642	4.02985e-19	2.31116e-17	11.8216	9.38957
CLEC10A	3.2342	4.1053e-19	2.34745e-17	11.2433	8.16731
C1QC	6.67207	4.29857e-19	2.4507e-17	12.8149	6.55148
CFH	4.0756	4.61882e-19	2.62551e-17	13.6128	9.74324
ADORA3	4.36154	4.92598e-19	2.79187e-17	9.56398	6.40141
CPXM1	6.51826	5.29163e-19	2.99032e-17	8.52522	5.34828
PKIB	4.92672	5.76249e-19	3.23741e-17	6.97134	5.17117
GAS2L3	3.38404	5.84497e-19	3.2742e-17	9.58775	6.80412
ITGA2	4.34315	6.05015e-19	3.37931e-17	10.8888	7.30424
ALDH7A1	3.97583	6.55066e-19	3.64451e-17	9.7993	6.75628
AGRN	4.2775	6.56277e-19	3.64451e-17	10.5759	7.19806
NEBL	7.21329	7.05729e-19	3.90639e-17	9.15593	5.44816
RGS4	9.05601	7.07489e-19	3.90639e-17	8.20061	4.87796
TMEM40	-5.78125	7.23491e-19	3.98334e-17	5.12822	7.49804
MTHFD1L	2.0427	8.47054e-19	4.65035e-17	10.3967	8.46554
CHI3L1	7.13747	9.30455e-19	5.07928e-17	8.86244	5.16861
SRPX2	6.3538	9.38206e-19	5.10713e-17	7.75191	5.03248
PTPRU	6.6643	9.51525e-19	5.16504e-17	8.9804	5.5143
TNFRSF11B	9.18538	1.05836e-18	5.71278e-17	8.71896	4.91389
THY1	9.30967	1.06597e-18	5.73779e-17	7.58697	4.78869
CX3CR1	-3.46298	1.23293e-18	6.618e-17	7.74786	10.8339
ITGA3	4.31307	1.31147e-18	7.02e-17	10.6877	7.23483
CAV1	5.72116	1.45606e-18	7.76674e-17	8.11068	5.35692
PTPN3	6.77372	1.45903e-18	7.76674e-17	8.53653	5.30531
PF4V1	-10.0357	1.54871e-18	8.2214e-17	4.74173	7.44504
ALPL	6.13267	1.70806e-18	9.01765e-17	7.65802	5.2038
WFDC2	8.38129	2.0333e-18	1.06762e-16	8.0943	4.89609
FSCN1	3.51395	2.0576e-18	1.07745e-16	8.9272	6.40524
PDGFRA	5.26975	2.23587e-18	1.16762e-16	9.65865	5.89464
STEAP1	10.3789	2.37761e-18	1.23829e-16	8.22071	4.78869
KCNK5	3.17972	2.71601e-18	1.41071e-16	6.75548	5.4479
VLDLR	4.69781	2.90054e-18	1.50251e-16	9.55638	6.28205
ARHGAP23	4.48584	2.97517e-18	1.53704e-16	8.46461	5.77465
JAG1	2.1588	3.01504e-18	1.55347e-16	10.1784	8.2272
SPON2	-3.09223	3.28475e-18	1.68343e-16	6.41331	8.66719
SHE	5.66315	3.29519e-18	1.68431e-16	7.35874	5.20404
SFN	5.80134	3.40311e-18	1.73487e-16	7.96519	5.36739
CTGF	10.0591	3.57478e-18	1.81757e-16	8.32251	4.83918
STARD13	4.12131	3.90202e-18	1.97354e-16	8.70393	5.98289
SLFN14	-4.01886	4.03551e-18	2.0304e-16	5.68014	7.77434
MMP19	5.38702	4.44149e-18	2.22884e-16	8.4418	5.52358
IFI27	7.41848	4.4953e-18	2.24998e-16	8.33666	5.09848
MYRF	3.82468	4.67431e-18	2.33352e-16	9.24145	6.50719
MEFV	-3.06938	4.76684e-18	2.37357e-16	9.07453	12.049
ANXA3	5.57465	4.87293e-18	2.41392e-16	9.1078	5.6284
MAGI1	6.62663	5.46595e-18	2.69383e-16	8.54361	5.25481
DIAPH3	3.89746	5.76797e-18	2.83543e-16	9.16173	6.40292
SCARB2	2.15822	5.86687e-18	2.8767e-16	12.0959	10.0191
PLA2G2A	10.3091	6.30621e-18	3.08428e-16	10.1009	4.92865
NID2	3.95648	6.54958e-18	3.1791e-16	9.63744	6.75229
FLRT2	10.0831	6.58459e-18	3.18807e-16	7.9418	4.78869
TFPI2	6.95984	7.13585e-18	3.44631e-16	8.07965	5.09892
GAREM	5.97689	8.62404e-18	4.15463e-16	7.62464	5.20551
TIMD4	3.45245	8.70751e-18	4.18438e-16	10.1876	7.31176
AHNAK2	3.55422	8.81045e-18	4.22028e-16	12.6347	9.33682
RGS16	4.28592	8.82601e-18	4.22028e-16	8.11047	5.74562
GTF2IRD1	5.29319	9.24974e-18	4.41194e-16	8.35907	5.6251
BCAR3	3.76782	9.72968e-18	4.6294e-16	8.38829	6.04332
GP9	-9.06604	9.96393e-18	4.72919e-16	4.74173	6.92697
EPS8	3.6783	1.08187e-17	5.10971e-16	11.1448	7.66048
SERPINE1	5.50564	1.07941e-17	5.10971e-16	11.4818	7.10445
CCL2	8.52543	1.10784e-17	5.21959e-16	11.5581	5.37013
GPR110	6.22689	1.15821e-17	5.44358e-16	8.33847	5.37063
LRP2	11.2911	1.17816e-17	5.52389e-16	9.72252	4.86634
SDC4	4.6125	1.26691e-17	5.91121e-16	9.69955	6.46725
PMP22	6.02349	1.34015e-17	6.23786e-16	10.5737	6.10518
TMC5	8.60865	1.3442e-17	6.2416e-16	11.1243	5.76356
PTPRF	6.24026	1.35802e-17	6.29062e-16	10.9393	6.36283
COL17A1	6.22899	1.37912e-17	6.37307e-16	10.5202	6.30518
ITGAL	-2.07061	1.42409e-17	6.56512e-16	11.8789	14.0295
DOCK1	4.61803	1.48493e-17	6.82924e-16	10.9048	7.05802
PROM2	5.31283	1.52912e-17	7.01576e-16	8.43992	5.55869
TNXB	4.07032	1.55626e-17	7.1233e-16	11.7274	8.0245
HECTD2	2.66552	1.58972e-17	7.25314e-16	8.7641	6.77686
PIGR	6.82039	1.59215e-17	7.25314e-16	8.53808	5.35199
PXDC1	4.31868	1.63335e-17	7.42328e-16	8.16733	5.73794
BGN	8.32661	2.02781e-17	9.12989e-16	7.91673	4.97064
PARVA	5.65048	2.15743e-17	9.66828e-16	8.47298	5.37704
RIMS1	9.03799	2.32642e-17	1.03773e-15	7.0081	4.74173
RAB13	2.63309	2.33485e-17	1.03909e-15	10.5478	8.14932
TLN2	3.18343	2.41535e-17	1.06997e-15	8.97598	6.59112
MYO5C	4.60041	2.41407e-17	1.06997e-15	10.1801	6.83352
PCLO	7.34651	2.4759e-17	1.09428e-15	9.02914	5.35181
FCRL6	-3.02309	2.56324e-17	1.13029e-15	6.91976	9.47635
ANLN	4.2536	2.67067e-17	1.17497e-15	9.65041	6.60653
HSPG2	4.50992	2.6992e-17	1.18482e-15	11.4535	7.67259
ITGB6	10.4041	2.71344e-17	1.18836e-15	7.7103	4.74173
RASEF	10.0161	2.85075e-17	1.24567e-15	8.64867	4.88473
TRAF3IP3	-2.41839	3.06949e-17	1.33821e-15	9.88028	12.3557
GHR	7.33583	3.19673e-17	1.39054e-15	7.40721	4.92472
COL8A1	9.41091	3.50733e-17	1.51879e-15	8.29812	4.82289
LXN	2.2268	3.52457e-17	1.52284e-15	9.14444	7.33721
PLXNB1	4.2731	3.78457e-17	1.63152e-15	8.94655	6.18822
PPIC	6.76665	4.04322e-17	1.73913e-15	7.2394	4.95615
KIRREL	7.77488	4.76658e-17	2.04116e-15	7.49161	4.91767
GATM	3.53756	5.46415e-17	2.32437e-15	9.57793	6.80327
SPRY1	3.52377	5.79947e-17	2.46158e-15	8.26727	6.02171
FUT3	7.87697	6.54274e-17	2.77096e-15	8.3347	5.00292
TDO2	9.43773	6.63377e-17	2.80335e-15	7.2098	4.74173
NPNT	9.54524	6.72319e-17	2.83492e-15	8.27476	4.89992
HS3ST1	4.18218	7.44111e-17	3.13079e-15	6.95004	5.32018
CNTNAP3B	7.01091	7.64747e-17	3.2106e-15	7.44645	4.96178
LRRN4	6.36944	8.19656e-17	3.41878e-15	7.29664	5.06721
TTC16	-3.19561	9.04841e-17	3.76594e-15	6.72692	9.21765
TBL2	2.01785	9.31539e-17	3.86038e-15	9.85517	8.07203
SDR16C5	7.06704	1.06902e-16	4.41114e-15	7.86961	5.01146
GLIS2	3.89684	1.20445e-16	4.95936e-15	8.12102	5.83948
DST	3.22659	1.23441e-16	5.07189e-15	13.8454	10.8106
SLC16A1	2.04257	1.2753e-16	5.22872e-15	10.5183	8.69422
FMOD	7.51234	1.3511e-16	5.52775e-15	7.36295	4.93522
CCDC65	-2.12814	1.55445e-16	6.34624e-15	6.37718	7.78905
ADAMTS15	8.76174	1.57262e-16	6.40686e-15	7.18626	4.78869
PTCH1	-2.01082	1.58566e-16	6.44635e-15	8.69942	10.6151
PTGR1	4.65893	1.62771e-16	6.60336e-15	9.04044	5.90739
GRIK2	8.78099	1.68971e-16	6.84048e-15	8.25794	4.89676
CD209	4.20956	1.69951e-16	6.86573e-15	9.91743	6.7333
TUFT1	3.43186	1.7651e-16	7.11581e-15	9.294	6.8017
CSF1	2.42696	1.79535e-16	7.22264e-15	7.58089	6.10363
FGD5	5.30402	1.85213e-16	7.43554e-15	7.22014	5.18879
KCNQ3	7.73388	1.86994e-16	7.4914e-15	8.35949	5.12137
FBP1	2.51603	1.90302e-16	7.60813e-15	12.2935	9.81886
TOM1L1	5.20801	1.95777e-16	7.81082e-15	8.98994	5.81114
C11orf21	-2.9853	2.03552e-16	8.07088e-15	6.49466	8.76973
CDKN1A	2.06498	2.03376e-16	8.07088e-15	10.9502	8.97247
SNCAIP	10.1881	2.13454e-16	8.42882e-15	7.95838	4.79307
PTGFRN	3.46759	2.31217e-16	9.07445e-15	9.18088	6.48946
NQO1	4.24859	2.35163e-16	9.19186e-15	9.24607	6.32457
PVRL4	6.66005	2.34703e-16	9.19186e-15	8.10573	5.07962
GPR56	-2.9456	2.37444e-16	9.26226e-15	9.26065	12.2292
PALLD	2.43871	2.3935e-16	9.31772e-15	11.234	8.88515
KRT15	9.96335	2.42657e-16	9.42741e-15	7.81619	4.79307
GULP1	8.2697	2.53526e-16	9.79048e-15	7.77388	4.93522
ATF5	2.69439	2.94801e-16	1.13163e-14	9.03256	6.97963
COL23A1	4.32593	2.96895e-16	1.13741e-14	6.85112	5.2326
MMP15	5.43774	3.09579e-16	1.18131e-14	7.93521	5.4286
MATN2	2.9523	3.15151e-16	1.20019e-14	7.70385	5.97076
CA9	6.75917	3.1948e-16	1.21428e-14	7.08196	4.93765
GFI1B	-6.81004	3.29584e-16	1.25021e-14	4.97995	7.9579
ADAMDEC1	3.45439	3.3152e-16	1.25509e-14	8.24092	6.04025
ACP2	2.18326	3.45796e-16	1.30656e-14	9.37792	7.54573
MT1E	3.44675	3.46626e-16	1.30714e-14	9.35148	6.70564
MYO1B	4.56347	3.54278e-16	1.33339e-14	10.2052	6.8242
ABCA8	7.85854	3.56848e-16	1.34044e-14	8.22442	4.97478
SEZ6L2	8.65079	3.67748e-16	1.37602e-14	7.47555	4.84696
SLC44A4	5.13868	3.75539e-16	1.40245e-14	9.05441	5.84115
S100A16	9.62859	3.78374e-16	1.4103e-14	7.66271	4.78869
DSP	5.95859	3.82618e-16	1.42337e-14	12.1828	7.00349
MYO5B	5.30231	3.86482e-16	1.43497e-14	11.2151	7.26258
PCBD1	2.01041	3.9206e-16	1.45288e-14	9.10683	7.40248
KLF5	4.00069	4.11566e-16	1.52224e-14	10.7269	7.46988
DDR2	3.8198	4.23491e-16	1.56036e-14	8.74453	6.19845
PPAP2B	5.32976	4.36935e-16	1.60682e-14	8.52033	5.47441
PPL	4.30357	4.82066e-16	1.76605e-14	10.1037	6.90497
IL10	5.04012	4.89084e-16	1.78836e-14	10.3094	6.41136
C1orf177	-3.53983	4.90643e-16	1.79066e-14	5.39137	6.7591
PXDN	6.12211	5.20352e-16	1.89192e-14	9.26364	5.58416
WWC1	4.64977	5.32451e-16	1.93226e-14	9.4608	6.26451
BMP2	6.83581	5.3742e-16	1.94663e-14	7.28588	4.94589
PLEKHA6	4.49043	5.66123e-16	2.04675e-14	7.99685	5.65613
SH3BP4	3.36939	6.71394e-16	2.41827e-14	8.41573	6.22784
S100A14	9.44204	7.02268e-16	2.52476e-14	7.11769	4.74173
EDNRB	5.70813	7.0789e-16	2.54023e-14	8.96463	5.49477
LGALS3BP	3.20535	8.5162e-16	3.04466e-14	10.1526	7.47414
GRB7	9.15839	8.99423e-16	3.20961e-14	7.7313	4.80807
PCDHGC3	3.59202	9.45647e-16	3.36832e-14	8.18066	5.94794
CPE	6.96046	1.02555e-15	3.63277e-14	8.93951	5.13618
CEP170B	3.8695	1.08092e-15	3.81488e-14	9.30405	6.39888
SHANK2	6.88771	1.08405e-15	3.81895e-14	8.30901	5.16725
ROR1	5.26891	1.11508e-15	3.91394e-14	8.53544	5.55505
NFE2	-3.71058	1.13399e-15	3.97309e-14	6.31005	8.89519
PPFIBP1	2.59433	1.20224e-15	4.20458e-14	9.42549	7.37161
ID4	9.18578	1.2501e-15	4.36401e-14	7.02405	4.74173
TNFRSF11A	3.97445	1.28678e-15	4.48394e-14	9.90622	6.79596
STEAP3	3.2575	1.36098e-15	4.72543e-14	9.68638	6.91834
TUBB2A	2.9451	1.36663e-15	4.73649e-14	11.5535	8.74044
RAB25	6.70098	1.3885e-15	4.80366e-14	8.28171	5.28457
ARHGAP29	3.21805	1.5369e-15	5.30753e-14	9.54215	7.07786
LAYN	2.86362	1.54457e-15	5.32448e-14	7.12044	5.72161
C1QA	5.52863	1.61594e-15	5.56055e-14	13.2189	7.59853
SEMA3A	4.81886	1.71963e-15	5.9001e-14	9.00496	5.97064
NAV3	6.05734	1.72074e-15	5.9001e-14	6.86421	4.96424
FLRT3	7.51828	1.72459e-15	5.90281e-14	7.35115	4.92144
MAP7	3.1706	1.75544e-15	5.99775e-14	8.80677	6.56657
NPR1	8.86425	1.85209e-15	6.29449e-14	7.22795	4.80247
RBFOX2	4.13648	1.96411e-15	6.65173e-14	8.79729	6.12252
LRRC2	3.93462	1.99936e-15	6.75923e-14	7.19641	5.44341
MTUS1	4.55493	2.09949e-15	7.0853e-14	10.5534	7.12152
FOXA1	11.6117	2.12141e-15	7.14679e-14	9.1154	4.80807
CMTM5	-8.25087	2.15885e-15	7.26022e-14	4.74173	6.46759
CDON	3.64214	2.20122e-15	7.38982e-14	9.89929	7.10102
IGF1	5.91617	2.30027e-15	7.7089e-14	7.45907	5.18563
MEIS3P1	3.35744	2.33406e-15	7.80857e-14	7.02425	5.52237
NCR3	-2.54777	2.34484e-15	7.83103e-14	5.79771	7.09861
C1QB	6.12772	2.44477e-15	8.15066e-14	13.9684	7.50251
ACSS3	7.65876	2.59891e-15	8.63465e-14	7.57863	4.89361
CEACAM5	10.4257	2.64448e-15	8.77093e-14	12.2605	6.13829
APLP1	4.96268	2.69873e-15	8.93549e-14	6.94348	5.17336
PRICKLE2	4.77918	2.70819e-15	8.95142e-14	7.44743	5.37102
SLC28A3	3.20203	2.82364e-15	9.30112e-14	8.23184	6.15275
RARRES1	4.81439	3.11057e-15	1.02288e-13	8.96926	5.86874
PCDHA13	8.41533	3.14845e-15	1.03357e-13	6.63952	4.74173
GPC3	6.0544	3.30345e-15	1.08261e-13	7.84015	5.24133
MUC4	8.46731	3.38288e-15	1.10676e-13	13.5805	7.73971
ADAMTS1	3.40627	3.76302e-15	1.22696e-13	9.958	7.19637
FILIP1L	2.57153	3.78411e-15	1.23175e-13	9.62301	7.37605
PTGDR	-2.35123	4.06213e-15	1.32002e-13	7.0713	8.95015
FRK	7.82142	4.08357e-15	1.32299e-13	8.1108	5.08631
TENM2	8.56531	4.08499e-15	1.32299e-13	7.67163	4.9077
LIMCH1	6.66978	4.11658e-15	1.33098e-13	10.1345	5.64837
PTPRH	6.56613	4.12597e-15	1.33178e-13	9.10172	5.52766
CLDN7	4.98975	4.17159e-15	1.34426e-13	8.70215	5.80133
PRF1	-3.05591	4.53873e-15	1.46012e-13	9.54483	12.7869
CKMT1A	9.16829	5.15281e-15	1.65216e-13	8.19784	4.94381
EHF	6.51091	5.47789e-15	1.75056e-13	7.8699	5.20607
DPYS	6.83216	5.47328e-15	1.75056e-13	8.09188	5.25253
CLDN12	5.5338	6.37848e-15	2.03163e-13	7.90525	5.4532
HSPB1	3.57638	6.61521e-15	2.10355e-13	11.9952	9.01072
RBMS3	3.92922	6.9988e-15	2.22186e-13	7.67983	5.64375
MEIS2	6.69425	7.24129e-15	2.29506e-13	8.08406	5.04655
KREMEN1	2.63773	7.70797e-15	2.43896e-13	8.42752	6.57108
OLR1	5.16602	8.16216e-15	2.57844e-13	9.92129	5.92484
SLCO4A1	4.42734	8.22751e-15	2.59483e-13	8.05922	5.62424
ESPL1	2.53561	8.34706e-15	2.62823e-13	7.53731	6.06959
MEDAG	8.02377	8.4203e-15	2.64697e-13	7.38829	4.89829
ALOX15	5.10137	8.4631e-15	2.65609e-13	6.77286	5.07975
IER3	2.73742	8.54245e-15	2.67663e-13	11.6905	8.95538
ZFHX4	6.158	8.8306e-15	2.76243e-13	7.44461	5.13867
KLK11	9.86252	9.06382e-15	2.83079e-13	7.34763	4.74173
LAMB2	3.15243	9.23485e-15	2.87954e-13	10.429	7.68915
GPR126	4.48359	9.409e-15	2.92772e-13	9.26477	6.13134
PTPN14	5.31923	9.44014e-15	2.92933e-13	8.66136	5.75257
TCHH	4.23482	9.66643e-15	2.99473e-13	7.80798	5.50701
NRGN	-4.26894	9.7792e-15	3.0248e-13	5.58862	7.58166
MTSS1L	2.2221	1.028e-14	3.16952e-13	7.99095	6.51401
CDH6	5.16557	1.08646e-14	3.33909e-13	7.98826	5.39806
CSMD2	6.875	1.14047e-14	3.49394e-13	6.95992	4.88058
DFNA5	2.99941	1.16062e-14	3.55004e-13	8.61918	6.51053
FTL	2.07658	1.28583e-14	3.92678e-13	17.035	14.9325
UBD	6.80242	1.35335e-14	4.12643e-13	7.18969	4.94555
GLI3	3.82569	1.42376e-14	4.33425e-13	9.06994	6.39673
SMARCA1	3.95049	1.42746e-14	4.33868e-13	8.99316	6.25181
TSPAN15	3.87031	1.46661e-14	4.44365e-13	8.78001	6.23458
GPR114	-2.59354	1.52424e-14	4.61102e-13	6.645	8.66937
SLC2A10	6.3052	1.62854e-14	4.9188e-13	7.56537	5.10199
MST1R	5.35795	1.64625e-14	4.96451e-13	7.89162	5.40942
PCGF2	4.65113	1.67287e-14	5.02904e-13	8.00321	5.61878
CCL20	5.40628	1.70077e-14	5.10495e-13	7.35954	5.16986
PRKD1	5.26827	1.76297e-14	5.28342e-13	8.208	5.48813
SDC1	8.22376	1.80431e-14	5.39892e-13	7.81803	4.90305
GPC6	8.05679	2.03686e-14	6.08532e-13	7.46921	4.87881
MT2A	2.48285	2.07576e-14	6.18237e-13	11.7327	9.37373
EPS8L2	4.49008	2.13505e-14	6.34914e-13	8.79265	6.04065
PLOD2	4.21532	2.20346e-14	6.54248e-13	10.2561	6.7975
KIAA1522	3.98431	2.24501e-14	6.65559e-13	8.03012	5.79862
RHPN2	4.75811	2.28013e-14	6.74932e-13	8.33759	5.77637
EPB41L4B	9.83873	2.60938e-14	7.67676e-13	7.21065	4.74173
LAMA4	9.47094	2.65664e-14	7.80389e-13	10.8511	5.01073
RARRES2	8.28433	2.83189e-14	8.30601e-13	7.50151	4.87378
LTBP2	3.36331	3.00823e-14	8.80983e-13	9.18379	6.73264
GPC4	4.84479	3.28931e-14	9.60379e-13	7.74186	5.47873
FAM83H	2.83158	3.41081e-14	9.94346e-13	9.15418	7.03286
DLC1	3.82908	3.48513e-14	1.01448e-12	8.64192	6.11093
TACSTD2	8.83872	3.50549e-14	1.01886e-12	9.18428	5.05245
GALNT18	6.76211	3.51147e-14	1.01907e-12	6.8702	4.91946
PIR	6.06956	3.68899e-14	1.06897e-12	7.36229	5.03727
NEURL2	4.16524	3.77321e-14	1.09174e-12	7.6013	5.48902
GEM	6.28644	4.10836e-14	1.18161e-12	6.73114	4.92787
CLDND2	-2.7279	4.20866e-14	1.20686e-12	5.60741	6.83301
NKG7	-3.03075	4.25909e-14	1.21951e-12	6.84547	9.3583
MYH10	3.04558	4.28942e-14	1.22637e-12	10.4893	7.97169
LAMA5	3.53023	4.53056e-14	1.29339e-12	9.31427	6.66124
CYP7B1	5.51162	4.81685e-14	1.37106e-12	7.90129	5.24934
KCNK1	6.88314	4.91912e-14	1.3981e-12	7.22609	4.90786
PPAP2C	6.88608	5.06944e-14	1.43659e-12	7.50117	5.00023
TRIP10	2.54759	5.23666e-14	1.4818e-12	8.9191	6.96045
ALOX12	-3.43767	5.25595e-14	1.48508e-12	6.0496	8.12133
PLA2G15	2.25015	5.36151e-14	1.51268e-12	8.73393	6.95468
MYO10	3.83639	5.49959e-14	1.54937e-12	9.76332	6.93465
SPINK1	9.58679	5.53095e-14	1.55593e-12	7.78592	4.85133
PLA2R1	8.57254	5.55088e-14	1.55926e-12	7.38809	4.80807
SLC34A2	9.28413	5.58515e-14	1.56661e-12	10.9185	5.45931
TEAD3	5.16135	5.69754e-14	1.59581e-12	7.13439	5.22203
VSIG4	5.16615	5.82567e-14	1.62933e-12	14.0129	8.27353
GPC1	3.77063	5.99346e-14	1.67383e-12	7.752	5.74385
GADD45G	3.9429	6.10334e-14	1.70205e-12	6.98292	5.40492
AADAC	9.23785	6.70521e-14	1.86449e-12	7.01094	4.74173
SNX8	2.10892	7.37394e-14	2.04113e-12	8.70718	7.07535
C8orf4	9.70819	7.38279e-14	2.04113e-12	7.27523	4.74173
EML1	8.38125	7.81043e-14	2.15317e-12	6.90928	4.79999
SOCS6	2.24593	7.96112e-14	2.19158e-12	8.8581	7.03985
BAIAP2L1	3.96071	8.1567e-14	2.24222e-12	9.08875	6.47714
DOCK6	3.55222	8.3802e-14	2.30038e-12	7.59489	5.74597
GRHL2	7.00426	8.8161e-14	2.41316e-12	8.73075	5.27312
BMP1	2.15448	9.69719e-14	2.64307e-12	8.94866	7.28303
MERTK	3.26115	9.68905e-14	2.64307e-12	13.2194	9.83176
ARHGAP28	7.18481	9.77972e-14	2.6618e-12	8.32575	4.95939
NRIP3	2.43504	1.00859e-13	2.74125e-12	6.89407	5.71345
EFNA1	6.61112	1.06471e-13	2.88972e-12	8.31412	5.46512
CKB	5.3743	1.07312e-13	2.90844e-12	8.44702	5.73964
FARP1	3.82016	1.12418e-13	3.03828e-12	9.49039	6.68276
FABP3	4.25389	1.13918e-13	3.07452e-12	8.22648	5.83973
ABCA12	6.2827	1.15364e-13	3.10918e-12	8.20136	5.18049
TSKU	3.41627	1.21979e-13	3.28286e-12	6.72364	5.3954
DMD	3.28193	1.31108e-13	3.51874e-12	8.58958	6.31376
FAM20A	4.04817	1.33733e-13	3.58419e-12	12.6949	8.3416
BCHE	9.31909	1.34351e-13	3.59576e-12	7.3425	4.80247
GPX3	3.46427	1.41818e-13	3.79034e-12	7.72882	5.87059
EFNA5	3.94467	1.61856e-13	4.31669e-12	7.502	5.61387
TRPM4	4.40663	1.6196e-13	4.31669e-12	9.298	6.44169
HAS1	5.29457	1.78312e-13	4.74597e-12	7.03606	5.17918
SPTLC3	4.18336	1.83706e-13	4.87938e-12	7.3946	5.51285
ITLN1	6.73301	1.83831e-13	4.87938e-12	8.84856	5.46627
FAM20C	3.16292	1.90475e-13	5.04183e-12	11.5005	8.26383
CDC42EP3	-2.23629	1.94115e-13	5.1241e-12	7.50801	9.36376
FLT1	3.75661	2.02392e-13	5.33529e-12	9.93004	7.03927
DPYSL3	8.65743	2.1497e-13	5.6591e-12	9.54956	4.92093
KLRF1	-3.04658	2.16282e-13	5.68589e-12	7.10482	9.757
GABRE	7.29546	2.16641e-13	5.68757e-12	7.47003	4.92881
GPR34	2.50489	2.33729e-13	6.12783e-12	8.76354	6.84188
MUC13	8.97328	2.36824e-13	6.20054e-12	9.49433	5.16256
PTPRD	4.05445	2.38685e-13	6.24078e-12	6.87301	5.33308
C1orf116	6.13639	2.41128e-13	6.29612e-12	8.04257	5.45012
CREB3L1	7.05815	2.42932e-13	6.33464e-12	7.43912	5.02075
ARHGEF38	10.1347	2.43372e-13	6.33753e-12	7.46106	4.79222
ARSI	7.40655	2.44837e-13	6.36709e-12	6.11844	4.74173
KIR3DL2	-2.64844	2.52614e-13	6.55164e-12	6.91693	8.91851
LGR4	3.91983	2.52443e-13	6.55164e-12	9.10826	6.52518
NOS1AP	7.40894	2.80322e-13	7.26049e-12	7.69517	5.04503
ARHGEF16	8.6339	2.827e-13	7.31226e-12	7.49267	4.85941
ARMC9	3.37408	2.97104e-13	7.66424e-12	8.30558	6.15332
GXYLT2	8.36059	3.04589e-13	7.83636e-12	6.57987	4.74173
NR2F2	8.44497	3.08134e-13	7.917e-12	7.55743	4.82289
CXCL12	7.87429	3.1494e-13	8.08109e-12	7.44554	4.93251
HMGB3	2.38821	3.23517e-13	8.29013e-12	8.61031	6.86878
C1orf106	7.20508	3.30432e-13	8.45608e-12	7.38924	4.95003
ASS1	4.35789	3.47571e-13	8.88289e-12	11.1398	7.68068
KRT80	5.71357	3.49362e-13	8.91684e-12	7.22922	5.19181
EPB41L2	2.64491	3.50365e-13	8.9306e-12	12.0348	9.67406
DRAM1	2.29123	3.50979e-13	8.93444e-12	9.2607	7.39496
SAA1	6.24038	3.63201e-13	9.23335e-12	7.40305	5.06489
HAVCR2	2.0347	3.70353e-13	9.40276e-12	11.0861	9.13295
CA6	-2.42241	3.72768e-13	9.45163e-12	5.81793	7.01343
LIFR	8.01461	4.4339e-13	1.11688e-11	7.89677	4.91652
SPTBN2	4.25012	4.57531e-13	1.151e-11	8.59299	6.06704
GLI2	7.93871	5.1309e-13	1.28573e-11	6.67275	4.79222
AKAP12	5.2398	5.32161e-13	1.33178e-11	9.23183	6.03843
LAMB1	3.30642	5.38107e-13	1.34492e-11	9.98261	7.29831
TMEM98	8.33825	5.4458e-13	1.35933e-11	7.46719	4.82289
PON2	2.48131	5.65941e-13	1.41083e-11	11.3538	9.16146
MFI2	4.22242	5.68012e-13	1.41416e-11	7.79913	5.61587
IGSF3	5.12454	5.75544e-13	1.43106e-11	7.59138	5.37909
PLSCR4	4.43435	5.77749e-13	1.43469e-11	7.52556	5.45264
LUM	9.14676	5.83179e-13	1.44631e-11	6.91847	4.74173
KIAA1244	6.6061	6.05166e-13	1.49891e-11	8.98255	5.32456
TMEM236	4.49178	6.19533e-13	1.53253e-11	9.54236	6.52177
RAI14	6.25786	6.25644e-13	1.54566e-11	9.48863	5.81231
GDF15	5.52941	6.33359e-13	1.56272e-11	7.30459	5.27554
ITIH5	4.24145	6.65944e-13	1.63297e-11	7.38105	5.48198
TNFRSF12A	4.688	6.6607e-13	1.63297e-11	6.44002	5.0512
EPB41L3	2.00447	6.73837e-13	1.64992e-11	13.1911	11.1736
TSPAN12	8.42631	6.8126e-13	1.66598e-11	7.25959	4.82399
PTPRQ	8.54862	6.90534e-13	1.68651e-11	7.72739	4.83535
PROCR	2.80131	7.17832e-13	1.75097e-11	8.82599	6.78984
PDE10A	8.34653	7.41551e-13	1.80653e-11	6.84568	4.78869
SDC2	4.90704	7.55242e-13	1.83756e-11	7.52089	5.33182
NAV1	2.34397	7.93558e-13	1.92836e-11	10.1604	8.19024
EFNB2	5.02757	8.21835e-13	1.99204e-11	7.14612	5.28118
NOSTRIN	6.1888	8.73642e-13	2.11496e-11	7.01981	5.06625
SLC26A9	8.39078	9.12995e-13	2.20469e-11	7.28534	4.85133
MYO7A	3.20513	9.23507e-13	2.22728e-11	11.4043	8.19542
ACVRL1	3.32401	9.78669e-13	2.35442e-11	9.6204	6.75818
HNF1B	8.39572	1.03371e-12	2.47756e-11	7.15277	4.84003
MLF1	2.95367	1.0398e-12	2.48907e-11	7.68887	5.9666
TAL1	-7.25238	1.0877e-12	2.59728e-11	4.81271	6.55961
MACC1	5.48303	1.11046e-12	2.64835e-11	9.29909	6.25213
CRISPLD1	5.84574	1.13789e-12	2.7104e-11	7.07633	5.12947
CELSR1	2.68296	1.18871e-12	2.82448e-11	9.50723	7.32985
GALNT5	5.30169	1.21778e-12	2.88997e-11	7.35213	5.2298
FAM65B	-2.50473	1.22576e-12	2.90533e-11	10.71	13.4151
NAALADL2	5.26542	1.24378e-12	2.94443e-11	8.13678	5.52456
CDH2	5.36295	1.39007e-12	3.28267e-11	7.73519	5.19518
TNNT2	7.50717	1.42967e-12	3.37206e-11	6.47078	4.78869
SLC7A11	4.0342	1.44371e-12	3.40101e-11	7.89716	5.75589
STEAP2	5.02222	1.44808e-12	3.40714e-11	7.55269	5.33088
ARHGAP44	4.71945	1.50218e-12	3.53013e-11	7.52908	5.39273
VAT1	2.13017	1.57926e-12	3.70224e-11	9.91033	8.05678
CTNND1	2.03435	1.61739e-12	3.78702e-11	12.2047	10.1821
CYSTM1	2.54876	1.6785e-12	3.92533e-11	7.8281	6.21398
C1QTNF1	7.90991	1.74436e-12	4.07441e-11	6.63665	4.80247
LY6G6F	-7.2081	1.78358e-12	4.16096e-11	4.86207	6.78838
CADM3	7.79975	1.79319e-12	4.17833e-11	7.71407	4.99213
GNAZ	-3.61512	1.8287e-12	4.25078e-11	6.05295	8.32175
GZMH	-3.10415	1.90091e-12	4.4027e-11	7.55342	10.5457
SLC19A3	8.06335	1.90014e-12	4.4027e-11	6.71014	4.80247
IL6	4.11791	2.02797e-12	4.68012e-11	8.18141	5.70371
NET1	2.36384	2.15901e-12	4.97082e-11	10.3255	8.33371
AMOTL1	2.52535	2.15909e-12	4.97082e-11	9.02826	7.06538
MFAP2	6.68464	2.33158e-12	5.34875e-11	7.30286	4.98691
LPIN3	5.34589	2.37711e-12	5.44671e-11	7.76797	5.44275
DNAH11	5.8884	2.53811e-12	5.80183e-11	8.67983	5.81513
NAV2	4.5295	2.59299e-12	5.91325e-11	9.75821	6.55523
BCAR1	7.92916	2.61266e-12	5.95106e-11	6.97545	4.84943
GP1BA	-2.86633	2.61624e-12	5.95217e-11	8.06183	10.5475
GNG12	8.10419	2.7232e-12	6.18821e-11	6.43061	4.74173
MARVELD2	5.01991	3.13071e-12	7.08917e-11	8.41404	5.85925
CXCL1	4.26807	3.30087e-12	7.43951e-11	7.99283	5.65843
MISP	8.53987	3.3121e-12	7.4561e-11	7.61267	4.88574
CMYA5	2.51416	3.48787e-12	7.84262e-11	7.93711	6.35049
FAM83E	5.44194	3.52252e-12	7.91131e-11	6.4741	4.98552
MYCT1	-7.87933	3.66589e-12	8.22371e-11	4.74173	6.20396
TENC1	2.1529	3.6907e-12	8.26975e-11	8.08597	6.61373
SHROOM2	8.93276	3.7982e-12	8.50073e-11	6.7587	4.74173
PKP2	2.64926	3.83182e-12	8.5561e-11	9.08144	7.01753
CD160	-2.39054	3.85307e-12	8.5936e-11	6.13598	7.55577
DHCR24	3.9613	3.87675e-12	8.6364e-11	10.5966	7.59533
PLEKHH1	2.56755	3.94876e-12	8.78667e-11	7.26338	5.89087
MUC3A	7.97153	4.17516e-12	9.26905e-11	7.52831	4.94575
NRK	9.77062	4.173e-12	9.26905e-11	7.06267	4.74173
ROR2	4.94796	4.3851e-12	9.72393e-11	8.03944	5.49643
PLS1	4.25692	4.40788e-12	9.76321e-11	8.97874	6.20842
AQP10	-7.44766	4.43543e-12	9.81293e-11	4.79456	6.36528
CYP27A1	3.12177	4.54987e-12	1.00546e-10	11.0431	8.17428
FGFBP2	-4.314	4.55858e-12	1.00623e-10	5.37201	7.34574
CYFIP1	2.13507	4.58882e-12	1.01175e-10	13.2647	11.1011
BCAM	7.07222	4.63026e-12	1.01972e-10	7.73336	5.05169
DCLK1	9.01563	4.65161e-12	1.02208e-10	7.46541	4.80807
EDIL3	8.99934	4.89241e-12	1.0689e-10	7.59453	4.90077
TUBA8	-2.70988	5.45534e-12	1.18919e-10	6.6763	8.57849
MFAP3L	-3.97828	5.8575e-12	1.27397e-10	5.80042	7.89041
FAM155A	8.28008	6.14617e-12	1.33525e-10	6.46561	4.74173
KIF20A	3.74973	6.17602e-12	1.34022e-10	8.03682	5.93033
CD163	3.47182	6.1851e-12	1.34069e-10	16.5622	12.7429
SDPR	-4.01329	6.24145e-12	1.35138e-10	7.03809	10.1048
C7orf63	3.23404	6.25095e-12	1.35192e-10	7.24295	5.70551
DDAH1	5.47035	6.42006e-12	1.38693e-10	7.64482	5.3124
RDH10	2.24563	6.45936e-12	1.3923e-10	9.48961	7.63919
PDLIM3	12.2506	6.48631e-12	1.39499e-10	9.00497	4.80247
HOXB6	5.8862	6.7408e-12	1.44488e-10	6.51662	4.94167
NFASC	6.58363	6.88925e-12	1.47179e-10	7.42447	5.0469
TSPAN6	4.51374	6.94446e-12	1.48031e-10	7.38749	5.44125
SNX24	2.45416	7.00047e-12	1.48895e-10	8.50935	6.78943
CHPF	3.24433	7.29211e-12	1.54927e-10	7.30711	5.70694
DOK5	8.24686	7.77415e-12	1.64987e-10	6.47677	4.74173
RAB42	3.99461	7.82584e-12	1.65901e-10	6.71082	5.27678
KIAA1549	4.16251	7.91365e-12	1.67211e-10	7.46886	5.59159
NFATC4	6.5209	7.90729e-12	1.67211e-10	6.92644	5.0042
SH3D19	3.45638	8.44866e-12	1.78124e-10	9.34928	6.87622
RPS6KA2	2.84838	8.77918e-12	1.84891e-10	9.6772	7.47017
GNLY	-3.26372	8.94227e-12	1.8812e-10	8.99676	12.369
DYRK3	4.5143	8.98446e-12	1.88801e-10	7.93804	5.53527
CXCL16	2.43522	9.07599e-12	1.90517e-10	10.0264	7.86058
PHLDA2	3.18069	9.15333e-12	1.91722e-10	7.04003	5.54188
C14orf37	6.09847	9.34585e-12	1.9533e-10	6.73773	5.01264
B3GAT1	-2.75919	9.39987e-12	1.96247e-10	5.48984	6.62562
MRAS	2.79108	9.43345e-12	1.96734e-10	8.58969	6.46663
PRKAA2	9.10233	9.51629e-12	1.98033e-10	6.8473	4.74173
COL11A1	8.93409	1.00147e-11	2.07508e-10	6.96054	4.78869
SLC5A8	24.037	1.03544e-11	2.14318e-10	6.24242	4.74173
PATL2	-2.44567	1.04515e-11	2.15863e-10	7.85342	9.99148
ITGB5	2.72673	1.06364e-11	2.19448e-10	10.7302	8.08161
ZNF503	2.36633	1.0703e-11	2.20584e-10	7.89895	6.28978
ASTN1	8.55205	1.10814e-11	2.2814e-10	6.58153	4.74173
ZBTB7C	7.08287	1.14449e-11	2.35373e-10	6.93421	4.91683
NUPR1	7.88058	1.16828e-11	2.39752e-10	6.9144	4.80807
COL4A2	4.55798	1.19029e-11	2.4401e-10	7.83643	5.57001
ENOX1	4.90732	1.21343e-11	2.48225e-10	6.45792	5.05105
KIAA1211L	4.64515	1.25107e-11	2.55654e-10	6.94803	5.27553
SOD3	7.46393	1.2855e-11	2.62132e-10	6.42646	4.79222
FAM114A1	3.24348	1.39392e-11	2.83642e-10	9.75838	7.0832
RAB3IL1	5.47241	1.42492e-11	2.89644e-10	7.74294	5.14516
RNASE1	7.39857	1.45581e-11	2.95611e-10	12.2304	6.09489
HRH1	5.01103	1.4827e-11	3.00754e-10	7.00587	5.15946
HTRA4	2.85833	1.53382e-11	3.10796e-10	7.33324	5.85681
ADM	3.20266	1.53985e-11	3.1169e-10	9.57341	6.89274
MRO	4.72968	1.65978e-11	3.35262e-10	7.06095	5.32992
DUSP4	3.79991	1.72174e-11	3.46687e-10	8.05534	5.81931
HMCN1	2.89248	1.85469e-11	3.72679e-10	8.28858	6.37407
ICA1	3.19224	1.85834e-11	3.73024e-10	9.37513	7.06006
TBX21	-2.83923	1.88062e-11	3.77103e-10	7.34949	9.97506
LEPREL1	3.13024	1.88887e-11	3.78363e-10	7.62177	5.93277
CSPG4	3.18707	2.04128e-11	4.072e-10	6.77586	5.48135
SDSL	3.03326	2.04757e-11	4.08032e-10	7.55064	5.8155
PHLDA1	2.92809	2.07279e-11	4.1263e-10	9.23609	6.88706
ADAMTS3	7.1932	2.13294e-11	4.23729e-10	6.81964	4.89745
FOSL1	3.20607	2.19653e-11	4.35464e-10	7.47807	5.75016
IGFBP3	3.85101	2.29423e-11	4.54365e-10	8.09791	5.94125
PRSS36	3.41206	2.30985e-11	4.5699e-10	6.64782	5.37211
PLEKHA7	2.74229	2.37238e-11	4.68881e-10	8.62275	6.6954
ACTN2	7.16748	2.41502e-11	4.76329e-10	6.04344	4.74173
PCDHAC2	8.5719	2.45445e-11	4.83612e-10	6.62664	4.74173
COBL	7.51222	2.48222e-11	4.88584e-10	7.46872	4.92517
VGLL3	6.44774	2.60162e-11	5.11564e-10	7.00978	4.95589
AGR2	8.97831	2.61262e-11	5.13204e-10	9.18822	5.0776
RBPMS	3.84327	2.62402e-11	5.14917e-10	9.34544	6.77282
ZC3H12C	2.11409	2.63076e-11	5.15715e-10	8.51036	6.90711
SYT7	8.62265	2.6553e-11	5.19997e-10	7.22718	4.82747
MITF	2.19502	2.69999e-11	5.28211e-10	9.75011	7.83015
TINAGL1	7.92445	2.7785e-11	5.4302e-10	6.9541	4.90182
SPSB1	3.35079	2.81842e-11	5.49706e-10	7.34456	5.66732
FERMT1	5.84995	2.84158e-11	5.53662e-10	7.43951	5.13746
GJB2	7.6447	2.93395e-11	5.70507e-10	7.17106	4.83042
B4GALT2	3.25079	2.99249e-11	5.80133e-10	7.45618	5.82155
EDN1	4.42983	2.98808e-11	5.80133e-10	8.04678	5.75034
CCR5	2.11341	2.99615e-11	5.8026e-10	8.89969	7.18995
UGDH	2.34375	3.11295e-11	6.01067e-10	10.2876	8.25346
SOX9	8.98149	3.12635e-11	6.03051e-10	8.43527	4.98116
UCHL1	6.75708	3.2005e-11	6.15506e-10	7.06999	4.85614
HSPA4L	5.39231	3.23008e-11	6.19958e-10	7.23981	5.16161
IL1RL1	3.46307	3.25473e-11	6.24067e-10	7.00998	5.48678
HTR3A	6.06637	3.26739e-11	6.25872e-10	7.53373	5.36805
CYP21A1P	3.1196	3.33331e-11	6.37863e-10	9.02359	6.7877
FGFR2	4.386	3.42736e-11	6.54516e-10	8.68664	5.94773
TFCP2L1	5.04864	3.64839e-11	6.94708e-10	8.56019	5.88571
TMPRSS4	9.4349	3.90537e-11	7.40713e-10	7.40616	4.83918
SLC22A3	5.60308	3.9376e-11	7.46092e-10	7.77603	5.24623
SDK1	3.9406	4.00842e-11	7.5802e-10	8.30253	6.02315
UPK1B	4.15881	4.02942e-11	7.61244e-10	8.76245	5.99343
CLDN4	7.62425	4.06222e-11	7.66689e-10	7.21131	4.94165
CYP27B1	2.38756	4.11118e-11	7.75171e-10	6.95173	5.77981
LIPG	8.515	4.145e-11	7.80455e-10	6.52469	4.74173
MDK	4.6845	4.15179e-11	7.80537e-10	8.51941	5.9901
VEGFA	2.86673	4.23287e-11	7.95004e-10	11.6374	9.01575
SCN1B	2.87314	4.34338e-11	8.14965e-10	7.18402	5.7826
MOXD1	4.17114	4.35011e-11	8.15434e-10	7.37798	5.4898
SEMA3F	4.64234	4.56043e-11	8.53199e-10	6.64567	5.0615
DNM1	2.30913	4.57227e-11	8.54583e-10	8.67526	6.87698
FOXP2	7.32146	4.6124e-11	8.60416e-10	7.00572	4.92144
RGS18	-3.54089	4.69041e-11	8.73277e-10	7.9924	11.1572
PCDHB13	5.82485	5.10447e-11	9.47622e-10	7.85039	5.43196
TOX3	8.47284	5.11974e-11	9.48628e-10	6.81747	4.79999
MS4A4A	3.57679	5.1996e-11	9.625e-10	10.9509	7.56604
PERP	3.51701	5.26039e-11	9.71886e-10	8.23782	6.18306
ITSN1	2.17495	5.285e-11	9.75498e-10	11.9147	9.76343
FXYD3	10.5839	5.56744e-11	1.02469e-09	7.56836	4.74173
ABCD2	-2.40514	5.64096e-11	1.03723e-09	7.46178	9.61449
BOC	3.73623	5.78682e-11	1.06303e-09	6.72789	5.35921
PDGFRL	5.93788	6.25468e-11	1.1457e-09	6.42921	4.91946
WWTR1	3.88534	6.43077e-11	1.17572e-09	7.10897	5.47346
CARD10	7.30096	6.70031e-11	1.22384e-09	7.16379	4.95435
FKBP9	3.25356	6.73936e-11	1.22864e-09	9.51507	7.07885
AMY1B	23.0672	6.73861e-11	1.22864e-09	5.99443	4.74173
CEACAM1	3.40547	7.05474e-11	1.28492e-09	9.5485	7.14489
ST8SIA6	-3.21988	7.43941e-11	1.35243e-09	5.42697	6.77022
ADAMTS7	3.95396	8.16295e-11	1.48117e-09	6.75499	5.29715
TNC	5.37194	8.43186e-11	1.52852e-09	8.36781	5.69707
PI16	-2.96134	8.46191e-11	1.53253e-09	5.51022	6.79698
MPL	-4.40365	8.65373e-11	1.5658e-09	5.33	7.11756
ASAP3	3.84106	8.69781e-11	1.57082e-09	8.0163	5.95698
CAP2	3.26224	8.76711e-11	1.58186e-09	7.47528	5.78204
KCNS3	7.99015	9.06381e-11	1.63386e-09	6.59573	4.79222
EPGN	4.65246	9.15209e-11	1.64823e-09	8.21775	5.68248
CCL24	8.08451	9.35796e-11	1.68216e-09	6.76288	4.84003
EVPL	5.2519	9.49365e-11	1.70496e-09	8.51229	5.7041
SLC46A1	2.2131	9.72891e-11	1.74559e-09	9.09212	7.2814
PON3	8.14046	1.00926e-10	1.80915e-09	7.20889	4.82896
CTTNBP2NL	2.66514	1.01553e-10	1.8187e-09	10.1058	7.65647
HIC1	2.69639	1.08017e-10	1.92909e-09	7.31698	5.92908
BNC1	9.53593	1.0843e-10	1.93468e-09	8.55303	4.83535
LSAMP	8.68796	1.10593e-10	1.96963e-09	6.6044	4.74173
HSD17B14	4.17936	1.1329e-10	2.01579e-09	7.14082	5.39876
CDC42EP4	2.04115	1.19881e-10	2.12522e-09	6.79526	5.81564
PLCE1	3.82668	1.27314e-10	2.24781e-09	8.4024	6.13969
DDR1	3.88698	1.34131e-10	2.36262e-09	9.24891	6.66609
RERG	8.18587	1.38787e-10	2.44017e-09	6.44386	4.74173
NHSL1	2.61967	1.3919e-10	2.44279e-09	9.11285	7.01379
ARSJ	5.40875	1.39178e-10	2.44279e-09	6.82363	5.13993
KANK2	3.37902	1.40669e-10	2.46651e-09	7.67394	5.81099
TRPM3	6.13528	1.43634e-10	2.51462e-09	6.50673	4.92493
MAL2	8.77206	1.43674e-10	2.51462e-09	9.65325	5.07018
NTRK2	5.21959	1.45341e-10	2.54148e-09	7.32849	5.22017
ZNF704	5.58125	1.4573e-10	2.54598e-09	7.20846	5.08605
PODN	4.32491	1.46414e-10	2.55561e-09	8.19047	5.73941
CPNE7	4.52985	1.52745e-10	2.6589e-09	6.61081	5.1131
NDNF	7.72595	1.53934e-10	2.67717e-09	7.19733	4.88669
CXCL6	7.97345	1.548e-10	2.68981e-09	6.95038	4.84356
PCYT1B	-4.66815	1.58291e-10	2.74799e-09	5.18409	6.62604
DNALI1	6.81423	1.61494e-10	2.79855e-09	7.18443	5.04403
SAA2	6.67655	1.68609e-10	2.90819e-09	6.73179	4.93169
PDZRN3	8.28534	1.71812e-10	2.95873e-09	6.44553	4.74173
CHST3	5.94315	1.94513e-10	3.33773e-09	6.42876	4.96256
NPL	2.26189	2.02818e-10	3.47405e-09	12.6189	10.341
SH3D21	2.49554	2.05394e-10	3.51505e-09	8.06228	6.42593
THBD	3.03885	2.14039e-10	3.6515e-09	10.2855	7.61595
TFAP2A	7.0871	2.17868e-10	3.71205e-09	7.08696	4.84629
DGKK	-4.75312	2.20359e-10	3.75108e-09	5.16485	6.99335
SEMA3E	6.26351	2.25062e-10	3.82241e-09	6.90058	4.9793
KLRK1	-2.73572	2.32594e-10	3.93511e-09	9.30159	12.1614
SYN1	2.99359	2.32456e-10	3.93511e-09	6.90903	5.5707
CEP55	3.22937	2.3391e-10	3.95043e-09	7.92693	5.99018
KAL1	4.97476	2.33725e-10	3.95043e-09	8.19402	5.32554
ATP10B	6.56859	2.36728e-10	3.99103e-09	7.67701	5.09066
PRUNE2	4.09809	2.39298e-10	4.03084e-09	8.17831	5.96273
WNT5A	7.30647	2.42501e-10	4.08122e-09	6.11515	4.74173
LAT	-2.10394	2.46564e-10	4.1435e-09	7.61527	9.49054
GPR176	6.56259	2.46632e-10	4.1435e-09	6.70201	4.93324
KRT5	5.18415	2.52267e-10	4.22712e-09	9.9547	6.06182
ADCY6	3.75996	2.53949e-10	4.25161e-09	7.84329	5.80119
TEAD4	6.37481	2.5604e-10	4.28289e-09	6.61845	4.83535
PTK7	3.69076	2.64112e-10	4.41026e-09	8.41701	6.26371
MAFF	3.11178	2.79402e-10	4.66154e-09	7.14599	5.63952
LONRF2	5.41227	2.84004e-10	4.73013e-09	7.05858	5.25542
NFIB	4.69897	2.93528e-10	4.88453e-09	9.15081	6.09935
PDLIM4	4.57017	2.99015e-10	4.97154e-09	6.75175	5.12062
FHAD1	3.54426	3.01495e-10	5.00845e-09	8.84333	6.53955
DCSTAMP	3.655	3.12966e-10	5.1767e-09	6.29418	5.19067
AP1M2	4.6386	3.13538e-10	5.18171e-09	7.62809	5.39013
RAPGEF5	4.52511	3.14933e-10	5.2003e-09	7.83036	5.6842
C1orf85	2.12201	3.18046e-10	5.24272e-09	10.6273	8.5754
PARM1	3.27179	3.20346e-10	5.27613e-09	9.21492	6.86257
GPRC5B	4.57924	3.27703e-10	5.38809e-09	7.40366	5.40097
TFAP2C	8.25662	3.2757e-10	5.38809e-09	6.68595	4.79222
MT1M	2.66041	3.33104e-10	5.46757e-09	6.56104	5.48742
LACC1	2.00839	3.34716e-10	5.48934e-09	8.50626	6.99969
PRSS8	3.9549	3.40492e-10	5.57459e-09	7.88259	5.92471
ARHGAP40	22.1765	3.51479e-10	5.74958e-09	5.83632	4.74173
TOP2A	3.33009	3.67062e-10	5.99431e-09	10.5875	7.81783
SMOC2	5.91053	3.73819e-10	6.08821e-09	8.02219	5.22709
PHACTR1	2.3019	3.83108e-10	6.2247e-09	9.14156	7.21391
FREM2	7.25055	3.85125e-10	6.2522e-09	7.34568	4.91567
NCAM2	5.9204	4.20622e-10	6.79982e-09	7.3035	5.29263
RHOD	8.53065	4.23239e-10	6.83639e-09	6.58171	4.74173
EPHB2	2.13329	4.39171e-10	7.08779e-09	9.33484	7.58912
SERPINB3	10.3769	4.42261e-10	7.13169e-09	7.56733	4.74173
SEMA6D	8.79703	4.43748e-10	7.14968e-09	6.62224	4.74173
ARHGAP20	3.38651	4.59704e-10	7.39634e-09	6.91463	5.47821
BAMBI	3.62028	4.59825e-10	7.39634e-09	7.52243	5.70333
HEMGN	-5.34563	4.62254e-10	7.42303e-09	6.0098	9.12502
PACSIN3	6.3599	4.68587e-10	7.51846e-09	6.79401	5.02956
FAP	5.09966	5.03117e-10	8.05238e-09	6.90557	5.18614
CH25H	5.98632	5.07574e-10	8.11698e-09	7.74853	5.26268
FBLIM1	2.61056	5.09097e-10	8.13457e-09	6.97016	5.74827
CAPN8	5.47721	5.13297e-10	8.19488e-09	7.11288	5.23689
TBC1D16	3.02537	5.19189e-10	8.27524e-09	6.98559	5.64829
CAMSAP3	4.06659	5.6304e-10	8.93722e-09	7.02284	5.43539
SELP	-3.14798	5.86705e-10	9.2899e-09	6.4532	8.70728
KITLG	5.13857	5.94777e-10	9.40227e-09	8.41278	5.48783
PTGER3	6.33917	6.0104e-10	9.49347e-09	6.67555	4.94132
TPBG	6.04585	6.13715e-10	9.68573e-09	6.57653	4.98656
RAB20	2.60693	6.28807e-10	9.91581e-09	8.43562	6.54832
ENPP1	2.46166	6.35014e-10	1.00055e-08	7.58382	6.13634
TSPAN13	2.77608	6.93737e-10	1.08862e-08	8.8061	6.84982
KIR3DX1	-3.56494	7.13208e-10	1.11645e-08	5.52871	7.064
CREG1	2.01663	7.21721e-10	1.12795e-08	8.76674	7.21349
CDC20	3.94333	7.37108e-10	1.15106e-08	7.62409	5.74029
CAPN8-2	5.32478	7.72276e-10	1.20305e-08	7.56508	5.39915
SEMA3D	4.88178	7.85398e-10	1.22053e-08	8.20786	5.56638
EMP2	3.89804	8.18317e-10	1.26964e-08	7.71768	5.75139
DZIP1	4.30068	8.19923e-10	1.27111e-08	6.37414	5.1538
SYT12	6.76261	8.28693e-10	1.28264e-08	5.88588	4.74173
SLC8A3	-4.47175	8.47507e-10	1.30861e-08	5.02558	6.18175
CCDC180	-21.6957	8.56276e-10	1.31898e-08	4.74173	5.21398
PDCD1LG2	3.95945	8.89044e-10	1.36727e-08	7.18095	5.54943
PARD6B	2.23138	9.05139e-10	1.39091e-08	8.11171	6.6439
IFITM10	2.54341	9.56341e-10	1.46725e-08	6.91822	5.71377
FZD7	3.86328	9.71287e-10	1.48781e-08	6.30995	5.06223
ACHE	8.36062	9.70918e-10	1.48781e-08	6.38119	4.79307
TBX18	7.98923	1.02703e-09	1.56822e-08	6.60977	4.78869
NR2F1	8.212	1.03744e-09	1.58285e-08	6.68869	4.79307
NDFIP2	2.8537	1.08656e-09	1.65126e-08	8.35857	6.36151
FGF7	6.09554	1.13046e-09	1.71527e-08	6.61486	4.90227
PSD3	3.44995	1.17487e-09	1.77428e-08	9.68832	6.88801
GRAP2	-2.95186	1.18045e-09	1.7813e-08	8.39776	11.2884
CCDC64B	7.24812	1.21077e-09	1.8242e-08	6.4845	4.84356
PALD1	3.16405	1.21773e-09	1.83325e-08	7.27165	5.74195
SP8	21.4797	1.2304e-09	1.85088e-08	5.62387	4.74173
HMOX1	3.34864	1.23801e-09	1.86087e-08	13.5367	10.6085
SPRY4	7.25392	1.25495e-09	1.88487e-08	6.3125	4.79307
TGFBR3	-2.30558	1.25686e-09	1.88627e-08	10.3369	12.7123
CDS1	4.10111	1.27203e-09	1.90755e-08	7.46498	5.64964
ZMYND15	2.47761	1.29334e-09	1.93499e-08	7.95339	6.32746
KHDRBS3	4.00721	1.30364e-09	1.94889e-08	6.95864	5.38834
GPR39	8.07174	1.31962e-09	1.97125e-08	6.31385	4.74173
TPD52L1	5.21135	1.32818e-09	1.9825e-08	6.81357	5.08841
PRRX1	8.63799	1.37117e-09	2.04349e-08	6.54643	4.74173
TRIM47	3.03775	1.3871e-09	2.06564e-08	7.38317	5.86154
ESYT3	5.1116	1.4156e-09	2.10646e-08	6.98883	5.25438
MAP3K7CL	-3.37881	1.42979e-09	2.1243e-08	6.55821	8.75077
GNA11	2.18054	1.43091e-09	2.12432e-08	7.71349	6.3327
TMEM26	7.80282	1.44861e-09	2.14894e-08	6.43196	4.78869
NPAS2	2.90084	1.45798e-09	2.16117e-08	9.03046	6.81692
HSPA1B	2.7712	1.46169e-09	2.16501e-08	14.1248	11.1638
CAV2	4.37893	1.48714e-09	2.20102e-08	6.93695	5.32426
KIT	3.73516	1.49703e-09	2.21394e-08	8.76637	6.54829
HHLA2	5.70353	1.50732e-09	2.22746e-08	7.99149	5.74726
GABRB2	6.01096	1.53474e-09	2.26624e-08	6.68963	4.90455
SIT1	-2.18836	1.55333e-09	2.29018e-08	5.65533	6.63093
CFTR	7.3119	1.55281e-09	2.29018e-08	6.30284	4.79307
KLRG1	-2.67447	1.55875e-09	2.29641e-08	7.013	9.2981
CNRIP1	3.76139	1.58158e-09	2.32827e-08	6.49425	5.21348
MSLN	8.29613	1.58843e-09	2.33656e-08	8.89229	5.1445
PTMS	2.07362	1.59869e-09	2.34987e-08	10.5175	8.60854
SERF1A	21.3294	1.60207e-09	2.35304e-08	5.74004	4.74173
DGKG	-2.15461	1.64098e-09	2.40469e-08	6.93201	8.51681
KLRD1	-2.62936	1.68451e-09	2.46099e-08	8.00915	10.6769
DKK3	3.10295	1.68389e-09	2.46099e-08	7.41151	5.80662
SFTPB	7.86828	1.69804e-09	2.47888e-08	7.71796	5.27419
WFS1	2.42849	1.82698e-09	2.65504e-08	8.65526	6.93171
GCNT3	9.72173	1.87593e-09	2.72003e-08	7.98928	4.82747
TSPAN8	10.9159	1.897e-09	2.74851e-08	7.96839	4.79222
IRF6	4.2948	1.93553e-09	2.79531e-08	8.24741	5.89435
WT1-AS	8.00614	1.99827e-09	2.87793e-08	6.49	4.78869
CCDC40	4.28416	2.00314e-09	2.88063e-08	7.57755	5.68227
SMO	4.84949	2.00255e-09	2.88063e-08	6.07254	4.94664
WDR72	4.57583	2.00889e-09	2.88675e-08	7.52137	5.57749
TTC23	2.80328	2.03251e-09	2.91634e-08	7.08318	5.7545
DNM3	-3.03672	2.03568e-09	2.91654e-08	7.25281	9.5737
FLNB	2.02706	2.03496e-09	2.91654e-08	13.0205	11.1267
ST14	2.16865	2.08322e-09	2.98023e-08	12.4401	10.3018
CCL23	4.36908	2.1014e-09	3.004e-08	6.81589	5.17712
SLC7A2	8.57784	2.11353e-09	3.01911e-08	7.47637	4.90786
FST	5.88874	2.16469e-09	3.08761e-08	6.72051	4.92592
CYP21A2	4.31762	2.18082e-09	3.10831e-08	8.59616	5.78784
ANXA8	5.82085	2.29423e-09	3.26512e-08	10.9446	6.52212
MIPOL1	5.14036	2.30831e-09	3.28032e-08	7.10451	5.27316
S100A13	2.49073	2.35274e-09	3.33608e-08	7.56869	6.10684
BDKRB1	7.13667	2.35669e-09	3.33922e-08	5.97998	4.74173
CTSW	-2.3198	2.37e-09	3.35562e-08	9.0899	11.5148
H1F0	2.44158	2.38804e-09	3.37867e-08	11.4402	9.25109
TSPAN3	2.22286	2.42239e-09	3.42475e-08	10.7771	8.90876
IL18	2.20078	2.44528e-09	3.45292e-08	9.5951	7.64798
MYCL	-2.08025	2.53142e-09	3.57104e-08	6.42299	7.84149
PAQR5	7.56386	2.54129e-09	3.58235e-08	6.34735	4.79222
NEDD4L	2.98881	2.55244e-09	3.59544e-08	10.0368	7.7483
HES1	3.59448	2.59294e-09	3.64981e-08	6.75572	5.36137
GNG11	-4.09969	2.67245e-09	3.74805e-08	5.57627	7.55954
MEST	2.43971	2.68508e-09	3.75782e-08	9.04326	7.209
TSPAN1	8.35692	2.69606e-09	3.77019e-08	8.73478	5.10965
CDK1	3.53015	2.71242e-09	3.79031e-08	7.95363	5.8926
MAFB	2.14486	2.80718e-09	3.91704e-08	11.104	8.96068
B3GNT5	3.00195	2.8322e-09	3.94909e-08	9.09586	6.76271
ME1	3.07983	2.98039e-09	4.15272e-08	9.16784	6.95618
RRAD	3.72331	3.01344e-09	4.19574e-08	6.43366	5.16524
CCNB1	2.8932	3.02995e-09	4.21263e-08	8.42856	6.59417
SRD5A3	2.35129	3.10057e-09	4.30461e-08	9.0903	7.29367
CAMK2A	5.70792	3.11883e-09	4.32684e-08	5.70145	4.79999
KIR2DS4	-4.09845	3.16372e-09	4.37651e-08	6.23385	9.04974
CXCR2P1	-3.11466	3.18517e-09	4.40303e-08	5.91687	7.59432
PCDHA12	8.7898	3.18856e-09	4.40455e-08	7.03844	4.84696
MLC1	-2.15633	3.21628e-09	4.43649e-08	6.85488	8.57682
TARP	-2.82029	3.45145e-09	4.74728e-08	9.25161	12.207
MPZL1	2.39562	3.59767e-09	4.94135e-08	9.38944	7.47129
RND1	3.18484	3.62448e-09	4.97463e-08	6.51913	5.33597
GOLM1	2.57911	3.70536e-09	5.0748e-08	10.8561	8.63701
FAM83A	4.81239	3.70455e-09	5.0748e-08	6.75793	5.23247
A2M	2.72043	3.76796e-09	5.14815e-08	13.3599	11.0307
FUT6	5.44513	3.76961e-09	5.14815e-08	6.86195	5.13917
CLEC5A	4.24988	4.00231e-09	5.4428e-08	8.54143	6.08654
UNC5B	4.26478	4.23691e-09	5.75777e-08	7.35636	5.3693
ACE	2.49712	4.27276e-09	5.8024e-08	10.0226	7.71265
TPX2	3.01757	4.31392e-09	5.85006e-08	8.99255	6.8624
NPHS1	4.68854	4.47159e-09	6.05109e-08	7.12216	5.38916
SCN4B	4.42049	4.5221e-09	6.11515e-08	7.43764	5.3906
CYP2B7P	4.76965	4.58228e-09	6.19218e-08	7.4955	5.57836
CXCL2	4.3245	4.64912e-09	6.26932e-08	9.10278	6.01366
SLC29A1	2.588	4.75778e-09	6.41136e-08	10.5149	8.33661
TEAD2	3.65918	4.76471e-09	6.4162e-08	7.43267	5.67101
NYNRIN	3.63054	4.7977e-09	6.45162e-08	8.45705	6.01298
NPC2	2.127	4.89126e-09	6.55912e-08	13.6034	11.4768
FUT7	-2.60461	4.90673e-09	6.5753e-08	6.67048	8.61808
ADH1C	8.10178	4.98788e-09	6.67939e-08	6.33684	4.74173
SORBS2	6.4191	5.24242e-09	7.01538e-08	8.67486	5.47759
RNF180	7.10541	5.50234e-09	7.3479e-08	5.95695	4.74173
SHANK3	3.28136	5.51764e-09	7.35899e-08	6.39788	5.30522
PCDHA4	7.50271	5.51829e-09	7.35899e-08	6.12155	4.74173
RAMP1	3.62461	5.52328e-09	7.36056e-08	6.72021	5.38418
IQCJ-SCHIP1	5.19994	5.75406e-09	7.65222e-08	6.33237	4.90102
AK4	2.22825	5.76975e-09	7.6678e-08	7.80004	6.38303
GDF5	7.35451	5.78332e-09	7.67525e-08	6.22584	4.79999
LARP6	6.96628	5.94255e-09	7.88114e-08	6.16078	4.78869
BMP4	6.00767	6.03159e-09	7.99373e-08	6.98179	5.00309
XAGE1B	10.7082	6.04303e-09	8.00338e-08	9.50728	5.15399
PKHD1	7.47123	6.0922e-09	8.06295e-08	6.31412	4.79222
SPAG17	4.51651	6.17869e-09	8.16402e-08	7.51824	5.57611
HSPA12A	7.30023	6.50741e-09	8.58301e-08	6.27483	4.78869
SLC6A4	-2.76696	6.54368e-09	8.61906e-08	5.48781	6.60116
FSTL1	3.39289	6.80633e-09	8.94056e-08	10.3642	7.49509
FAM83B	5.25571	6.91043e-09	9.06495e-08	6.60919	5.07954
SLC25A10	2.5675	6.92416e-09	9.07677e-08	7.07824	5.84319
CTNNAL1	2.43579	7.53506e-09	9.83551e-08	9.18459	7.22622
FCGR2B	2.83046	7.53869e-09	9.83551e-08	12.6445	9.85635
JPH1	7.88066	7.58532e-09	9.88966e-08	7.01069	4.82896
TRIP13	3.5353	7.82237e-09	1.01712e-07	7.36049	5.63311
LAMC1	3.11169	7.82964e-09	1.01738e-07	11.1646	8.43603
ANKS1B	6.73273	7.90817e-09	1.02482e-07	6.51708	4.95904
CXCL17	5.64513	8.12024e-09	1.04948e-07	7.34921	5.31233
TK1	2.19946	8.2212e-09	1.06181e-07	6.83637	5.77769
MAOB	2.83608	8.46678e-09	1.09134e-07	7.61239	6.04239
AZGP1	8.10025	8.80668e-09	1.13212e-07	6.23791	4.74173
ALPK3	4.5218	8.89102e-09	1.1422e-07	7.66423	5.81297
OLFML3	3.13019	8.93362e-09	1.14691e-07	6.32815	5.2972
TMEM54	7.21278	9.19809e-09	1.17851e-07	6.21438	4.79222
FUCA1	2.35804	1.00705e-08	1.286e-07	11.3955	9.34249
HPGDS	4.49189	1.02e-08	1.30168e-07	6.88338	5.20076
DNAH5	9.60537	1.02431e-08	1.30545e-07	9.09118	4.96745
VMO1	3.57201	1.04594e-08	1.33127e-07	7.68412	5.66341
CDC42BPA	3.30162	1.06509e-08	1.35473e-07	10.4248	7.71115
IBSP	8.06381	1.06628e-08	1.35535e-07	6.43573	4.78869
SLC14A1	-3.1287	1.07859e-08	1.3692e-07	6.28243	8.3614
MAP1B	4.55125	1.08351e-08	1.37454e-07	10.039	7.31615
CCDC68	3.79696	1.08487e-08	1.37473e-07	6.83918	5.33703
FMO1	7.74704	1.0858e-08	1.37473e-07	6.38221	4.79307
LRRN3	-2.46294	1.10792e-08	1.40089e-07	6.87749	8.55896
FAM101A	3.88908	1.14282e-08	1.44124e-07	6.41598	5.16733
TNFSF18	5.86521	1.14766e-08	1.4464e-07	6.32125	4.87423
IQCK	2.44535	1.15755e-08	1.45791e-07	7.58637	6.18242
SLAMF8	3.15565	1.15842e-08	1.45806e-07	8.78239	6.41719
MGP	4.31834	1.16161e-08	1.46016e-07	7.9159	5.67194
LPHN2	8.01917	1.19711e-08	1.50087e-07	8.56531	4.91503
GFPT2	3.80791	1.19942e-08	1.50278e-07	8.41737	5.89272
CDH17	7.8431	1.20598e-08	1.50904e-07	7.22768	5.03218
BCAS1	3.8834	1.20872e-08	1.51149e-07	8.19608	6.01849
VSTM2L	9.19041	1.21782e-08	1.52187e-07	6.51263	4.74173
SMPDL3B	3.9273	1.22611e-08	1.53125e-07	7.29344	5.65997
TMC4	2.37785	1.23033e-08	1.53553e-07	7.83826	6.39012
CYP39A1	8.24183	1.27731e-08	1.59209e-07	6.32634	4.74173
ZFPM2	4.7545	1.29323e-08	1.60986e-07	8.81544	5.66987
FAM188B	2.1848	1.33719e-08	1.66136e-07	7.88358	6.46693
DMBT1	10.0026	1.34128e-08	1.66429e-07	8.89888	4.96374
RP11-473M20.7	-2.3122	1.36012e-08	1.68442e-07	5.97591	7.21816
SDS	3.25102	1.36413e-08	1.6883e-07	6.75027	5.47704
ILDR2	3.67567	1.40474e-08	1.73633e-07	6.58041	5.28536
MAOA	4.97673	1.4256e-08	1.75985e-07	9.68145	6.25033
CHMP4C	5.56531	1.43953e-08	1.77478e-07	6.92967	5.05685
NSUN7	3.41232	1.45252e-08	1.78851e-07	7.08017	5.56549
GPR115	7.33898	1.50747e-08	1.85261e-07	6.5248	4.81424
EMILIN1	2.72836	1.51112e-08	1.85591e-07	6.76024	5.6196
SOWAHB	9.0487	1.52714e-08	1.8732e-07	6.54895	4.79307
MICALL2	2.59501	1.53812e-08	1.88427e-07	7.8517	6.31697
LMO7	2.73162	1.55418e-08	1.90274e-07	12.3783	10.1373
SPR	2.98785	1.55934e-08	1.90784e-07	6.77357	5.52914
INTU	3.52421	1.65774e-08	2.02437e-07	7.24588	5.60311
PITX1	5.62748	1.70026e-08	2.07105e-07	7.14061	5.09532
MECOM	5.21018	1.74855e-08	2.12718e-07	7.46703	5.37365
FOLR1	6.56765	1.84082e-08	2.22818e-07	6.7665	5.06489
ANGPTL4	3.76475	1.85084e-08	2.23739e-07	7.14785	5.59057
TTC39A	4.54415	1.85191e-08	2.23739e-07	7.17984	5.46014
GRIA2	8.24681	1.85998e-08	2.24572e-07	8.43599	4.96714
ADRA1A	4.26164	1.86899e-08	2.2552e-07	6.68213	5.29831
MUC5AC	9.61311	1.93243e-08	2.32882e-07	9.509	5.71739
PLEKHG4B	5.12538	1.94272e-08	2.33977e-07	6.97189	5.32261
CCL7	6.28839	2.06957e-08	2.48322e-07	6.33121	4.85856
SAMD4A	3.58494	2.16253e-08	2.59315e-07	9.31294	7.0597
SNAI2	7.3436	2.17393e-08	2.6052e-07	6.52563	4.80807
RASGEF1B	2.39629	2.2188e-08	2.65402e-07	12.184	9.59188
PALMD	6.06139	2.28082e-08	2.72314e-07	6.52734	5.00401
MUC5B	6.42086	2.36125e-08	2.81393e-07	12.4761	8.85431
SLC1A3	3.67031	2.36753e-08	2.81925e-07	10.0108	6.79792
RNF148	7.20874	2.36863e-08	2.81925e-07	5.97545	4.74173
EPHX3	3.76768	2.37216e-08	2.8217e-07	6.31083	5.21479
RIPK4	5.46967	2.37749e-08	2.82629e-07	6.8488	5.05883
DMRTA1	8.42027	2.40034e-08	2.8517e-07	6.24218	4.74173
C3orf52	3.72459	2.41484e-08	2.86716e-07	6.79769	5.35879
HS6ST2	9.03705	2.44738e-08	2.90043e-07	6.46944	4.74173
PCDHB11	5.93642	2.4555e-08	2.90826e-07	7.05357	5.10343
ZNF462	3.3075	2.47319e-08	2.92506e-07	9.56243	6.98653
PLK1	2.60511	2.50414e-08	2.95679e-07	7.95116	6.33832
DSC2	2.24928	2.64132e-08	3.11304e-07	12.2868	9.93827
HP	3.96846	2.66712e-08	3.1386e-07	13.3536	9.13271
EFR3B	5.42	2.67183e-08	3.13998e-07	6.8977	5.22831
LY6G6E	-6.80947	2.71697e-08	3.18431e-07	4.74173	5.78461
ETV1	4.62321	2.71832e-08	3.18431e-07	6.85112	5.22426
IDO1	3.98906	2.73602e-08	3.20116e-07	7.76161	5.83451
MMP7	10.9958	2.75768e-08	3.22454e-07	8.04145	4.91122
VEGFC	3.48543	2.78092e-08	3.24783e-07	7.30228	5.65959
ADRA2B	3.49451	2.78265e-08	3.24783e-07	6.23271	5.18905
CENPA	3.69796	2.78119e-08	3.24783e-07	6.34432	5.1703
SMAD9	4.57265	2.79442e-08	3.25882e-07	6.41005	5.04484
DNAH14	2.42664	2.83913e-08	3.30574e-07	8.3107	6.67411
AADAT	4.04457	2.90159e-08	3.37439e-07	6.25622	5.13744
GAS1	4.84165	2.91035e-08	3.38253e-07	6.66015	5.13296
DNAJC12	5.16722	2.95727e-08	3.43293e-07	6.41676	4.99516
IRX5	6.25711	2.99093e-08	3.46782e-07	6.23347	4.87444
LRP4	5.44131	2.99869e-08	3.47473e-07	6.65476	4.94483
KLK13	6.59397	3.04655e-08	3.52172e-07	6.00426	4.80247
PODXL	3.10248	3.0564e-08	3.53098e-07	8.69043	6.69789
INMT	4.44491	3.08203e-08	3.55633e-07	7.00253	5.19172
RABL5	2.22569	3.13208e-08	3.6076e-07	7.18998	6.01361
CRTAC1	6.56022	3.20484e-08	3.68264e-07	5.80411	4.74173
BCAT1	2.31481	3.26178e-08	3.7458e-07	10.3637	8.12747
PYCR1	4.31704	3.32945e-08	3.82123e-07	7.78929	5.67645
NAPSA	5.86123	3.34779e-08	3.83977e-07	8.80984	6.10287
SIGLEC11	2.6127	3.37315e-08	3.85989e-07	9.54668	7.18952
CIT	2.11881	3.50971e-08	4.01139e-07	8.99062	7.29663
DUOX2	8.63555	3.59231e-08	4.09851e-07	7.16904	4.96001
ARNTL2	2.34752	3.65676e-08	4.16957e-07	7.74379	6.28738
CNKSR3	5.207	3.66521e-08	4.17674e-07	7.63698	5.22508
PCDHA7	7.76205	3.67222e-08	4.18225e-07	6.16998	4.74173
PGA5	3.93762	3.70483e-08	4.2169e-07	9.13549	6.26903
C11orf96	4.89144	3.70948e-08	4.21969e-07	6.79527	5.13355
SEC14L6	5.12333	3.74118e-08	4.24824e-07	6.04285	4.95126
ABHD17C	2.45778	3.79668e-08	4.30365e-07	7.53339	6.10069
LGSN	6.57398	3.82891e-08	4.33253e-07	6.91454	5.09801
LGR5	6.53216	3.91987e-08	4.43026e-07	5.94585	4.79307
SMPDL3A	2.23293	3.92468e-08	4.43049e-07	10.3605	8.46425
LY6K	7.49782	3.96494e-08	4.47332e-07	6.38311	4.82747
XIRP2	-6.45399	4.02234e-08	4.53278e-07	4.74173	5.68753
CDC25C	2.98421	4.0649e-08	4.57806e-07	6.22184	5.29593
ARHGAP8	4.77258	4.09557e-08	4.6099e-07	6.47195	5.08041
NOTCH3	4.79856	4.3564e-08	4.89492e-07	8.06366	5.63362
ERN2	6.26365	4.35907e-08	4.89507e-07	6.71078	5.02784
PRSS48	6.96098	4.4412e-08	4.98439e-07	6.04929	4.79307
LOC642131	-2.29935	4.44802e-08	4.98913e-07	6.31386	7.93638
TTC6	8.53745	4.46196e-08	5.00186e-07	6.5353	4.80247
PZP	-2.31293	4.48593e-08	5.02581e-07	7.78248	9.93401
RAET1G	4.65877	4.62169e-08	5.1719e-07	6.27418	5.05884
SFTA2	10.0091	4.65422e-08	5.20527e-07	7.22383	4.74173
ZNF165	2.66774	4.67484e-08	5.22227e-07	7.22801	5.89613
VWA2	5.84222	4.70773e-08	5.25292e-07	6.92713	5.1672
CXCL3	4.57821	4.80986e-08	5.35758e-07	7.73824	5.43106
TSPAN4	2.14783	4.87562e-08	5.41205e-07	8.882	7.27912
PLK2	2.88476	4.8875e-08	5.42212e-07	10.3728	7.51557
AK5	-2.80085	4.89554e-08	5.42479e-07	6.50525	8.74137
SIGLEC17P	-2.04539	4.89847e-08	5.42491e-07	6.11524	7.29304
SPARCL1	4.08597	4.91098e-08	5.43564e-07	6.67511	5.26901
PCDHB14	5.4234	4.92353e-08	5.44641e-07	7.16631	5.25056
PPP2R3A	2.26722	4.95086e-08	5.47036e-07	8.26075	6.72152
PDE5A	-2.97849	4.9999e-08	5.51822e-07	7.47416	9.70807
LRP11	2.96833	5.0182e-08	5.53524e-07	7.95159	6.21329
PDZD4	-2.69406	5.10585e-08	5.6287e-07	7.08314	9.51627
LYNX1	3.07721	5.25752e-08	5.78597e-07	7.2618	5.70677
BUB1B	2.62734	5.30592e-08	5.83258e-07	9.2085	7.20213
KLRC4	-2.41482	5.45048e-08	5.98466e-07	8.20476	10.5277
LOC100996760	8.53712	5.45636e-08	5.9877e-07	6.75427	4.78869
GZMB	-2.91873	5.58501e-08	6.1219e-07	8.39102	11.3034
PLEKHS1	5.97796	5.6048e-08	6.14011e-07	7.27987	5.11004
LINC00987	-2.04409	5.69491e-08	6.22821e-07	6.04005	7.17297
CTSE	7.43089	5.82312e-08	6.3648e-07	8.41709	5.06243
SLC25A27	2.46315	5.85406e-08	6.395e-07	7.10789	5.85739
CXCL14	6.25382	5.86429e-08	6.40255e-07	6.45138	4.96538
A2M-AS1	-2.55057	6.0639e-08	6.60924e-07	5.69497	6.95365
WNK4	2.22203	6.11921e-08	6.66575e-07	7.47236	6.21641
PPARG	3.95921	6.17705e-08	6.71358e-07	9.30941	6.19109
PRDM16	4.58425	6.33632e-08	6.87892e-07	6.81896	5.30339
VTN	2.37687	6.38495e-08	6.92392e-07	6.82521	5.78264
LOC100996433	3.72943	6.49785e-08	7.03842e-07	6.00453	5.00721
GATA4	5.8176	6.6118e-08	7.15382e-07	6.30718	4.88364
CBLC	6.70524	6.8615e-08	7.40319e-07	6.2372	4.84356
TNFSF15	2.96522	7.2273e-08	7.76743e-07	6.20583	5.27676
LPHN3	5.61045	7.32174e-08	7.85698e-07	6.06301	4.82289
BRINP2	7.65391	7.49344e-08	8.02214e-07	6.27518	4.78869
KIAA1462	3.3122	7.5303e-08	8.05266e-07	6.88426	5.50857
TNFAIP8L3	4.18031	7.71263e-08	8.22572e-07	6.24992	5.08197
PCDHB7	8.09107	7.7927e-08	8.30101e-07	6.28121	4.74173
NUGGC	-2.31761	7.84315e-08	8.34553e-07	6.66063	8.34582
NEURL1	-2.11589	8.03793e-08	8.52924e-07	5.84694	6.92408
ENHO	2.52182	8.07244e-08	8.56114e-07	6.60015	5.56041
IGFBP1	8.66607	8.13109e-08	8.61386e-07	6.41659	4.74173
CD247	-2.28369	8.35991e-08	8.82715e-07	10.2362	12.7595
BRINP1	6.32129	8.37668e-08	8.84001e-07	5.72935	4.74173
CLDN10	6.94841	8.43607e-08	8.89781e-07	6.44231	4.87881
FAM213A	2.09304	8.45527e-08	8.90693e-07	7.9237	6.55033
TNS1	3.36098	8.46781e-08	8.91178e-07	11.2865	7.95908
ID3	2.60919	8.64134e-08	9.08449e-07	7.21699	5.82944
KIF4A	3.33919	8.67034e-08	9.11001e-07	8.94346	6.68997
UNC5C	5.59614	9.04894e-08	9.4768e-07	6.24937	4.93072
MAPK10	3.51371	9.19654e-08	9.6157e-07	6.50228	5.31756
RTKN	3.28762	9.24567e-08	9.65659e-07	7.22011	5.72097
OVOL1	6.62409	9.2655e-08	9.67205e-07	5.97076	4.80247
TRIM2	2.43132	9.4634e-08	9.85996e-07	7.75079	6.29572
CAPN13	7.16695	9.46597e-08	9.85996e-07	5.98316	4.74173
LOC101928044	-2.05935	1.02203e-07	1.06152e-06	5.47056	6.21264
FRMD6	3.04362	1.03283e-07	1.07003e-06	7.05945	5.63577
DAW1	4.43347	1.03341e-07	1.07006e-06	6.52328	5.14725
ID1	3.69939	1.05867e-07	1.09387e-06	7.41686	5.51714
CDKL2	4.87843	1.07602e-07	1.11e-06	6.89936	5.3881
ADAMTSL1	7.15872	1.08731e-07	1.12046e-06	5.93334	4.74173
ITGA11	5.52046	1.11104e-07	1.14429e-06	6.04951	4.87881
NOV	4.39183	1.12934e-07	1.1619e-06	6.58795	5.18433
SALL4	3.49587	1.13343e-07	1.16548e-06	6.18497	5.13295
SCARA3	7.75172	1.13724e-07	1.16831e-06	6.13708	4.74173
COL22A1	7.44658	1.15459e-07	1.18432e-06	6.06357	4.74173
KLK10	8.8153	1.18387e-07	1.21218e-06	6.35416	4.74173
IL1RL2	3.4414	1.18698e-07	1.21471e-06	6.29504	5.17545
SERPINB7	6.89596	1.20631e-07	1.23319e-06	6.31351	4.80807
FAM171B	2.48913	1.20714e-07	1.23339e-06	6.88016	5.77087
ANKRD29	5.41198	1.21331e-07	1.23903e-06	6.09187	4.87939
GPR37	7.06999	1.2325e-07	1.2553e-06	6.08674	4.78869
SERPINA3	8.73362	1.32665e-07	1.34692e-06	6.37095	4.74173
LIM2	-3.93214	1.3309e-07	1.35052e-06	5.09775	6.33818
BTG3	2.55365	1.33302e-07	1.35196e-06	9.07188	7.29931
PPP1R3C	6.42413	1.34772e-07	1.36544e-06	5.92265	4.80247
ANGPT1	-3.61599	1.37875e-07	1.39394e-06	5.4155	6.99242
LINC00937	-2.48102	1.39786e-07	1.4103e-06	5.87893	7.23467
CCDC8	4.21864	1.3992e-07	1.41091e-06	6.42973	5.18287
MYOF	2.31818	1.40793e-07	1.41897e-06	13.7148	11.2188
CXCR1	-3.08015	1.45469e-07	1.46228e-06	5.3054	6.37419
PALM	5.14819	1.48691e-07	1.49078e-06	6.13062	4.98218
DLGAP5	3.2284	1.50379e-07	1.50692e-06	8.32402	6.36946
CENPF	3.04633	1.53247e-07	1.53486e-06	9.85752	7.5989
PNPLA1	-2.29194	1.54037e-07	1.53952e-06	5.33506	6.09682
GSDMC	4.74257	1.55683e-07	1.5536e-06	6.32691	5.13119
SCML4	-2.36705	1.57158e-07	1.56508e-06	8.04169	10.3494
CACNA1G	5.85026	1.60341e-07	1.59431e-06	5.58649	4.74173
KRT14	7.35794	1.644e-07	1.63298e-06	5.98304	4.74173
PYHIN1	-2.25711	1.67468e-07	1.66175e-06	8.79703	11.1745
LRG1	2.68221	1.69972e-07	1.68572e-06	7.92361	6.16962
COL5A2	3.83279	1.72752e-07	1.71065e-06	11.3124	7.2107
C6orf165	5.63744	1.73407e-07	1.71626e-06	6.06361	4.95819
CPS1	6.81228	1.75097e-07	1.73032e-06	9.36899	6.51238
MT1H	4.42026	1.84156e-07	1.81518e-06	6.49638	5.05069
KCNJ5	3.12497	1.84324e-07	1.81591e-06	7.04316	5.71803
NMU	6.82965	1.86192e-07	1.83244e-06	6.5624	4.87338
HCN1	6.87559	1.87591e-07	1.84526e-06	6.0526	4.78869
SH2D1B	-2.65619	1.92068e-07	1.88353e-06	5.83782	7.24857
KAZN	4.72519	1.92999e-07	1.8917e-06	6.45868	5.0999
SAMD14	-2.92648	2.00536e-07	1.9606e-06	5.26287	6.16321
KCNMA1	3.76182	2.03107e-07	1.98271e-06	10.9644	7.49218
NXN	3.05193	2.05573e-07	2.00273e-06	6.58091	5.47572
C1orf51	3.51919	2.06098e-07	2.00683e-06	6.74473	5.45965
DTHD1	-2.44392	2.06594e-07	2.00979e-06	6.96295	9.01966
ARHGAP42	2.81378	2.06611e-07	2.00979e-06	8.38132	6.68874
KIR2DL3	-2.96011	2.0795e-07	2.02078e-06	6.68747	9.10248
ANO1	9.72965	2.08132e-07	2.02152e-06	6.84063	4.74173
SAMD3	-2.29367	2.13678e-07	2.06914e-06	8.26114	10.5668
FAM19A1	-3.97855	2.14603e-07	2.07705e-06	5.06204	6.18444
MAP6	6.59879	2.16048e-07	2.08998e-06	6.2058	4.8612
MS4A1	-2.3096	2.19721e-07	2.12231e-06	9.51545	12.0036
SLC4A3	2.10985	2.21766e-07	2.13993e-06	6.88649	5.87798
BARX2	8.72555	2.29282e-07	2.20143e-06	6.40238	4.80247
SLC16A9	6.865	2.30648e-07	2.21234e-06	6.27615	4.80807
ALDH3A1	8.115	2.30864e-07	2.21331e-06	6.22603	4.78869
PARD3B	2.89183	2.38195e-07	2.27906e-06	8.12339	6.42352
CLIC6	7.20543	2.43354e-07	2.3261e-06	7.73299	5.29622
GLIS3	2.88849	2.44731e-07	2.33695e-06	8.81993	6.93026
DLGAP1	3.23076	2.49127e-07	2.37657e-06	6.65826	5.35491
GRIA4	4.70484	2.53969e-07	2.41917e-06	6.39145	5.08658
RNF128	8.94359	2.70167e-07	2.57092e-06	7.02947	4.82747
KLRC4-KLRK1	-2.52236	2.76473e-07	2.62574e-06	8.12153	10.5756
OGN	2.45579	2.7686e-07	2.62813e-06	8.13691	6.50211
MMP13	7.27789	2.77455e-07	2.63248e-06	5.98026	4.74173
VANGL2	7.36971	2.90306e-07	2.74494e-06	6.66592	4.87338
TMEM125	6.53279	2.96635e-07	2.79655e-06	5.74831	4.74173
GPT2	2.07097	2.97985e-07	2.80791e-06	6.95685	5.9456
LOC200772	-6.08406	2.98325e-07	2.80974e-06	4.74173	5.57145
NCKAP5	3.63691	2.98798e-07	2.81282e-06	7.02241	5.53552
ARHGAP22	2.11209	3.06256e-07	2.87741e-06	8.26583	6.72808
ZSCAN31	4.19342	3.09407e-07	2.90417e-06	7.13499	5.58336
C11orf52	8.31536	3.10397e-07	2.91205e-06	6.48159	4.79222
TRAPPC3L	-5.61431	3.13009e-07	2.93227e-06	4.88243	6.0109
FBXL7	6.73881	3.17615e-07	2.97253e-06	5.83628	4.74173
SPIRE2	3.02723	3.2067e-07	2.99821e-06	6.95026	5.66691
ULBP2	2.28426	3.31887e-07	3.09707e-06	7.0141	5.75601
TCN2	2.15779	3.34737e-07	3.11764e-06	10.8237	8.69273
DKK1	7.06341	3.41457e-07	3.17562e-06	6.24211	4.83918
KIF18B	2.90424	3.50526e-07	3.25682e-06	6.65304	5.50773
MORN2	2.27087	3.57658e-07	3.31828e-06	7.31727	6.12803
ABCA4	6.59215	3.57573e-07	3.31828e-06	6.67269	4.98104
GP5	-2.56087	3.58063e-07	3.32044e-06	5.52583	6.66745
PPP1R1B	5.18345	3.5875e-07	3.32361e-06	6.24326	4.9829
ARHGEF17	3.37291	3.64896e-07	3.37568e-06	8.34422	6.14166
SERPINE2	2.44464	3.6681e-07	3.39176e-06	8.37992	6.71665
AOC1	7.13094	3.70505e-07	3.42264e-06	6.03789	4.79307
GNAI1	2.73497	3.73496e-07	3.44862e-06	7.18454	5.85585
VWA1	7.52821	3.73954e-07	3.45119e-06	6.01154	4.74173
OCLN	5.52598	3.7537e-07	3.46261e-06	10.7992	7.18805
TRIM36	2.12996	3.82418e-07	3.51751e-06	7.24175	6.06562
COL15A1	5.81995	4.04225e-07	3.71101e-06	6.77922	5.09887
CMTM2	-3.01912	4.08241e-07	3.74075e-06	5.38239	6.35545
FNDC4	5.76361	4.19353e-07	3.83346e-06	6.2078	4.87939
PDE1C	6.075	4.19344e-07	3.83346e-06	6.4799	4.90102
B3GNT3	5.25889	4.32557e-07	3.9448e-06	6.31858	4.94811
ALDH1L1	7.8979	4.36206e-07	3.9762e-06	6.14334	4.74173
APOD	8.34017	4.39004e-07	3.99981e-06	6.84623	4.8803
TRABD2B	6.28694	4.3934e-07	4.00098e-06	5.70926	4.74173
MGARP	4.23544	4.41535e-07	4.01907e-06	6.57085	5.19551
CCL4L1	3.52728	4.42401e-07	4.02506e-06	10.6239	7.63091
HMMR	2.8307	4.43654e-07	4.03455e-06	7.72561	6.14841
KCNT2	5.28405	4.46984e-07	4.06292e-06	6.84992	5.04905
SNX7	4.67333	4.47847e-07	4.06721e-06	8.00279	5.41614
ABCA9	2.13572	4.54559e-07	4.12399e-06	7.12831	6.01225
FGG	9.14671	4.83778e-07	4.37672e-06	7.07427	4.86073
NLRP12	-2.1598	4.87953e-07	4.40827e-06	8.86562	11.0022
HEPH	5.91679	4.87778e-07	4.40827e-06	6.38953	4.9944
SMTNL2	7.0087	4.88609e-07	4.41214e-06	6.07523	4.79222
TNS4	4.73672	4.89459e-07	4.41567e-06	6.48476	5.20017
TMPRSS2	10.2707	4.9539e-07	4.46709e-06	7.71733	4.89649
PITPNM3	3.29479	4.96052e-07	4.47096e-06	6.94849	5.53669
SULT1C2	6.31579	5.01815e-07	4.51868e-06	6.20402	4.8713
FAM160A1	3.60282	5.04714e-07	4.54266e-06	7.79832	6.13585
TRPV4	2.48506	5.05561e-07	4.54604e-06	8.90956	7.02474
TCF7L1	3.68265	5.077e-07	4.56314e-06	7.0063	5.53163
NR2F6	2.10943	5.1263e-07	4.60316e-06	7.01595	5.93497
TICRR	3.04217	5.20078e-07	4.66135e-06	7.20273	5.74861
COL4A6	4.29854	5.19922e-07	4.66135e-06	6.01803	4.96975
PRSS22	4.81495	5.22685e-07	4.67819e-06	6.60923	5.20902
LCA5	3.82338	5.23008e-07	4.67891e-06	7.96696	6.00418
PCDHB12	8.53488	5.26272e-07	4.70374e-06	6.55365	4.78869
ADAMTS12	6.88084	5.28238e-07	4.71475e-06	5.85853	4.74173
POSTN	7.14657	5.34256e-07	4.76402e-06	6.06687	4.80247
MOK	2.19128	5.36198e-07	4.77694e-06	7.05561	5.97291
CPZ	7.4056	5.51035e-07	4.89555e-06	6.02332	4.74173
SLC6A20	4.34907	5.60475e-07	4.97253e-06	6.6268	5.30316
MMP9	2.82291	5.79208e-07	5.12693e-06	7.99775	6.22096
LAPTM4B	2.92328	5.8743e-07	5.19256e-06	8.64343	6.70792
TSPAN7	4.35417	5.8816e-07	5.19663e-06	7.32345	5.32539
EYA2	5.32449	6.07626e-07	5.35634e-06	6.89312	5.18474
PCDHB2	4.20269	6.14981e-07	5.41869e-06	7.29958	5.48475
MNS1	3.62961	6.3227e-07	5.56086e-06	7.12262	5.58962
MSI1	8.76596	6.79985e-07	5.96962e-06	6.0997	4.74173
GTSE1	2.32759	6.89998e-07	6.05476e-06	7.16384	5.97809
CYP26B1	6.50782	7.00849e-07	6.1416e-06	5.94692	4.80247
CD40LG	-2.14567	7.01685e-07	6.14613e-06	6.95756	8.74343
HS3ST2	7.10599	7.06006e-07	6.17835e-06	5.86477	4.74173
RGL3	5.19559	7.15095e-07	6.25221e-06	6.62403	5.09897
WNT2	6.95858	7.15868e-07	6.25614e-06	5.88615	4.74173
ZNF385D	-4.57386	7.30392e-07	6.37439e-06	4.99261	6.15596
ESAM	-2.39169	7.325e-07	6.38411e-06	6.02755	7.4058
NCR1	-2.24496	7.40232e-07	6.44567e-06	7.11163	9.11417
CST6	4.94838	7.42762e-07	6.46478e-06	5.93307	4.91767
MARC1	-2.56461	7.58743e-07	6.60089e-06	6.75917	8.90187
ANKRD30BP2	5.75545	7.69679e-07	6.69e-06	6.51664	4.9909
HNF4G	9.49667	7.70238e-07	6.69183e-06	6.87809	4.74173
ARHGAP39	3.50555	7.84563e-07	6.80266e-06	6.39613	5.28839
KRT17	6.54151	7.89723e-07	6.84261e-06	9.10135	5.97482
PEAR1	-2.98323	7.9139e-07	6.85089e-06	5.54023	7.0129
FILIP1	5.34516	8.05756e-07	6.96587e-06	6.45365	5.14284
SERINC2	3.01006	8.08647e-07	6.98773e-06	9.06895	6.86801
ANKFN1	6.31227	8.11834e-07	7.01212e-06	6.10471	4.82399
TTK	3.39487	8.48745e-07	7.30474e-06	7.93637	6.04228
GPR174	-2.04998	8.59695e-07	7.39238e-06	7.13764	8.97274
PCDP1	5.3575	8.62691e-07	7.41483e-06	6.56858	5.13624
FJX1	5.73363	8.70322e-07	7.47043e-06	5.55711	4.74173
CD9	2.63419	8.80851e-07	7.54951e-06	10.1687	7.98771
CYP4F11	6.69587	8.81103e-07	7.54951e-06	6.41355	4.87939
RHOBTB3	2.3172	8.83245e-07	7.5645e-06	9.86692	8.05593
CMKLR1	2.03969	9.0885e-07	7.7528e-06	10.0816	8.2887
A4GALT	6.71627	9.0867e-07	7.7528e-06	6.36755	4.84003
BUB1	2.1502	9.12064e-07	7.77676e-06	8.39341	6.89399
HPN	6.68217	9.35698e-07	7.96066e-06	6.17407	4.81304
FHL2	3.16961	9.6851e-07	8.21443e-06	7.21287	5.77112
PPP2R2B	-2.01837	9.75254e-07	8.26288e-06	7.08699	8.82643
LOC100507346	-2.42153	9.83818e-07	8.32229e-06	5.58063	6.70976
NR1H3	2.24962	9.89987e-07	8.35979e-06	8.30219	6.72249
PPP1R14C	4.44792	9.90786e-07	8.36288e-06	6.44517	5.10873
STEAP4	3.50245	1.02161e-06	8.61927e-06	10.2793	7.83812
SEPT4	-2.61856	1.03268e-06	8.69742e-06	5.68512	6.94019
MAPK8IP1	2.05165	1.03792e-06	8.73777e-06	8.22141	6.81575
GALNT14	3.6519	1.03943e-06	8.74661e-06	6.73595	5.32088
WDR65	5.74082	1.07966e-06	9.07727e-06	6.43362	5.05334
GLRB	7.10816	1.08586e-06	9.11678e-06	6.27493	4.80807
MAP3K13	2.0654	1.08913e-06	9.13299e-06	8.51174	7.11134
KRT6A	12.2363	1.09429e-06	9.16827e-06	8.95026	4.74173
LIPH	3.73125	1.10692e-06	9.25396e-06	8.1341	6.10102
DTNA	3.50079	1.10903e-06	9.2595e-06	9.61216	7.02192
CDR2L	5.33911	1.14649e-06	9.52563e-06	6.24454	4.90865
P2RY6	3.1625	1.18171e-06	9.79e-06	7.22646	5.72499
PBK	4.05113	1.21322e-06	1.00209e-05	6.50837	5.26008
GPR84	2.83217	1.21537e-06	1.00292e-05	7.36192	5.90148
CILP	4.12024	1.21578e-06	1.00292e-05	6.87243	5.46495
ZNF608	3.25588	1.25549e-06	1.03435e-05	7.76058	6.18585
FAM71A	3.03809	1.26671e-06	1.0418e-05	5.89261	5.03253
PTCRA	-2.65558	1.2716e-06	1.04538e-05	5.2608	6.02225
RUNX1T1	4.98935	1.28545e-06	1.05542e-05	6.41349	4.99323
CLIC5	3.42992	1.29181e-06	1.06019e-05	8.89519	6.77697
ATF3	2.53508	1.30484e-06	1.07042e-05	10.2334	7.70435
AVPI1	2.36201	1.31041e-06	1.07454e-05	6.76414	5.70379
COL16A1	5.32082	1.33058e-06	1.08934e-05	6.04522	4.87423
LOC728763	-4.14471	1.34031e-06	1.09511e-05	4.95842	5.89934
TNFSF4	-2.25535	1.34061e-06	1.09511e-05	5.66524	6.63161
ROBO1	2.77505	1.34455e-06	1.09786e-05	7.87695	6.12179
CCDC74A	3.1656	1.34912e-06	1.10066e-05	6.24235	5.28361
DNAH2	3.99877	1.35019e-06	1.10106e-05	7.95544	5.827
APLN	6.10671	1.35335e-06	1.10317e-05	5.80512	4.78869
FCRL3	-2.49154	1.38891e-06	1.13073e-05	7.77208	10.3205
CLCA2	7.04756	1.39539e-06	1.13504e-05	5.88194	4.74173
CDSN	7.21456	1.40096e-06	1.13813e-05	6.08946	4.78869
GPR133	2.4701	1.41325e-06	1.14666e-05	9.94514	7.85645
KRT86	3.52867	1.46202e-06	1.18077e-05	6.97219	5.47655
LMCD1	3.60977	1.46338e-06	1.18137e-05	6.24338	5.18808
TDRD10	5.84162	1.48633e-06	1.19839e-05	6.11523	4.87448
CAPN9	7.50683	1.49597e-06	1.20566e-05	6.24139	4.82399
CDC42EP1	3.31026	1.50128e-06	1.20893e-05	6.93224	5.51991
MMP12	7.26749	1.50436e-06	1.21091e-05	5.91718	4.74173
FZD5	2.56202	1.50555e-06	1.21091e-05	7.30375	5.84583
KIF2C	2.72651	1.5142e-06	1.2173e-05	8.02457	6.36889
TLL1	6.45927	1.52475e-06	1.22476e-05	5.73836	4.74173
GPRC5C	4.89082	1.54953e-06	1.24362e-05	6.98841	5.03483
LOC728392	-2.20352	1.59888e-06	1.2795e-05	5.87714	7.15846
DOK4	2.80286	1.60171e-06	1.2807e-05	6.80523	5.65385
AGR3	10.6516	1.61918e-06	1.29414e-05	7.34079	4.74173
TMCC2	-2.88756	1.65037e-06	1.31688e-05	5.57784	6.683
VAT1L	6.24548	1.64975e-06	1.31688e-05	5.68323	4.74173
KIF19	-3.82011	1.66311e-06	1.3254e-05	5.25308	6.56777
MEX3D	2.6558	1.66737e-06	1.32769e-05	7.09987	5.87614
LOC643802	-2.20734	1.72108e-06	1.3682e-05	6.15706	7.62101
SLC1A1	3.57097	1.86299e-06	1.47251e-05	7.56619	5.88283
APBB2	3.42911	1.86939e-06	1.47636e-05	8.01039	5.87386
STAP2	2.94789	1.88147e-06	1.48529e-05	7.21898	5.87792
KIR2DL1	-3.54718	1.89079e-06	1.49082e-05	6.64816	9.29648
IL1A	3.52092	1.90878e-06	1.50315e-05	6.07102	5.11915
RP1	9.44518	1.91883e-06	1.51045e-05	7.44005	4.87796
CACNA1D	3.0414	1.93765e-06	1.52402e-05	7.8758	6.30702
KCNA1	6.79788	1.95158e-06	1.53382e-05	5.96107	4.79222
DUOXA1	6.81052	1.9735e-06	1.54905e-05	5.84224	4.79307
BMP6	-2.94693	1.97503e-06	1.54963e-05	5.76335	7.08651
HOXB7	3.80904	2.02798e-06	1.58794e-05	6.27826	5.21347
NMUR1	-2.32943	2.04949e-06	1.60283e-05	5.65442	6.68983
SPATA25	2.73717	2.05388e-06	1.60561e-05	6.38446	5.41079
LMOD1	3.75564	2.0651e-06	1.61373e-05	6.14748	5.16632
CPNE5	-2.13644	2.07258e-06	1.61892e-05	6.12148	7.40327
IL33	6.64859	2.08289e-06	1.62631e-05	5.77807	4.74173
SLC19A2	2.24006	2.08953e-06	1.63083e-05	8.73693	7.21595
EPS8L3	7.60217	2.09225e-06	1.6323e-05	6.40209	4.90077
SGCE	2.51108	2.09729e-06	1.63424e-05	7.83504	6.39191
HUNK	5.04047	2.09712e-06	1.63424e-05	6.69128	5.28573
GLDN	5.22494	2.09675e-06	1.63424e-05	7.37439	5.26707
GRIN2A	6.50177	2.13488e-06	1.66151e-05	6.23848	4.86634
ZNF423	5.7642	2.1518e-06	1.67333e-05	5.70613	4.80247
SDCBP2	8.21126	2.16232e-06	1.68083e-05	6.27842	4.74173
SMOC1	6.00336	2.18552e-06	1.69818e-05	7.63589	5.55215
SORCS2	2.57323	2.23354e-06	1.73409e-05	7.09988	5.88795
KCTD14	6.28064	2.24699e-06	1.74383e-05	5.69252	4.74173
SLC44A3	5.73445	2.36589e-06	1.82875e-05	6.97508	5.03029
ZBTB46	2.06472	2.37164e-06	1.83172e-05	6.0907	5.3901
CASKIN2	4.38384	2.42983e-06	1.87071e-05	6.50402	5.15944
NPAS3	7.22425	2.42969e-06	1.87071e-05	5.92992	4.74173
RSPO3	7.75403	2.47545e-06	1.90351e-05	6.19502	4.79999
NT5M	-3.08848	2.47699e-06	1.90394e-05	5.26692	6.12779
THSD7A	5.4154	2.49779e-06	1.91839e-05	6.14681	5.00381
PTGES	4.91418	2.51063e-06	1.92748e-05	6.2702	5.01916
HOXA5	2.65266	2.5222e-06	1.9356e-05	6.45941	5.38883
SNCG	6.14142	2.58211e-06	1.97921e-05	5.78719	4.78869
CCL3	2.85203	2.65552e-06	2.03224e-05	12.7296	9.9961
RHOXF2	-2.11898	2.67877e-06	2.04841e-05	5.74651	6.73954
MRGPRF	6.24526	2.71465e-06	2.07338e-05	5.8395	4.78869
IYD	7.69189	2.74095e-06	2.0918e-05	6.27014	4.84943
FHDC1	3.60285	2.82225e-06	2.14875e-05	7.34812	5.8355
HSPA2	2.37847	2.85375e-06	2.1693e-05	8.57081	6.65465
WDR66	2.91146	2.8571e-06	2.17014e-05	7.60888	6.16098
ATP9A	3.40539	2.8911e-06	2.19078e-05	9.09448	6.8999
MLLT4	2.09757	2.92046e-06	2.20869e-05	11.7389	9.94327
AMY1A	9.25053	2.9456e-06	2.22421e-05	9.29198	5.38764
FER1L4	3.37592	2.94787e-06	2.22505e-05	6.2885	5.31537
RAB17	5.80725	3.0037e-06	2.26364e-05	5.88688	4.85048
KRT2	-3.71883	3.02231e-06	2.27678e-05	4.97998	5.85137
C3AR1	2.1944	3.03273e-06	2.28373e-05	10.9968	8.81521
C6orf223	5.09964	3.07106e-06	2.31079e-05	5.68933	4.85133
FOXA2	7.71511	3.18986e-06	2.39271e-05	5.92877	4.74173
SPDEF	4.64564	3.19217e-06	2.39351e-05	5.82031	4.92547
ASPG	6.14285	3.21765e-06	2.40887e-05	5.65389	4.74173
C10orf105	-2.08882	3.24806e-06	2.43069e-05	5.38911	6.05652
KIF7	2.42741	3.31899e-06	2.47895e-05	6.71605	5.68242
TGFB2	2.82992	3.39891e-06	2.53177e-05	6.6093	5.53621
KIAA0895	3.13461	3.43962e-06	2.55716e-05	7.16712	5.76228
SHISA4	2.71305	3.46676e-06	2.57534e-05	6.9191	5.742
NELL1	7.90641	3.48758e-06	2.58981e-05	6.07942	4.74173
C19orf33	3.12877	3.50122e-06	2.59894e-05	8.24583	6.49836
IL17RE	2.77892	3.58761e-06	2.65489e-05	6.63447	5.52316
STC1	7.44978	3.59017e-06	2.65576e-05	5.87139	4.74173
FAM127C	2.3188	3.59498e-06	2.6583e-05	6.78392	5.77859
SLC9A3R2	2.85621	3.6132e-06	2.66767e-05	7.14279	5.81943
FLJ22184	3.70703	3.67245e-06	2.70831e-05	6.96338	5.53679
CCL5	-2.21634	3.70992e-06	2.73385e-05	9.91142	12.3283
BPI	-2.48241	3.76092e-06	2.76826e-05	5.80322	7.15607
ZNF334	3.84452	3.77758e-06	2.77946e-05	7.09806	5.513
FBXO16	5.62785	3.81508e-06	2.80384e-05	6.01272	4.87498
SIX5	2.88054	3.82972e-06	2.81138e-05	6.45314	5.44448
MS4A6E	5.69981	3.8847e-06	2.84957e-05	6.28987	4.91122
MLLT4-AS1	6.86083	3.95312e-06	2.89425e-05	6.07758	4.82747
TGM1	2.36436	3.97777e-06	2.90898e-05	8.62616	7.07604
TBC1D8B	2.28665	4.02342e-06	2.94013e-05	7.75912	6.45484
TROAP	3.37075	4.10019e-06	2.9917e-05	6.67332	5.34053
ELFN2	5.12946	4.25406e-06	3.09459e-05	5.99289	5.03035
MCAM	4.11923	4.46464e-06	3.23678e-05	7.1189	5.70524
TMEM246	5.06412	4.52584e-06	3.27499e-05	6.25319	4.93203
TMEM52B	3.49922	4.54492e-06	3.28534e-05	5.78191	5.02607
LINC00243	-2.46339	4.59864e-06	3.3177e-05	6.28373	7.97157
CCNB2	2.50853	4.6555e-06	3.3537e-05	7.32781	6.01738
RHBDL2	3.01346	4.71325e-06	3.38897e-05	6.96183	5.73002
ASPM	2.34789	4.72842e-06	3.39861e-05	10.2977	8.25112
C4BPB	3.36281	4.75304e-06	3.41503e-05	6.49377	5.33641
RNF133	6.50581	4.79639e-06	3.44489e-05	5.72738	4.74173
UBE2C	2.33051	4.80477e-06	3.44962e-05	7.63199	6.27359
PHLDA3	4.90741	4.87827e-06	3.49979e-05	5.94999	4.97757
C15orf54	-5.40569	4.98195e-06	3.56885e-05	4.74173	5.39634
FAT3	3.16429	5.00261e-06	3.58099e-05	5.97271	5.17761
HOXA4	3.02761	5.01798e-06	3.59066e-05	6.37061	5.42026
CA2	-2.5216	5.03773e-06	3.60345e-05	8.21586	10.1045
KRT16	6.85466	5.19464e-06	3.70469e-05	6.3953	4.8423
HTRA3	6.17783	5.35406e-06	3.80968e-05	5.91721	4.84003
NT5DC2	2.43109	5.37734e-06	3.82251e-05	8.99785	7.09662
NBL1	4.96972	5.3944e-06	3.83297e-05	6.7277	5.10066
LRRC49	3.26197	5.42134e-06	3.85069e-05	6.61528	5.45249
AJUBA	4.42025	5.44672e-06	3.86574e-05	6.72017	5.26116
LOC100129083	-2.12919	5.47784e-06	3.88081e-05	5.57227	6.4778
PREX2	3.06883	5.54357e-06	3.92305e-05	6.1011	5.13442
MMP25	-2.00896	5.6177e-06	3.97114e-05	5.7951	6.70437
COL21A1	8.71851	5.71384e-06	4.03613e-05	6.91509	4.80807
DOC2B	4.33687	5.78649e-06	4.08296e-05	6.27004	5.08331
KIAA1549L	5.59126	5.81021e-06	4.0952e-05	5.91625	4.8612
ATP6V1G2	-2.19393	5.91522e-06	4.15857e-05	5.32354	5.98442
DNAH7	2.56531	5.92559e-06	4.16282e-05	7.71987	6.35631
ANXA10	7.06354	6.04134e-06	4.2348e-05	6.29296	4.91207
CLDN3	9.5145	6.04182e-06	4.2348e-05	6.72506	4.74173
TMEM184A	2.4097	6.19774e-06	4.33661e-05	7.48348	6.12328
TMEM200A	2.33539	6.39881e-06	4.46919e-05	7.29516	5.94401
EPHA10	4.58876	6.41751e-06	4.48063e-05	6.33576	5.15635
PMEPA1	2.81383	6.49002e-06	4.52634e-05	6.39905	5.46313
EGLN3	2.38034	6.79135e-06	4.72965e-05	7.87063	6.37972
SPTBN4	2.2018	6.90246e-06	4.79662e-05	6.12089	5.3944
JAM3	-2.1798	6.99162e-06	4.85159e-05	7.73552	9.49969
DDX11L10	-3.93462	7.03985e-06	4.87978e-05	5.80217	7.7562
PCDHGA12	3.17149	7.06936e-06	4.89496e-05	7.44556	5.73408
FAM149A	5.22461	7.0931e-06	4.90787e-05	6.80612	5.2592
C12orf55	4.00917	7.23124e-06	4.99627e-05	6.86663	5.5739
RAP1GAP	3.66586	7.2594e-06	5.01214e-05	6.99304	5.48772
IQCA1	2.67802	7.26237e-06	5.01239e-05	7.48828	6.0095
HEY1	3.86866	7.28466e-06	5.02417e-05	5.94219	5.01165
TRABD2A	-2.17136	7.29721e-06	5.03103e-05	7.56389	9.61537
PCDH1	3.25203	7.32423e-06	5.04785e-05	8.7504	6.71882
ATP13A4	3.69818	7.42851e-06	5.10876e-05	8.87411	7.1256
TRIM31	9.60902	7.44175e-06	5.11421e-05	6.57381	4.79307
ANGPTL2	2.50923	7.50632e-06	5.15124e-05	6.57116	5.5304
DSPP	8.01266	7.54244e-06	5.17419e-05	7.34576	4.85406
KIF23	2.9932	7.58931e-06	5.20078e-05	8.44252	6.58848
ADH1B	9.29797	7.58833e-06	5.20078e-05	6.48472	4.74173
MAP1LC3A	2.62729	7.6493e-06	5.23817e-05	6.489	5.48701
PI15	7.0398	7.75711e-06	5.29881e-05	5.98599	4.78869
SOX4	2.20174	8.1255e-06	5.5289e-05	8.46914	7.08514
SH3GL3	6.1845	8.1312e-06	5.53082e-05	5.62036	4.74173
FANK1	2.43459	8.14929e-06	5.54117e-05	6.636	5.66648
IRX3	5.93165	8.1866e-06	5.56262e-05	5.93082	4.82399
NTNG2	-2.02503	8.26741e-06	5.60764e-05	5.82785	6.87585
CP	3.19866	8.26426e-06	5.60764e-05	8.51614	6.65044
BEND7	3.13403	8.46459e-06	5.73331e-05	6.50556	5.37914
MDS2	-2.38305	8.53576e-06	5.77543e-05	5.67131	6.80639
PABPC4L	6.39156	8.67335e-06	5.86234e-05	5.6978	4.74173
CD24	3.37349	9.074e-06	6.11813e-05	8.46469	6.69176
HIST2H3C	2.66862	9.09845e-06	6.13247e-05	9.95895	7.67028
LOC100996761	2.71806	9.72951e-06	6.52812e-05	6.99485	5.7418
HYDIN	4.23863	9.82057e-06	6.58234e-05	7.5521	5.46822
KRT13	7.25408	9.82743e-06	6.58465e-05	5.85657	4.78869
CDKN3	2.56099	1.00267e-05	6.69952e-05	7.30458	5.97925
KRT73-AS1	-2.25811	1.01171e-05	6.75054e-05	5.28571	5.92796
LGALS2	-2.82385	1.0246e-05	6.82709e-05	7.12853	8.90114
BMPR1B	5.54019	1.04562e-05	6.948e-05	6.33407	4.9176
FAM133CP	3.86462	1.05007e-05	6.97274e-05	6.58511	5.27737
CKAP2L	3.05193	1.05058e-05	6.9737e-05	7.18504	5.69276
DRC1	7.22101	1.05294e-05	6.98694e-05	5.91206	4.80247
SLC4A11	2.68893	1.05852e-05	7.01678e-05	7.09028	5.8985
KIF26B	2.48516	1.06103e-05	7.03094e-05	6.87585	5.8062
LINC01123	5.13737	1.06368e-05	7.04609e-05	5.81787	4.89052
TBX15	4.5772	1.0756e-05	7.12018e-05	6.69737	5.1942
GUCY1A2	4.53428	1.10899e-05	7.32863e-05	5.84482	4.96816
XIRP1	5.87354	1.11978e-05	7.39485e-05	5.66193	4.79307
CYP2C18	7.72996	1.13035e-05	7.457e-05	6.0889	4.85133
TUSC1	2.50932	1.1428e-05	7.53136e-05	5.802	5.19337
SRGAP1	2.44454	1.16062e-05	7.64096e-05	9.17437	6.87011
PLCD3	2.30597	1.1645e-05	7.66389e-05	7.49977	6.28118
C9orf47	-3.00674	1.176e-05	7.73692e-05	5.44363	6.76895
S100A12	-2.76753	1.18106e-05	7.76761e-05	7.63899	10.4079
TUBB2B	3.03391	1.20235e-05	7.89147e-05	8.72595	6.49302
CADM1	2.19498	1.21302e-05	7.95603e-05	8.82276	7.23687
WNT2B	2.28002	1.21967e-05	7.99426e-05	6.70127	5.67209
CFHR3	4.46548	1.22471e-05	8.0218e-05	6.14551	5.08803
NPHP1	3.05305	1.22714e-05	8.03498e-05	7.05067	5.746
HRASLS	-3.18199	1.23733e-05	8.07978e-05	5.22197	6.0449
C1orf226	4.73026	1.24277e-05	8.11253e-05	6.36069	5.08871
NAT8B	-2.34474	1.25278e-05	8.1696e-05	5.26062	5.89909
ARMC4	3.88291	1.27188e-05	8.2885e-05	6.18093	5.21889
LZTS3	2.28984	1.27443e-05	8.30234e-05	6.68215	5.71707
TNFRSF19	6.21249	1.28868e-05	8.39234e-05	6.05865	4.93765
ANKRD1	3.78681	1.29935e-05	8.45324e-05	5.80581	5.04688
KIRREL2	2.96417	1.3311e-05	8.64809e-05	5.87116	5.12449
DMGDH	3.59382	1.34593e-05	8.73564e-05	6.31807	5.17072
PTPRK	2.87945	1.35533e-05	8.78776e-05	9.85829	7.92069
SYDE1	3.76653	1.41871e-05	9.13414e-05	5.93247	5.03941
TLR3	2.36859	1.42978e-05	9.19929e-05	8.45218	6.98766
GAS6	2.04778	1.47419e-05	9.45662e-05	9.343	7.49529
S100P	3.60606	1.47548e-05	9.46173e-05	7.51464	5.9053
HSD11B1	2.07453	1.50187e-05	9.61495e-05	6.46642	5.6096
MIA2	5.3196	1.50555e-05	9.6289e-05	5.7131	4.85381
FAM46B	4.96063	1.51684e-05	9.69472e-05	5.48724	4.79999
JAKMIP1	-2.04798	1.51762e-05	9.69645e-05	7.05624	8.8031
EPN3	3.68344	1.54519e-05	9.85627e-05	5.97957	5.1309
SLAMF9	5.08375	1.54875e-05	9.8757e-05	5.64443	4.85048
EYA1	6.97573	1.563e-05	9.95013e-05	6.21024	4.87444
PCDHA6	7.99179	1.57987e-05	0.000100367	6.08535	4.74173
CNGA1	2.85656	1.59413e-05	0.000101149	6.69295	5.61144
KLK8	7.81182	1.59838e-05	0.000101385	5.91228	4.74173
MAPK12	2.32384	1.60086e-05	0.000101509	6.17147	5.4136
PPP1R13L	2.54126	1.60219e-05	0.00010156	7.08504	5.95771
STAB1	2.14147	1.61924e-05	0.000102607	14.7455	12.3116
RAPGEF4	3.04025	1.62122e-05	0.000102699	6.84229	5.53789
LHX9	6.11408	1.62777e-05	0.000103079	5.75733	4.78869
CDC6	2.58752	1.62921e-05	0.000103137	7.72311	6.22193
SCGB1C1	-5.31248	1.63779e-05	0.000103646	4.79456	5.52798
CD200	2.09424	1.69247e-05	0.000106861	7.75566	6.50415
WISP1	4.42799	1.6955e-05	0.000107017	5.76393	4.92144
C1QL1	5.86896	1.7176e-05	0.00010827	6.35573	4.86255
SPATA17	6.58447	1.71873e-05	0.000108306	6.15888	4.94431
IGSF9	3.17005	1.76448e-05	0.000110971	6.90409	5.47938
KRT4	7.51146	1.76618e-05	0.000111042	6.06789	4.78869
MAP2	4.69478	1.82134e-05	0.000114211	7.87904	6.05573
ANKRD55	-2.60538	1.84771e-05	0.00011579	5.89945	7.40056
KIFC1	2.53293	1.87492e-05	0.000117381	8.06927	6.54664
C6orf222	9.64787	1.89458e-05	0.000118573	6.54234	4.74173
CMBL	3.44365	1.93008e-05	0.000120521	6.61782	5.49793
GPR116	9.43514	1.96032e-05	0.00012225	8.30338	5.05904
LURAP1L	3.76256	1.96997e-05	0.000122773	6.34281	5.17134
PYGO1	4.68231	2.01775e-05	0.000125366	6.17042	4.97542
PRR15L	4.17506	2.03077e-05	0.000126072	6.31696	5.2654
FGB	6.89593	2.03376e-05	0.000126177	6.14044	4.90182
STAC	4.0581	2.04265e-05	0.000126606	6.51184	5.34161
ZWINT	2.13506	2.05567e-05	0.000127291	7.41729	6.17075
C8orf47	5.81045	2.07064e-05	0.000128118	6.26269	4.95107
PTPRZ1	6.00916	2.07102e-05	0.000128118	5.89221	4.84943
KRT81	3.78442	2.07771e-05	0.000128449	6.37004	5.14642
EVC	2.30993	2.0862e-05	0.000128891	8.36916	6.80368
C9orf116	3.90089	2.09781e-05	0.000129483	5.83194	5.03239
LOC101928717	-2.04297	2.13657e-05	0.000131665	5.34686	5.92666
VSIG10	2.68877	2.13641e-05	0.000131665	6.76685	5.58873
PLEKHN1	2.64846	2.15732e-05	0.000132859	6.55173	5.58338
CNTN4	6.00894	2.15913e-05	0.000132928	6.01395	4.90077
THBS1	2.36809	2.17863e-05	0.000134	14.8881	13.1013
PLEKHH2	2.18474	2.18597e-05	0.000134409	7.816	6.54694
DRAXIN	-3.21536	2.22118e-05	0.000136356	5.21291	6.24526
NDUFA4L2	5.78607	2.22214e-05	0.000136371	5.64166	4.79222
MYOM2	-4.02002	2.31142e-05	0.0001414	6.3111	9.29372
SLCO5A1	2.94936	2.32024e-05	0.000141895	6.49526	5.50569
CDA	-2.01231	2.32626e-05	0.000142218	7.08316	8.8034
MYBL1	-2.15695	2.33984e-05	0.000142957	9.08896	11.4182
PALM2-AKAP2	7.69811	2.36005e-05	0.000144055	6.02441	4.74173
SRPX	5.05398	2.41473e-05	0.000147206	6.16647	4.97243
NME8	-2.12671	2.42563e-05	0.000147824	6.8742	8.75703
SYNC	2.54877	2.47407e-05	0.000150538	6.41712	5.48599
FCRL5	-2.5645	2.49603e-05	0.000151683	6.15501	7.901
C1orf53	3.1854	2.49765e-05	0.000151733	5.73815	5.0424
AVPR1A	-3.7498	2.50409e-05	0.000152076	5.05571	5.97806
CNKSR1	2.58428	2.53203e-05	0.00015358	8.46049	7.05153
SLC15A1	3.52364	2.59571e-05	0.000157194	6.68059	5.52485
IL17RD	2.63946	2.61573e-05	0.000158109	6.33736	5.4816
FNDC1	5.08758	2.61526e-05	0.000158109	6.00624	4.88584
JPH2	5.54892	2.64039e-05	0.000159499	5.61354	4.79307
THNSL2	2.69236	2.64143e-05	0.000159512	7.23854	5.84772
PCDHB16	9.21877	2.69821e-05	0.00016277	6.78103	4.79222
MARVELD3	3.32652	2.71585e-05	0.000163596	6.18378	5.22151
C14orf79	2.16446	2.75037e-05	0.000165468	6.76147	5.76753
TEKT2	2.98961	2.76191e-05	0.000166059	6.42231	5.43045
FGFBP1	4.68419	2.78174e-05	0.000167095	5.84482	4.94082
TPI1P3	4.7773	2.79853e-05	0.000167737	5.8578	4.92472
KRT6C	6.7821	2.81986e-05	0.000168964	5.9425	4.78869
CTSV	2.90737	2.82431e-05	0.000169178	5.79836	5.13408
SCN2A	4.34589	2.84292e-05	0.000170081	6.96423	5.56924
MAT1A	7.04981	2.85518e-05	0.000170655	5.81047	4.74173
HOXC10	7.00206	2.86204e-05	0.000170962	5.78502	4.74173
SH3RF2	2.46636	2.90751e-05	0.000173407	7.82177	6.33007
ACOT11	2.30351	2.92235e-05	0.000174238	7.44354	6.10679
PCDHAC1	6.17839	3.01741e-05	0.000179461	5.59541	4.74173
KIF17	2.80858	3.03925e-05	0.000180593	6.14806	5.29492
ANKRD30A	6.34491	3.06875e-05	0.000182121	5.98743	4.84003
PIH1D2	3.35184	3.1218e-05	0.000184871	6.01465	5.09721
LOC102724108	-2.79479	3.29608e-05	0.000194	5.09564	5.77296
BACE2	2.30452	3.29947e-05	0.00019414	8.42698	6.98296
HSPB7	7.22846	3.30254e-05	0.000194261	5.9251	4.74173
PCSK9	7.19221	3.34354e-05	0.000196553	5.8634	4.79222
SERPINB5	7.71702	3.34937e-05	0.000196836	5.91338	4.79307
FA2H	4.24834	3.38223e-05	0.000198464	6.59268	5.33334
SHC3	4.32597	3.40459e-05	0.000199707	5.90178	4.90952
GPR112	5.71225	3.40548e-05	0.000199707	5.91468	4.85856
ITPKA	4.15536	3.43289e-05	0.000201131	5.86649	4.97608
ADRB1	2.4244	3.5138e-05	0.000205434	6.57978	5.60224
GABRB3	4.054	3.5562e-05	0.000207723	5.86252	4.91232
NCKAP1	2.14079	3.60231e-05	0.000210162	10.4478	8.69944
KPNA7	5.27091	3.62153e-05	0.000211219	5.68552	4.80807
DAAM2	5.72594	3.68779e-05	0.000214759	7.53781	5.18453
CADM4	2.43175	3.71042e-05	0.000215909	6.45629	5.58258
OR1D5	-3.08231	3.7432e-05	0.000217525	5.15233	5.96052
FCRL2	-2.15306	3.74441e-05	0.00021753	6.76961	8.57286
SH3RF1	2.60447	3.77693e-05	0.000219155	9.06231	7.43404
LINC00478	4.22065	3.78035e-05	0.000219288	5.80482	4.94695
GPR55	-2.40133	3.82496e-05	0.000221542	5.28103	5.99357
CAMK1G	5.59603	3.85981e-05	0.000223356	5.38603	4.74173
MAPK15	5.05081	3.91115e-05	0.000226058	6.32574	4.94215
HSD3B2	6.18786	3.92433e-05	0.000226616	5.72258	4.79222
SPAG6	5.19163	3.9503e-05	0.000228037	6.4573	5.22114
CCBE1	3.77534	4.07519e-05	0.000234409	6.43421	5.29967
XCR1	2.23029	4.21487e-05	0.000241584	6.59265	5.6444
PKD1L2	5.71288	4.22486e-05	0.000242012	5.53413	4.74173
ALPP	5.82765	4.31129e-05	0.000246597	5.98993	4.89033
RAB27B	-2.08358	4.33823e-05	0.000247844	7.18872	8.72494
STOX2	5.31634	4.37605e-05	0.000249856	6.28296	4.87356
EPDR1	3.36794	4.41774e-05	0.000252012	6.36868	5.33376
DSC1	-2.30087	4.44531e-05	0.00025336	6.18229	7.57058
SPA17	2.14018	4.46882e-05	0.000254474	7.11289	6.03321
GAL3ST1	4.58852	4.51386e-05	0.000256736	5.84958	4.92472
MIR554	3.25901	4.64086e-05	0.000263276	5.63219	5.04688
PRTG	4.80615	4.64316e-05	0.000263276	6.09335	5.03749
ARHGEF25	2.48945	4.67248e-05	0.00026482	6.9814	5.86865
PNMA6A	2.5928	4.68059e-05	0.000265202	7.01157	5.77347
RAMP2	5.94642	4.71007e-05	0.000266715	5.57759	4.74173
FGFR3	3.38167	4.7182e-05	0.000267096	5.98997	5.1168
TMEM30B	2.8777	4.72106e-05	0.00026718	6.57436	5.56182
GJB3	5.70331	4.73453e-05	0.000267785	6.20217	4.96493
RELN	3.89895	4.75268e-05	0.000268654	6.46277	5.16
KCND2	6.48087	4.75626e-05	0.000268778	5.65971	4.74173
GPR98	3.89722	4.79016e-05	0.000270376	7.91526	6.25689
ZNF812	5.73303	4.83853e-05	0.000272866	6.3882	5.06776
ADAMTS14	2.5756	4.90155e-05	0.00027634	5.91608	5.24722
ZDHHC1	2.48909	4.92481e-05	0.000277407	6.15384	5.41414
STK32A	5.87816	4.9363e-05	0.000277839	5.94555	4.96256
SOGA2	2.04824	5.02465e-05	0.000282124	6.78123	5.89418
ALG1L	2.51229	5.12129e-05	0.000286882	6.32036	5.48147
CACNG4	3.75334	5.20369e-05	0.000290905	6.13668	5.16656
IGFBP5	6.38796	5.20888e-05	0.000291111	5.63729	4.74173
WDR34	2.19156	5.26539e-05	0.000293711	7.18895	6.16433
SMAD6	2.57182	5.26607e-05	0.000293711	5.98734	5.21344
GRIN2D	2.31792	5.36797e-05	0.00029853	6.94664	5.82901
GALNT9-2	5.17192	5.36653e-05	0.00029853	5.68123	4.84696
TSPYL5	2.29321	5.40209e-05	0.000300255	7.29764	6.20234
CDCA8	2.41571	5.41608e-05	0.000300945	7.87312	6.43383
LOC102724788	4.34863	5.43119e-05	0.000301698	6.1652	5.11553
FIGN	5.6085	5.495e-05	0.000304803	5.75114	4.85048
KRT72	-2.83773	5.49982e-05	0.000304983	6.94075	9.13118
IFT81	2.2007	5.66903e-05	0.000313554	8.12885	6.80652
ESCO2	2.67784	5.73795e-05	0.000316548	6.94494	5.75661
LRRC1	2.01067	5.93587e-05	0.000326532	8.37678	7.08503
ST6GALNAC5	5.26307	6.02269e-05	0.000330553	5.7202	4.80807
VWA3B	7.18995	6.05963e-05	0.000332297	5.8016	4.78869
GAD1	4.62855	6.08841e-05	0.000333685	6.01987	4.98116
HJURP	2.6501	6.09773e-05	0.000334101	7.60925	6.13744
AFAP1-AS1	2.53768	6.11629e-05	0.000334928	6.34131	5.52138
NME5	6.34947	6.11568e-05	0.000334928	5.77707	4.78869
ARHGEF26	2.45882	6.12386e-05	0.000335247	6.75064	5.74937
LRCH2	4.7867	6.12904e-05	0.000335435	6.03078	4.90952
ZNRF3	2.09432	6.1406e-05	0.000335877	6.43394	5.63914
EDA2R	4.75007	6.23318e-05	0.000340361	5.84023	4.8953
SEMA5A	2.99791	6.28649e-05	0.000342786	8.60919	6.56844
TMEM151A	5.35588	6.32046e-05	0.000344346	5.4251	4.74173
ROBO2	6.25934	6.31922e-05	0.000344346	5.85797	4.81304
C3orf14	2.2674	6.43847e-05	0.000349984	7.02022	5.81824
POF1B	3.47556	6.50288e-05	0.000353333	9.02707	6.48035
ABCC9	3.17554	6.50613e-05	0.000353363	7.38984	6.14005
SLC22A31	5.12479	6.58128e-05	0.000357042	6.20181	4.99349
SOHLH2	6.62678	6.72851e-05	0.000364245	6.20478	4.94346
CNTN3	6.878	6.72917e-05	0.000364245	5.73229	4.74173
ITGBL1	6.96913	6.75051e-05	0.000365195	5.84131	4.74173
PPP2R2C	6.39459	6.77806e-05	0.000366479	5.81163	4.84943
ACE2	5.21453	6.85137e-05	0.000370028	5.68193	4.85048
FOXJ1	3.98279	6.89953e-05	0.00037242	6.41533	5.33299
NKD2	5.26995	6.93898e-05	0.00037413	5.42847	4.74173
SYBU	3.33428	6.97465e-05	0.000375843	6.92565	5.67087
FAM3B	6.21788	7.01345e-05	0.000377617	7.04244	5.07451
GRHL3	7.57489	7.02359e-05	0.000378057	5.9682	4.74173
IL20RA	7.37365	7.07156e-05	0.000380321	5.92096	4.74173
KCNB1	5.80717	7.1166e-05	0.00038253	5.59567	4.79307
SFTPA2	10.3178	7.14947e-05	0.000384189	7.01331	4.74173
PPIL6	2.36724	7.24761e-05	0.000388812	6.57707	5.71731
TCEAL2	2.94613	7.25533e-05	0.00038901	6.98041	5.69116
ELOVL7	-2.50728	7.28793e-05	0.000390432	6.45358	8.09097
GRHL1	2.85594	7.3036e-05	0.000391163	7.49267	6.0668
GIPC3	-2.71991	7.41738e-05	0.000396595	5.16442	5.9958
WNT16	-2.06439	7.46884e-05	0.000399123	5.47793	6.24818
CCL13	9.05295	7.47088e-05	0.000399123	6.54653	4.74173
ACKR2	3.36111	7.52043e-05	0.000401659	6.47462	5.29652
PPAPDC1A	5.51031	7.53952e-05	0.000402456	5.48907	4.74173
NGEF	4.93899	7.55672e-05	0.000403151	5.8443	4.94878
HECW2	2.82306	7.59124e-05	0.000404768	7.53648	6.29371
IGFBP2	3.19956	7.65075e-05	0.000407828	6.63203	5.34753
PDZK1IP1	2.30872	7.72591e-05	0.000411607	7.29567	6.16167
HIST1H3B	2.41806	7.77109e-05	0.000413785	8.80319	6.86532
SLC6A3	4.0402	7.7905e-05	0.00041459	5.5507	4.86634
PRDM6	4.88991	7.92292e-05	0.000421156	5.61333	4.85048
PRSS12	3.02305	7.93466e-05	0.000421563	7.56418	6.33851
INHBB	4.74933	7.94959e-05	0.00042224	5.89764	4.8953
CLEC2L	-4.54181	7.95357e-05	0.000422335	4.85268	5.48822
HID1	2.04826	8.07896e-05	0.000428285	7.19159	6.12307
PCDHGB5	2.74349	8.1244e-05	0.00043022	8.33171	6.86696
TM4SF4	8.83717	8.18826e-05	0.000433126	6.73998	4.85296
PLEK2	2.82667	8.20084e-05	0.000433672	6.79651	5.61126
GRIK3	5.03747	8.2287e-05	0.000435026	6.18058	5.09375
CALD1	2.30615	8.28265e-05	0.000437518	10.0268	7.90927
LOC102724031	4.82507	8.29074e-05	0.000437754	6.56152	5.12324
LOC102724364	-2.13926	8.33755e-05	0.000439936	5.40643	6.13422
DNAJC22	3.19391	8.38743e-05	0.000442326	6.18603	5.27808
STXBP1	2.96151	8.47725e-05	0.000446818	9.74455	8.15134
ROS1	9.26646	8.48855e-05	0.000447169	7.34918	4.87095
C4orf47	5.23863	8.51096e-05	0.000448227	6.38025	5.03833
MUC21	9.263	8.56099e-05	0.000450449	10.31	5.79909
PPIAL4C	-2.08181	8.58367e-05	0.000451439	7.62835	9.2292
RCAN2	2.92263	8.66039e-05	0.000455225	7.09148	5.59849
B9D1	2.2845	8.73748e-05	0.000458902	6.29811	5.52813
GZMA	-2.05554	8.91131e-05	0.000467	8.37527	10.6166
SMIM22	4.45411	8.97905e-05	0.00047018	6.16929	5.02472
EXO1	2.2318	9.0925e-05	0.000475992	7.55497	6.31414
IGFL2	6.147	9.09621e-05	0.000476056	5.58116	4.74173
CCR8	-2.52716	9.12106e-05	0.000477227	5.34095	6.17405
SLC52A3	5.44499	9.2271e-05	0.000482121	6.34809	5.00266
PCDHGB7	2.37729	9.23077e-05	0.000482182	7.78198	6.45109
NDRG4	2.91775	9.39525e-05	0.000489322	6.36124	5.39311
NRSN2	2.73786	9.46416e-05	0.000492371	5.922	5.23708
GNA14	4.35472	9.53366e-05	0.000495586	5.83597	4.95818
LGALSL	-2.42911	9.89073e-05	0.000512764	6.2103	7.54424
ERBB2	2.6414	9.91126e-05	0.000513552	10.6502	9.01824
LOC101928548	-4.60998	9.94992e-05	0.00051514	4.84719	5.49718
C14orf166B	2.82372	9.98391e-05	0.000516622	5.66565	5.08858
CDH5	2.28286	0.000101744	0.000525216	6.02894	5.35959
ACSM5	5.17254	0.000101873	0.000525735	6.01855	4.92805
CLEC6A	-2.45286	0.000104322	0.000536934	5.55606	6.68021
KIF1A	5.53957	0.000105994	0.000544085	5.64907	4.84003
SLITRK2	7.26039	0.000106895	0.000547988	5.84235	4.74173
ENPEP	4.04243	0.000109798	0.000561668	6.21215	5.13232
SERTAD4	7.65196	0.000111757	0.000571389	5.89616	4.74173
GRIP2	4.02964	0.000112631	0.000575705	5.85007	4.9289
PAX9	3.57452	0.000113023	0.000577555	6.08189	5.1125
CHRD	5.00238	0.000113439	0.00057937	5.46998	4.79307
PNMA2	2.7298	0.00011392	0.000581368	6.45209	5.54443
HTRA1	2.36131	0.000114806	0.00058558	9.73785	7.49579
MMP10	6.1308	0.000115931	0.000590609	5.54151	4.74173
GPR143	2.89648	0.00011604	0.000590934	6.12436	5.30203
C4BPA	3.86241	0.000116526	0.000593097	6.39725	5.1923
NTN4	3.15428	0.0001166	0.000593316	7.47144	5.76499
GIPC2	2.66563	0.000117979	0.000599699	5.99874	5.27879
FAM72D	2.22539	0.000118129	0.000599987	7.95057	6.55521
ANKRD20A11P	-3.45432	0.00011885	0.00060298	6.11036	8.00813
FBXL2	2.50056	0.000119163	0.000604122	6.88213	5.75136
CSNK2A3	4.2886	0.000119598	0.000606009	7.03172	5.46039
KLRC2	-2.04042	0.000120147	0.000608311	7.13711	8.86888
LOXL1	2.80193	0.000120717	0.000610875	6.55038	5.46801
DEFB1	5.69805	0.000121655	0.000615464	5.78208	4.82399
RHD	-2.07962	0.000121983	0.000616796	7.06811	8.66137
FGF1	4.97701	0.000122879	0.000620838	5.37512	4.74173
ANXA8L1	4.28426	0.000122964	0.000621107	9.83139	6.6682
BCMO1	7.62599	0.000125087	0.00063001	5.90995	4.74173
P2RY1	2.19446	0.000125144	0.000630133	7.51641	6.31102
KRT73	-2.77637	0.000127013	0.000638045	7.35609	9.72311
ATP2C2	2.30842	0.000128641	0.000644987	6.69267	5.75313
KLHL31	3.63135	0.000131252	0.000655917	5.60734	5.00953
AUNIP	2.08919	0.000131618	0.000657407	6.44311	5.65464
RPS6KA6	2.65676	0.000132197	0.000659788	6.7213	5.74175
ASPHD1	2.56719	0.000133538	0.000665961	5.70389	5.14724
TRIM50	4.76443	0.000134513	0.000670133	5.457	4.79307
RASAL1	2.80386	0.000139881	0.000693467	6.2778	5.24854
FZD6	2.36191	0.000139982	0.000693613	8.5546	7.04927
RASSF9	7.11189	0.000141891	0.000702889	5.68055	4.74173
KIR3DL1	-3.27824	0.000143396	0.000709613	6.70222	9.23526
CLDN23	5.70248	0.000143463	0.000709646	5.50345	4.74173
SFTPA1	7.05151	0.00014365	0.000710323	6.29186	5.00944
ACCSL	-5.04032	0.000144307	0.000713027	4.81635	5.53051
BIRC5	3.21007	0.0001447	0.000714783	6.69743	5.30651
ADIRF	2.17231	0.000145011	0.000715951	6.64904	5.71989
PTPRG	2.76434	0.000146993	0.000724438	8.85983	6.48786
PLA2G4F	5.02943	0.000149924	0.000737377	5.59767	4.81304
CHL1	3.82625	0.000151113	0.000742463	7.77065	5.97277
SLC6A9	3.91761	0.000151221	0.000742802	7.3251	5.4534
PCDHB8	8.97099	0.000151259	0.000742802	6.4838	4.74173
TYMS	2.53138	0.000151972	0.000745736	7.72969	6.24963
ATP6V0A4	5.71943	0.000152113	0.000746235	5.54659	4.79222
FAM110C	4.52946	0.000152385	0.000747188	5.73196	4.8803
TMC7	3.86362	0.000158782	0.0007754	6.15539	5.1754
HOXA3	2.94817	0.000158927	0.000775912	6.13183	5.33652
ADAMTSL3	5.54858	0.000159305	0.000777559	5.88164	4.82896
OGDHL	4.66002	0.000160363	0.00078193	5.7099	4.87881
BSPRY	2.57915	0.000160469	0.000782252	6.6637	5.68811
ERC2	3.24653	0.000160793	0.000783631	5.9886	5.1733
LPL	2.38512	0.000160995	0.000784417	7.6348	6.28254
CSMD3	4.87628	0.000161381	0.000786101	5.81088	4.95819
MPZL2	2.61131	0.000162255	0.000789361	8.06846	6.59425
LOC102724476	-2.15611	0.00016347	0.000794069	5.30162	5.9065
LOC100126784	4.58728	0.000164267	0.000797337	5.40488	4.79222
RGMA	2.71738	0.000167459	0.00081201	5.86707	5.19639
PRR26	5.85081	0.000168064	0.000814537	5.63312	4.79307
EFNB3	6.25142	0.0001692	0.000819422	5.59681	4.74173
CAPN11	-4.11646	0.000170578	0.000824648	4.86005	5.49105
EPS8L1	2.18157	0.000171973	0.000830765	7.3503	6.13357
GPR1	2.71201	0.000173234	0.000836225	5.99899	5.25427
EFCAB4A	2.26464	0.000175236	0.000844832	6.26117	5.46978
ARSE	4.88653	0.000175906	0.000847852	6.25428	4.88329
FOLH1	4.74493	0.000176717	0.000851122	5.67602	4.85856
C10orf55	5.10464	0.000177951	0.000856638	5.67051	4.82399
LRRC32	2.82617	0.000179513	0.000863076	5.79036	5.07402
ELN	3.30793	0.000180517	0.000867472	6.72499	5.3383
SLC6A8	2.15217	0.000181055	0.000869623	9.55714	7.37629
GPR87	3.46395	0.000181233	0.000870264	6.01614	5.18297
APOC1P1	4.95515	0.000181991	0.000873249	5.46785	4.79222
ELFN1	5.3863	0.000182793	0.000876661	5.923	4.88364
GADL1	5.2613	0.000185043	0.000886569	5.4913	4.79307
RORC	2.16474	0.000186253	0.00089192	6.70386	5.823
ELOVL2	5.18138	0.000187107	0.000895789	5.52343	4.79307
PLEKHA4	2.06272	0.000187274	0.000896368	6.46465	5.60754
BHMT2	3.42427	0.000187554	0.000897258	6.02951	5.17079
BAI3	-3.02449	0.000187771	0.000897851	5.3435	6.29647
TMEM47	6.72215	0.000193141	0.000921246	5.74431	4.74173
NXF3	3.1343	0.000198755	0.000943817	6.07171	5.24792
CNGB1	2.89212	0.000200015	0.000948398	5.73316	5.08172
NTN1	2.13618	0.000204912	0.000969469	5.85891	5.28126
DNAAF3	5.18323	0.000206075	0.000974493	5.75311	4.89992
SHC2	3.57268	0.000206902	0.000978165	6.28762	5.00874
MKI67	2.25544	0.000208446	0.000984741	12.382	10.2034
SPNS2	2.5909	0.00021192	0.000999437	6.95553	5.91592
C7	6.64187	0.000212398	0.00100145	5.63356	4.79999
TKTL1	-2.64785	0.000212468	0.00100153	5.97799	7.35733
DACT2	5.11527	0.000214238	0.00100913	5.4074	4.74173
[truncated: 696 more rows]

## Sheet: B
Table S2_Differential Expressed Genes (DEG) in LUAD PBMC vs HD PBMC
genes	log2FoldChange	pvalue	padj	mean_HD	mean_PBMC
LARS	3.49149	6.22805e-109	5.58999e-105	9.11	12.5743
ATP2B4	2.90917	5.12896e-106	3.069e-102	9.68781	12.5736
OGDH	2.33806	1.32239e-102	5.93456e-99	9.81724	12.1334
DHODH	2.73951	1.03628e-69	2.65746e-66	6.09865	8.59938
NHSL2	5.0492	8.09756e-64	1.6151e-60	5.58875	10.1721
PIK3CA	-2.0499	5.51984e-56	6.60578e-53	12.8133	10.763
C2orf43	3.05807	5.13362e-53	5.15111e-50	5.73491	8.4367
SMARCAL1	2.46199	8.58771e-53	8.11357e-50	7.43153	9.80891
TBCK	2.12439	9.4114e-53	8.4472e-50	8.06339	10.1263
HLA-G	4.56321	4.75024e-50	3.55298e-47	5.64647	9.76865
HSD17B4	2.87641	3.21348e-49	2.13649e-46	9.7228	12.5552
RNASEL	2.56446	4.71733e-47	2.73164e-44	7.16512	9.61637
GNRHR2	5.6537	1.0916e-45	5.7633e-43	4.74145	9.55708
MN1	-4.8024	5.88138e-45	3.01647e-42	8.32516	4.43057
ASXL2	2.27435	6.26288e-45	3.12291e-42	9.33652	11.6015
ARFRP1	2.27809	2.97001e-44	1.40302e-41	7.6094	9.79335
C17orf62	2.81176	8.40765e-44	3.59347e-41	7.15393	9.85336
CARD8	2.58021	6.83298e-43	2.60976e-40	8.82072	11.3593
SLC38A10	2.71229	7.60931e-43	2.84572e-40	7.85517	10.4985
SNX9	-2.9922	4.69834e-42	1.6868e-39	12.886	9.89852
NRIP1	-2.55544	5.90125e-42	2.0542e-39	12.4652	9.88973
TOM1L2	2.38985	1.17605e-41	3.90948e-39	7.10974	9.38855
C15orf48	-5.77572	1.7526e-41	5.72016e-39	9.5865	4.56052
ATG16L2	2.2396	8.28574e-41	2.65602e-38	9.08578	11.2823
HSF2	-2.10317	1.67972e-40	5.19874e-38	11.4387	9.33031
ELL2	-2.92562	8.28576e-40	2.47896e-37	11.3903	8.52818
POLR3GL	2.12084	4.92506e-38	1.30014e-35	8.63252	10.7387
IKBKE	2.32127	1.1046e-37	2.83266e-35	8.07911	10.3625
PIN4	2.84186	1.33114e-37	3.36553e-35	6.11974	8.7026
CHM	2.96987	4.39706e-37	1.09627e-34	6.89823	9.72488
ENOX2	2.82642	6.38838e-37	1.57093e-34	6.19861	8.80923
PECR	2.27932	7.33824e-37	1.78012e-34	6.44547	8.56667
RGS14	2.98923	8.88528e-37	2.08724e-34	6.93656	9.81888
ANXA4	3.58384	1.59794e-36	3.67751e-34	6.51606	9.90737
SKIL	-3.18963	3.7894e-36	8.50293e-34	12.4327	9.23365
DNASE1	4.05421	1.31423e-34	2.65076e-32	5.16901	8.63475
ZNF439	2.13417	5.13358e-34	1.0195e-31	7.18093	9.20833
FAM178A	2.01273	8.79773e-34	1.68009e-31	8.51363	10.486
SKAP2	2.41797	1.56583e-33	2.83921e-31	8.9921	11.3692
DHRS3	-2.61482	2.33351e-33	4.14742e-31	10.7447	8.15278
FAM111A	2.53892	3.88931e-33	6.84481e-31	8.34224	10.8356
HEXDC	2.00978	5.12482e-33	8.84574e-31	7.03191	8.91145
C14orf159	2.41531	1.96928e-32	3.18473e-30	7.99234	10.3488
ZNF518A	2.22862	3.338e-32	5.3027e-30	8.25381	10.434
ATG2A	-2.72064	1.64302e-31	2.47848e-29	13.2654	10.5243
CRY1	-2.28943	8.04682e-31	1.13739e-28	11.0603	8.78451
FIG4	2.52581	1.42362e-30	1.99652e-28	8.99729	11.4683
GADD45A	-2.71513	2.07608e-30	2.82331e-28	8.8573	6.34774
ZBTB43	-2.41438	3.20475e-30	4.32544e-28	10.6531	8.29375
CDKN1A	-3.00043	1.82749e-29	2.32661e-27	11.876	8.85457
PPP1R3B	-2.21715	5.25992e-29	6.37979e-27	9.88138	7.73739
TGIF1	-2.20545	1.01604e-28	1.21592e-26	11.924	9.70651
INTS7	2.89032	1.7992e-28	2.11094e-26	6.67412	9.41237
GMEB2	-2.08408	6.68136e-28	7.54321e-26	9.6312	7.59551
ZNF252P	3.3156	1.01931e-27	1.12255e-25	5.32535	8.23252
DUSP10	-3.22551	1.13052e-27	1.23744e-25	11.4439	8.22011
GIMAP8	3.74892	1.15437e-27	1.25589e-25	7.13132	10.679
HEMK1	2.44282	2.16345e-27	2.28633e-25	6.0809	8.28544
SIGLEC7	3.009	2.64473e-27	2.74425e-25	6.12431	8.8182
ZNF585B	2.59723	2.98656e-27	3.04612e-25	6.67029	9.13478
FGL2	4.22687	6.43507e-27	6.45341e-25	8.89916	13.1342
IFT80	2.12203	8.71405e-27	8.59483e-25	8.03404	10.0931
ELP4	2.25209	1.52516e-26	1.43341e-24	6.7264	8.85171
CAMK2A	-10.1635	1.8838e-26	1.71655e-24	8.23654	2.94238
SMAD7	-3.7456	2.74097e-26	2.4358e-24	10.1534	6.57663
CEP89	2.94986	4.15213e-26	3.65367e-24	5.68104	8.27254
SIGMAR1	2.05367	5.3252e-26	4.618e-24	6.50039	8.4091
TRIM5	2.4416	1.04116e-25	8.81596e-24	6.1965	8.45848
NBEAL1	2.19941	1.30521e-25	1.08976e-23	7.87089	9.99932
STK17A	-2.22987	1.38005e-25	1.1327e-23	12.3007	10.0663
ARL13B	2.3698	4.98953e-25	3.92838e-23	5.9185	7.99672
CLPB	2.14433	6.27128e-25	4.8524e-23	7.16696	9.17452
DPYSL2	2.7763	6.7783e-25	5.2222e-23	8.90043	11.5581
GVINP1	3.46054	7.15149e-25	5.48617e-23	8.09948	11.4761
ATP10D	2.99827	8.09653e-25	6.15851e-23	7.39921	10.2554
ZNF846	2.396	8.37278e-25	6.34176e-23	5.92207	8.03896
APBB1IP	2.0274	1.03652e-24	7.75271e-23	10.7144	12.715
LYST	2.58296	1.34809e-24	9.95863e-23	11.7635	14.2901
SERPINB2	-4.06114	3.26045e-24	2.29523e-22	9.66968	5.90593
FOSL2	-2.24366	3.53085e-24	2.47587e-22	13.0512	10.7835
RNF103	-2.07734	4.67328e-24	3.25155e-22	11.3473	9.26696
GABARAPL1	-3.33312	5.00791e-24	3.47093e-22	12.6995	9.30831
TNFRSF21	-3.97211	5.3838e-24	3.7171e-22	9.41762	5.92321
HSPA13	-2.14951	8.48466e-24	5.76925e-22	10.4062	8.28998
FKTN	2.59084	1.14613e-23	7.73464e-22	6.39804	8.79373
INTS3	2.59244	1.25348e-23	8.36479e-22	9.12995	11.7129
PARP10	2.14446	1.28336e-23	8.53242e-22	7.60114	9.68917
PTGDR	3.34626	1.46548e-23	9.70735e-22	5.86032	8.8311
CHD1	-2.20903	1.67976e-23	1.10452e-21	15.0951	12.8816
ARSI	-10.1555	1.98386e-23	1.29499e-21	7.63303	2.82987
ZNF512	2.17382	2.33109e-23	1.50523e-21	8.35457	10.4756
FARS2	2.35254	4.66021e-23	2.94562e-21	6.61677	8.84277
ICOSLG	-3.29229	4.76351e-23	3.00034e-21	9.78112	6.60077
SC5D	-2.00628	5.43246e-23	3.39784e-21	11.0269	9.08415
CX3CR1	4.13564	1.03859e-22	6.36306e-21	6.9333	10.7984
SLC25A20	2.84484	1.54762e-22	9.32257e-21	6.70809	9.37363
PFKFB3	-2.66144	2.66221e-22	1.59298e-20	13.7166	10.971
SULT1B1	4.03222	3.94951e-22	2.31692e-20	5.02525	8.55476
SASH1	4.54842	4.26667e-22	2.49482e-20	5.31791	9.14715
CCT6B	-2.04547	6.95067e-22	3.961e-20	7.66873	5.86765
BCKDHB	2.18133	7.54811e-22	4.24753e-20	7.17779	9.31658
SLC7A5	-4.00459	8.50847e-22	4.72865e-20	13.2886	9.25632
JOSD1	-2.31788	1.40889e-21	7.73422e-20	10.3652	8.04803
KIAA0825	2.47935	1.46365e-21	8.01035e-20	5.88202	8.0687
ATG4C	2.40446	1.6422e-21	8.79976e-20	6.59609	8.83264
NCF1	2.62999	3.27743e-21	1.71525e-19	11.0757	13.6705
RNF170	2.64543	4.77049e-21	2.46078e-19	7.0364	9.54727
SMURF1	-2.35347	7.27069e-21	3.6869e-19	12.4082	10.0638
RPUSD3	2.28323	7.97579e-21	4.03305e-19	5.46641	7.37186
BTN3A3	2.14477	8.79793e-21	4.42386e-19	9.98721	12.1084
MRPL24	2.39907	9.91868e-21	4.92173e-19	5.96429	8.11294
CCRN4L	-3.1486	1.39677e-20	6.77661e-19	9.99053	6.98166
IFITM10	-4.02918	1.88969e-20	9.07003e-19	7.77786	4.62452
RHBDD2	-2.21152	2.11726e-20	1.00282e-18	10.5761	8.41688
MKKS	2.07414	3.04497e-20	1.41241e-18	6.29548	8.17853
PDSS2	2.39217	5.2604e-20	2.38458e-18	5.67593	7.84319
PVRIG2P	-9.3003	5.55289e-20	2.50452e-18	6.86815	2.82987
FMNL2	2.74616	5.61121e-20	2.52448e-18	5.87665	8.3413
MPV17L2	-2.05773	8.74412e-20	3.86615e-18	9.27056	7.26413
WDR92	2.74826	1.0842e-19	4.71246e-18	5.88624	8.33157
PGBD2	2.03996	1.1358e-19	4.88937e-18	6.41878	8.27667
FAM173B	3.44413	1.41562e-19	6.05044e-18	4.52007	7.04948
ZNF485	3.74653	1.63562e-19	6.9576e-18	4.09639	6.62554
DUSP4	-5.3857	1.67688e-19	7.08276e-18	9.46154	4.78506
SAMHD1	2.34897	1.85558e-19	7.80081e-18	12.864	15.1776
RAB33A	-2.86271	1.86651e-19	7.82846e-18	8.51717	5.92538
IPO13	2.33241	1.92623e-19	8.02268e-18	6.38547	8.52296
CEP41	2.79321	2.37058e-19	9.73781e-18	5.87522	8.37108
ZNF133	2.43625	3.13068e-19	1.27435e-17	5.00055	6.90069
ZNF674	2.16648	3.52406e-19	1.428e-17	5.99899	7.95578
CPPED1	2.37553	4.15249e-19	1.66387e-17	8.1871	10.4515
LAMB3	-4.45585	4.44276e-19	1.77227e-17	9.84228	5.65586
CMKLR1	4.44657	5.08964e-19	2.01207e-17	4.5377	8.09594
WBP1L	2.09427	7.21455e-19	2.81214e-17	6.14003	8.02322
ZNF546	2.53565	7.63216e-19	2.95269e-17	5.12193	7.14961
HFE	3.63693	7.95892e-19	3.06841e-17	5.04286	7.98986
PHACTR1	-3.44595	8.47332e-19	3.25706e-17	10.233	6.79866
SCIMP	2.82262	8.62358e-19	3.30773e-17	7.37059	10.026
ZNF821	-2.36028	8.71963e-19	3.33744e-17	9.2074	6.97775
S100A8	4.14128	8.80235e-19	3.36194e-17	8.66745	12.5799
DDX58	2.21253	9.31347e-19	3.54208e-17	8.80204	10.9816
IFT27	2.70151	9.29679e-19	3.54208e-17	5.07094	7.29741
DUSP8	-3.84009	9.40045e-19	3.56007e-17	9.82494	6.07233
FCRL6	3.42172	9.67183e-19	3.64746e-17	6.22671	9.39589
POP5	2.02431	1.02046e-18	3.84029e-17	6.04331	7.83771
SAMD9L	2.63907	1.47786e-18	5.50396e-17	8.63039	11.2372
VPS45	2.10971	1.61634e-18	5.99483e-17	7.51537	9.53095
LAMA2	2.63447	1.65685e-18	6.11977e-17	5.43067	7.62035
IGSF6	3.35382	1.95998e-18	7.16572e-17	7.52091	10.6822
GIMAP4	2.72416	2.10995e-18	7.66713e-17	9.36851	12.0359
PAQR8	3.33473	2.71747e-18	9.77583e-17	4.39152	6.74906
NSUN5P2	2.62951	3.50209e-18	1.24487e-16	5.58357	7.7708
MICAL2	2.82801	4.23146e-18	1.49232e-16	8.48295	11.2347
AIM2	2.82069	6.48996e-18	2.25778e-16	5.69477	8.16966
CHEK2	2.12013	6.8923e-18	2.37018e-16	6.05773	7.90429
ZNF395	-2.13762	7.2095e-18	2.47453e-16	9.86934	7.78882
ADCK1	2.89325	7.36211e-18	2.52208e-16	4.92012	7.21838
DISC1	2.77271	1.2639e-17	4.2329e-16	7.83166	10.4611
RELB	-2.20848	1.42875e-17	4.75834e-16	10.2841	8.08145
IER3	-3.18287	1.76327e-17	5.78656e-16	12.1019	8.82702
HAUS3	-2.00079	2.16502e-17	7.03418e-16	12.1861	10.1854
ABCC5	2.55047	2.16695e-17	7.03418e-16	7.44904	10.0216
TMOD2	2.30312	2.23165e-17	7.23111e-16	6.87231	9.01881
ZNF573	2.28512	2.29235e-17	7.40107e-16	5.88911	7.94533
CALML4	2.67609	2.33944e-17	7.53956e-16	5.103	7.19684
ERF	-2.21244	2.35621e-17	7.58e-16	10.8073	8.59736
C21orf59	2.41622	3.21365e-17	1.01923e-15	6.90768	9.21777
MET	-6.17783	3.41383e-17	1.07701e-15	8.91101	4.11993
C1GALT1C1	2.13863	3.45391e-17	1.08583e-15	5.11385	6.77627
TLR5	2.80542	3.58501e-17	1.12312e-15	6.8501	9.5077
DPAGT1	2.2148	4.24854e-17	1.31492e-15	7.06346	9.1471
KRCC1	2.72989	4.49708e-17	1.38945e-15	7.34067	9.97861
SEMA3F	-6.15662	4.70198e-17	1.44161e-15	7.58381	3.43903
MED26	-2.1693	4.70604e-17	1.44161e-15	9.01501	6.9658
CCR2	4.84104	5.2524e-17	1.59807e-15	6.28961	10.6736
GLCE	2.34513	7.64596e-17	2.29136e-15	5.86028	7.89709
ARFIP1	3.06595	8.47518e-17	2.52721e-15	5.60428	8.28303
NRIP3	-2.86289	9.4289e-17	2.79304e-15	6.78656	4.62296
SCML1	-2.30275	1.79985e-16	5.15298e-15	9.54708	7.30215
CHEK1	-2.66672	2.28734e-16	6.46615e-15	9.15441	6.61923
SAMSN1	-2.48497	3.16547e-16	8.80982e-15	13.4689	11.0199
ZMAT1	2.11165	4.57288e-16	1.24943e-14	7.84947	9.83457
ARID5A	-2.63063	6.2056e-16	1.67766e-14	11.2847	8.69288
SHB	-3.43244	6.36397e-16	1.71531e-14	7.75484	4.95688
TLE3	-2.07934	7.25487e-16	1.94087e-14	12.955	10.8378
ANXA6	2.14101	1.00717e-15	2.66663e-14	11.5123	13.6575
SLAMF6	3.01079	1.0911e-15	2.88034e-14	7.27973	10.2023
RCAN1	2.26914	1.35709e-15	3.5602e-14	5.66389	7.56679
RSPH3	2.39308	1.63666e-15	4.24562e-14	5.8722	7.96833
N4BP3	-3.75451	1.69117e-15	4.37943e-14	7.52713	4.54849
GRIK1	3.47099	1.69312e-15	4.37943e-14	4.52989	7.03573
ZFP69	2.81179	1.82461e-15	4.69922e-14	5.49714	7.93294
C1RL	2.05656	1.90362e-15	4.89568e-14	6.21631	8.00211
BTN3A2	2.29399	2.03504e-15	5.21871e-14	10.0874	12.4785
RGS16	-4.17261	2.50739e-15	6.37537e-14	7.96516	4.68007
SPRED1	2.31347	2.88435e-15	7.294e-14	6.31958	8.35892
FGD2	2.60462	2.89053e-15	7.29787e-14	7.82906	10.2878
GIMAP1	2.14479	2.94331e-15	7.41028e-14	5.47278	7.23067
DET1	2.11859	2.97394e-15	7.47691e-14	5.11451	6.78342
CCDC61	2.72811	3.47864e-15	8.67291e-14	4.92578	7.03868
ATG10	2.02438	3.85849e-15	9.54046e-14	5.6052	7.30966
METRNL	-2.05265	3.96877e-15	9.79964e-14	10.1129	8.11667
HEATR5A	2.51802	4.05937e-15	9.99585e-14	7.48403	9.8875
AP1S1	2.97766	4.07071e-15	1.00101e-13	4.59723	6.7789
BMP2K	2.06154	4.17274e-15	1.0219e-13	9.1971	11.2267
OLR1	-5.48891	6.65193e-15	1.58157e-13	10.2263	4.89706
MSRB2	3.53659	7.30344e-15	1.72053e-13	4.20229	6.4911
GADD45G	-4.28462	7.71696e-15	1.81318e-13	6.88282	4.08697
NCS1	-3.81006	7.9948e-15	1.86625e-13	6.16753	3.92156
RTN1	3.18061	8.11491e-15	1.88937e-13	6.32507	9.17469
SEMA3C	2.51727	8.35224e-15	1.94211e-13	5.75319	7.94041
MOSPD2	2.77561	9.96635e-15	2.30549e-13	7.01288	9.54162
LRRC32	-6.00078	1.00509e-14	2.32206e-13	7.2599	3.46377
JAG1	-2.03457	1.06273e-14	2.44578e-13	10.0011	8.03312
SLX4IP	2.87648	1.07768e-14	2.47701e-13	5.13061	7.45407
GAB2	-2.15323	1.1166e-14	2.55992e-13	12.7564	10.5831
MNDA	3.12376	1.15084e-14	2.63169e-13	9.29658	12.3028
ZNF283	2.65607	1.58504e-14	3.55202e-13	5.33617	7.57688
ARSD	3.00038	1.67366e-14	3.72753e-13	5.47582	8.01108
TRMT1L	2.29131	1.67729e-14	3.73098e-13	7.65228	9.86074
XRCC4	2.2728	1.68524e-14	3.74403e-13	6.33048	8.42577
UBTD2	2.35178	1.90351e-14	4.20293e-13	5.42727	7.38371
HSDL2	2.04929	1.97038e-14	4.3346e-13	6.68998	8.56253
LIF	-5.22132	2.06612e-14	4.51204e-13	7.70905	3.7977
GNA15	-2.02598	2.86489e-14	6.10781e-13	10.3419	8.30358
OAS1	3.08702	3.08283e-14	6.51058e-13	7.00212	9.84037
MTSS1L	-2.31398	3.23265e-14	6.81094e-13	7.92737	5.88033
SEMA7A	-3.04443	3.39863e-14	7.14388e-13	9.08923	6.35888
MSS51	2.31521	3.72863e-14	7.77145e-13	5.51232	7.44154
SEMA6B	-4.65418	3.89198e-14	8.07687e-13	9.56055	5.18627
VEGFA	-3.48472	4.01063e-14	8.29433e-13	12.477	8.89467
FMO4	3.36144	4.09632e-14	8.45207e-13	4.37549	6.74118
MEGF9	2.23344	4.11555e-14	8.48199e-13	9.08092	11.2628
INPP4B	2.6104	4.19518e-14	8.6362e-13	9.33146	11.8699
SMIM14	2.69689	4.92737e-14	1.01087e-12	5.16355	7.34936
MLXIPL	-4.9845	5.11382e-14	1.04673e-12	5.71495	3.19511
CNIH2	-2.99891	5.64912e-14	1.14714e-12	6.50442	4.39146
NLRC4	2.91623	6.13066e-14	1.24072e-12	6.41643	9.06538
PI4K2A	-2.0838	7.04475e-14	1.41297e-12	10.7798	8.6703
SNORD45A	-2.1289	7.11207e-14	1.42329e-12	7.30115	5.50144
BRCA1	2.01697	7.20303e-14	1.43828e-12	6.65361	8.52637
BMPR1A	2.04611	7.20067e-14	1.43828e-12	7.04412	8.97063
PRH1	3.11492	7.93803e-14	1.58153e-12	4.99559	7.4258
KIAA1107	2.43261	8.66311e-14	1.71646e-12	5.53406	7.59193
RASSF4	3.04143	8.69021e-14	1.71993e-12	6.80131	9.67018
SPRY1	-3.32523	8.89879e-14	1.75734e-12	7.97791	5.12271
SAC3D1	3.36879	9.71823e-14	1.90658e-12	4.25284	6.50071
UQCC2	2.52993	1.11969e-13	2.17764e-12	4.82927	6.73531
CSF1R	2.84973	1.18504e-13	2.30224e-12	9.07531	11.9393
SDC2	-5.31513	1.5812e-13	3.01958e-12	7.42577	3.94604
LOC150776	-2.17738	1.81238e-13	3.43185e-12	10.3512	8.1713
PLK3	-2.20145	1.83474e-13	3.47053e-12	11.8638	9.64905
PRR5L	2.05101	1.83822e-13	3.47345e-12	6.81188	8.71646
HDHD2	2.31866	1.8456e-13	3.479e-12	7.29145	9.64726
ZNF382	2.7937	1.85e-13	3.48107e-12	4.83123	6.97171
NAGK	2.04131	1.89836e-13	3.55715e-12	9.44195	11.4047
S100A9	3.30544	2.00868e-13	3.75212e-12	9.76857	12.8328
XYLB	2.87749	2.08152e-13	3.87206e-12	4.32242	6.33142
LMAN2L	2.12523	2.13321e-13	3.95591e-12	5.1437	6.83657
H2AFX	-2.26298	2.21833e-13	4.10528e-12	10.3931	8.14151
HIF1A	-2.59682	2.42425e-13	4.46795e-12	15.5379	12.8697
KMO	2.21574	2.46931e-13	4.54166e-12	6.14376	8.11036
ZNF860	3.0449	2.47634e-13	4.54993e-12	5.61281	8.28912
DISP1	3.46827	2.68833e-13	4.90429e-12	5.06223	8.00097
RGPD5	-2.35093	3.01924e-13	5.47458e-12	16.1719	13.7451
PLIN2	-2.65822	3.10764e-13	5.6122e-12	11.6385	9.03459
ZBTB21	-2.32824	3.66688e-13	6.56274e-12	11.3466	8.95408
C9orf64	2.00987	4.11766e-13	7.3112e-12	5.67657	7.39005
FUT5	-5.30733	4.12571e-13	7.31825e-12	9.02717	4.38815
STYXL1	2.40974	4.71409e-13	8.31264e-12	6.27743	8.48796
LILRB1	2.30371	5.60268e-13	9.76444e-12	9.41914	11.6094
AMICA1	2.77505	5.61913e-13	9.78362e-12	10.3741	13.1041
MYBPC2	-4.35852	5.74196e-13	9.98413e-12	6.897	3.94675
HIST1H2BB	-2.21292	7.00768e-13	1.20493e-11	9.03031	6.8825
HN1L	2.36854	8.1616e-13	1.39267e-11	5.49599	7.52026
MYOF	3.36308	8.18127e-13	1.3947e-11	7.97828	11.1899
GSTM4	2.71277	1.10265e-12	1.84126e-11	6.86505	9.23162
C19orf45	-4.93431	1.17833e-12	1.95853e-11	6.07056	3.48554
TMEM144	4.62243	1.3063e-12	2.16523e-11	4.62104	7.83926
TTLL11	2.49519	1.39196e-12	2.30084e-11	4.75156	6.61416
NLN	2.5279	1.42537e-12	2.34957e-11	6.87869	9.16785
CD163	3.79943	1.44173e-12	2.37218e-11	9.17381	12.7327
NHS	3.16454	1.45401e-12	2.38802e-11	5.87687	8.6767
THBD	-3.58419	1.60417e-12	2.62502e-11	10.8172	7.29722
PNPO	2.21418	1.61266e-12	2.63411e-11	6.18409	8.15515
GCSAM	3.02939	1.8067e-12	2.93502e-11	4.98659	7.37408
ZNF175	2.59113	2.30543e-12	3.69177e-11	5.49875	7.79782
FAM65B	2.62436	2.35937e-12	3.77478e-11	10.783	13.4099
HIC1	-3.0923	2.4691e-12	3.9398e-11	7.48279	4.98856
MYO15A	-2.19324	2.67267e-12	4.23827e-11	7.92068	5.95992
DGKG	2.72641	2.68454e-12	4.25333e-11	6.02744	8.34949
SPRED2	-2.10343	2.95616e-12	4.65084e-11	6.90224	5.23994
HK3	2.60881	3.19172e-12	4.98647e-11	9.11305	11.5755
ZKSCAN3	2.09284	3.42688e-12	5.32145e-11	5.4201	7.16038
SYN1	-3.45946	3.54454e-12	5.48991e-11	6.85851	4.37629
PHLDA1	-3.21172	4.06137e-12	6.26337e-11	9.45399	6.37084
IRF2BP2	-2.08234	4.18708e-12	6.44064e-11	12.2592	10.1012
LZTS3	-3.81826	4.26106e-12	6.54322e-11	7.66665	4.62717
CXCL16	-2.62007	4.52064e-12	6.92406e-11	10.1769	7.60033
IDH1	2.6908	4.65795e-12	7.10406e-11	6.85558	9.27546
FAM71A	-4.45005	4.69162e-12	7.14329e-11	5.96107	3.38403
HRSP12	2.84541	5.8855e-12	8.90064e-11	4.2835	6.22791
FSD1L	2.13879	6.1293e-12	9.25375e-11	5.98688	7.8621
TRPM2	3.11099	6.28968e-12	9.47199e-11	6.50012	9.36389
CD36	2.79052	6.38205e-12	9.59499e-11	10.3674	13.0793
LOC100129697	3.27966	6.7465e-12	1.00922e-10	5.55294	8.3364
CREB5	3.5651	7.54915e-12	1.11719e-10	7.26772	10.5553
HCK	2.29838	8.52248e-12	1.25708e-10	9.49676	11.6702
TTC16	2.79595	9.11527e-12	1.33683e-10	6.61213	9.1158
CREM	-2.20682	9.25377e-12	1.35457e-10	8.63881	6.62228
MS4A6A	2.463	9.25884e-12	1.35457e-10	10.1857	12.5712
LOC101060181	2.01675	1.02385e-11	1.49423e-10	5.55754	7.24252
SLC15A2	3.20317	1.15695e-11	1.67487e-10	5.6318	8.35619
BHLHE40	-2.10458	1.31412e-11	1.89173e-10	13.3038	11.1699
MAP2K6	2.56152	1.4237e-11	2.0364e-10	6.45517	8.81506
PPIAL4C	3.85562	1.69622e-11	2.40892e-10	5.87287	9.1178
SLC2A3	-2.74818	1.75514e-11	2.48671e-10	15.4243	12.5814
TAS2R14	3.3894	1.86926e-11	2.62559e-10	4.03428	6.14505
BRI3BP	2.28364	2.07144e-11	2.89599e-10	4.68953	6.30941
CEP57L1	2.02354	2.08741e-11	2.91604e-10	5.96501	7.73543
C3orf18	2.61614	2.25018e-11	3.11674e-10	4.28968	6.01295
UNC5A	4.44255	2.49493e-11	3.43982e-10	3.50605	5.94059
CYBB	2.24468	2.56459e-11	3.52774e-10	12.6179	14.8018
FCGR3A	2.35226	2.67943e-11	3.67164e-10	9.99242	12.3748
HSPA1A	2.15917	2.77806e-11	3.80099e-10	11.6708	13.7377
RP11-35G9.3	2.69876	2.83594e-11	3.87428e-10	4.55019	6.60987
MECR	2.00651	2.97666e-11	4.04191e-10	5.17541	6.73665
TMEM229B	2.3224	2.97558e-11	4.04191e-10	5.11534	6.93849
TEX14	-3.58647	3.0831e-11	4.17697e-10	9.1505	5.92726
TNFRSF10C	2.95334	3.30055e-11	4.43807e-10	5.7564	8.27194
PDE2A	-3.30495	4.06875e-11	5.40223e-10	8.69479	5.61713
HERC2P3	2.03138	4.45249e-11	5.87264e-10	10.439	12.4463
IQCG	2.29755	4.75793e-11	6.24796e-10	6.90634	9.06195
SERF1A	-24.5212	5.18594e-11	6.77532e-10	5.29771	2.82987
ZNF331	-2.93431	6.10315e-11	7.88751e-10	11.5852	8.60382
F2RL2	2.97929	6.30427e-11	8.12989e-10	5.60394	8.16082
ADAMTS2	8.17685	7.75242e-11	9.88379e-10	3.55088	8.28366
PTAFR	2.41629	8.2776e-11	1.0516e-09	7.24233	9.56882
LRRN3	3.02896	8.60611e-11	1.08718e-09	5.94536	8.3795
ARHGAP29	3.31666	9.51154e-11	1.19316e-09	4.32516	6.65109
TRAF4	-2.79	1.02185e-10	1.27561e-09	9.88354	7.13418
CACNB2	2.48817	1.04874e-10	1.30464e-09	5.1941	7.17418
LOC100128573	2.374	1.0551e-10	1.31164e-09	4.95157	6.77931
L3HYPDH	2.15684	1.10113e-10	1.36791e-09	5.29999	7.12104
STK32C	2.32892	1.16744e-10	1.4423e-09	5.3904	7.34782
ADRA2B	-4.21883	1.29173e-10	1.58821e-09	6.14012	3.68407
AGBL2	2.09052	1.33243e-10	1.63266e-09	5.07935	6.71591
UGDH	2.52688	1.42085e-10	1.7339e-09	5.80887	8.06174
RPL23AP82	2.33684	1.47918e-10	1.80019e-09	5.95506	8.11341
HOOK2	2.18608	1.61682e-10	1.95182e-09	5.84262	7.75214
IL32	2.61771	1.66562e-10	2.00802e-09	9.24263	11.7844
C1orf162	2.0318	1.68271e-10	2.02591e-09	10.5074	12.4903
RAB30	-2.45564	1.73993e-10	2.08658e-09	10.106	7.68017
C9orf84	5.08591	1.91688e-10	2.28486e-09	3.83898	6.83047
HIST1H2BO	-2.2992	2.00573e-10	2.38443e-09	10.8434	8.56391
PI16	3.53833	2.03615e-10	2.41739e-09	4.04643	6.27035
SIRPD	3.66128	2.05729e-10	2.44087e-09	4.2803	6.68913
GEM	-5.4545	2.12154e-10	2.51212e-09	5.68599	3.18853
EXOSC5	2.59985	2.32498e-10	2.73498e-09	4.36772	6.05201
SLC27A3	2.1133	2.46323e-10	2.88815e-09	7.38412	9.40454
SGMS2	2.34556	2.52823e-10	2.95855e-09	6.6215	8.81971
TRMT10A	2.03975	2.59617e-10	3.03411e-09	5.35546	7.04303
ZNF366	4.7188	2.59786e-10	3.03411e-09	3.6647	6.20276
IL1A	-4.85887	2.70518e-10	3.15329e-09	6.42218	3.55191
RNASE2	3.81279	2.70765e-10	3.15412e-09	7.01765	10.3952
HGF	2.55477	2.77333e-10	3.22436e-09	6.25377	8.50136
RND1	-3.56776	3.15671e-10	3.63944e-09	6.16409	3.95432
NINJ1	-2.24111	3.76276e-10	4.28859e-09	8.65459	6.51225
PMEPA1	-4.10053	3.83307e-10	4.35215e-09	7.01591	4.18963
ALDH1B1	2.03982	3.90005e-10	4.41981e-09	4.56443	5.94273
WDFY3	2.2866	4.14515e-10	4.68574e-09	9.61247	11.7528
KRBA2	2.33848	4.81479e-10	5.39516e-09	4.91481	6.74051
CIDEB	2.16256	4.98851e-10	5.55858e-09	6.27894	8.23389
IRAK2	-2.13742	5.14404e-10	5.71414e-09	9.49872	7.51255
KBTBD8	-2.65209	5.5689e-10	6.15562e-09	10.0173	7.43271
PRR5-ARHGAP8	-3.97291	6.21588e-10	6.84128e-09	8.33397	4.99145
NLRP12	2.82486	6.34389e-10	6.97789e-09	8.22558	10.9727
ZNF284	2.25796	6.51699e-10	7.1464e-09	5.65773	7.60424
ZSCAN5A	2.21672	6.54122e-10	7.16859e-09	4.59909	6.17323
CHKA	-2.04996	8.47586e-10	9.10533e-09	9.75187	7.75826
CLEC12A	2.44238	9.02816e-10	9.68128e-09	8.82153	11.235
SLC14A1	3.63304	9.23228e-10	9.85894e-09	5.32289	8.16798
LRRCC1	2.23912	9.70788e-10	1.03299e-08	6.20785	8.20765
RPGRIP1L	2.08811	1.0076e-09	1.06899e-08	6.55031	8.46322
DMD	-2.85909	1.20669e-09	1.26675e-08	8.0919	5.56942
SH3PXD2B	4.17341	1.28003e-09	1.33592e-08	4.73868	7.8856
RGS1	-3.9116	1.34382e-09	1.39843e-08	12.4844	8.48786
MSRB1	2.0905	1.38318e-09	1.43523e-08	6.59849	8.42953
ECRP	5.82093	1.46182e-09	1.51159e-08	3.25017	6.25635
RALGAPA1P	2.31898	1.52762e-09	1.5769e-08	5.1737	7.23455
ZNF429	2.2317	1.53716e-09	1.58584e-08	7.23463	9.36271
LILRA1	2.66937	1.54342e-09	1.59138e-08	9.21872	11.8052
SIRPB2	2.35135	1.64584e-09	1.6931e-08	6.36088	8.5127
FCRLA	3.86272	1.758e-09	1.80063e-08	3.91131	6.19943
SLC46A2	2.85693	1.84789e-09	1.88582e-08	5.56158	7.87419
STEAP4	5.0097	1.89387e-09	1.93164e-08	3.91102	7.57192
PVR	2.19803	1.96405e-09	1.99754e-08	4.86814	6.43592
DDIT3	-2.38632	1.96821e-09	2.00064e-08	10.1544	7.7918
SEC14L2	-2.1237	2.00024e-09	2.0309e-08	8.86063	6.905
TRIM34	2.07027	2.11726e-09	2.14003e-08	6.53889	8.43687
CD101	2.83651	2.12949e-09	2.15118e-08	6.72835	9.41996
ACYP1	2.32799	2.23237e-09	2.24878e-08	4.86622	6.65382
B3GNT5	-3.19519	2.44485e-09	2.45546e-08	9.29157	6.19316
LOC101929545	2.82261	2.59838e-09	2.59852e-08	11.0247	13.6929
TNFAIP8L2	3.32754	2.68694e-09	2.68261e-08	4.27784	6.56335
TDRKH	2.29884	3.10618e-09	3.06368e-08	5.31041	7.18947
MAFF	-3.09302	3.13621e-09	3.08991e-08	6.7167	4.49471
UST	2.40984	3.18369e-09	3.12982e-08	5.39742	7.34831
CASP5	3.48338	3.24316e-09	3.18479e-08	4.56979	7.10089
C1orf177	2.73028	3.52948e-09	3.4303e-08	4.43309	6.21019
GAPT	2.49154	3.58646e-09	3.47815e-08	6.20572	8.51654
SPINT1	2.85063	3.73464e-09	3.5997e-08	5.34617	7.74299
STAC3	2.14565	4.04914e-09	3.87453e-08	7.17574	9.15645
CPED1	2.49978	4.75997e-09	4.52096e-08	6.92707	9.09301
SIK1	22.0279	4.77807e-09	4.53576e-08	2.82987	4.89356
RGPD2	-3.55704	4.87324e-09	4.61634e-08	16.1282	12.5679
CCDC30	3.26492	5.08902e-09	4.81059e-08	4.60816	7.06344
PLD1	2.20769	5.23819e-09	4.94118e-08	7.12689	9.12422
NPL	2.2198	5.33899e-09	5.02835e-08	8.20513	10.2937
ITSN1	2.07532	5.59208e-09	5.23649e-08	7.78598	9.69414
RBM38	-2.35931	5.65395e-09	5.2889e-08	12.4028	9.90706
KCNJ2	3.83572	5.94613e-09	5.53626e-08	4.26713	6.87046
SLC2A9	2.29584	6.32352e-09	5.85423e-08	6.36181	8.38947
JAKMIP2	2.58606	6.49524e-09	6.00083e-08	6.73016	9.13731
MRVI1	2.32146	6.63626e-09	6.12547e-08	5.1206	6.95878
RP11-473M20.7	2.63583	7.93107e-09	7.24532e-08	4.78168	6.82079
HOMEZ	2.45375	8.2463e-09	7.50275e-08	4.82037	6.74191
MERTK	2.70231	8.49957e-09	7.72927e-08	7.33202	9.75739
ITGA10	2.72276	8.50999e-09	7.73483e-08	4.52897	6.42973
FAM198B	2.81397	9.0279e-09	8.18898e-08	7.93506	10.5795
RAB20	-2.57035	9.12348e-09	8.26315e-08	8.32276	5.90245
GRASP	-3.55405	9.39183e-09	8.49762e-08	10.9033	7.23558
ERI2	2.58291	9.5808e-09	8.65115e-08	4.89604	6.85865
RAB39A	2.62425	9.57942e-09	8.65115e-08	4.68315	6.52383
MYCL	2.18412	9.7438e-09	8.7895e-08	5.71144	7.58748
PMAIP1	-2.49185	9.8128e-09	8.84729e-08	8.26545	5.85769
ULBP2	-2.71263	9.88625e-09	8.90904e-08	6.94754	4.67374
NFE2	2.80877	1.02668e-08	9.21959e-08	6.34126	8.76313
GBAP1	2.23591	1.07246e-08	9.60662e-08	6.57066	8.63319
APLP1	-3.79263	1.0751e-08	9.62551e-08	5.5566	3.65667
PPIF	-2.2272	1.1218e-08	1.00037e-07	11.0131	8.73583
PLK2	-3.20162	1.13095e-08	1.00653e-07	10.6821	7.13789
TMEM218	2.35941	1.17298e-08	1.04135e-07	4.58581	6.26545
SLC7A11	-3.44411	1.17635e-08	1.04332e-07	7.1746	4.69797
OASL	-2.16355	1.22117e-08	1.07933e-07	9.5214	7.48934
PRG2	-3.26686	1.32027e-08	1.16121e-07	6.94017	4.5304
PLAU	-3.30549	1.32451e-08	1.16436e-07	5.59691	3.71773
LOC100996433	-4.07553	1.36063e-08	1.19213e-07	5.35861	3.33814
PVRL4	-4.8508	1.42652e-08	1.24304e-07	6.40427	3.4704
BCAR3	-2.64839	1.46932e-08	1.2779e-07	7.25661	5.16973
ATP8B4	2.17584	1.51488e-08	1.3156e-07	7.76097	9.72942
FZD7	-3.75469	1.51943e-08	1.31892e-07	5.53114	3.44082
TMIE	4.99212	1.76616e-08	1.51695e-07	3.27682	5.95394
GALK1	2.19438	1.85692e-08	1.58807e-07	5.44873	7.2529
TMED7-TICAM2	4.33337	1.92716e-08	1.64735e-07	3.24397	6.03564
CYBRD1	2.31505	1.96909e-08	1.6784e-07	6.5209	8.56712
MAP1LC3B2	-2.15757	2.03197e-08	1.72789e-07	8.50768	6.41731
JAKMIP1	2.85579	2.15679e-08	1.82625e-07	6.15715	8.66893
CCBL1	2.49628	2.19803e-08	1.85942e-07	4.86839	6.77878
NAPEPLD	2.07708	2.32751e-08	1.9671e-07	5.75369	7.49855
RIPK2	-2.11752	2.34926e-08	1.98082e-07	11.4372	9.19767
AAMDC	2.21103	2.38292e-08	2.00713e-07	4.42015	5.84159
EPHB2	2.17804	2.42961e-08	2.04376e-07	5.43374	7.28722
C8orf44-SGK3	2.48677	2.63523e-08	2.21155e-07	6.41805	8.60782
FAM209B	-2.12378	3.08089e-08	2.56517e-07	6.45768	4.87651
PPIAL4E	8.29518	3.30026e-08	2.73009e-07	2.82987	6.23906
OPRL1	3.18756	3.40595e-08	2.81067e-07	3.89022	5.62571
ARHGAP22	2.86027	3.51645e-08	2.88896e-07	4.36165	6.15999
C1orf195	-2.26168	3.64219e-08	2.97863e-07	5.19101	3.9865
KCNE3	2.1911	3.67149e-08	3.00123e-07	5.99823	7.80637
HK2	-2.24437	4.01964e-08	3.26796e-07	13.0789	10.9994
ATF3	-3.0481	4.0859e-08	3.31433e-07	10.7834	7.35413
STX1A	-2.38135	4.151e-08	3.35998e-07	8.78712	6.58343
IL1R1	-2.92404	4.18404e-08	3.38475e-07	8.21993	6.00281
RPP40	3.09401	4.4607e-08	3.58433e-07	3.78653	5.86182
PTGES	-5.98829	4.50651e-08	3.61952e-07	7.00398	3.36093
SERTAD1	-2.6233	4.72759e-08	3.78862e-07	7.34956	5.15152
PA2G4P4	2.21989	4.77442e-08	3.82273e-07	5.62836	7.37757
DPP4	2.00514	4.88892e-08	3.90222e-07	8.69909	10.6722
RASD1	-2.23886	4.91536e-08	3.92159e-07	6.60643	4.85457
CAMKK1	-2.0641	5.03672e-08	4.00772e-07	9.24693	7.26668
CLDN20	2.24332	5.06057e-08	4.02491e-07	4.37448	5.83966
SMAD6	-3.60358	5.55797e-08	4.3952e-07	5.85014	3.72633
SELL	2.40842	5.83788e-08	4.60439e-07	10.8688	13.2907
TMEM42	2.22053	6.48627e-08	5.07784e-07	4.40924	5.87124
COL1A1	-2.97592	6.62738e-08	5.18154e-07	7.32448	4.82534
ZNF74	2.08841	7.29914e-08	5.66235e-07	5.02366	6.62889
LAYN	-2.08294	7.43464e-08	5.76e-07	6.10387	4.64146
RGS13	-4.76983	7.66168e-08	5.91831e-07	5.29669	3.22318
HHAT	2.17627	8.34169e-08	6.39737e-07	5.42861	7.08396
OSM	-3.87238	9.82216e-08	7.47108e-07	8.85192	5.1706
ZNF605	2.27687	9.9776e-08	7.57969e-07	5.62769	7.63411
TFEC	2.18635	1.00106e-07	7.59835e-07	7.70615	9.72283
CDH12	2.40359	1.01394e-07	7.68962e-07	5.40985	7.34835
FUT3	-5.2766	1.03766e-07	7.85617e-07	6.4298	3.32714
MFSD3	2.40781	1.08047e-07	8.15278e-07	4.09861	5.48459
DUSP23	2.02321	1.11918e-07	8.42881e-07	4.87347	6.3307
TOX2	-2.49179	1.1394e-07	8.56506e-07	5.73194	4.19023
ACVRL1	2.9891	1.15009e-07	8.6346e-07	4.37993	6.17996
HIST1H1A	-2.42328	1.17789e-07	8.82482e-07	6.32233	4.58848
TAS2R5	4.29784	1.21113e-07	9.06631e-07	3.34619	5.69661
SLC6A12	2.5914	1.23567e-07	9.24226e-07	4.55729	6.62413
THAP8	5.82329	1.27372e-07	9.50314e-07	2.82987	4.70051
FCRL3	2.90327	1.28132e-07	9.55193e-07	7.34937	10.2759
SLC28A3	3.83691	1.2933e-07	9.62126e-07	3.47307	5.3335
CCL20	-3.92911	1.34994e-07	1.00052e-06	5.95074	3.64419
HDAC9	2.04047	1.3544e-07	1.00342e-06	8.45651	10.3422
PDE4B	-2.67653	1.36881e-07	1.01284e-06	12.7098	9.9828
ABCD2	2.05804	1.3686e-07	1.01284e-06	7.58336	9.54001
CEACAM4	3.67734	1.3814e-07	1.02173e-06	4.01856	6.46203
LRRK2	2.08398	1.60518e-07	1.17514e-06	11.3681	13.4214
ZC3H12A	-2.21287	1.68644e-07	1.22962e-06	10.4869	8.23585
TAS2R13	3.6916	1.68725e-07	1.22971e-06	3.65698	5.74144
SNORD57	-2.30051	1.72191e-07	1.25395e-06	6.20052	4.55531
HDHD1	2.00349	1.75085e-07	1.27296e-06	5.84904	7.54497
LRRC18	2.18735	1.79192e-07	1.30109e-06	4.84761	6.472
TMEM169	2.73949	1.86267e-07	1.3488e-06	4.02674	5.73692
PDCL3P4	2.57049	1.8659e-07	1.35005e-06	5.31754	7.3445
C6orf57	2.77739	1.8799e-07	1.35854e-06	4.09726	5.77794
CARD9	2.16167	1.90375e-07	1.37467e-06	7.03134	8.96878
TBC1D8B	3.5296	2.16465e-07	1.54442e-06	3.83861	5.79634
CXCR2	3.35306	2.23872e-07	1.59347e-06	4.29372	6.69514
AOC3	-2.82316	2.26235e-07	1.60837e-06	6.32565	4.41535
G0S2	-5.93004	2.33399e-07	1.65276e-06	10.7981	4.79885
GPR97	-3.08298	2.60533e-07	1.83046e-06	7.61001	5.03789
GPR84	-3.17954	2.66498e-07	1.86871e-06	7.58403	4.92618
SIGLEC5	2.25427	2.68697e-07	1.88272e-06	6.16917	8.31267
SIGLEC11	2.77776	2.69276e-07	1.88598e-06	4.89024	6.74238
P2RY13	2.28836	2.77235e-07	1.93795e-06	7.15397	9.14612
RHOXF2	2.68077	2.92983e-07	2.04167e-06	4.29192	6.19345
PAIP2B	2.52324	3.02032e-07	2.09902e-06	4.47694	6.21107
TBC1D24	2.1172	3.32092e-07	2.29196e-06	5.90376	7.73013
ZNF404	4.37377	3.36885e-07	2.32058e-06	3.27979	5.55536
GOLPH3L	2.21826	3.48167e-07	2.39278e-06	6.13661	8.10973
PIP5KL1	-3.42116	3.53021e-07	2.42058e-06	5.63535	3.8012
ID3	-2.63173	3.55617e-07	2.43745e-06	6.87806	4.81036
ADAM22	2.03548	3.55799e-07	2.43776e-06	6.44561	8.26154
SIAH3	-4.72111	3.60739e-07	2.46958e-06	5.33702	3.16292
IQCJ-SCHIP1	-4.73785	3.64329e-07	2.49107e-06	5.14715	3.13501
CXCL2	-3.97922	3.64656e-07	2.49179e-06	8.76317	5.04533
TXLNB	2.40797	3.67904e-07	2.51303e-06	4.65282	6.34516
GPR162	2.55488	3.69067e-07	2.52001e-06	4.7098	6.52483
TMEM150B	2.65856	3.77988e-07	2.5731e-06	4.35095	6.00844
CASZ1	-2.0678	3.99149e-07	2.71098e-06	10.8147	8.76729
EMP1	-2.83531	4.04463e-07	2.74396e-06	7.79753	5.33487
SCN4B	-4.03755	4.14767e-07	2.81068e-06	7.00158	4.03937
GPR52	2.18111	4.40494e-07	2.97044e-06	5.96319	7.75897
ZNF221	2.38593	4.41818e-07	2.97825e-06	4.55644	6.18231
POU5F2	2.64458	4.5543e-07	3.0631e-06	4.96882	6.84293
SPIN2A	3.47008	4.58372e-07	3.08173e-06	4.31711	7.32779
CLDN1	-5.71888	4.59091e-07	3.08542e-06	4.30404	2.82987
CNDP1	-3.32998	4.87263e-07	3.26619e-06	6.02036	3.97772
HES1	-3.21279	5.04814e-07	3.3725e-06	5.90091	4.00216
TP53INP2	-2.56875	5.09889e-07	3.40387e-06	7.23121	4.94711
RASGEF1B	-2.27557	5.49024e-07	3.6448e-06	12.0726	9.49891
ARL6	2.86338	6.13558e-07	4.03738e-06	3.94714	5.58007
DDIT4	-2.26927	6.25831e-07	4.11212e-06	10.5881	8.27039
SIGLEC17P	2.04529	6.41862e-07	4.21282e-06	5.32225	6.91445
ZNF234	2.39662	6.44697e-07	4.22988e-06	6.59607	8.78413
CDCP1	-2.49232	6.68181e-07	4.37437e-06	7.03007	5.38735
CCDC19	-3.08418	6.75293e-07	4.41449e-06	8.93024	6.05995
TCAP	-3.95675	6.89524e-07	4.49204e-06	4.98846	3.32497
CAMK1G	-6.9384	7.21586e-07	4.67614e-06	5.01017	2.82987
AFMID	2.02155	7.27915e-07	4.71045e-06	5.10709	6.68033
OR52K2	4.40769	7.73843e-07	4.97538e-06	3.60964	6.1771
BTG3	-2.53649	7.84903e-07	5.03927e-06	9.36773	6.92793
CACNA1G	-5.70115	8.20906e-07	5.25538e-06	4.25342	2.82987
PPP1R16B	-2.69907	8.33099e-07	5.32394e-06	12.4599	9.74654
TRPA1	5.90945	8.39583e-07	5.36071e-06	3.04527	5.51894
THBS1	-2.9087	8.79468e-07	5.59239e-06	16.0169	13.0945
GCM1	-2.88386	8.88644e-07	5.64475e-06	5.11946	3.67672
MS4A7	2.0615	8.88591e-07	5.64475e-06	7.56373	9.49474
LINC00243	2.8536	9.10496e-07	5.77333e-06	5.44068	7.72768
HBEGF	-2.99288	9.1398e-07	5.79338e-06	11.7993	8.32396
SLCO4A1	-2.97687	9.18337e-07	5.81894e-06	6.47241	4.46418
ZMYM6NB	2.31036	9.27589e-07	5.86928e-06	4.02465	5.30169
C1R	-2.54507	9.46354e-07	5.97328e-06	6.41624	4.59411
C14orf64	2.41653	9.76124e-07	6.13959e-06	6.57796	8.74302
RGL1	2.25096	1.00528e-06	6.30528e-06	6.26095	8.02583
ADAMTS5	3.87621	1.13155e-06	7.05047e-06	3.43157	5.68047
NOSTRIN	-4.43644	1.1397e-06	7.09388e-06	5.65809	3.45366
FDX1L	2.07655	1.16995e-06	7.27205e-06	4.33843	5.62312
OLFML2B	4.5299	1.18626e-06	7.36324e-06	3.24214	5.16835
RNU4-2	-2.42073	1.23227e-06	7.63566e-06	6.5556	4.83765
EHHADH	3.64036	1.26554e-06	7.8202e-06	3.66025	5.35543
ASRGL1	2.23426	1.30759e-06	8.06619e-06	5.22332	6.9934
CLTCL1	2.58606	1.32185e-06	8.13738e-06	5.52407	7.58332
PDE4D	-2.31148	1.40186e-06	8.58867e-06	11.5701	9.14135
HSPA7	2.48322	1.40141e-06	8.58867e-06	7.0495	9.26076
GPX3	-2.40547	1.48066e-06	9.02215e-06	6.66523	4.89361
CXorf58	5.70717	1.4854e-06	9.0449e-06	2.99493	5.06509
ALDH1A2	-3.06602	1.53526e-06	9.3361e-06	5.43524	3.82979
PER1	-2.37919	1.5353e-06	9.3361e-06	12.2591	9.73238
BAMBI	-2.96404	1.53645e-06	9.3399e-06	6.8029	4.60063
FOSL1	-2.45139	1.57244e-06	9.54901e-06	6.53203	4.67792
DACT3	-5.2279	1.57876e-06	9.57768e-06	4.71308	3.04471
ACKR3	-2.45248	1.59904e-06	9.6876e-06	7.44424	5.61291
CXCR3	-2.19455	1.64272e-06	9.92921e-06	7.0879	5.27645
PZP	2.15308	1.68495e-06	1.01703e-05	7.81203	9.8723
GRIK1-AS2	2.97275	1.7636e-06	1.05881e-05	3.81168	5.2845
AMPH	3.00359	1.8154e-06	1.087e-05	4.53745	6.51152
CCL7	-5.53855	1.81916e-06	1.08853e-05	4.89647	3.05539
RP11-695J4.2	2.88064	1.87183e-06	1.11743e-05	3.65303	5.19306
TMEM79	2.39255	1.94054e-06	1.15653e-05	4.64176	6.30346
ARL11	2.26977	1.96238e-06	1.1676e-05	4.11968	5.40916
HIST3H2A	-2.10803	2.04138e-06	1.2126e-05	8.76545	6.75526
ATP8B1	2.17617	2.0848e-06	1.23594e-05	6.86325	8.94435
ELOVL4	-2.19933	2.0901e-06	1.23826e-05	7.4349	5.61797
GNAT1	-5.1891	2.16544e-06	1.2791e-05	5.01636	3.07976
NINJ2	2.16458	2.35274e-06	1.38381e-05	4.45818	5.89138
GNRHR	4.48883	2.35709e-06	1.38592e-05	3.2028	5.10543
MS4A4E	3.07045	2.39171e-06	1.40443e-05	4.47362	6.33594
SLC4A4	2.05724	2.50294e-06	1.46496e-05	6.37549	8.20717
CXCL3	-4.17833	2.53415e-06	1.48129e-05	7.06271	4.10643
HOXA5	-2.80181	2.63946e-06	1.53535e-05	5.85228	4.04283
LPL	4.18452	2.78424e-06	1.6107e-05	3.46051	5.52109
FFAR1	-4.71529	2.83095e-06	1.63508e-05	6.53812	3.71015
OR13D1	5.53765	2.84663e-06	1.64308e-05	3.14836	5.35421
OSCAR	2.03561	2.88207e-06	1.66247e-05	5.85889	7.50056
TSPYL2	-2.16437	2.95197e-06	1.7006e-05	14.7924	12.4202
AGPAT4-IT1	2.52656	3.12748e-06	1.7948e-05	4.05485	5.43883
NEU4	-5.5543	3.19166e-06	1.82697e-05	5.26052	3.08204
XIST	12.9921	3.29246e-06	1.88047e-05	4.0861	11.6771
DYSF	2.38795	3.40289e-06	1.94045e-05	10.1945	12.4471
EFCAB12	-2.40279	3.42293e-06	1.95002e-05	6.16198	4.4728
RGPD3	-2.05979	3.49172e-06	1.98794e-05	10.5297	8.56028
RASD2	-4.87793	3.52891e-06	2.00721e-05	4.88765	3.15795
HAS1	-3.53842	3.55004e-06	2.01859e-05	5.32096	3.66743
SERPINI1	3.01436	3.66517e-06	2.07747e-05	4.28199	6.26829
ST20	2.14703	3.73293e-06	2.11321e-05	5.08024	6.73371
MCHR1	6.05862	3.73733e-06	2.11436e-05	2.82987	4.69697
EMR3	3.05742	3.79446e-06	2.14398e-05	5.51691	8.0184
GSDMB	2.08239	4.05647e-06	2.28699e-05	7.56861	9.4514
HKDC1	2.61284	4.24716e-06	2.38551e-05	4.90891	6.83788
LOC643802	2.299	4.26321e-06	2.39302e-05	5.42531	7.32602
TMTC1	2.55037	4.41389e-06	2.46757e-05	5.56297	7.75534
CACTIN-AS1	-2.14166	4.54399e-06	2.53635e-05	5.28511	4.05187
PRKXP1	2.034	4.80663e-06	2.67298e-05	5.54842	7.16497
LOC101927579	3.06373	4.85273e-06	2.69528e-05	3.78486	5.37967
SCLY	4.17921	4.91991e-06	2.72921e-05	3.7006	6.3104
TOP1P1	4.55012	5.13666e-06	2.8433e-05	3.29813	5.18086
CC2D2A	2.13095	5.26035e-06	2.90728e-05	6.00744	7.69163
EREG	-3.76774	5.31522e-06	2.93309e-05	9.50582	6.01149
SMO	-3.85414	5.72546e-06	3.14787e-05	4.63525	3.22462
BAI3	4.73148	5.72412e-06	3.14787e-05	3.30525	5.50556
PXDC1	-2.45323	5.95242e-06	3.26564e-05	6.43378	4.66497
ZNF2	2.03358	6.1766e-06	3.38243e-05	4.82395	6.42263
CKMT2	2.98681	6.38905e-06	3.49026e-05	3.81168	5.30807
GSN-AS1	2.42517	6.45896e-06	3.52523e-05	3.99194	5.66477
MYCBPAP	3.33524	6.4651e-06	3.52751e-05	3.92997	5.85545
ZNF157	3.32344	6.65286e-06	3.62225e-05	3.4809	5.40812
MS4A14	2.25555	6.66469e-06	3.62649e-05	7.18326	9.3496
GTSF1	2.31033	6.68221e-06	3.63382e-05	4.44357	6.01504
LOC100505502	-2.45014	7.22831e-06	3.89656e-05	7.66272	5.46232
MS4A4A	2.68983	7.32938e-06	3.94512e-05	5.12807	7.22288
NR1H3	2.43483	7.43626e-06	3.99378e-05	4.57117	6.15331
CACNA2D3	2.58919	7.4962e-06	4.01925e-05	5.26265	7.54908
AMDHD1	2.01096	7.72903e-06	4.13056e-05	4.43805	5.78096
FAM106B	2.34185	7.74128e-06	4.13459e-05	5.16699	6.93977
CERKL	2.16368	7.95338e-06	4.24409e-05	5.38931	7.10795
CXCR4	-2.57372	8.3962e-06	4.45654e-05	15.5688	12.8267
KHK	2.00181	8.57443e-06	4.54577e-05	4.89843	6.41542
RGCC	-2.56541	8.82043e-06	4.66929e-05	10.9449	8.27042
RNF150	6.56663	9.15861e-06	4.8369e-05	2.97964	5.27937
MMP25	2.20001	9.31859e-06	4.91416e-05	4.53117	6.13918
PPM1H	2.42897	9.50756e-06	5.00206e-05	4.14858	5.70326
A2M-AS1	2.25128	1.07519e-05	5.59767e-05	4.80208	6.48199
MPP2	-2.97355	1.08788e-05	5.6555e-05	6.35745	4.32881
MORN1	2.02472	1.09537e-05	5.69118e-05	5.4446	7.05549
CXCR5	-2.15493	1.10326e-05	5.72553e-05	7.91542	6.02379
LYVE1	3.21281	1.14019e-05	5.90012e-05	3.63143	5.03757
PDGFRB	2.56591	1.15678e-05	5.98251e-05	5.35677	7.31555
TMEM182	3.42964	1.17932e-05	6.0816e-05	3.3429	5.03736
RNASE3	3.58122	1.19135e-05	6.1383e-05	3.79731	5.5302
POC1A	2.20162	1.24001e-05	6.37621e-05	4.22074	5.53874
FNDC7	-2.7926	1.24539e-05	6.40025e-05	6.46105	4.41719
FCGR2C	2.14722	1.25376e-05	6.43774e-05	10.396	12.3099
NR4A3	-3.48327	1.26007e-05	6.4664e-05	9.98874	6.12541
PRH2	3.51963	1.2638e-05	6.48187e-05	3.41624	5.56679
NAMPT	-2.18208	1.26568e-05	6.48962e-05	16.1038	13.6008
FAT2	2.25882	1.26736e-05	6.49641e-05	4.53347	6.01493
HSPA2	-2.35342	1.26777e-05	6.49665e-05	8.3773	6.03154
TNFSF9	-2.97887	1.32406e-05	6.75807e-05	5.60489	3.89097
C9orf69	2.48198	1.33109e-05	6.79202e-05	4.00511	5.30189
ZSCAN20	2.90501	1.33524e-05	6.80936e-05	3.81506	5.69693
ADAM21	3.6725	1.33835e-05	6.82131e-05	3.62362	5.39613
LOC100272216	2.12412	1.34616e-05	6.84944e-05	6.73966	8.91391
SLAMF8	2.92847	1.39497e-05	7.08575e-05	4.03489	5.70332
RNA5-8S5	-2.21142	1.42366e-05	7.2213e-05	11.2945	8.82861
CD163L1	3.73696	1.46574e-05	7.41796e-05	4.00846	5.78234
SLC38A3	-5.93205	1.49094e-05	7.53489e-05	4.43295	2.82987
TNFRSF12A	-3.03389	1.52067e-05	7.67214e-05	4.71569	3.42452
OR52K1	4.92103	1.52952e-05	7.71464e-05	3.20166	5.28003
TMEM52B	-3.46233	1.54805e-05	7.80373e-05	4.74803	3.37745
NUDT7	2.47198	1.58556e-05	7.9682e-05	3.95658	5.34944
DNAH6	2.43857	1.59248e-05	8.00074e-05	5.20911	7.25123
ALOX15B	3.68683	1.60291e-05	8.04864e-05	3.96565	5.89082
FUT7	2.0404	1.62991e-05	8.17276e-05	6.63852	8.4606
LOC102724594	-2.18019	1.65358e-05	8.28219e-05	10.6601	8.352
FAM86B2	2.02518	1.66854e-05	8.34551e-05	4.71308	6.12204
C12orf79	-3.35285	1.68658e-05	8.42164e-05	8.24745	5.28489
GPR133	2.40317	1.7291e-05	8.6061e-05	5.61475	7.58847
LOC101930171	7.00477	1.76096e-05	8.76134e-05	2.82987	4.92909
RHBDL3	-6.81095	1.78788e-05	8.88545e-05	4.40749	2.82987
C6orf223	-4.8349	1.85939e-05	9.22042e-05	4.43596	3.04161
SYNGR3	-2.42073	1.86074e-05	9.22454e-05	5.07915	3.88437
LPAL2	2.26164	1.90123e-05	9.40709e-05	6.85799	8.92609
TSKS	3.81408	1.94569e-05	9.60857e-05	3.25971	4.90084
DZIP1L	3.05701	1.99168e-05	9.81675e-05	3.71776	5.09086
KL	3.03993	2.00284e-05	9.86906e-05	3.54692	5.00234
STYK1	2.38865	2.0683e-05	0.000101749	4.56428	6.05636
ZFP2	3.92348	2.0729e-05	0.000101919	3.19503	4.78313
LOC644086	3.02731	2.11174e-05	0.000103659	4.14974	5.95534
NSUN7	-2.71575	2.22115e-05	0.000108524	6.26704	4.36191
WNT11	-3.47859	2.33688e-05	0.000113715	4.99344	3.4557
LOC102723996	-3.24463	2.33932e-05	0.000113802	7.42961	4.5399
PTGFRN	2.16249	2.41679e-05	0.000117276	4.53277	5.81402
FAM90A25P	2.79453	2.41726e-05	0.000117276	4.5452	6.44797
EXTL2	3.43492	2.46045e-05	0.000119178	3.5188	5.22498
TSPYL6	2.82698	2.46675e-05	0.000119451	3.70876	5.06345
S100Z	2.59728	2.47544e-05	0.000119775	4.60143	6.34627
PLAUR	-2.09239	2.59816e-05	0.000125274	12.2556	10.0476
SP8	-16.2475	2.70265e-05	0.000129894	2.98329	2.82987
PTGR2	2.10415	2.7238e-05	0.00013084	5.04664	6.66185
CD1C	2.68998	2.81585e-05	0.000134901	6.14072	8.53031
DCST1	-2.35903	2.97735e-05	0.000141918	5.64936	4.18191
SENP8	4.99493	3.08053e-05	0.000146215	2.97964	4.6545
ARHGAP40	-16.1244	3.10834e-05	0.000147418	2.97964	2.82987
FCGR1C	2.68653	3.16324e-05	0.000149745	6.42522	9.10249
KDM4E	5.03718	3.20019e-05	0.000151295	2.98329	4.60439
CDRT15P1	2.84849	3.25371e-05	0.000153542	3.67587	5.21275
A2M	2.03788	3.30588e-05	0.000155758	8.96077	11.0029
SPIN3	2.28703	3.33704e-05	0.000157158	4.30136	5.7667
CCR8	3.22268	3.36239e-05	0.000158172	3.77256	5.35755
CEACAM1	2.44297	3.36827e-05	0.000158407	4.8643	6.73796
TSHR	2.31238	3.40781e-05	0.000160074	4.71615	6.3354
BTBD8	2.11301	3.67285e-05	0.000171428	4.44705	5.80239
FAM166A	-2.37528	3.71258e-05	0.000173119	6.36933	4.61421
MIR421	2.71433	3.74408e-05	0.00017439	4.22973	5.82246
ZNF233	2.333	3.75818e-05	0.000174775	4.18524	5.69379
PANX2	-2.63165	3.79365e-05	0.000175939	5.98775	4.3742
METTL7B	6.38609	3.8835e-05	0.000179672	2.82987	4.36142
COL2A1	-2.27953	3.97051e-05	0.000183508	5.09263	3.92679
ZCWPW2	3.29083	4.02474e-05	0.00018568	3.45434	4.97672
ROR1	-2.87174	4.07598e-05	0.000187899	6.44109	4.33467
HTRA1	2.74228	4.24204e-05	0.000194904	5.04549	7.12889
ABTB2	-2.16004	4.27666e-05	0.000196444	7.24703	5.39963
TACR1	2.50961	4.5791e-05	0.000209479	3.70098	5.06735
HORMAD1	2.41926	4.80627e-05	0.000219368	5.68749	7.54187
FAM172BP	-2.60207	4.85647e-05	0.000221419	5.5442	3.91661
TMOD1	3.42857	4.85862e-05	0.000221419	4.26168	5.94896
PRSS1	3.26639	4.88801e-05	0.000222646	3.65302	5.56809
CD1A	4.65438	5.02331e-05	0.000227999	3.3011	5.21323
C10orf105	2.15956	5.07131e-05	0.000229887	4.03734	5.19222
SDS	-2.47631	5.0997e-05	0.000231057	5.72808	4.21381
C11orf96	-3.79983	5.35293e-05	0.000241676	5.65844	3.57539
ISM1	2.31757	5.40173e-05	0.000243504	4.58797	6.14832
FAM186A	3.97839	5.41439e-05	0.000243899	3.35869	5.04645
SNORD116-15	-2.11491	5.4774e-05	0.000246428	8.68085	6.54126
MRM1	2.77608	5.60843e-05	0.000252007	3.47065	4.7053
GPER1	3.27914	5.62818e-05	0.000252705	3.98413	5.65026
IL23R	3.18113	5.80455e-05	0.00025965	4.01742	6.05569
ANKRD55	2.63671	5.81184e-05	0.000259911	5.10545	7.0257
CD200	-2.07404	5.99047e-05	0.000267035	7.72624	5.85705
DDR2	-2.00966	6.10251e-05	0.000271692	7.13647	5.39889
AVPI1	-2.08688	6.11589e-05	0.000272153	6.13184	4.6035
LRRN2	2.52896	6.23784e-05	0.000276756	4.23308	5.86735
SPDYA	-2.11837	6.37552e-05	0.000282446	5.84921	4.44853
MARC1	2.20253	6.53972e-05	0.000289007	6.68647	8.77788
PPIAL4B	3.86364	6.62803e-05	0.000292549	3.50632	5.54788
SNAI1	-3.02258	6.66958e-05	0.000294166	7.31942	4.6731
SPTBN4	-2.08854	6.74846e-05	0.000297353	5.27396	4.06215
FMR1-AS1	-2.01089	6.89372e-05	0.00030353	5.53171	4.33584
LOC100129083	2.07767	7.09403e-05	0.000311738	4.40698	5.83033
SNORD28	-2.00168	7.26855e-05	0.000318549	6.8614	5.23764
BPHL	2.05225	7.29716e-05	0.000319492	4.04612	5.18001
MIR601	4.60451	7.29717e-05	0.000319492	3.04527	4.74905
GADD45B	-2.04481	7.32554e-05	0.000320499	10.6192	8.45724
CTTNBP2	3.17583	7.532e-05	0.000328731	3.92767	5.87388
GPR141	2.77532	7.59988e-05	0.000331532	4.46151	6.53577
CDON	2.0492	7.65667e-05	0.000333847	5.10329	6.676
PLAT	-2.67663	7.72057e-05	0.00033647	4.74652	3.60025
CLEC6A	2.77854	7.79375e-05	0.000339167	4.18666	6.11275
OR2A1	2.22752	7.86223e-05	0.000341979	6.6558	8.57393
C20orf196	2.3155	7.92984e-05	0.000344586	4.05919	5.42006
EP400NL	2.78207	7.9845e-05	0.000346542	3.49626	4.70416
APBB2	-3.0064	8.14322e-05	0.000352069	6.98516	4.85917
DCSTAMP	-2.47528	8.50971e-05	0.000366325	4.66234	3.68939
FAM86C2P	2.23173	8.74747e-05	0.00037584	3.91363	5.38429
DEPTOR	2.30317	8.75203e-05	0.000375946	4.28614	5.66922
ZNF165	-2.04095	8.94339e-05	0.000383066	6.47203	4.93019
ITGA3	2.13909	9.06033e-05	0.000387704	5.17522	6.84374
GPR64	2.18952	9.24632e-05	0.000395381	4.07893	5.32555
MYO3B	2.30146	9.43426e-05	0.000403129	5.07783	6.70871
NUDT18	2.12635	9.65356e-05	0.000411325	4.06528	5.202
GJB2	-4.68458	9.88971e-05	0.000420091	4.3991	3.00011
LYPD3	-2.77663	0.000102847	0.000435529	6.38271	4.35094
PLCD3	-2.16855	0.000103541	0.000438262	7.2708	5.54029
GZMA	2.16267	0.000103943	0.000439859	8.36048	10.5797
ZNF177	6.46336	0.000104789	0.00044302	2.82987	4.77998
PLEKHD1	-2.42347	0.000105964	0.000447503	5.53299	4.11631
CYP1B1	2.12311	0.000108819	0.000458762	8.01446	10.3746
IQGAP3	-2.70911	0.000110696	0.000465471	5.74172	4.17745
SPA17	2.71566	0.00011316	0.000474942	3.80984	5.14702
RPH3AL	2.36218	0.000114334	0.000479649	3.87208	5.02693
SHROOM1	2.32361	0.000115667	0.000484675	4.67539	6.19027
FAM46B	-4.61935	0.000116935	0.000489414	4.05736	2.94238
LOC102724923	2.49326	0.000117394	0.000491108	4.31425	5.83796
RXFP2	3.72105	0.00011821	0.000493937	4.11081	6.15091
ERMN	-2.10473	0.000119599	0.00049905	9.99973	7.89359
C7orf61	-2.1833	0.000119845	0.000499963	5.50078	4.24292
GPRC5A	-3.08896	0.00012234	0.000509779	4.57859	3.35848
LOC101927789	-2.51327	0.00012566	0.000522886	5.05379	3.77028
MCOLN3	2.12271	0.000129553	0.000536842	4.57302	5.93698
RNU2-2P	-2.62233	0.000134965	0.000557342	7.22312	5.02341
CD83	-2.30116	0.000136468	0.000563157	11.6091	8.86608
RHBDL1	-2.05758	0.000139543	0.000574789	5.35569	4.15709
TAS2R3	3.41736	0.000139997	0.000576529	3.50605	5.16636
C11orf65	2.1784	0.000141333	0.000581631	4.10369	5.39837
DNAH7	2.61583	0.000141489	0.000582006	4.10451	5.65156
FAM171A1	2.67692	0.000142426	0.000585189	4.17906	5.84306
FCGR1B	2.06127	0.000143169	0.000587702	7.72428	9.31525
VSIG4	2.79845	0.000144382	0.000592142	6.24496	8.00487
C21orf49	3.00171	0.000148239	0.000606297	3.59357	5.17771
KCNH2	3.70652	0.00015222	0.000620598	3.64462	5.39917
FZD4	2.15172	0.000156362	0.000635608	4.7878	6.30365
TNFAIP3	-2.35614	0.000160063	0.000649149	15.4924	12.869
SNORD22	-2.01537	0.000160507	0.000650691	10.2879	8.18081
LOC101927730	-2.51049	0.000162529	0.000658144	5.02703	3.80833
ZNF239	2.29235	0.00016515	0.000667863	4.2166	5.67674
ENPP5	2.61086	0.000165736	0.000669924	4.43037	6.27473
IL8	-3.95987	0.000168076	0.000678464	14.0011	8.7903
NXPH4	-2.94934	0.000181755	0.000729255	4.62079	3.42873
SLC2A14	-4.72037	0.000189644	0.00075904	7.30032	4.69602
A4GALT	-5.32239	0.000193078	0.00077151	4.03086	3.01992
VN1R5	-3.10407	0.000198469	0.000790835	4.72405	3.51137
CDC42EP2	2.19353	0.000198655	0.00079105	3.96601	5.01489
FAM133A	14.3303	0.000202782	0.000806054	2.82987	3.0703
KLHL32	2.5126	0.000207139	0.000821372	3.96325	5.42262
CKB	-2.84829	0.000211797	0.000837624	6.80789	4.66967
KIRREL2	-2.67131	0.000229682	0.000900814	4.76905	3.563
SERPINE1	-2.51319	0.000229922	0.000901362	9.08327	6.65331
C1QB	3.07116	0.000232738	0.000911205	5.35066	7.05545
SLC9A7P1	2.00636	0.000247015	0.00096272	6.11676	7.90915
SPOCK2	-2.0232	0.000247701	0.000964949	13.5452	11.4231
SPOCK1	2.18767	0.000252851	0.000983304	3.73858	4.9771
JPH4	2.05917	0.00025484	0.000989537	3.82377	4.75503
LOC101927911	4.64684	0.000264492	0.00102172	3.04527	4.72878
LOC102723475	4.62663	0.000269378	0.00103924	2.82987	4.08446
PTPRB	2.72743	0.000269552	0.00103969	4.48299	6.42235
USP17L8	6.0823	0.00027463	0.00105791	2.97964	4.80747
INSL6	4.26329	0.000282089	0.00108479	2.98329	4.21576
OR2L5	4.08352	0.000284212	0.00109197	3.40111	5.60853
C6orf229	2.58485	0.000285166	0.00109474	4.49617	6.2899
EDNRB	-2.73098	0.000292257	0.00111957	5.68672	4.23032
MIR554	-3.05574	0.000306465	0.00116752	4.48774	3.41828
KCNH4	-2.56831	0.000316616	0.00120084	5.14981	3.86627
DTNA	2.85708	0.00032093	0.00121541	4.60205	6.52437
SLC44A5	3.48706	0.000321215	0.00121623	3.78989	5.55171
LOC100652824	-5.25359	0.000323379	0.0012239	4.11968	2.82987
ETNK2	-2.49411	0.000333473	0.00125839	6.23355	4.3243
SYCP2L	-2.36869	0.000333367	0.00125839	5.92764	4.37452
OR2L2	3.30223	0.000338798	0.00127607	3.59664	5.31239
DPF3	2.07177	0.000342449	0.00128793	4.30674	5.56558
CXCR1	2.21183	0.000343807	0.00129263	4.29818	5.668
ENTPD3	2.82153	0.000344269	0.00129382	3.51276	4.849
HSD3BP4	2.99777	0.000348916	0.00130924	3.45855	4.79509
RNU2-1	-2.33128	0.00035099	0.00131592	8.20125	5.79768
IGSF9B	2.19604	0.000355743	0.00133068	6.00844	7.88326
SLC35E4	-2.32247	0.000361668	0.00134947	4.83995	3.73687
MAP7D2	4.39412	0.000365306	0.00136163	3.66346	5.85338
FMN1	2.36802	0.000367469	0.00136799	7.74192	9.5971
PRSS2	2.48299	0.000368576	0.00137126	4.25603	5.95106
SNORD6	-3.24578	0.000375097	0.00139292	4.86634	3.36264
CXCL1	-2.32437	0.000381518	0.00141413	6.15392	4.51939
NAPSB	2.0526	0.000384239	0.00142304	7.26716	8.93571
C9orf173	-3.69097	0.000386048	0.00142856	5.3238	3.51492
CLDN24	3.35637	0.000387164	0.0014324	3.37117	4.67684
FAM167A	-3.21543	0.000408891	0.00150546	5.44394	3.67992
ANXA9	2.31891	0.000409057	0.00150564	4.075	5.35606
TUBB3	-2.61446	0.000410298	0.00150989	5.30395	3.813
MED4-AS1	-2.12524	0.000417159	0.00153294	5.90457	4.51943
RAB40AL	3.03057	0.0004186	0.00153792	3.58887	5.14672
LOC102724364	2.17875	0.000422114	0.00154957	4.06414	5.30867
HP	2.67968	0.000423326	0.00155338	7.11211	8.95526
SRCRB4D	4.64189	0.000434223	0.00158882	2.82987	4.10828
ARMC9	2.03669	0.000444088	0.00161864	4.2034	5.33289
WNT5B	3.37873	0.000446345	0.00162654	3.36752	4.6531
FLJ20712	4.24711	0.000452096	0.00164516	2.98329	4.20723
IL10	-2.3089	0.000470086	0.00170303	7.54158	5.70145
EPB41L4B	-4.83624	0.000477483	0.00172669	3.91255	2.82987
MARC2	2.8135	0.000479537	0.00173377	3.3978	4.83842
ZNF501	2.00003	0.000483234	0.00174551	4.20834	5.33498
C1QC	2.89774	0.000488606	0.00176195	4.52824	5.79584
TINAGL1	-4.36469	0.000490865	0.00176938	4.46915	3.13921
ACTN2	-4.13993	0.000493746	0.00177834	3.58019	2.82987
KCNK13	3.46896	0.000501176	0.00180112	3.36421	4.5849
ZNF630	2.53078	0.000504684	0.001813	4.71892	6.5478
MEF2BNB	2.57327	0.000519288	0.00186137	3.63589	5.00201
ITGB2-AS1	2.31798	0.000521366	0.00186807	3.70761	4.7727
FAM86KP	2.5374	0.000522027	0.00187007	3.46967	4.66912
LOC441081	2.74932	0.000529433	0.00189471	8.66949	11.189
TREML3P	-3.84327	0.000531773	0.00190156	4.46233	3.17759
CYP17A1	3.02286	0.000536689	0.00191723	3.57961	4.83317
FCER1A	2.24753	0.000544615	0.00194053	6.40104	8.32374
CILP2	-2.89911	0.000554203	0.00197156	4.28549	3.39473
FGF9	-2.28198	0.000561328	0.00199217	6.09697	4.465
DSC1	2.07391	0.000576138	0.00203966	5.67389	7.22564
CCDC34	2.09574	0.000576427	0.00203966	4.53752	6.00617
THBS4	2.11721	0.000581859	0.0020565	4.466	5.90421
WNT5A	-4.33214	0.000582517	0.00205761	3.56614	2.82987
PLEKHG7	2.76036	0.000586394	0.00206967	3.56903	4.87856
OR2L3	3.35647	0.000601426	0.00211732	3.53253	5.53705
LOC101927055	4.58295	0.000602851	0.00212192	2.82987	4.05039
LIM2	2.59536	0.000608408	0.00214022	3.91365	5.62583
MAOB	2.16535	0.000613482	0.00215553	4.03769	5.16424
CHAD	2.75726	0.000615437	0.00216167	3.69004	4.91176
PMP22	-2.56649	0.000617159	0.00216611	6.93021	5.24475
FTCDNL1	2.29363	0.000617217	0.00216611	3.84606	4.84737
TMEM75	2.29779	0.000621122	0.00217854	3.86257	4.95423
GPR63	2.86731	0.000625003	0.00219044	3.53479	4.94931
DHCR24	2.12416	0.000631929	0.00221212	5.55027	7.28961
DNAH17-AS1	-2.7993	0.000632346	0.00221315	4.51542	3.34429
BACE1-AS	4.21888	0.000645353	0.00225165	2.97964	4.2289
SLC5A9	4.24358	0.000658784	0.00229413	3.13603	4.55676
YPEL4	-2.36558	0.000663811	0.00231021	6.45771	4.45446
NINL	2.18619	0.00066923	0.00232772	4.7472	6.21605
TCTE1	-2.94116	0.0006737	0.00234145	6.04726	3.97987
DNAI2	2.56603	0.000676998	0.00235018	4.01353	5.32049
WISP1	-3.68272	0.000686351	0.00237897	4.24757	3.17643
LOC728763	2.91796	0.000691789	0.00239643	3.69016	4.919
KGFLP2	2.42834	0.000711823	0.00245993	3.85709	5.41223
FBXL16	2.83355	0.000712039	0.00245993	3.57028	4.9593
IL1B	-2.72354	0.000725075	0.00250186	12.6702	9.31132
KIF26B	2.7219	0.000732197	0.00252375	3.64018	4.78436
PPAP2B	-2.37192	0.000733172	0.00252565	5.3455	4.19991
NUDT12	2.99835	0.000734155	0.00252758	3.52979	5.09708
TRNN	-4.09438	0.000737464	0.002538	4.51028	3.39302
DGKK	2.51774	0.000740365	0.00254506	4.75311	6.49809
TAS2R10	4.00251	0.000743429	0.0025551	3.20527	4.78896
GPC1	2.56611	0.000748846	0.00257224	3.49701	4.67928
FLT3	2.25778	0.000750488	0.00257739	7.50582	9.35306
SEMA3B	-2.15706	0.000751831	0.00258101	4.9159	3.84235
NKX2-1	13.0099	0.000760153	0.00260609	2.82987	2.94238
RFPL2	5.07916	0.000765686	0.00262256	2.82987	4.26318
NT5C1A	-4.12426	0.00076695	0.00262639	4.3965	3.17263
FREM3	2.81367	0.000780893	0.00266961	3.51816	4.79897
LINC-PINT	-2.11171	0.000800573	0.00273007	4.78879	3.78644
LGI4	-2.4883	0.000803019	0.00273581	4.71683	3.57913
FLJ23867	-2.06598	0.000812592	0.00276423	5.53235	4.25319
C10orf10	3.56447	0.000813662	0.00276735	3.19503	4.54682
POF1B	3.25982	0.000820838	0.00278805	4.0985	5.7404
C1orf220	2.7879	0.000867108	0.00292694	3.7511	5.03647
TDRD9	2.19916	0.000882406	0.00297522	6.72866	8.73483
LOC101928524	2.19613	0.000886393	0.00298698	3.69395	4.68991
CD1E	3.8192	0.000911579	0.00306036	3.23917	4.88982
PIGZ	2.10586	0.000922563	0.00309319	3.78727	4.69906
TRNR	-4.38927	0.000923688	0.00309638	4.72771	3.35735
TMX2-CTNND1	-2.68763	0.000942034	0.00315141	9.073	6.0145
TMPRSS11D	4.56506	0.000958595	0.00319966	2.82987	4.01644
MSX2P1	2.85904	0.000970648	0.00323507	3.5906	5.05062
TRNK	-4.11863	0.000983008	0.00327384	4.92634	3.57489
AMZ1	-2.06375	0.000989251	0.0032928	4.70356	3.73463
LRP11	2.15932	0.001011	0.00335957	4.10617	5.43177
CYP4F22	2.52193	0.00101357	0.00336563	4.37745	6.47948
OR1D5	2.71155	0.00101981	0.00338511	3.77974	5.02018
DPRXP4	2.00325	0.0010303	0.00341865	4.31797	5.42561
SMCO4	3.21398	0.00103698	0.00343791	3.20527	4.33489
BRICD5	2.04062	0.00104992	0.00347668	3.63175	4.70094
LCN10	4.05484	0.00105304	0.00348574	3.15133	4.46482
LOC100996761	-2.14447	0.00105815	0.00349943	5.96147	4.67117
MRC1	2.16965	0.00107209	0.0035403	8.24685	9.87128
CACNA1C-AS1	4.17073	0.00107924	0.00356194	3.0402	4.56247
ACHE	-4.73572	0.00108266	0.00357192	4.15848	2.9291
SLC26A8	2.8189	0.00111606	0.00366992	3.81529	5.32472
CA8	3.442	0.00114157	0.0037422	3.41524	4.74995
GPA33	2.03401	0.00117918	0.00385073	5.45841	7.03568
ANKRD9	-2.02877	0.00119949	0.00390995	4.70749	3.81677
GH1	-3.29575	0.00120052	0.00391187	6.28265	4.07758
TP63	2.67717	0.0012091	0.00393627	3.62928	4.99684
LOC101927705	2.15597	0.00121363	0.00394816	4.96422	6.23792
FST	-3.38021	0.00126285	0.0040949	4.64418	3.18186
RAB40B	2.15376	0.00131096	0.0042356	4.12365	5.30307
TRNI	-4.1693	0.00131948	0.0042572	4.74625	3.37621
PGA5	2.62472	0.00133184	0.00428916	3.87955	5.48431
SLC13A4	2.55749	0.00135681	0.00435864	3.77032	5.02861
CRLF2	-2.14725	0.00138455	0.00443506	6.44984	4.94628
COL5A3	2.51982	0.0014492	0.00462152	4.34452	6.5461
MCAM	-3.03194	0.001461	0.00465669	6.81014	4.60724
SLC25A47	-2.68535	0.00146284	0.00466171	4.67974	3.5107
ILDR2	-2.2167	0.0015107	0.00479637	5.07404	3.86069
MAP2K4P1	3.17356	0.00151266	0.00479917	3.35002	4.53532
RFPL3S	-2.02294	0.00152618	0.00483951	5.73125	4.24278
IL1RL2	-2.22006	0.00160081	0.00504409	4.71027	3.65596
RPL34-AS1	3.29937	0.00160344	0.0050506	3.2028	4.39713
DAB1	4.71312	0.00160492	0.00505436	2.98626	4.22391
MATN1	-2.11653	0.00165147	0.00518822	5.61146	4.2706
FERMT2	-2.126	0.00165303	0.00519131	5.27838	4.05022
LY6G6C	-3.76348	0.00166775	0.00523114	4.14345	3.11752
NKX3-1	-2.49562	0.00168193	0.00526642	4.76794	3.60868
KRT74	3.77865	0.00168898	0.00528665	3.09675	4.63543
SLAMF9	-3.90493	0.00169438	0.0053017	4.02154	3.03998
C21orf67	3.01571	0.00171115	0.00534764	3.39994	4.56175
ID1	-2.32676	0.00171199	0.00534841	5.91172	4.26024
NMNAT3	2.00156	0.00171538	0.00535712	4.00229	5.03074
AKAP3	2.88948	0.00179926	0.0055967	3.52094	4.58219
UTS2	4.07146	0.00181785	0.00564962	3.54508	5.23227
LINC00654	3.52345	0.00184536	0.0057262	3.2028	4.49919
VWCE	-2.30095	0.00187099	0.00579972	5.31683	3.8968
IQCA1	2.27828	0.00188153	0.00582635	3.95104	5.09907
SYBU	4.16108	0.00190001	0.00587446	3.1447	4.552
GDAP1L1	3.38645	0.00190188	0.00587719	3.43429	4.86957
ATP6V1E2	3.65933	0.00190446	0.00588416	3.13306	4.31593
REREP3	2.4209	0.00192287	0.00593696	5.53963	7.53858
FFAR4	2.6942	0.00193618	0.00597496	3.46621	4.58551
ANKRD34B	4.33566	0.00195058	0.00601351	3.06136	4.59725
OVCH1	4.28849	0.00197093	0.00607072	3.09182	4.68498
LOC102723692	2.56208	0.00203805	0.00625065	3.55453	4.82691
TAS2R4	2.88833	0.00204386	0.00626525	3.39027	4.83767
CCDC67	4.2625	0.0020897	0.00638504	2.98329	4.22855
MUC16	2.16078	0.00221603	0.00672753	5.46141	7.23492
KCNH1	3.87589	0.00222174	0.00674144	2.98329	4.091
LOC285095	4.45737	0.00236139	0.00712546	2.97964	4.27803
C9orf139	2.78023	0.00237019	0.00714599	3.62184	4.83836
LOC254896	3.99567	0.00240227	0.0072318	3.19503	4.3539
SLC1A3	2.18612	0.00249988	0.00749798	4.75016	6.22211
LOC100507217	-2.54112	0.00252751	0.00757072	4.81795	3.50499
NRARP	-3.92076	0.00262421	0.00782902	4.06202	3.04161
COL12A1	-3.19143	0.00264448	0.00788163	4.18386	3.19773
MSLN	-4.37642	0.00264626	0.00788482	4.63048	3.60144
C1QTNF7	2.77241	0.00265441	0.00790598	3.72286	4.91055
CCDC147	2.00189	0.00266096	0.00792285	3.75214	4.55528
GUCY2C	2.8343	0.0026657	0.00793303	3.86394	5.1697
SEMA3D	3.55696	0.00277982	0.00823712	3.19363	4.34717
LRRC63	2.80678	0.00281192	0.00832126	3.39556	4.52498
SIGLEC16	2.8841	0.0028465	0.00841111	3.88181	5.25755
LOC102723891	3.30292	0.00286989	0.00846908	3.55122	4.76848
SEMA3A	2.23722	0.00287254	0.00847273	3.73928	5.04822
GSDMA	2.63811	0.00287839	0.00848857	3.90102	5.0025
TRNG	-3.82143	0.00291091	0.00857008	4.84486	3.49899
NYNRIN	2.19746	0.00291091	0.00857008	4.09277	5.07854
FBXO15	2.54714	0.002949	0.00867403	3.42809	4.39523
TBC1D3P1-DHX40P1	-2.50203	0.00295734	0.00869711	5.82241	4.0756
SIGLEC6	2.16717	0.0029772	0.00874548	4.2536	5.69233
LOC101928247	2.33606	0.00308363	0.00902354	3.63175	4.82938
MYO5B	2.09425	0.0032035	0.0093354	5.13562	6.88522
SCN5A	2.81152	0.00322359	0.00938474	3.47215	4.61504
STX19	2.6399	0.00328085	0.00952833	3.52166	4.68159
C10orf25	3.55432	0.00337484	0.00977284	3.13969	4.23421
CKMT1A	-3.63849	0.00351471	0.0101419	4.49104	3.21942
OR56B4	4.72622	0.0035769	0.0102998	2.82987	4.08597
USP17L2	2.26497	0.00358553	0.0103213	5.06076	7.12115
WDR63	2.6141	0.00379633	0.0108602	4.12243	6.00554
BFSP2	3.18261	0.00383338	0.0109575	3.19914	4.35165
GFRA2	2.45112	0.00384382	0.0109856	3.81809	5.1685
MGC70870	3.77817	0.0038762	0.0110708	3.13969	4.34864
PLA2G4C	2.03202	0.00388448	0.0110877	4.74516	6.06566
TMEM99	3.08406	0.00389347	0.0111098	3.21033	4.25246
PNCK	-3.6304	0.00390611	0.0111441	3.92862	3.04161
CELA2A	-2.18993	0.00392537	0.0111901	4.41474	3.58063
FAM132A	-2.2571	0.00392711	0.0111933	4.72066	3.66211
LOC101060351	-5.81334	0.00396627	0.0112906	5.21316	3.26215
MAFA	-2.98558	0.00399948	0.0113779	4.34032	3.28245
KCNJ1	2.09885	0.00402788	0.0114426	4.93692	6.46968
CDS1	-2.07723	0.00403231	0.0114532	5.84687	4.51725
TCEB3B	4.08013	0.00409088	0.0116048	2.82987	3.75668
SLC7A8	2.00068	0.0041915	0.011864	3.73271	4.82028
MRAP	2.8019	0.00420735	0.0119014	3.23917	4.37272
MPZL2	2.20904	0.00422167	0.0119362	4.51109	5.9754
CXCL17	4.14715	0.00426837	0.0120531	2.82987	3.91557
CTRC	-2.04602	0.00432119	0.0121927	5.74239	4.36785
GOLGA6A	2.31346	0.00442794	0.0124547	3.91638	5.33604
HOXB6	-2.68073	0.00448103	0.0125942	4.07705	3.21516
ITIH1	2.35297	0.00462388	0.0129349	3.68755	4.63183
BMX	4.16047	0.0046356	0.0129637	2.82987	3.87984
MYOM2	2.84233	0.00473687	0.0132221	5.46456	9.18901
ZNF704	-2.63674	0.00474727	0.013245	4.94177	3.48325
ABHD12B	2.15552	0.00475212	0.0132544	3.84994	4.78566
LINC00684	4.5309	0.00477695	0.0133195	2.82987	3.95291
ALPL	-2.15806	0.00482605	0.0134376	4.53001	3.71577
CHRDL1	-3.61743	0.00482989	0.0134441	3.48289	2.82987
PNMAL2	3.32465	0.00491541	0.0136504	3.1447	4.14519
OR2A9P	2.14362	0.00495097	0.0137322	5.31191	7.10751
PGA3	3.48981	0.00508059	0.0140613	4.08756	6.78226
GALNT5	-2.25519	0.0050954	0.014098	5.01019	3.75468
FGF18	-3.55252	0.00511016	0.0141323	3.926	3.03793
PEX11A	2.21865	0.0051097	0.0141323	3.54383	4.55468
OR52W1	4.6507	0.00511428	0.0141415	2.82987	3.94126
DLEU7	3.2193	0.0051218	0.0141579	3.20166	4.23274
USP17L7	2.44354	0.00523384	0.0144254	4.81712	7.17033
VANGL2	-4.2355	0.00524722	0.0144578	3.99172	3.08352
FAM222A	-2.14069	0.00535128	0.0147062	4.96177	3.91439
TRND	-3.95159	0.005373	0.0147591	4.57337	3.40456
HEY1	-2.59088	0.0053804	0.0147732	4.16178	3.34857
NBPF6	2.2062	0.0053862	0.0147863	4.12979	5.18074
LOC649352	6.027	0.0053952	0.0148042	2.82987	4.4704
C12orf40	3.18948	0.00544629	0.0149307	3.19503	4.33927
ZMAT4	3.64865	0.00556737	0.0152231	3.21444	4.5102
MAB21L1	2.84687	0.00561583	0.0153463	3.36673	4.25792
OR7D2	-2.34071	0.00566544	0.0154719	4.70201	3.89894
C19orf84	2.69572	0.00575591	0.0156861	3.44473	4.90672
FOXA1	-4.27762	0.00580143	0.015791	4.09067	2.95779
LOC101929133	-2.03103	0.00589791	0.0160148	6.67576	5.04965
RNY1	-2.92658	0.00612905	0.0165822	4.37586	3.30219
SERPINI2	2.75042	0.00628988	0.016977	3.73825	5.16672
POU3F1	-3.39346	0.00629712	0.0169908	4.16373	3.197
FMOD	-2.73683	0.00629656	0.0169908	3.96949	3.20285
CCL24	-3.65644	0.00635217	0.0171239	3.94508	3.01992
TNC	2.9608	0.00640237	0.0172399	3.42809	4.59089
HCAR2	-2.39173	0.00646684	0.0174003	10.3492	7.23889
LOC440157	3.92697	0.00648549	0.0174466	2.82987	3.83916
ZNF890P	2.70889	0.00649324	0.0174622	4.48581	6.76794
MORN4	2.47456	0.00669349	0.0179239	3.5782	4.47918
CT47A12	4.15989	0.00670759	0.0179526	3.60133	5.25441
HCG4	2.26552	0.00672575	0.0179905	3.43626	4.61959
CT47B1	5.74655	0.00673711	0.0180128	2.82987	4.14811
TDRD12	5.7227	0.00677134	0.0180962	2.82987	4.01309
LY6K	-3.93194	0.00679515	0.0181517	3.95598	2.99457
LOC392196	2.27881	0.0067976	0.0181556	4.82769	6.92052
LOC101930434	2.03711	0.00682049	0.0182005	4.02869	5.12814
IL10RB-AS1	2.02125	0.00684901	0.0182603	3.69004	4.48611
TRNQ	-3.67923	0.00692316	0.018423	4.64008	3.39865
SIM2	3.48902	0.0069422	0.0184676	2.82987	3.71496
OR7E91P	2.00627	0.00698451	0.0185554	3.74316	4.78115
LRIT3	3.4588	0.00701533	0.0186208	3.09675	4.45199
GUCY2D	2.10547	0.00717695	0.0189992	3.69084	4.68135
CYP3A4	2.49466	0.00719542	0.0190332	3.99956	5.34717
GPM6A	2.45676	0.0072002	0.0190333	3.64418	4.7989
TMEM150C	2.85738	0.00723242	0.0190981	3.19363	4.14535
GCM2	3.92633	0.0072695	0.0191819	2.82987	3.73659
UNC13A	-3.78359	0.00727509	0.0191939	3.97453	3.01992
SVILP1	2.51995	0.00731173	0.0192735	3.40437	4.73964
FAM177B	2.18335	0.00741405	0.0195117	3.73309	4.65603
LOC101928344	4.06782	0.0074598	0.0196178	2.97964	4.07211
KCNA6	2.51473	0.00773141	0.0202638	3.45823	4.51444
CPNE7	-2.06433	0.00786944	0.0205805	4.49179	3.53974
CYP2J2	3.07244	0.00798702	0.0208637	3.24821	4.44726
IDO1	2.34292	0.00803832	0.0209826	3.78969	4.82198
C5orf20	3.6286	0.00805776	0.0210179	2.99493	3.84973
SNORD52	-2.01263	0.00813121	0.0211879	4.50189	3.66526
C7orf71	3.33169	0.00824727	0.0214623	3.13603	4.0931
SLC47A2	3.84421	0.00836283	0.0217347	2.99493	3.93892
MYO18B	3.24431	0.00866648	0.0224426	3.48403	4.748
DPYSL3	-3.29326	0.0086973	0.0225008	4.989	3.16407
PLG	2.48609	0.00869772	0.0225008	3.71161	4.8382
FLJ44342	-2.93879	0.00870443	0.0225116	4.04884	3.17059
PRSS21	2.36517	0.00873087	0.022567	4.24664	5.6194
LOC102724583	-2.53058	0.00873716	0.02258	4.09808	3.30104
GJC2	-2.24904	0.00883683	0.0228024	5.76392	4.16065
STBD1	2.778	0.00888337	0.0229018	3.71076	5.36547
GIPC2	3.25087	0.00905374	0.0232715	2.98329	3.85355
PAPPA	2.34427	0.00908913	0.0233451	3.46189	4.45806
IL2	-2.44001	0.00909359	0.0233532	4.78573	3.67024
ARHGAP8	-2.45027	0.00912328	0.0234228	4.51717	3.47904
RAI14	2.73801	0.00915924	0.0234983	3.56434	4.76585
SPTSSB	3.14852	0.00928514	0.0237669	3.0402	4.04236
CALB1	2.93385	0.00936595	0.0239567	3.19914	4.23216
LOC100129216	2.27907	0.00937154	0.0239676	3.51806	4.577
ZNF391	2.22196	0.00948122	0.0242296	3.82503	5.10362
C7orf55-LUC7L2	-2.11748	0.00962586	0.0245585	6.40521	4.80566
LOC102723908	3.13098	0.00969876	0.0247304	3.04527	4.07462
PGBD5	3.389	0.00972347	0.0247829	2.98626	3.73287
SLC22A3	3.50038	0.00981939	0.0249954	2.98626	3.78166
SPR	2.07266	0.00991524	0.0252215	3.48166	4.30465
C6orf165	-2.99959	0.00992853	0.0252446	4.07062	3.24804
OVCH1-AS1	3.20633	0.00997373	0.025356	3.26477	4.24453
NBL1	-2.98854	0.0101622	0.0257839	5.0731	3.51121
LRRC20	2.90082	0.0102005	0.0258665	3.27169	4.432
VTRNA2-1	-2.47905	0.0102098	0.0258829	4.08524	3.31544
F2	2.21767	0.0102468	0.0259654	3.57439	4.52672
FERMT1	3.52837	0.0102883	0.0260561	2.82987	3.58489
MYRIP	2.45188	0.0104247	0.0263532	3.52774	4.64371
LIX1	2.49108	0.0104528	0.0264057	3.48289	4.46161
RPS10-NUDT3	-2.7373	0.0105777	0.0266836	5.20851	3.58442
GSTM1	3.20969	0.0106648	0.0268692	3.1966	4.27633
JAKMIP2-AS1	4.79962	0.0107176	0.0269911	2.98626	4.3269
RNF157-AS1	2.27413	0.0107751	0.0271244	3.62821	4.793
NTRK2	-2.22367	0.0111643	0.0279513	4.96474	3.73496
CDHR4	-3.60573	0.0112124	0.0280637	4.17804	3.07883
TRNW	-4.08611	0.0112231	0.0280867	4.66919	3.23986
TRNT	-2.76459	0.0112269	0.0280885	4.36238	3.64944
ADAMTS14	3.06038	0.011307	0.0282731	2.98626	3.79614
SLC1A7	2.39136	0.0113818	0.0284522	3.94717	4.96718
TUBA3E	-2.46281	0.0113915	0.0284684	5.01947	3.79534
LOC102724135	4.91206	0.0114033	0.0284939	2.82987	3.81955
GDF15	-2.10543	0.0114332	0.0285528	4.80224	3.849
LINC00861	3.20869	0.0114833	0.0286638	3.13969	4.13039
ADH1A	4.22911	0.0116037	0.0289223	2.82987	3.7458
BEST4	-2.22516	0.0116643	0.0290531	4.54385	3.50464
RLN2	2.15471	0.0116767	0.02908	3.70753	4.65017
LGALS9B	2.72849	0.0117319	0.0292014	4.62265	6.48655
CNNM1	2.79595	0.0117542	0.0292487	3.29813	4.16735
CYP4F3	2.8935	0.0117724	0.0292899	3.60419	5.06443
TUSC3	-3.33637	0.011837	0.029426	3.41524	2.82987
GOLGA8CP	-5.95552	0.0118871	0.0295262	3.56838	2.82987
SLC8A2	-4.69176	0.0119927	0.0297431	3.89465	2.82987
ANXA8L1	3.04551	0.0121338	0.0300432	4.04154	5.99118
SH2D4A	2.46544	0.0123896	0.0306091	3.35869	4.08785
DDN	-2.49361	0.0125067	0.0308595	4.00965	3.27566
KCNV2	2.7197	0.0125407	0.0309229	3.15595	4.39553
SLC5A4	2.42033	0.0126655	0.0311847	3.59019	4.62671
INHBA	-2.6572	0.0127624	0.0314004	4.23896	3.27919
NCKAP5	2.45892	0.012861	0.0316213	3.51509	4.31085
FGFR4	-2.10982	0.0129579	0.0318377	4.33257	3.62153
MOCS1	2.1478	0.0130383	0.0320003	4.19024	5.81258
RAG1	2.07314	0.0134137	0.0328141	4.10113	5.38965
DPYD-AS1	2.75912	0.0135571	0.0331151	3.21444	4.1928
RP11-362F19.1	3.74747	0.0136236	0.0332686	2.98329	3.87759
GALNTL6	3.54425	0.0136362	0.0332902	3.15133	4.17456
TRNP	-2.16613	0.0136753	0.033363	4.89951	4.0791
FBXW10	3.67346	0.0137127	0.0334361	2.82987	3.53823
TRNA	-3.19316	0.0137945	0.0336083	4.72247	3.61458
CNN1	3.87513	0.0138054	0.0336257	2.99493	3.94337
HOXA6	-3.9038	0.0140261	0.0340892	3.69372	2.92069
KCNA2	2.84621	0.0140807	0.0342034	3.43063	4.60216
GPR150	3.7038	0.0141087	0.034257	3.04527	4.20802
SLC13A3	3.39306	0.0143708	0.0347716	2.82987	3.66729
DEFA1	2.41253	0.0145419	0.035124	5.21431	7.32265
MMP8	4.15018	0.014609	0.0352624	2.97964	3.86729
TEDDM1	2.32517	0.014669	0.0353834	3.50102	4.51724
CHL1	2.78556	0.0146899	0.0354195	3.91555	4.97667
LOC100126784	-3.25885	0.0148318	0.0357424	3.52077	2.92747
SPAG17	2.54731	0.0148727	0.035817	3.4072	4.38755
WNK3	3.09696	0.0149889	0.0360533	3.31723	4.73166
DYTN	-2.10616	0.0150119	0.0360941	4.35669	3.57731
ALOX15	2.96976	0.0151951	0.0364905	2.82987	3.47892
TRNM	-2.42996	0.0152582	0.0366275	4.89279	3.94944
TCL6	3.78825	0.0153019	0.0367078	3.14836	4.35924
CYP3A7-CYP3AP1	2.13065	0.0153169	0.0367291	4.6695	6.56748
BEX1	-2.15248	0.0153849	0.0368725	5.0295	3.81215
SH3BGR	2.12214	0.0155486	0.0371903	3.59337	4.52553
AIRE	2.47014	0.0156676	0.0374331	3.4797	4.46705
OR4F21	3.3403	0.0157759	0.0376708	3.29623	5.29173
HAVCR1P1	2.26463	0.0162045	0.0385587	3.36787	4.13237
ARHGAP44	2.62039	0.0162326	0.0386204	3.19914	4.05796
ZSCAN23	3.4918	0.0163443	0.0388656	3.13603	4.19236
MFSD6L	2.2993	0.0165207	0.0392228	3.43644	4.40268
COL4A5	2.95493	0.0167699	0.0396883	2.98626	3.57848
TMEM151A	-3.55207	0.0168829	0.0399296	3.44188	2.82987
ADH4	3.21591	0.0170156	0.0402116	2.99493	3.82914
CRYBB1	2.81338	0.0170684	0.0403311	2.82987	3.39715
LRRC3	2.99816	0.0174269	0.0411023	2.98626	3.75083
LOC102724428	-2.82775	0.0175598	0.0413778	11.524	7.41915
PCSK1	2.05894	0.017609	0.041472	3.71749	4.80942
IL5RA	2.51239	0.0177873	0.0418369	4.00514	5.06286
CXCL10	2.68734	0.0178326	0.041916	3.77403	4.71661
PTGFR	4.80202	0.0181628	0.0426196	2.82987	3.91007
LOC100996634	2.66848	0.0182578	0.0428034	4.12979	5.09453
RNY4	-2.86588	0.0184254	0.0431401	4.07911	3.21022
PXT1	-2.95737	0.0185179	0.0433397	3.86142	3.05702
ESRP1	3.14126	0.0185856	0.0434868	2.82987	3.60986
XG	2.57829	0.0186281	0.0435691	3.58292	4.37153
OR2H2	2.28483	0.0186592	0.0436247	3.6338	4.482
EEF1A2	-2.13074	0.0188013	0.0439285	4.4619	3.56049
FOXC2	-4.09268	0.018925	0.044183	4.08308	2.99457
GPR98	2.50585	0.0190774	0.0444925	4.07933	5.47693
CLEC3B	2.35581	0.0191076	0.0445571	3.42809	4.3388
DUOXA1	-3.63177	0.0194248	0.0452198	3.73534	2.9291
TRNV	-3.38835	0.0195425	0.0454531	4.92303	3.55673
AC007038.7	2.86661	0.0198357	0.0460574	3.13306	3.96729
STC1	-4.0505	0.0202184	0.0468612	3.58191	2.82987
SCRG1	2.04245	0.0202754	0.0469705	3.49626	4.29072
ENTPD8	2.99651	0.020409	0.047242	3.15133	4.01415
ZNF311	2.18961	0.0204672	0.0473645	3.51128	4.4187
C1orf173	2.86748	0.0205758	0.0475729	3.29813	4.21942
ZAR1	2.85789	0.020915	0.0483135	3.1447	3.98457
DLL4	-2.75846	0.0212115	0.0488791	4.05775	3.12557
OR4M2	-2.2034	0.0212551	0.0489607	4.81387	3.91262
LOC101930071	2.6931	0.0212584	0.048962	3.3011	4.13149
VASH2	-2.30516	0.0212643	0.0489647	4.49492	3.78291
RNF103-CHMP3	2.96417	0.0214522	0.0493198	3.15595	4.47735
SMKR1	3.29104	0.0215207	0.0494393	3.1447	3.98464
DEFA3	4.29681	0.0215721	0.0495383	3.57461	5.93609
EPPIN	-3.27511	0.0215854	0.0495624	3.51723	2.9291
SLCO2B1	2.41318	0.0215895	0.0495656	3.09675	3.9183

## Sheet: C
Table S2_37 genes MPEs Mφ signature
	Gene Name	Ensembl ID	Description
	APOC1	ENSG00000130208	apolipoprotein C1 [Source:HGNC Symbol;Acc:HGNC:607]
	C1QA	ENSG00000173372	complement C1q A chain [Source:HGNC Symbol;Acc:HGNC:1241]
	C1QB	ENSG00000173369	complement C1q B chain [Source:HGNC Symbol;Acc:HGNC:1242]
	C1QC	ENSG00000159189	complement C1q C chain [Source:HGNC Symbol;Acc:HGNC:1245]
	C4B	ENSG00000224389	complement C4B (Chido blood group) [Source:HGNC Symbol;Acc:HGNC:1324]
	CCL18	ENSG00000275385	C-C motif chemokine ligand 18 [Source:HGNC Symbol;Acc:HGNC:10616]
	CD163	ENSG00000177575	CD163 molecule [Source:HGNC Symbol;Acc:HGNC:1631]
	CFB	ENSG00000243649	complement factor B [Source:HGNC Symbol;Acc:HGNC:1037]
	CFH	ENSG00000000971	complement factor H [Source:HGNC Symbol;Acc:HGNC:4883]
	COLEC12	ENSG00000158270	collectin subfamily member 12 [Source:HGNC Symbol;Acc:HGNC:16016]
	CTSL	ENSG00000135047	cathepsin L [Source:HGNC Symbol;Acc:HGNC:2537]
	CXCL10	ENSG00000169245	C-X-C motif chemokine ligand 10 [Source:HGNC Symbol;Acc:HGNC:10637]
	CXCL16	ENSG00000161921	C-X-C motif chemokine ligand 16 [Source:HGNC Symbol;Acc:HGNC:16642]
	CYP27A1	ENSG00000135929	cytochrome P450 family 27 subfamily A member 1 [Source:HGNC Symbol;Acc:HGNC:2605]
	DAB2	ENSG00000153071	DAB adaptor protein 2 [Source:HGNC Symbol;Acc:HGNC:2662]
	DOCK1	ENSG00000150760	dedicator of cytokinesis 1 [Source:HGNC Symbol;Acc:HGNC:2987]
	FAM20A	ENSG00000108950	FAM20A golgi associated secretory pathway pseudokinase [Source:HGNC Symbol;Acc:HGNC:23015]
	FN1	ENSG00000115414	fibronectin 1 [Source:HGNC Symbol;Acc:HGNC:3778]
	HMOX1	ENSG00000100292	heme oxygenase 1 [Source:HGNC Symbol;Acc:HGNC:5013]
	IL10	ENSG00000136634	interleukin 10 [Source:HGNC Symbol;Acc:HGNC:5962]
	IL1A	ENSG00000115008	interleukin 1 alpha [Source:HGNC Symbol;Acc:HGNC:5991]
	IL6	ENSG00000136244	interleukin 6 [Source:HGNC Symbol;Acc:HGNC:6018]
	LYVE1	ENSG00000133800	lymphatic vessel endothelial hyaluronan receptor 1 [Source:HGNC Symbol;Acc:HGNC:14687]
	MERTK	ENSG00000153208	MER proto-oncogene, tyrosine kinase [Source:HGNC Symbol;Acc:HGNC:7027]
	MRC1	ENSG00000260314	mannose receptor C-type 1 [Source:HGNC Symbol;Acc:HGNC:7228]
	MSR1	ENSG00000038945	macrophage scavenger receptor 1 [Source:HGNC Symbol;Acc:HGNC:7376]
	MTUS1	ENSG00000129422	microtubule associated scaffold protein 1 [Source:HGNC Symbol;Acc:HGNC:29789]
	MYO7A	ENSG00000137474	myosin VIIA [Source:HGNC Symbol;Acc:HGNC:7606]
	PRG4	ENSG00000116690	proteoglycan 4 [Source:HGNC Symbol;Acc:HGNC:9364]
	PTGIS	ENSG00000124212	prostaglandin I2 synthase [Source:HGNC Symbol;Acc:HGNC:9603]
	SERPINE1	ENSG00000106366	serpin family E member 1 [Source:HGNC Symbol;Acc:HGNC:8583]
	SIGLEC1	ENSG00000088827	sialic acid binding Ig like lectin 1 [Source:HGNC Symbol;Acc:HGNC:11127]
	SLCO2B1	ENSG00000137491	solute carrier organic anion transporter family member 2B1 [Source:HGNC Symbol;Acc:HGNC:10962]
	TGM2	ENSG00000198959	transglutaminase 2 [Source:HGNC Symbol;Acc:HGNC:11778]
	TIMD4	ENSG00000145850	T cell immunoglobulin and mucin domain containing 4 [Source:HGNC Symbol;Acc:HGNC:25132]
	TMEM51	ENSG00000171729	transmembrane protein 51 [Source:HGNC Symbol;Acc:HGNC:25488]
	VSIG4	ENSG00000155659	V-set and immunoglobulin domain containing 4 [Source:HGNC Symbol;Acc:HGNC:17032]
