# Supplementary material for: Deconvolution of malignant pleural effusions immune landscape unravels a novel macrophage signature associated with worse clinical outcome in lung adenocarcinoma patients
Source: HighWire-hosted journal article supplement (doi:10.1136/jitc-2021-004239), 2022-05-01
Supplement: jitc-2021-004239supp006_data_supplement.xlsx [file jitc-2021-004239supp006_data_supplement.xlsx]

## Sheet: A
Table S3_GO Biological Process_LUAD PBMC vs HD PBMC_up genes
Term	Overlap	P.value	Adjusted.P.value	Old.P.value	Old.Adjusted.P.value	Odds.Ratio	Combined.Score	Genes
pyroptosis (GO:0070269)	4/10	0.00051531	0.829529	0	0	15.3896	116.51	GSDMB;AIM2;GSDMA;NLRC4
negative regulation of T cell mediated immunity (GO:0002710)	3/7	0.00222916	0.829529	0	0	17.2942	105.601	CEACAM1;HFE;LILRB1
icosanoid metabolic process (GO:0006690)	7/46	0.00276618	0.829529	0	0	4.15121	24.4518	CYP2J2;ALOX15;PLA2G4C;CYP4F3;CYP1B1;CYP4F22;ALOX15B
regulation of chemokine secretion (GO:0090196)	3/8	0.00345645	0.829529	0	0	13.8347	78.4081	CSF1R;LPL;ALOX15B
positive regulation of chemokine secretion (GO:0090197)	3/8	0.00345645	0.829529	0	0	13.8347	78.4081	CSF1R;LPL;ALOX15B
interleukin-1 beta secretion (GO:0050702)	3/8	0.00345645	0.829529	0	0	13.8347	78.4081	AIM2;NLRC4;CD36
dendritic cell chemotaxis (GO:0002407)	4/16	0.00365609	0.829529	0	0	7.69237	43.1647	TRPM2;CXCR1;CXCR2;CCR2
neutrophil activation involved in immune response (GO:0002283)	33/483	0.00391012	0.829529	0	0	1.71349	9.49992	CLEC12A;HFE;PTAFR;FGL2;MOSPD2;PLD1;TRPM2;HK3;MMP25;CXCR1;STBD1;CXCR2;CD36;PRSS2;ATP8B4;IDH1;CYBB;RNASE3;DEFA1;RNASE2;MMP8;CPPED1;OSCAR;PTPRB;CEACAM1;SELL;MNDA;DNASE1;DSC1;S100A9;S100A8;HSPA1A;SIGLEC5
positive regulation of response to external stimulus (GO:0032103)	10/90	0.00423687	0.829529	0	0	2.89533	15.8199	PDGFRB;NLRP12;LPL;PLG;F2;USP17L2;S100A9;S100A8;SASH1;CCR2
positive regulation of monocyte chemotaxis (GO:0090026)	4/17	0.00462505	0.829529	0	0	7.10028	38.173	CXCL10;MOSPD2;CXCL17;CCR2
negative regulation of lipid biosynthetic process (GO:0051055)	4/17	0.00462505	0.829529	0	0	7.10028	38.173	CEACAM1;GPER1;SIK1;BRCA1
interleukin-1 beta production (GO:0032611)	3/9	0.00502482	0.829529	0	0	11.5283	61.0234	AIM2;NLRC4;CD36
interleukin-1 secretion (GO:0050701)	3/9	0.00502482	0.829529	0	0	11.5283	61.0234	AIM2;NLRC4;CD36
T cell mediated immunity (GO:0002456)	3/9	0.00502482	0.829529	0	0	11.5283	61.0234	AIRE;BTN3A3;BTN3A2
detection of chemical stimulus involved in sensory perception of bitter taste (GO:0001580)	6/40	0.00589941	0.829529	0	0	4.07758	20.9298	TAS2R10;TAS2R13;TAS2R14;TAS2R3;TAS2R5;TAS2R4
neutrophil degranulation (GO:0043312)	32/479	0.00616191	0.829529	0	0	1.6709	8.50383	CLEC12A;HFE;PTAFR;FGL2;MOSPD2;PLD1;TRPM2;HK3;MMP25;CXCR1;STBD1;CXCR2;CD36;PRSS2;ATP8B4;IDH1;CYBB;RNASE3;DEFA1;RNASE2;MMP8;CPPED1;OSCAR;PTPRB;CEACAM1;SELL;MNDA;DSC1;S100A9;S100A8;HSPA1A;SIGLEC5
sensory perception of bitter taste (GO:0050913)	6/41	0.00667226	0.829529	0	0	3.96087	19.8432	TAS2R10;TAS2R13;TAS2R14;TAS2R3;TAS2R5;TAS2R4
tryptophan catabolic process (GO:0006569)	3/10	0.00695748	0.829529	0	0	9.88087	49.0875	AFMID;KMO;IDO1
primary alcohol metabolic process (GO:0034308)	4/19	0.00704982	0.829529	0	0	6.15293	30.4863	PECR;ADH4;NAPEPLD;CYP1B1
positive regulation of mononuclear cell migration (GO:0071677)	4/19	0.00704982	0.829529	0	0	6.15293	30.4863	CXCL10;MOSPD2;CXCL17;CCR2
drug transport (GO:0015893)	4/19	0.00704982	0.829529	0	0	6.15293	30.4863	SLC47A2;SLC22A3;SLC15A2;ATP8B1
regulation of defense response to virus by host (GO:0050691)	5/30	0.00745748	0.836552	0	0	4.61785	22.6207	AIM2;DDX58;IL23R;LILRB1;USP17L2
neutrophil mediated immunity (GO:0002446)	32/487	0.0077866	0.836552	0	0	1.64082	7.96676	CLEC12A;HFE;PTAFR;FGL2;MOSPD2;PLD1;TRPM2;HK3;MMP25;CXCR1;STBD1;CXCR2;CD36;PRSS2;ATP8B4;IDH1;CYBB;RNASE3;DEFA1;RNASE2;MMP8;CPPED1;OSCAR;PTPRB;CEACAM1;SELL;MNDA;DSC1;S100A9;S100A8;HSPA1A;SIGLEC5
interferon-gamma-mediated signaling pathway (GO:0060333)	8/70	0.00851403	0.862976	0	0	2.9843	14.2233	HCK;OAS1;TRIM5;HFE;PTAFR;HLA-G;FCGR1B;TRIM34
drug transmembrane transport (GO:0006855)	3/11	0.00927288	0.862976	0	0	8.64531	40.4658	SLC47A2;SLC22A3;ATP8B1
detection of chemical stimulus involved in sensory perception of taste (GO:0050912)	6/44	0.00942952	0.862976	0	0	3.6476	17.0121	TAS2R10;TAS2R13;TAS2R14;TAS2R3;TAS2R5;TAS2R4
unsaturated fatty acid metabolic process (GO:0033559)	6/44	0.00942952	0.862976	0	0	3.6476	17.0121	CYP2J2;ALOX15;PLA2G4C;HSD17B4;CYP1B1;ALOX15B
positive regulation of defense response to virus by host (GO:0002230)	4/21	0.0101907	0.88984	0	0	5.42849	24.8966	AIM2;DDX58;IL23R;LILRB1
regulation of monocyte chemotaxis (GO:0090025)	4/22	0.0120521	0.88984	0	0	5.12664	22.6521	CXCL10;MOSPD2;CXCL17;CCR2
regulation of heart rate by cardiac conduction (GO:0086091)	5/35	0.0143242	0.88984	0	0	3.84721	16.3345	KCNH2;CACNB2;KCNE3;SCN5A;KCNJ2
leukocyte differentiation (GO:0002521)	3/13	0.0151046	0.88984	0	0	6.91552	28.9951	TRPM2;FLT3;LILRB1
extracellular matrix disassembly (GO:0022617)	8/78	0.0158469	0.88984	0	0	2.64213	10.9511	ADAMTS5;PRSS1;SH3PXD2B;HTRA1;PLG;MMP8;A2M;PRSS2
positive regulation of immune effector process (GO:0002699)	4/24	0.0163948	0.88984	0	0	4.61349	18.9651	IL23R;LILRB1;USP17L2;CCR2
positive regulation of calcium ion transmembrane transport (GO:1904427)	4/25	0.0188889	0.88984	0	0	4.39357	17.4389	CACNB2;CXCL10;GPER1;F2
positive regulation of cAMP metabolic process (GO:0030816)	4/26	0.0216053	0.88984	0	0	4.19365	16.0819	CXCL10;GPER1;RLN2;TSHR
regulation of inflammatory response (GO:0050727)	13/166	0.0218886	0.88984	0	0	1.9677	7.52014	CXCL17;LPL;NR1H3;HCK;NLRP12;CASP5;GPER1;FFAR4;TNFAIP8L2;DNASE1;S100A9;S100A8;CCR2
negative regulation of axon extension involved in axon guidance (GO:0048843)	3/15	0.0225887	0.88984	0	0	5.76233	21.841	SEMA3C;SEMA3D;SEMA3A
regulation of T cell mediated cytotoxicity (GO:0001914)	3/15	0.0225887	0.88984	0	0	5.76233	21.841	CEACAM1;IL23R;LILRB1
nucleobase-containing small molecule catabolic process (GO:0034656)	3/15	0.0225887	0.88984	0	0	5.76233	21.841	ENTPD3;ENTPD8;NUDT18
protein repair (GO:0030091)	2/6	0.0232949	0.88984	0	0	11.5156	43.2932	MSRB2;MSRB1
N-acetylneuraminate catabolic process (GO:0019262)	2/6	0.0232949	0.88984	0	0	11.5156	43.2932	NAGK;NPL
amino sugar catabolic process (GO:0046348)	2/6	0.0232949	0.88984	0	0	11.5156	43.2932	NAGK;NPL
iron ion import across plasma membrane (GO:0098711)	2/6	0.0232949	0.88984	0	0	11.5156	43.2932	STEAP4;HFE
immune response-inhibiting cell surface receptor signaling pathway (GO:0002767)	2/6	0.0232949	0.88984	0	0	11.5156	43.2932	LILRB1;HLA-G
regulation of protein K63-linked ubiquitination (GO:1900044)	2/6	0.0232949	0.88984	0	0	11.5156	43.2932	PARP10;SASH1
negative regulation of leukocyte degranulation (GO:0043301)	2/6	0.0232949	0.88984	0	0	11.5156	43.2932	CEACAM1;CCR2
regulation of vascular endothelial growth factor production (GO:0010574)	4/27	0.0245485	0.88984	0	0	4.01111	14.8696	CXCL17;CYP1B1;BRCA1;CCR2
metal ion transport (GO:0030001)	9/101	0.0251494	0.88984	0	0	2.26174	8.32981	SLC5A9;KCNA2;SCN5A;KCNA6;SLC4A4;KCNJ1;SLC5A4;KCNJ2;KCNH1
long-chain fatty acid metabolic process (GO:0001676)	6/55	0.0264077	0.88984	0	0	2.82712	10.274	CYP2J2;PLA2G4C;ALOX15;CYP1B1;HSD17B4;ALOX15B
glucose transmembrane transport (GO:1904659)	3/16	0.0269578	0.88984	0	0	5.3188	19.2194	SLC2A9;SLC5A9;SLC5A4
epithelial cell development (GO:0002064)	3/16	0.0269578	0.88984	0	0	5.3188	19.2194	WNT5B;POF1B;TMEM79
positive regulation of macrophage derived foam cell differentiation (GO:0010744)	3/16	0.0269578	0.88984	0	0	5.3188	19.2194	LPL;CD36;ALOX15B
aorta morphogenesis (GO:0035909)	3/16	0.0269578	0.88984	0	0	5.3188	19.2194	ACVRL1;PDGFRB;BMPR1A
regulation of membrane repolarization (GO:0060306)	3/16	0.0269578	0.88984	0	0	5.3188	19.2194	KCNH2;KCNE3;KCNJ2
regulation of cytosolic calcium ion concentration (GO:0051480)	11/137	0.0283799	0.88984	0	0	2.01971	7.19436	PTGFR;CALB1;GPER1;OPRL1;ATP2B4;CD36;TACR1;F2;MCHR1;PTGDR;CCR2
monovalent inorganic cation transport (GO:0015672)	9/104	0.0296873	0.88984	0	0	2.18997	7.70221	SLC5A9;KCNA2;SCN5A;KCNA6;SLC4A4;KCNJ1;SLC5A4;KCNJ2;KCNH1
regulation of macrophage derived foam cell differentiation (GO:0010743)	4/29	0.0311285	0.88984	0	0	3.68983	12.8024	LPL;NR1H3;CD36;ALOX15B
AV node cell action potential (GO:0086016)	2/7	0.0317212	0.88984	0	0	9.21202	31.7886	CACNB2;SCN5A
dorsal aorta development (GO:0035907)	2/7	0.0317212	0.88984	0	0	9.21202	31.7886	ACVRL1;BMPR1A
leukocyte aggregation (GO:0070486)	2/7	0.0317212	0.88984	0	0	9.21202	31.7886	S100A9;S100A8
positive regulation of macrophage migration (GO:1905523)	2/7	0.0317212	0.88984	0	0	9.21202	31.7886	CXCL17;CMKLR1
regulation of dendritic cell differentiation (GO:2001198)	2/7	0.0317212	0.88984	0	0	9.21202	31.7886	LILRB1;HLA-G
negative regulation of alpha-beta T cell activation (GO:0046636)	2/7	0.0317212	0.88984	0	0	9.21202	31.7886	HFE;LILRB1
dorsal aorta morphogenesis (GO:0035912)	2/7	0.0317212	0.88984	0	0	9.21202	31.7886	ACVRL1;BMPR1A
xenobiotic catabolic process (GO:0042178)	2/7	0.0317212	0.88984	0	0	9.21202	31.7886	GSTM4;GSTM1
positive regulation of macrophage chemotaxis (GO:0010759)	2/7	0.0317212	0.88984	0	0	9.21202	31.7886	CXCL17;CMKLR1
negative regulation of axon guidance (GO:1902668)	3/17	0.0317434	0.88984	0	0	4.93863	17.0386	SEMA3C;SEMA3D;SEMA3A
positive regulation of G-protein coupled receptor protein signaling pathway (GO:0045745)	3/17	0.0317434	0.88984	0	0	4.93863	17.0386	LRRK2;GPER1;F2
defense response to fungus (GO:0050832)	3/17	0.0317434	0.88984	0	0	4.93863	17.0386	CLEC6A;S100A9;S100A8
membrane depolarization during cardiac muscle cell action potential (GO:0086012)	3/17	0.0317434	0.88984	0	0	4.93863	17.0386	CACNB2;SCN5A;KCNJ2
positive regulation of protein localization to plasma membrane (GO:1903078)	5/43	0.0324026	0.88984	0	0	3.036	10.412	ITGA3;GPER1;WNK3;STAC3;EPHB2
nucleobase-containing compound catabolic process (GO:0034655)	5/43	0.0324026	0.88984	0	0	3.036	10.412	ENTPD3;NUDT18;ENTPD8;RNASE3;RNASE2
smoothened signaling pathway (GO:0007224)	4/30	0.0347702	0.88984	0	0	3.54773	11.9168	ARL13B;IFT27;CC2D2A;DISP1
regulation of cation transmembrane transport (GO:1904062)	4/30	0.0347702	0.88984	0	0	3.54773	11.9168	KCNH2;KCNE3;ATP2B4;SCN5A
negative regulation of immune response (GO:0050777)	5/44	0.0353478	0.88984	0	0	2.958	9.88716	NLRP12;ALOX15;LILRB1;HLA-G;CCR2
positive regulation of cyclic nucleotide biosynthetic process (GO:0030804)	3/18	0.0369415	0.88984	0	0	4.60915	15.2029	GPER1;RLN2;TSHR
regulation of lipopolysaccharide-mediated signaling pathway (GO:0031664)	3/18	0.0369415	0.88984	0	0	4.60915	15.2029	TRIM5;CARD8;SASH1
piRNA metabolic process (GO:0034587)	3/18	0.0369415	0.88984	0	0	4.60915	15.2029	TDRKH;TDRD9;TDRD12
negative regulation of cytokine production (GO:0001818)	9/110	0.0404178	0.88984	0	0	2.05923	6.607	CEACAM1;NLRP12;DDX58;IL23R;FFAR4;LILRB1;F2;IKBKE;CMKLR1
defense response to protozoan (GO:0042832)	2/8	0.0411428	0.88984	0	0	7.67628	24.4928	DEFA1;LYST
negative regulation of interleukin-1 production (GO:0032692)	2/8	0.0411428	0.88984	0	0	7.67628	24.4928	NLRP12;CEACAM1
negative regulation of leukocyte mediated cytotoxicity (GO:0001911)	2/8	0.0411428	0.88984	0	0	7.67628	24.4928	CEACAM1;LILRB1
regulation of microvillus organization (GO:0032530)	2/8	0.0411428	0.88984	0	0	7.67628	24.4928	ATP8B1;PLD1
DNA damage induced protein phosphorylation (GO:0006975)	2/8	0.0411428	0.88984	0	0	7.67628	24.4928	CHEK2;MAP2K6
regulation of striated muscle cell differentiation (GO:0051153)	2/8	0.0411428	0.88984	0	0	7.67628	24.4928	SIK1;HDAC9
kynurenine metabolic process (GO:0070189)	2/8	0.0411428	0.88984	0	0	7.67628	24.4928	AFMID;KMO
negative regulation of biosynthetic process (GO:0009890)	2/8	0.0411428	0.88984	0	0	7.67628	24.4928	CEACAM1;GPER1
calcium ion import into cytosol (GO:1902656)	2/8	0.0411428	0.88984	0	0	7.67628	24.4928	TRPM2;ATP2B4
calcium ion import across plasma membrane (GO:0098703)	2/8	0.0411428	0.88984	0	0	7.67628	24.4928	TRPM2;ATP2B4
regulation of peroxisome proliferator activated receptor signaling pathway (GO:0035358)	2/8	0.0411428	0.88984	0	0	7.67628	24.4928	ASXL2;ALOX15
positive regulation of protein localization to cell periphery (GO:1904377)	5/46	0.0417196	0.88984	0	0	2.81341	8.9376	ITGA3;GPER1;WNK3;STAC3;EPHB2
calcium ion transport into cytosol (GO:0060402)	3/19	0.0425462	0.88984	0	0	4.32085	13.6416	JPH4;TRPM2;ATP2B4
hexose transmembrane transport (GO:0035428)	3/19	0.0425462	0.88984	0	0	4.32085	13.6416	SLC2A9;SLC5A9;SLC5A4
innate immune response in mucosa (GO:0002227)	3/19	0.0425462	0.88984	0	0	4.32085	13.6416	DEFA3;DEFA1;RNASE3
regulation of cAMP biosynthetic process (GO:0030817)	3/19	0.0425462	0.88984	0	0	4.32085	13.6416	GPER1;RLN2;TSHR
negative regulation of inflammatory response (GO:0050728)	7/78	0.043864	0.88984	0	0	2.27643	7.11762	NLRP12;GPER1;CXCL17;FFAR4;NR1H3;TNFAIP8L2;F2
peptidyl-tyrosine phosphorylation (GO:0018108)	7/79	0.0464749	0.88984	0	0	2.24469	6.88861	PDGFRB;HCK;CSF1R;FLT3;STYK1;EPHB2;BMX
regulation of cell-substrate adhesion (GO:0010810)	4/33	0.0471157	0.88984	0	0	3.18022	9.71606	FZD4;ALOX15;SPOCK1;PLG
androgen metabolic process (GO:0008209)	3/20	0.0485498	0.88984	0	0	4.06647	12.3017	HSD17B4;CYP3A4;CYP17A1
aromatic amino acid family catabolic process (GO:0009074)	3/20	0.0485498	0.88984	0	0	4.06647	12.3017	KMO;ASRGL1;IDO1
regulation of toll-like receptor signaling pathway (GO:0034121)	3/20	0.0485498	0.88984	0	0	4.06647	12.3017	FCRL3;CD36;TLR5
positive regulation of cAMP biosynthetic process (GO:0030819)	3/20	0.0485498	0.88984	0	0	4.06647	12.3017	GPER1;RLN2;TSHR
intrinsic apoptotic signaling pathway in response to DNA damage (GO:0008630)	5/48	0.0487409	0.88984	0	0	2.68227	8.10378	CHEK2;CIDEB;BRCA1;IKBKE;TP63
long-chain fatty acid biosynthetic process (GO:0042759)	2/9	0.0514622	0.88984	0	0	6.57933	19.5203	ALOX15;ALOX15B
regulation of T-helper 1 type immune response (GO:0002825)	2/9	0.0514622	0.88984	0	0	6.57933	19.5203	IL23R;CCR2
negative regulation of natural killer cell mediated cytotoxicity (GO:0045953)	2/9	0.0514622	0.88984	0	0	6.57933	19.5203	CEACAM1;LILRB1
indolalkylamine catabolic process (GO:0046218)	2/9	0.0514622	0.88984	0	0	6.57933	19.5203	KMO;IDO1
protein polyglutamylation (GO:0018095)	2/9	0.0514622	0.88984	0	0	6.57933	19.5203	TTLL11;CEP41
regulation of skeletal muscle cell differentiation (GO:2001014)	2/9	0.0514622	0.88984	0	0	6.57933	19.5203	UQCC2;GPC1
negative regulation of fibrinolysis (GO:0051918)	2/9	0.0514622	0.88984	0	0	6.57933	19.5203	PLG;F2
podosome assembly (GO:0071800)	2/9	0.0514622	0.88984	0	0	6.57933	19.5203	NCF1;SH3PXD2B
membrane disruption in other organism (GO:0051673)	2/9	0.0514622	0.88984	0	0	6.57933	19.5203	DEFA3;DEFA1
antigen processing and presentation of exogenous peptide antigen via MHC class I, TAP-independent (GO:0002480)	2/9	0.0514622	0.88984	0	0	6.57933	19.5203	HFE;HLA-G
negative regulation of T cell activation (GO:0050868)	4/34	0.0517041	0.88984	0	0	3.07406	9.10603	CEACAM1;LILRB1;TNFAIP8L2;HLA-G
positive regulation of cytosolic calcium ion concentration (GO:0007204)	10/133	0.0517061	0.88984	0	0	1.8789	5.56563	JPH4;PTGFR;GPER1;OPRL1;CD36;TACR1;MCHR1;F2RL2;PTGDR;CCR2
antimicrobial humoral immune response mediated by antimicrobial peptide (GO:0061844)	5/49	0.052497	0.88984	0	0	2.62118	7.7246	DEFA3;RNASE3;DEFA1;F2;S100A9
negative regulation of cell adhesion (GO:0007162)	6/65	0.0533365	0.88984	0	0	2.34672	6.87855	ACVRL1;FZD4;ADAM22;CYP1B1;SPOCK1;PLG
fatty acid catabolic process (GO:0009062)	6/65	0.0533365	0.88984	0	0	2.34672	6.87855	PECR;ABCD2;NUDT7;MECR;EHHADH;HSD17B4
negative regulation of NF-kappaB transcription factor activity (GO:0032088)	7/82	0.0548939	0.88984	0	0	2.15457	6.25331	PARP10;NLRP12;AIM2;ANXA4;CARD8;CYP1B1;CMKLR1
dendritic cell differentiation (GO:0097028)	3/21	0.0549429	0.88984	0	0	3.84035	11.1426	TRPM2;FLT3;LILRB1
phospholipid translocation (GO:0045332)	3/21	0.0549429	0.88984	0	0	3.84035	11.1426	ATP8B4;ATP8B1;ATP10D
non-motile cilium assembly (GO:1905515)	3/21	0.0549429	0.88984	0	0	3.84035	11.1426	ARL13B;DISC1;CEP89
fatty acid oxidation (GO:0019395)	5/50	0.056417	0.88984	0	0	2.56279	7.36799	PECR;ABCD2;MECR;EHHADH;HSD17B4
blood circulation (GO:0008015)	5/50	0.056417	0.88984	0	0	2.56279	7.36799	ACVRL1;NFE2;CXCL10;RCAN1;MYOF
receptor internalization (GO:0031623)	5/50	0.056417	0.88984	0	0	2.56279	7.36799	CEACAM1;CXCR1;CXCR2;LILRB1;CD36
regulation of sodium ion transport (GO:0002028)	4/35	0.0565273	0.88984	0	0	2.97474	8.54652	WNK3;ATP2B4;SIK1;SCN5A
regulation of ion transmembrane transport (GO:0034765)	4/35	0.0565273	0.88984	0	0	2.97474	8.54652	KCNH2;KCNE3;KCNJ1;KCNJ2
extracellular matrix organization (GO:0030198)	15/229	0.0569814	0.88984	0	0	1.62199	4.64706	PRSS1;LAMA2;ITGA3;TNC;HTRA1;PLG;MMP8;ADAMTS5;ITGA10;COL5A3;SH3PXD2B;CYP1B1;COL4A5;A2M;PRSS2
intrinsic apoptotic signaling pathway (GO:0097193)	8/101	0.0601766	0.88984	0	0	1.98631	5.58245	ZMAT1;CHEK2;ZMAT4;CYP1B1;CIDEB;BRCA1;KRCC1;IKBKE
regulation of protein localization to plasma membrane (GO:1903076)	6/67	0.0601839	0.88984	0	0	2.26954	6.37821	MRAP;ITGA3;GPER1;WNK3;STAC3;EPHB2
peptidyl-tyrosine modification (GO:0018212)	5/51	0.0605007	0.88984	0	0	2.50695	7.03224	PDGFRB;HCK;CSF1R;FLT3;EPHB2
arachidonic acid metabolic process (GO:0019369)	5/51	0.0605007	0.88984	0	0	2.50695	7.03224	CYP2J2;PLA2G4C;ALOX15;CYP1B1;ALOX15B
regulation of immune response (GO:0050776)	16/251	0.0615437	0.88984	0	0	1.5757	4.39305	HFE;BTN3A3;LILRB1;BTN3A2;LILRA1;CD1C;SAMHD1;HLA-G;PVR;CD1A;OSCAR;NLRP12;FCGR3A;SELL;SLAMF6;SIGLEC7
epithelial cell migration (GO:0010631)	4/36	0.0615834	0.88984	0	0	2.88163	8.03214	DPP4;FERMT1;CYP1B1;FAT2
regulation of natural killer cell mediated cytotoxicity (GO:0042269)	3/22	0.0617152	0.88984	0	0	3.63804	10.1328	LILRB1;SLAMF6;PVR
regulation of calcium ion import (GO:0090279)	3/22	0.0617152	0.88984	0	0	3.63804	10.1328	PDGFRB;FCRL3;WNK3
NAD biosynthetic process (GO:0009435)	3/22	0.0617152	0.88984	0	0	3.63804	10.1328	PARP10;NMNAT3;NUDT12
lipid translocation (GO:0034204)	3/22	0.0617152	0.88984	0	0	3.63804	10.1328	ATP8B4;ATP8B1;ATP10D
regulation of DNA biosynthetic process (GO:2000278)	3/22	0.0617152	0.88984	0	0	3.63804	10.1328	ACVRL1;PDGFRB;HGF
glucose transport (GO:0015758)	3/22	0.0617152	0.88984	0	0	3.63804	10.1328	SLC2A9;SLC5A9;SLC5A4
superoxide anion generation (GO:0042554)	2/10	0.0625884	0.88984	0	0	5.75661	15.9526	NCF1;CYBB
N-acetylneuraminate metabolic process (GO:0006054)	2/10	0.0625884	0.88984	0	0	5.75661	15.9526	NAGK;NPL
tryptophan metabolic process (GO:0006568)	2/10	0.0625884	0.88984	0	0	5.75661	15.9526	KMO;IDO1
T cell chemotaxis (GO:0010818)	2/10	0.0625884	0.88984	0	0	5.75661	15.9526	CXCL10;DEFA1
regulation of granulocyte differentiation (GO:0030852)	2/10	0.0625884	0.88984	0	0	5.75661	15.9526	CEACAM1;C1QC
receptor guanylyl cyclase signaling pathway (GO:0007168)	2/10	0.0625884	0.88984	0	0	5.75661	15.9526	GUCY2C;GUCY2D
negative regulation of cell activation (GO:0050866)	2/10	0.0625884	0.88984	0	0	5.75661	15.9526	GPER1;F2
regulation of natural killer cell mediated cytotoxicity directed against tumor cell target (GO:0002858)	2/10	0.0625884	0.88984	0	0	5.75661	15.9526	CEACAM1;PVR
negative regulation of protein maturation (GO:1903318)	2/10	0.0625884	0.88984	0	0	5.75661	15.9526	LRRK2;USP17L2
negative regulation of intracellular estrogen receptor signaling pathway (GO:0033147)	2/10	0.0625884	0.88984	0	0	5.75661	15.9526	BRCA1;ZNF366
regulation of neuroblast proliferation (GO:1902692)	2/10	0.0625884	0.88984	0	0	5.75661	15.9526	LRRK2;DISC1
positive regulation of adaptive immune response based on somatic recombination of immune receptors built from immunoglobulin superfamily domains (GO:0002824)	2/10	0.0625884	0.88984	0	0	5.75661	15.9526	IL23R;CCR2
regulation of T cell chemotaxis (GO:0010819)	2/10	0.0625884	0.88984	0	0	5.75661	15.9526	CXCL10;CCR2
positive regulation of cell differentiation (GO:0045597)	13/194	0.0631119	0.88984	0	0	1.66086	4.58869	ACVRL1;HGF;LPL;ALOX15B;CEACAM1;GPC1;ASXL2;CD36;TP63;AAMDC;CDON;CMKLR1;BMPR1A
inflammatory response (GO:0006954)	16/252	0.0633044	0.88984	0	0	1.56894	4.32995	PTGFR;CSF1R;ALOX15;PLA2G4C;TNFRSF10C;CYBB;TACR1;NLRC4;HDAC9;CXCL10;MMP25;NLRP12;CXCR2;S100A9;S100A8;PTGDR
regulation of axon extension involved in axon guidance (GO:0048841)	3/23	0.0688548	0.88984	0	0	3.45596	9.2473	SEMA3C;SEMA3D;SEMA3A
neuronal action potential (GO:0019228)	3/23	0.0688548	0.88984	0	0	3.45596	9.2473	GPER1;KCNA2;SCN5A
NAD metabolic process (GO:0019674)	3/23	0.0688548	0.88984	0	0	3.45596	9.2473	NMNAT3;KMO;NUDT12
negative regulation of axon extension (GO:0030517)	3/23	0.0688548	0.88984	0	0	3.45596	9.2473	SEMA3C;SEMA3D;SEMA3A
positive regulation of phosphatidylinositol 3-kinase signaling (GO:0014068)	5/53	0.0691578	0.88984	0	0	2.40224	6.41726	PDGFRB;NCF1;FLT3;GPER1;HGF
action potential (GO:0001508)	5/54	0.0737295	0.88984	0	0	2.35309	6.13534	KCNH2;GPER1;KCNA2;SCN5A;KCNJ2
regulation of histone H3-K9 methylation (GO:0051570)	2/11	0.0744364	0.88984	0	0	5.11672	13.2923	INSL6;BRCA1
negative regulation of leukocyte activation (GO:0002695)	2/11	0.0744364	0.88984	0	0	5.11672	13.2923	GPER1;NR1H3
regulation of myeloid leukocyte mediated immunity (GO:0002886)	2/11	0.0744364	0.88984	0	0	5.11672	13.2923	STYK1;DNASE1
nitric oxide biosynthetic process (GO:0006809)	2/11	0.0744364	0.88984	0	0	5.11672	13.2923	SPR;CYP1B1
regulation of tumor necrosis factor biosynthetic process (GO:0042534)	2/11	0.0744364	0.88984	0	0	5.11672	13.2923	LILRB1;CCR2
cellular response to prostaglandin stimulus (GO:0071379)	2/11	0.0744364	0.88984	0	0	5.11672	13.2923	PTGFR;PTGDR
immune response-regulating cell surface receptor signaling pathway (GO:0002768)	2/11	0.0744364	0.88984	0	0	5.11672	13.2923	LILRB1;HLA-G
negative regulation of fatty acid biosynthetic process (GO:0045717)	2/11	0.0744364	0.88984	0	0	5.11672	13.2923	CEACAM1;BRCA1
lymphocyte mediated immunity (GO:0002449)	2/11	0.0744364	0.88984	0	0	5.11672	13.2923	BTN3A3;BTN3A2
cardiac muscle cell membrane repolarization (GO:0099622)	2/11	0.0744364	0.88984	0	0	5.11672	13.2923	KCNH2;KCNJ2
membrane repolarization during action potential (GO:0086011)	2/11	0.0744364	0.88984	0	0	5.11672	13.2923	KCNH2;KCNJ2
positive regulation of purine nucleotide biosynthetic process (GO:1900373)	3/24	0.0763491	0.88984	0	0	3.29122	8.46645	GPER1;RLN2;TSHR
sensory perception of pain (GO:0019233)	3/24	0.0763491	0.88984	0	0	3.29122	8.46645	TRPA1;KCNA2;OPRL1
mucosal immune response (GO:0002385)	3/24	0.0763491	0.88984	0	0	3.29122	8.46645	DEFA3;DEFA1;RNASE3
positive regulation of vascular endothelial growth factor production (GO:0010575)	3/24	0.0763491	0.88984	0	0	3.29122	8.46645	CXCL17;CYP1B1;BRCA1
inositol lipid-mediated signaling (GO:0048017)	4/39	0.0781208	0.88984	0	0	2.63422	6.71593	PDGFRB;CSF1R;PTAFR;KCNH1
regulation of plasma membrane bounded cell projection assembly (GO:0120032)	4/39	0.0781208	0.88984	0	0	2.63422	6.71593	TRPM2;ATP8B1;PLD1;USP17L2
cellular defense response (GO:0006968)	5/56	0.0833529	0.88984	0	0	2.26058	5.6168	CX3CR1;NCF1;CXCR2;MNDA;HLA-G
ameboidal-type cell migration (GO:0001667)	4/40	0.0840779	0.88984	0	0	2.56091	6.34084	SEMA3C;SEMA3D;SEMA3A;FAT2
negative regulation of cytokine secretion (GO:0050710)	4/40	0.0840779	0.88984	0	0	2.56091	6.34084	NLRP12;ANXA4;FFAR4;LILRB1
neuron migration (GO:0001764)	4/40	0.0840779	0.88984	0	0	2.56091	6.34084	GPM6A;SEMA3A;SPOCK1;DISC1
inorganic cation import across plasma membrane (GO:0098659)	3/25	0.0841846	0.88984	0	0	3.14145	7.77429	TRPM2;HFE;ATP2B4
positive regulation of leukocyte mediated cytotoxicity (GO:0001912)	3/25	0.0841846	0.88984	0	0	3.14145	7.77429	IL23R;SLAMF6;PVR
positive regulation of interleukin-1 beta secretion (GO:0050718)	3/25	0.0841846	0.88984	0	0	3.14145	7.77429	NLRP12;AIM2;CARD8
regulation of vascular smooth muscle cell proliferation (GO:1904705)	3/25	0.0841846	0.88984	0	0	3.14145	7.77429	CNN1;GPER1;BMPR1A
rRNA 3'-end processing (GO:0031125)	2/12	0.0869266	0.88984	0	0	4.60481	11.2481	EXOSC5;ERI2
retinol metabolic process (GO:0042572)	2/12	0.0869266	0.88984	0	0	4.60481	11.2481	ADH4;CYP1B1
sulfation (GO:0051923)	2/12	0.0869266	0.88984	0	0	4.60481	11.2481	SULT1B1;UST
regulation of cholesterol storage (GO:0010885)	2/12	0.0869266	0.88984	0	0	4.60481	11.2481	NR1H3;LPL
positive regulation of T-helper 1 type immune response (GO:0002827)	2/12	0.0869266	0.88984	0	0	4.60481	11.2481	IL23R;CCR2
positive regulation of cardiocyte differentiation (GO:1905209)	2/12	0.0869266	0.88984	0	0	4.60481	11.2481	SEMA3C;GPER1
nitric oxide metabolic process (GO:0046209)	2/12	0.0869266	0.88984	0	0	4.60481	11.2481	SPR;CYP1B1
tRNA 5'-leader removal (GO:0001682)	2/12	0.0869266	0.88984	0	0	4.60481	11.2481	POP5;RPP40
regulation of skeletal muscle tissue development (GO:0048641)	2/12	0.0869266	0.88984	0	0	4.60481	11.2481	UQCC2;HDAC9
regulation of mononuclear cell migration (GO:0071675)	2/12	0.0869266	0.88984	0	0	4.60481	11.2481	CXCL17;CMKLR1
negative regulation of histone modification (GO:0031057)	2/12	0.0869266	0.88984	0	0	4.60481	11.2481	BRCA1;USP17L2
negative regulation of vascular smooth muscle cell proliferation (GO:1904706)	2/12	0.0869266	0.88984	0	0	4.60481	11.2481	CNN1;GPER1
negative regulation of interleukin-1 secretion (GO:0050711)	2/12	0.0869266	0.88984	0	0	4.60481	11.2481	NLRP12;CARD8
negative regulation of interleukin-12 production (GO:0032695)	2/12	0.0869266	0.88984	0	0	4.60481	11.2481	LILRB1;CMKLR1
negative regulation of leukocyte apoptotic process (GO:2000107)	2/12	0.0869266	0.88984	0	0	4.60481	11.2481	LILRB1;MERTK
negative regulation of fatty acid metabolic process (GO:0045922)	2/12	0.0869266	0.88984	0	0	4.60481	11.2481	CEACAM1;BRCA1
positive regulation of granulocyte macrophage colony-stimulating factor production (GO:0032725)	2/12	0.0869266	0.88984	0	0	4.60481	11.2481	DDX58;IL23R
regulation of calcium-mediated signaling (GO:0050848)	4/41	0.0902501	0.88984	0	0	2.49157	5.99264	JPH4;RCAN1;LRRK2;CMKLR1
negative chemotaxis (GO:0050919)	3/26	0.0923471	0.88984	0	0	3.00471	7.15782	SEMA3C;SEMA3D;SEMA3A
antigen processing and presentation of exogenous peptide antigen via MHC class I, TAP-dependent (GO:0002479)	6/75	0.0925399	0.88984	0	0	2.00557	4.77348	NCF1;HFE;CYBB;CD36;HLA-G;FCGR1B
cellular response to calcium ion (GO:0071277)	4/42	0.0966327	0.88984	0	0	2.42587	5.66887	TRPM2;ALOX15;SCN5A;KCNH1
regulation of granulocyte chemotaxis (GO:0071622)	2/13	0.0999852	0.88984	0	0	4.18597	9.63917	CXCL17;CMKLR1
nucleotide-sugar metabolic process (GO:0009225)	2/13	0.0999852	0.88984	0	0	4.18597	9.63917	UGDH;EXTL2
positive regulation of sodium ion transport (GO:0010765)	2/13	0.0999852	0.88984	0	0	4.18597	9.63917	WNK3;SCN5A
atrial cardiac muscle cell action potential (GO:0086014)	2/13	0.0999852	0.88984	0	0	4.18597	9.63917	CACNB2;SCN5A
glucosamine-containing compound metabolic process (GO:1901071)	2/13	0.0999852	0.88984	0	0	4.18597	9.63917	EXTL2;NAGK
positive regulation of T cell mediated cytotoxicity (GO:0001916)	2/13	0.0999852	0.88984	0	0	4.18597	9.63917	IL23R;PVR
regulation of triglyceride biosynthetic process (GO:0010866)	2/13	0.0999852	0.88984	0	0	4.18597	9.63917	NR1H3;SIK1
DNA damage response, signal transduction by p53 class mediator resulting in transcription of p21 class mediator (GO:0006978)	2/13	0.0999852	0.88984	0	0	4.18597	9.63917	BRCA1;TP63
regulation of granulocyte macrophage colony-stimulating factor production (GO:0032645)	2/13	0.0999852	0.88984	0	0	4.18597	9.63917	DDX58;IL23R
membrane repolarization (GO:0086009)	2/13	0.0999852	0.88984	0	0	4.18597	9.63917	KCNH2;KCNJ2
cellular response to low-density lipoprotein particle stimulus (GO:0071404)	2/13	0.0999852	0.88984	0	0	4.18597	9.63917	LPL;CD36
regulation of fibrinolysis (GO:0051917)	2/13	0.0999852	0.88984	0	0	4.18597	9.63917	PLG;F2
positive regulation of interleukin-17 production (GO:0032740)	2/13	0.0999852	0.88984	0	0	4.18597	9.63917	IL23R;SLAMF6
negative regulation of interleukin-10 production (GO:0032693)	2/13	0.0999852	0.88984	0	0	4.18597	9.63917	IL23R;LILRB1
positive regulation of lipid kinase activity (GO:0090218)	3/27	0.100822	0.88984	0	0	2.87936	6.60641	PDGFRB;FLT3;F2
peptidyl-glutamic acid modification (GO:0018200)	3/27	0.100822	0.88984	0	0	2.87936	6.60641	TTLL11;CEP41;F2
regulation of blood vessel diameter (GO:0097746)	3/27	0.100822	0.88984	0	0	2.87936	6.60641	GPER1;UTS2;PTGDR
intrinsic apoptotic signaling pathway by p53 class mediator (GO:0072332)	4/43	0.10322	0.88984	0	0	2.36355	5.36735	ZMAT1;ZMAT4;KRCC1;TP63
regulation of interferon-gamma production (GO:0032649)	4/43	0.10322	0.88984	0	0	2.36355	5.36735	IL23R;SLAMF6;LILRB1;CCR2
cellular response to organic substance (GO:0071310)	9/133	0.104334	0.88984	0	0	1.67525	3.78633	CSF1R;CLEC3B;NLRP12;GNRHR2;FLT3;FFAR4;GNRHR;CYP1B1;SIK1
negative regulation of cell communication (GO:0010648)	6/78	0.106681	0.88984	0	0	1.9217	4.30059	PDGFRB;CSF1R;NLRP12;FLT3;EPHB2;MERTK
antigen processing and presentation of exogenous peptide antigen via MHC class I (GO:0042590)	6/78	0.106681	0.88984	0	0	1.9217	4.30059	NCF1;HFE;CYBB;CD36;HLA-G;FCGR1B
cilium organization (GO:0044782)	12/192	0.10671	0.88984	0	0	1.53982	3.44556	MKKS;DNAI2;ARL13B;ARL6;C21ORF59;DNAH6;DZIP1L;IFT27;IFT80;CEP41;CC2D2A;CEP89
carboxylic acid catabolic process (GO:0046395)	3/28	0.109594	0.88984	0	0	2.76404	6.11123	NAGK;NPL;LYVE1
lytic vacuole organization (GO:0080171)	3/28	0.109594	0.88984	0	0	2.76404	6.11123	HOOK2;LRRK2;ZKSCAN3
cardiac muscle cell action potential involved in contraction (GO:0086002)	3/28	0.109594	0.88984	0	0	2.76404	6.11123	KCNH2;SCN5A;KCNJ2
neural crest cell migration (GO:0001755)	3/28	0.109594	0.88984	0	0	2.76404	6.11123	SEMA3C;SEMA3D;SEMA3A
regulation of fatty acid biosynthetic process (GO:0042304)	3/28	0.109594	0.88984	0	0	2.76404	6.11123	CEACAM1;NR1H3;BRCA1
potassium ion transport (GO:0006813)	5/61	0.110126	0.88984	0	0	2.0582	4.54067	KCNA2;KCNA6;KCNJ1;KCNJ2;KCNH1
positive regulation of leukocyte chemotaxis (GO:0002690)	5/61	0.110126	0.88984	0	0	2.0582	4.54067	CXCL10;CXCL17;MOSPD2;CCR2;CMKLR1
negative regulation of viral life cycle (GO:1903901)	5/61	0.110126	0.88984	0	0	2.0582	4.54067	PARP10;FAM111A;RNASEL;OAS1;TRIM5
striated muscle contraction (GO:0006941)	5/61	0.110126	0.88984	0	0	2.0582	4.54067	KCNH2;DTNA;STAC3;SCN5A;MYOM2
cellular response to interferon-gamma (GO:0071346)	8/116	0.11179	0.88984	0	0	1.70908	3.74483	HCK;OAS1;TRIM5;HFE;PTAFR;HLA-G;FCGR1B;TRIM34
negative regulation of hydrogen peroxide-induced cell death (GO:1903206)	2/14	0.113543	0.88984	0	0	3.83694	8.34754	HGF;LRRK2
regulation of calcineurin-NFAT signaling cascade (GO:0070884)	2/14	0.113543	0.88984	0	0	3.83694	8.34754	RCAN1;ATP2B4
N-acetylglucosamine metabolic process (GO:0006044)	2/14	0.113543	0.88984	0	0	3.83694	8.34754	EXTL2;NAGK
regulation of ventricular cardiac muscle cell membrane repolarization (GO:0060307)	2/14	0.113543	0.88984	0	0	3.83694	8.34754	KCNH2;SCN5A
monosaccharide transport (GO:0015749)	2/14	0.113543	0.88984	0	0	3.83694	8.34754	SLC2A9;SLC5A9
neutrophil activation (GO:0042119)	2/14	0.113543	0.88984	0	0	3.83694	8.34754	CXCR2;DNASE1
DNA damage response, signal transduction resulting in transcription (GO:0042772)	2/14	0.113543	0.88984	0	0	3.83694	8.34754	BRCA1;TP63
negative regulation of endoplasmic reticulum stress-induced intrinsic apoptotic signaling pathway (GO:1902236)	2/14	0.113543	0.88984	0	0	3.83694	8.34754	LRRK2;HSPA1A
adaptive immune response based on somatic recombination of immune receptors built from immunoglobulin superfamily domains (GO:0002460)	2/14	0.113543	0.88984	0	0	3.83694	8.34754	BTN3A3;BTN3A2
estrogen metabolic process (GO:0008210)	2/14	0.113543	0.88984	0	0	3.83694	8.34754	HSD17B4;CYP1B1
positive regulation of smooth muscle contraction (GO:0045987)	2/14	0.113543	0.88984	0	0	3.83694	8.34754	GPER1;TACR1
positive regulation of blood vessel diameter (GO:0097755)	2/14	0.113543	0.88984	0	0	3.83694	8.34754	GPER1;PTGDR
diterpenoid metabolic process (GO:0016101)	5/62	0.115927	0.88984	0	0	2.02199	4.35698	PECR;ADH4;GPC1;NAPEPLD;LPL
regulation of phosphatidylinositol 3-kinase signaling (GO:0014066)	6/80	0.116693	0.88984	0	0	1.86957	4.01621	PDGFRB;CEACAM1;NCF1;FLT3;GPER1;HGF
negative regulation of defense response (GO:0031348)	6/80	0.116693	0.88984	0	0	1.86957	4.01621	NLRP12;GPER1;CXCL17;FFAR4;NR1H3;TNFAIP8L2
nicotinamide nucleotide metabolic process (GO:0046496)	4/45	0.116989	0.88984	0	0	2.24802	4.82352	HK3;HKDC1;NMNAT3;KMO
dicarboxylic acid transport (GO:0006835)	3/29	0.118648	0.88984	0	0	2.6576	5.66492	SLC26A8;SLC1A3;SLC1A7
superoxide metabolic process (GO:0006801)	3/29	0.118648	0.88984	0	0	2.6576	5.66492	NCF1;SH3PXD2B;CYBB
determination of bilateral symmetry (GO:0009855)	3/29	0.118648	0.88984	0	0	2.6576	5.66492	MKKS;DNAI2;ARL6
cardiac muscle cell action potential (GO:0086001)	3/29	0.118648	0.88984	0	0	2.6576	5.66492	KCNH2;SCN5A;KCNJ2
positive regulation of interleukin-1 secretion (GO:0050716)	3/29	0.118648	0.88984	0	0	2.6576	5.66492	NLRP12;AIM2;CARD8
negative regulation of lymphocyte proliferation (GO:0050672)	3/29	0.118648	0.88984	0	0	2.6576	5.66492	LILRB1;MNDA;HLA-G
coenzyme biosynthetic process (GO:0009108)	3/29	0.118648	0.88984	0	0	2.6576	5.66492	SPR;PNPO;MOCS1
semaphorin-plexin signaling pathway (GO:0071526)	3/29	0.118648	0.88984	0	0	2.6576	5.66492	SEMA3C;SEMA3D;SEMA3A
respiratory system development (GO:0060541)	3/29	0.118648	0.88984	0	0	2.6576	5.66492	ITGA3;NKX2-1;DISP1
negative regulation of autophagy (GO:0010507)	4/46	0.124157	0.88984	0	0	2.19438	4.57793	LARS;LRRK2;HGF;ZKSCAN3
cellular response to metal ion (GO:0071248)	7/100	0.124163	0.88984	0	0	1.73592	3.62139	TRPM2;NCF1;HFE;LRRK2;ALOX15;SCN5A;KCNH1
positive regulation of alpha-beta T cell activation (GO:0046635)	2/15	0.127536	0.88984	0	0	3.54161	7.29343	IL23R;CCR2
NAD biosynthesis via nicotinamide riboside salvage pathway (GO:0034356)	2/15	0.127536	0.88984	0	0	3.54161	7.29343	PARP10;NUDT12
membrane repolarization during cardiac muscle cell action potential (GO:0086013)	2/15	0.127536	0.88984	0	0	3.54161	7.29343	KCNH2;KCNJ2
fatty acid beta-oxidation using acyl-CoA oxidase (GO:0033540)	2/15	0.127536	0.88984	0	0	3.54161	7.29343	EHHADH;HSD17B4
selective autophagy (GO:0061912)	2/15	0.127536	0.88984	0	0	3.54161	7.29343	STBD1;WDFY3
epithelial cilium movement (GO:0003351)	2/15	0.127536	0.88984	0	0	3.54161	7.29343	SPAG17;SPA17
endocardial cushion morphogenesis (GO:0003203)	2/15	0.127536	0.88984	0	0	3.54161	7.29343	ACVRL1;BMPR1A
response to X-ray (GO:0010165)	2/15	0.127536	0.88984	0	0	3.54161	7.29343	XRCC4;TP63
lipoxygenase pathway (GO:0019372)	2/15	0.127536	0.88984	0	0	3.54161	7.29343	ALOX15;ALOX15B
ventricular cardiac muscle cell action potential (GO:0086005)	2/15	0.127536	0.88984	0	0	3.54161	7.29343	KCNH2;SCN5A
unsaturated fatty acid biosynthetic process (GO:0006636)	2/15	0.127536	0.88984	0	0	3.54161	7.29343	ALOX15;ALOX15B
mesenchyme morphogenesis (GO:0072132)	2/15	0.127536	0.88984	0	0	3.54161	7.29343	ACVRL1;BMPR1A
vasculature development (GO:0001944)	2/15	0.127536	0.88984	0	0	3.54161	7.29343	ACVRL1;PDGFRB
regulation of macrophage chemotaxis (GO:0010758)	2/15	0.127536	0.88984	0	0	3.54161	7.29343	CXCL17;CMKLR1
amide transport (GO:0042886)	2/15	0.127536	0.88984	0	0	3.54161	7.29343	SLC14A1;DISP1
negative regulation of platelet activation (GO:0010544)	2/15	0.127536	0.88984	0	0	3.54161	7.29343	CEACAM1;F2
negative regulation of cytokine production involved in immune response (GO:0002719)	2/15	0.127536	0.88984	0	0	3.54161	7.29343	HFE;LILRB1
negative regulation of protein processing (GO:0010955)	2/15	0.127536	0.88984	0	0	3.54161	7.29343	LRRK2;USP17L2
sulfate transport (GO:0008272)	2/15	0.127536	0.88984	0	0	3.54161	7.29343	SLC13A4;SLC26A8
regulation of peptide secretion (GO:0002791)	2/15	0.127536	0.88984	0	0	3.54161	7.29343	ARFIP1;DISP1
inhibition of cysteine-type endopeptidase activity (GO:0097340)	2/15	0.127536	0.88984	0	0	3.54161	7.29343	CARD8;NLRC4
homophilic cell adhesion via plasma membrane adhesion molecules (GO:0007156)	5/64	0.127952	0.88984	0	0	1.95324	4.01606	CEACAM1;CDH12;FAT2;PVR;MPZL2
positive regulation of JAK-STAT cascade (GO:0046427)	5/64	0.127952	0.88984	0	0	1.95324	4.01606	CSF1R;FLT3;IL23R;CYP1B1;F2
regulation of actin cytoskeleton reorganization (GO:2000249)	3/30	0.127967	0.88984	0	0	2.55903	5.26132	CSF1R;TRPM2;HCK
bile acid and bile salt transport (GO:0015721)	3/30	0.127967	0.88984	0	0	2.55903	5.26132	CEACAM1;ATP8B1;SLCO2B1
enzyme linked receptor protein signaling pathway (GO:0007167)	8/120	0.128666	0.88984	0	0	1.6477	3.37867	GUCY2C;CSF1R;HCK;GUCY2D;FLT3;STYK1;BMX;GFRA2
positive regulation of cytokine production (GO:0001819)	13/220	0.131379	0.88984	0	0	1.45026	2.94355	POLR3GL;DDX58;IL23R;CXCL17;BRCA1;USP17L2;HLA-G;CLEC6A;CYP1B1;SLAMF6;TLR5;CCR2;HSPA1A
myofibril assembly (GO:0030239)	4/47	0.131507	0.88984	0	0	2.14323	4.34797	TMOD1;PDGFRB;TMOD2;MYOM2
negative regulation of cellular biosynthetic process (GO:0031327)	4/47	0.131507	0.88984	0	0	2.14323	4.34797	CEACAM1;ATP2B4;SIK1;BRCA1
negative regulation of signaling (GO:0023057)	6/83	0.132554	0.88984	0	0	1.79644	3.63019	PDGFRB;CSF1R;NLRP12;FLT3;EPHB2;MERTK
establishment of protein localization to membrane (GO:0090150)	6/83	0.132554	0.88984	0	0	1.79644	3.63019	ARFRP1;NCF1;ARL6;GOLPH3L;ATG4C;CHM
cellular response to type I interferon (GO:0071357)	5/65	0.13417	0.88984	0	0	1.92059	3.85778	RNASEL;OAS1;HFE;SAMHD1;HLA-G
type I interferon signaling pathway (GO:0060337)	5/65	0.13417	0.88984	0	0	1.92059	3.85778	RNASEL;OAS1;HFE;SAMHD1;HLA-G
positive regulation of release of sequestered calcium ion into cytosol (GO:0051281)	3/31	0.137537	0.88984	0	0	2.46751	4.89519	CXCL10;GPER1;F2
positive regulation of interleukin-1 beta production (GO:0032731)	3/31	0.137537	0.88984	0	0	2.46751	4.89519	NLRP12;AIM2;CARD8
lysosome organization (GO:0007040)	3/31	0.137537	0.88984	0	0	2.46751	4.89519	HOOK2;LRRK2;ZKSCAN3
regulation of cytokine secretion (GO:0050707)	3/31	0.137537	0.88984	0	0	2.46751	4.89519	NLRP12;CLEC6A;FFAR4
fibrinolysis (GO:0042730)	2/16	0.141904	0.88984	0	0	3.28846	6.42106	PLG;F2
establishment of skin barrier (GO:0061436)	2/16	0.141904	0.88984	0	0	3.28846	6.42106	TMEM79;TP63
regulation of membrane depolarization (GO:0003254)	2/16	0.141904	0.88984	0	0	3.28846	6.42106	LRRK2;SCN5A
regulation of water loss via skin (GO:0033561)	2/16	0.141904	0.88984	0	0	3.28846	6.42106	TMEM79;TP63
hexose transport (GO:0008645)	2/16	0.141904	0.88984	0	0	3.28846	6.42106	SLC2A9;SLC5A9
T cell migration (GO:0072678)	2/16	0.141904	0.88984	0	0	3.28846	6.42106	CXCL10;DEFA1
inner dynein arm assembly (GO:0036159)	2/16	0.141904	0.88984	0	0	3.28846	6.42106	DNAH7;MSS51
regulation of reactive oxygen species metabolic process (GO:2000377)	4/49	0.146723	0.88984	0	0	2.04776	3.93009	PDGFRB;CYP1B1;BRCA1;F2
cilium movement (GO:0003341)	4/49	0.146723	0.88984	0	0	2.04776	3.93009	SPAG17;DNAI2;DNAH7;SPA17
regulation of release of sequestered calcium ion into cytosol (GO:0051279)	4/49	0.146723	0.88984	0	0	2.04776	3.93009	JPH4;CXCL10;GPER1;F2
positive regulation of calcium ion transport into cytosol (GO:0010524)	3/32	0.147341	0.88984	0	0	2.3823	4.56211	CXCL10;GPER1;F2
oxoacid metabolic process (GO:0043436)	3/32	0.147341	0.88984	0	0	2.3823	4.56211	SULT1B1;MARC2;MARC1
protein trimerization (GO:0070206)	3/32	0.147341	0.88984	0	0	2.3823	4.56211	SIGMAR1;DISP1;TRIM34
cilium assembly (GO:0060271)	16/288	0.15003	0.88984	0	0	1.35869	2.57733	MKKS;DNAI2;ARL6;C21ORF59;DNAH6;IFT80;RPGRIP1L;MSS51;ARL13B;DZIP1L;IFT27;CEP41;DISC1;CC2D2A;NINL;CEP89
negative regulation of viral genome replication (GO:0045071)	4/50	0.154575	0.88984	0	0	2.00314	3.74001	PARP10;FAM111A;RNASEL;OAS1
fatty acid beta-oxidation (GO:0006635)	4/50	0.154575	0.88984	0	0	2.00314	3.74001	ABCD2;MECR;EHHADH;HSD17B4
cardiac myofibril assembly (GO:0055003)	2/17	0.156593	0.88984	0	0	3.06907	5.69039	PDGFRB;MYOM2
regulation of tissue remodeling (GO:0034103)	2/17	0.156593	0.88984	0	0	3.06907	5.69039	CEACAM1;THBS4
negative regulation of antigen receptor-mediated signaling pathway (GO:0050858)	2/17	0.156593	0.88984	0	0	3.06907	5.69039	CEACAM1;FCRL3
DNA catabolic process (GO:0006308)	2/17	0.156593	0.88984	0	0	3.06907	5.69039	ERI2;DNASE1
2-oxoglutarate metabolic process (GO:0006103)	2/17	0.156593	0.88984	0	0	3.06907	5.69039	IDH1;OGDH
cardiac muscle cell contraction (GO:0086003)	2/17	0.156593	0.88984	0	0	3.06907	5.69039	SCN5A;KCNJ2
positive regulation of response to biotic stimulus (GO:0002833)	2/17	0.156593	0.88984	0	0	3.06907	5.69039	USP17L2;SASH1
pigment granule transport (GO:0051904)	2/17	0.156593	0.88984	0	0	3.06907	5.69039	MKKS;ARL6
positive regulation of natural killer cell mediated cytotoxicity (GO:0045954)	2/17	0.156593	0.88984	0	0	3.06907	5.69039	SLAMF6;PVR
long-term memory (GO:0007616)	2/17	0.156593	0.88984	0	0	3.06907	5.69039	CALB1;RGS14
regulation of T cell migration (GO:2000404)	2/17	0.156593	0.88984	0	0	3.06907	5.69039	CXCL10;AIRE
regulation of B cell receptor signaling pathway (GO:0050855)	2/17	0.156593	0.88984	0	0	3.06907	5.69039	FCRL3;GCSAM
melanosome transport (GO:0032402)	2/17	0.156593	0.88984	0	0	3.06907	5.69039	MKKS;ARL6
platelet-derived growth factor receptor signaling pathway (GO:0048008)	2/17	0.156593	0.88984	0	0	3.06907	5.69039	PDGFRB;RGS14
positive regulation of natural killer cell mediated immunity (GO:0002717)	2/17	0.156593	0.88984	0	0	3.06907	5.69039	SLAMF6;PVR
axonemal dynein complex assembly (GO:0070286)	3/33	0.157364	0.88984	0	0	2.30277	4.25826	DNAI2;DNAH7;MSS51
negative regulation of mitochondrion organization (GO:0010823)	3/33	0.157364	0.88984	0	0	2.30277	4.25826	LRRK2;HGF;HSPA1A
positive regulation of calcium ion transport (GO:0051928)	3/33	0.157364	0.88984	0	0	2.30277	4.25826	PDGFRB;CACNB2;WNK3
carboxylic acid metabolic process (GO:0019752)	3/33	0.157364	0.88984	0	0	2.30277	4.25826	CYP2J2;CYP4F3;CYP4F22
cellular glucose homeostasis (GO:0001678)	3/33	0.157364	0.88984	0	0	2.30277	4.25826	HK3;GPER1;HKDC1
regulation of interleukin-12 production (GO:0032655)	3/33	0.157364	0.88984	0	0	2.30277	4.25826	IL23R;HLA-G;CMKLR1
proteolysis (GO:0006508)	16/291	0.159301	0.88984	0	0	1.34366	2.46825	PCSK1;PRSS1;GZMA;HTRA1;PLG;PGA3;F2;MMP8;PGA5;PRSS21;TMPRSS11D;DPP4;NLN;MMP25;ATG4C;PRSS2
negative regulation of response to external stimulus (GO:0032102)	7/107	0.159366	0.88984	0	0	1.61381	2.96384	NLRP12;GPER1;CARD8;CXCL17;FFAR4;NR1H3;TNFAIP8L2
negative regulation of response to stimulus (GO:0048585)	8/127	0.161132	0.88984	0	0	1.55021	2.82995	PDGFRB;CSF1R;NLRP12;FLT3;ZKSCAN3;EPHB2;MERTK;HLA-G
regulation of interleukin-8 production (GO:0032677)	3/34	0.167589	0.88984	0	0	2.22837	3.9804	DDX58;TLR5;HSPA1A
ncRNA metabolic process (GO:0034660)	3/34	0.167589	0.88984	0	0	2.22837	3.9804	TDRKH;TDRD9;TDRD12
positive regulation of cell development (GO:0010720)	3/34	0.167589	0.88984	0	0	2.22837	3.9804	RGS14;SEMA3C;GPER1
positive regulation of chemokine production (GO:0032722)	3/34	0.167589	0.88984	0	0	2.22837	3.9804	CSF1R;LPL;ALOX15B
regulation of interleukin-1 beta secretion (GO:0050706)	3/34	0.167589	0.88984	0	0	2.22837	3.9804	NLRP12;AIM2;CARD8
positive regulation of cysteine-type endopeptidase activity involved in apoptotic process (GO:0043280)	7/109	0.170179	0.88984	0	0	1.582	2.80157	NLRP12;CASP5;GPER1;CARD8;NLRC4;S100A9;S100A8
positive regulation of ossification (GO:0045778)	4/52	0.170735	0.88984	0	0	1.91948	3.39295	KL;HGF;TP63;BMPR1A
regulation of calcium ion transport (GO:0051924)	4/52	0.170735	0.88984	0	0	1.91948	3.39295	CACNB2;FCRL3;WNK3;LILRB1
establishment of melanosome localization (GO:0032401)	2/18	0.171549	0.88984	0	0	2.8771	5.07201	MKKS;ARL6
actin filament polymerization (GO:0030041)	2/18	0.171549	0.88984	0	0	2.8771	5.07201	MSRB2;MSRB1
anion transmembrane transport (GO:0098656)	2/18	0.171549	0.88984	0	0	2.8771	5.07201	SLC13A3;SLC13A4
calcium-mediated signaling using intracellular calcium source (GO:0035584)	2/18	0.171549	0.88984	0	0	2.8771	5.07201	PTGFR;TRPM2
outer dynein arm assembly (GO:0036158)	2/18	0.171549	0.88984	0	0	2.8771	5.07201	DNAI2;MSS51
regulation of cardiac muscle cell membrane repolarization (GO:0099623)	2/18	0.171549	0.88984	0	0	2.8771	5.07201	KCNH2;SCN5A
positive regulation of p38MAPK cascade (GO:1900745)	2/18	0.171549	0.88984	0	0	2.8771	5.07201	NCF1;SASH1
regulation of cellular response to growth factor stimulus (GO:0090287)	2/18	0.171549	0.88984	0	0	2.8771	5.07201	ITGA3;LRIT3
regulation of epithelial cell differentiation (GO:0030856)	2/18	0.171549	0.88984	0	0	2.8771	5.07201	CEACAM1;ALOX15B
regulation of smooth muscle cell migration (GO:0014910)	2/18	0.171549	0.88984	0	0	2.8771	5.07201	PDGFRB;BMPR1A
snRNA metabolic process (GO:0016073)	2/18	0.171549	0.88984	0	0	2.8771	5.07201	INTS3;INTS7
defense response to Gram-negative bacterium (GO:0050829)	5/71	0.174122	0.88984	0	0	1.74544	3.05102	IL23R;DEFA3;RNASE3;DEFA1;F2
regulation of signal transduction (GO:0009966)	13/233	0.176728	0.88984	0	0	1.36363	2.36336	PDGFRB;CSF1R;FLT3;ITGA3;ALOX15;NLRC4;MERTK;NLRP12;TRIM5;LRIT3;CD36;EPHB2;SASH1
antibacterial humoral response (GO:0019731)	3/35	0.178001	0.88984	0	0	2.15862	3.7257	DEFA3;DEFA1;RNASE3
negative regulation of cell-substrate adhesion (GO:0010812)	3/35	0.178001	0.88984	0	0	2.15862	3.7257	FZD4;SPOCK1;PLG
neural crest cell development (GO:0014032)	3/35	0.178001	0.88984	0	0	2.15862	3.7257	SEMA3C;SEMA3D;SEMA3A
positive regulation of osteoblast differentiation (GO:0045669)	3/35	0.178001	0.88984	0	0	2.15862	3.7257	HGF;TP63;BMPR1A
cellular response to lipopolysaccharide (GO:0071222)	6/91	0.179394	0.88984	0	0	1.62668	2.79492	HCK;CXCL10;DEFA3;NR1H3;LILRB1;DEFA1
regulation of protein kinase A signaling (GO:0010738)	2/19	0.186726	0.88984	0	0	2.70772	4.54387	LRRK2;AKAP3
regulation of long-term synaptic potentiation (GO:1900271)	2/19	0.186726	0.88984	0	0	2.70772	4.54387	CALB1;EPHB2
sulfur compound transport (GO:0072348)	2/19	0.186726	0.88984	0	0	2.70772	4.54387	SLC13A4;SLC26A8
regulation of myotube differentiation (GO:0010830)	2/19	0.186726	0.88984	0	0	2.70772	4.54387	SIK1;HDAC9
cyclic nucleotide biosynthetic process (GO:0009190)	2/19	0.186726	0.88984	0	0	2.70772	4.54387	GUCY2C;GUCY2D
endocardial cushion development (GO:0003197)	2/19	0.186726	0.88984	0	0	2.70772	4.54387	ACVRL1;BMPR1A
positive regulation of toll-like receptor signaling pathway (GO:0034123)	2/19	0.186726	0.88984	0	0	2.70772	4.54387	NR1H3;TLR5
negative regulation of lipid metabolic process (GO:0045833)	2/19	0.186726	0.88984	0	0	2.70772	4.54387	CEACAM1;GPER1
positive regulation of lipid storage (GO:0010884)	2/19	0.186726	0.88984	0	0	2.70772	4.54387	LPL;IKBKE
leukotriene metabolic process (GO:0006691)	2/19	0.186726	0.88984	0	0	2.70772	4.54387	CYP4F3;ALOX15
intracellular estrogen receptor signaling pathway (GO:0030520)	2/19	0.186726	0.88984	0	0	2.70772	4.54387	DEFA3;DEFA1
purine ribonucleotide catabolic process (GO:0009154)	2/19	0.186726	0.88984	0	0	2.70772	4.54387	NUDT7;NUDT18
nucleotide-sugar biosynthetic process (GO:0009226)	2/19	0.186726	0.88984	0	0	2.70772	4.54387	UGDH;NAGK
positive regulation of blood coagulation (GO:0030194)	2/19	0.186726	0.88984	0	0	2.70772	4.54387	PLG;F2
sensory perception (GO:0007600)	4/54	0.18745	0.88984	0	0	1.84251	3.0848	TRPA1;KCNA2;OPRL1;TMEM150C
positive regulation of inflammatory response (GO:0050729)	5/73	0.188352	0.88984	0	0	1.69393	2.82791	NLRP12;LPL;S100A9;S100A8;CCR2
positive regulation of cytokine secretion (GO:0050715)	5/73	0.188352	0.88984	0	0	1.69393	2.82791	CSF1R;DDX58;CLEC6A;LPL;ALOX15B
actin polymerization or depolymerization (GO:0008154)	3/36	0.188585	0.88984	0	0	2.0931	3.49172	MSRB2;MICAL2;MSRB1
organic hydroxy compound transport (GO:0015850)	3/36	0.188585	0.88984	0	0	2.0931	3.49172	CEACAM1;ATP8B1;SLCO2B1
cardiac muscle tissue development (GO:0048738)	3/36	0.188585	0.88984	0	0	2.0931	3.49172	SIK1;MYOM2;BMPR1A
spermatid development (GO:0007286)	3/36	0.188585	0.88984	0	0	2.0931	3.49172	MKKS;KLHL32;IQCG
regulation of cysteine-type endopeptidase activity involved in apoptotic process (GO:0043281)	6/93	0.192032	0.88984	0	0	1.58912	2.6222	NLRP12;GPER1;HGF;CARD8;TNFRSF10C;DHCR24
positive regulation of defense response (GO:0031349)	5/74	0.19562	0.88984	0	0	1.66929	2.72358	NLRP12;LPL;S100A9;S100A8;CCR2
positive regulation of cysteine-type endopeptidase activity (GO:2001056)	4/55	0.195999	0.88984	0	0	1.80628	2.94361	AIM2;GPER1;CARD8;CIDEB
protein autophosphorylation (GO:0046777)	10/175	0.196037	0.88984	0	0	1.39754	2.27723	PDGFRB;CSF1R;HCK;FLT3;CHEK2;LRRK2;WNK3;STYK1;SIK1;BMX
positive regulation of receptor activity (GO:2000273)	3/37	0.199324	0.88984	0	0	2.03143	3.27633	NCF1;HFE;EPHB2
organic cyclic compound biosynthetic process (GO:1901362)	3/37	0.199324	0.88984	0	0	2.03143	3.27633	GUCY2C;MOCS1;CYP17A1
regulation of endoplasmic reticulum stress-induced intrinsic apoptotic signaling pathway (GO:1902235)	2/20	0.202079	0.88984	0	0	2.55716	4.08915	LRRK2;HSPA1A
negative regulation of intracellular protein transport (GO:0090317)	2/20	0.202079	0.88984	0	0	2.55716	4.08915	LRRK2;USP17L2
wound healing, spreading of cells (GO:0044319)	2/20	0.202079	0.88984	0	0	2.55716	4.08915	ACVRL1;CEACAM1
regulation of lipoprotein lipase activity (GO:0051004)	2/20	0.202079	0.88984	0	0	2.55716	4.08915	NR1H3;LPL
phosphatidylethanolamine metabolic process (GO:0046337)	2/20	0.202079	0.88984	0	0	2.55716	4.08915	ALOX15;NAPEPLD
neuromuscular junction development (GO:0007528)	2/20	0.202079	0.88984	0	0	2.55716	4.08915	CACNB2;LRRK2
striated muscle cell development (GO:0055002)	2/20	0.202079	0.88984	0	0	2.55716	4.08915	TMOD1;TMOD2
positive regulation of T cell migration (GO:2000406)	2/20	0.202079	0.88984	0	0	2.55716	4.08915	CXCL10;CCR2
melanosome localization (GO:0032400)	2/20	0.202079	0.88984	0	0	2.55716	4.08915	MKKS;ARL6
heparan sulfate proteoglycan metabolic process (GO:0030201)	2/20	0.202079	0.88984	0	0	2.55716	4.08915	GLCE;GPC1
regulation of fibroblast growth factor receptor signaling pathway (GO:0040036)	2/20	0.202079	0.88984	0	0	2.55716	4.08915	GPC1;LRIT3
retinoid metabolic process (GO:0001523)	5/75	0.202982	0.88984	0	0	1.64536	2.62374	ADH4;GPC1;NAPEPLD;CYP1B1;LPL
regulation of secretion by cell (GO:1903530)	4/56	0.204664	0.88984	0	0	1.77146	2.81021	RAB40B;ARFIP1;RAB40AL;DISP1
anion transport (GO:0006820)	4/56	0.204664	0.88984	0	0	1.77146	2.81021	SLC22A3;SLC13A3;SLC13A4;SLC26A8
phosphatidylinositol-mediated signaling (GO:0048015)	4/56	0.204664	0.88984	0	0	1.77146	2.81021	PDGFRB;CSF1R;PTAFR;KCNH1
positive regulation of protein localization to membrane (GO:1905477)	6/95	0.204996	0.88984	0	0	1.55325	2.46153	ITGA3;GPER1;WNK3;STAC3;EPHB2;TP63
membrane depolarization during action potential (GO:0086010)	3/38	0.210205	0.88984	0	0	1.97329	3.07768	KCNH2;SCN5A;KCNJ2
muscle contraction (GO:0006936)	8/137	0.213303	0.88984	0	0	1.42928	2.2083	TMOD1;CKMT2;DTNA;TMOD2;MYOF;DYSF;UTS2;MYOM2
protein homotetramerization (GO:0051289)	4/57	0.213438	0.88984	0	0	1.73794	2.68409	TRPA1;SAMHD1;TP63;KCNJ2
hyaluronan metabolic process (GO:0030212)	2/21	0.217567	0.88984	0	0	2.42244	3.69483	ABCC5;LYVE1
epoxygenase P450 pathway (GO:0019373)	2/21	0.217567	0.88984	0	0	2.42244	3.69483	CYP2J2;CYP1B1
GTP metabolic process (GO:0046039)	2/21	0.217567	0.88984	0	0	2.42244	3.69483	LRRK2;MOCS1
regulation of interleukin-17 production (GO:0032660)	2/21	0.217567	0.88984	0	0	2.42244	3.69483	IL23R;SLAMF6
mesoderm development (GO:0007498)	2/21	0.217567	0.88984	0	0	2.42244	3.69483	HCK;BMX
negative regulation of cytokine biosynthetic process (GO:0042036)	2/21	0.217567	0.88984	0	0	2.42244	3.69483	NLRP12;LILRB1
meiosis I (GO:0007127)	2/21	0.217567	0.88984	0	0	2.42244	3.69483	TDRD9;SCIMP
response to ionizing radiation (GO:0010212)	5/77	0.217977	0.88984	0	0	1.59948	2.4366	XRCC4;INTS3;INTS7;BRCA1;TP63
signal transduction by p53 class mediator (GO:0072331)	3/39	0.221212	0.88984	0	0	1.91837	2.89412	ZMAT1;ZMAT4;KRCC1
positive regulation of peptide hormone secretion (GO:0090277)	3/39	0.221212	0.88984	0	0	1.91837	2.89412	HFE;GPER1;MYRIP
positive regulation of fat cell differentiation (GO:0045600)	3/39	0.221212	0.88984	0	0	1.91837	2.89412	ASXL2;AAMDC;CMKLR1
positive regulation of reactive oxygen species metabolic process (GO:2000379)	3/39	0.221212	0.88984	0	0	1.91837	2.89412	PDGFRB;CD36;F2
alpha-amino acid catabolic process (GO:1901606)	3/39	0.221212	0.88984	0	0	1.91837	2.89412	AMDHD1;KMO;IDO1
receptor metabolic process (GO:0043112)	4/58	0.222315	0.88984	0	0	1.70567	2.56475	CXCR1;CXCR2;LILRB1;CD36
sodium ion transport (GO:0006814)	4/58	0.222315	0.88984	0	0	1.70567	2.56475	SLC5A9;SCN5A;SLC4A4;SLC5A4
quaternary ammonium group transport (GO:0015697)	1/6	0.225547	0.88984	0	0	4.60048	6.85116	SLC22A3
pyrimidine-containing compound biosynthetic process (GO:0072528)	1/6	0.225547	0.88984	0	0	4.60048	6.85116	DHODH
protein sulfation (GO:0006477)	1/6	0.225547	0.88984	0	0	4.60048	6.85116	UST
negative regulation of cholesterol storage (GO:0010887)	1/6	0.225547	0.88984	0	0	4.60048	6.85116	NR1H3
positive regulation of cellular extravasation (GO:0002693)	1/6	0.225547	0.88984	0	0	4.60048	6.85116	CCR2
succinyl-CoA metabolic process (GO:0006104)	1/6	0.225547	0.88984	0	0	4.60048	6.85116	OGDH
dopamine catabolic process (GO:0042420)	1/6	0.225547	0.88984	0	0	4.60048	6.85116	MAOB
positive regulation of T-helper 17 type immune response (GO:2000318)	1/6	0.225547	0.88984	0	0	4.60048	6.85116	IL23R
cellular response to iron ion (GO:0071281)	1/6	0.225547	0.88984	0	0	4.60048	6.85116	HFE
lipoxin biosynthetic process (GO:2001301)	1/6	0.225547	0.88984	0	0	4.60048	6.85116	ALOX15
monoterpenoid metabolic process (GO:0016098)	1/6	0.225547	0.88984	0	0	4.60048	6.85116	CYP3A4
T-helper 17 cell lineage commitment (GO:0072540)	1/6	0.225547	0.88984	0	0	4.60048	6.85116	SLAMF6
catecholamine transport (GO:0051937)	1/6	0.225547	0.88984	0	0	4.60048	6.85116	SLC22A3
regulation of phagocytosis, engulfment (GO:0060099)	1/6	0.225547	0.88984	0	0	4.60048	6.85116	ALOX15
regulation of T cell tolerance induction (GO:0002664)	1/6	0.225547	0.88984	0	0	4.60048	6.85116	HLA-G
regulation of nuclease activity (GO:0032069)	1/6	0.225547	0.88984	0	0	4.60048	6.85116	OAS1
chromatin silencing at telomere (GO:0006348)	1/6	0.225547	0.88984	0	0	4.60048	6.85116	INSL6
positive regulation of receptor binding (GO:1900122)	1/6	0.225547	0.88984	0	0	4.60048	6.85116	HFE
negative regulation of lymphocyte migration (GO:2000402)	1/6	0.225547	0.88984	0	0	4.60048	6.85116	GCSAM
negative regulation of protein targeting to membrane (GO:0090315)	1/6	0.225547	0.88984	0	0	4.60048	6.85116	USP17L2
regulation of MHC class I biosynthetic process (GO:0045343)	1/6	0.225547	0.88984	0	0	4.60048	6.85116	NLRP12
phagosome-lysosome fusion (GO:0090385)	1/6	0.225547	0.88984	0	0	4.60048	6.85116	RAB39A
iron ion import (GO:0097286)	1/6	0.225547	0.88984	0	0	4.60048	6.85116	HFE
regulation of skeletal muscle contraction (GO:0014819)	1/6	0.225547	0.88984	0	0	4.60048	6.85116	KCNJ2
negative regulation of digestive system process (GO:0060457)	1/6	0.225547	0.88984	0	0	4.60048	6.85116	NR1H3
positive regulation of memory T cell differentiation (GO:0043382)	1/6	0.225547	0.88984	0	0	4.60048	6.85116	IL23R
negative regulation of interferon-gamma-mediated signaling pathway (GO:0060336)	1/6	0.225547	0.88984	0	0	4.60048	6.85116	NR1H3
negative regulation of response to interferon-gamma (GO:0060331)	1/6	0.225547	0.88984	0	0	4.60048	6.85116	NR1H3
positive regulation of flagellated sperm motility (GO:1902093)	1/6	0.225547	0.88984	0	0	4.60048	6.85116	TACR1
regulation of atrial cardiac muscle cell membrane depolarization (GO:0060371)	1/6	0.225547	0.88984	0	0	4.60048	6.85116	SCN5A
negative regulation of complement activation (GO:0045916)	1/6	0.225547	0.88984	0	0	4.60048	6.85116	A2M
negative regulation of cell size (GO:0045792)	1/6	0.225547	0.88984	0	0	4.60048	6.85116	DEPTOR
blood vessel endothelial cell proliferation involved in sprouting angiogenesis (GO:0002043)	1/6	0.225547	0.88984	0	0	4.60048	6.85116	ACVRL1
regulation of NK T cell activation (GO:0051133)	1/6	0.225547	0.88984	0	0	4.60048	6.85116	IL23R
regulation of blood vessel remodeling (GO:0060312)	1/6	0.225547	0.88984	0	0	4.60048	6.85116	CEACAM1
lens fiber cell development (GO:0070307)	1/6	0.225547	0.88984	0	0	4.60048	6.85116	WNT5B
lymphoid progenitor cell differentiation (GO:0002320)	1/6	0.225547	0.88984	0	0	4.60048	6.85116	FLT3
lipid hydroxylation (GO:0002933)	1/6	0.225547	0.88984	0	0	4.60048	6.85116	CYP3A4
regulation of interleukin-12 secretion (GO:2001182)	1/6	0.225547	0.88984	0	0	4.60048	6.85116	LILRB1
regulation of interferon-alpha secretion (GO:1902739)	1/6	0.225547	0.88984	0	0	4.60048	6.85116	DDX58
positive regulation of action potential (GO:0045760)	1/6	0.225547	0.88984	0	0	4.60048	6.85116	SCN5A
hormone transport (GO:0009914)	1/6	0.225547	0.88984	0	0	4.60048	6.85116	FFAR4
protein geranylgeranylation (GO:0018344)	1/6	0.225547	0.88984	0	0	4.60048	6.85116	CHM
dosage compensation by inactivation of X chromosome (GO:0009048)	1/6	0.225547	0.88984	0	0	4.60048	6.85116	BRCA1
NADH metabolic process (GO:0006734)	1/6	0.225547	0.88984	0	0	4.60048	6.85116	NUDT12
positive regulation of cholesterol storage (GO:0010886)	1/6	0.225547	0.88984	0	0	4.60048	6.85116	LPL
ventricular compact myocardium morphogenesis (GO:0003223)	1/6	0.225547	0.88984	0	0	4.60048	6.85116	BMPR1A
telencephalon cell migration (GO:0022029)	1/6	0.225547	0.88984	0	0	4.60048	6.85116	LRRK2
regulation of interleukin-10 secretion (GO:2001179)	1/6	0.225547	0.88984	0	0	4.60048	6.85116	LILRB1
cellular response to bacterial lipopeptide (GO:0071221)	1/6	0.225547	0.88984	0	0	4.60048	6.85116	CD36
aggrephagy (GO:0035973)	1/6	0.225547	0.88984	0	0	4.60048	6.85116	WDFY3
positive regulation of activation of Janus kinase activity (GO:0010536)	1/6	0.225547	0.88984	0	0	4.60048	6.85116	IL23R
regulation of T-helper 17 cell lineage commitment (GO:2000328)	1/6	0.225547	0.88984	0	0	4.60048	6.85116	IL23R
positive regulation of sodium ion transmembrane transport (GO:1902307)	1/6	0.225547	0.88984	0	0	4.60048	6.85116	WNK3
positive regulation of interferon-alpha secretion (GO:1902741)	1/6	0.225547	0.88984	0	0	4.60048	6.85116	DDX58
cellular nitrogen compound catabolic process (GO:0044270)	1/6	0.225547	0.88984	0	0	4.60048	6.85116	CYP3A4
regulation of cardiac muscle hypertrophy in response to stress (GO:1903242)	1/6	0.225547	0.88984	0	0	4.60048	6.85116	ATP2B4
negative regulation of delayed rectifier potassium channel activity (GO:1902260)	1/6	0.225547	0.88984	0	0	4.60048	6.85116	KCNE3
morphogenesis of an endothelium (GO:0003159)	1/6	0.225547	0.88984	0	0	4.60048	6.85116	ACVRL1
regulation of natural killer cell proliferation (GO:0032817)	1/6	0.225547	0.88984	0	0	4.60048	6.85116	IL23R
negative regulation of meiotic nuclear division (GO:0045835)	1/6	0.225547	0.88984	0	0	4.60048	6.85116	HORMAD1
endosome to lysosome transport via multivesicular body sorting pathway (GO:0032510)	1/6	0.225547	0.88984	0	0	4.60048	6.85116	LYST
sterol import (GO:0035376)	1/6	0.225547	0.88984	0	0	4.60048	6.85116	CD36
organic hydroxy compound catabolic process (GO:1901616)	1/6	0.225547	0.88984	0	0	4.60048	6.85116	ADH4
L-amino acid import (GO:0043092)	1/6	0.225547	0.88984	0	0	4.60048	6.85116	SLC1A3
positive regulation of fibroblast apoptotic process (GO:2000271)	1/6	0.225547	0.88984	0	0	4.60048	6.85116	TP63
response to manganese ion (GO:0010042)	1/6	0.225547	0.88984	0	0	4.60048	6.85116	LRRK2
cholesterol import (GO:0070508)	1/6	0.225547	0.88984	0	0	4.60048	6.85116	CD36
regulation of osteoclast development (GO:2001204)	1/6	0.225547	0.88984	0	0	4.60048	6.85116	LILRB1
regulation of microtubule nucleation (GO:0010968)	1/6	0.225547	0.88984	0	0	4.60048	6.85116	HSPA1A
positive regulation of MAPK cascade (GO:0043410)	15/289	0.227462	0.88984	0	0	1.2628	1.86992	PDGFRB;CSF1R;FLT3;FCRL3;LRRK2;CARD9;ALOX15;TNFRSF10C;MERTK;SCIMP;TRIM5;GPER1;FFAR4;CD36;EPHB2
regulation of MAPK cascade (GO:0043408)	11/203	0.228266	0.88984	0	0	1.32084	1.9512	PDGFRB;CSF1R;CEACAM1;SPRED1;TRIM5;FLT3;FCRL3;GPER1;TNFRSF10C;EPHB2;MERTK
negative regulation of sequence-specific DNA binding transcription factor activity (GO:0043433)	8/140	0.230098	0.88984	0	0	1.39658	2.05193	PARP10;NLRP12;AIM2;ANXA4;CARD8;CYP1B1;SIK1;CMKLR1
steroid metabolic process (GO:0008202)	6/99	0.231812	0.88984	0	0	1.48613	2.17247	GUCY2C;CYP1B1;HSD17B4;DHCR24;CYP3A4;CYP17A1
negative regulation of ERK1 and ERK2 cascade (GO:0070373)	3/40	0.232331	0.88984	0	0	1.86643	2.72422	RGS14;GPER1;EPHB2
regulation of release of cytochrome c from mitochondria (GO:0090199)	3/40	0.232331	0.88984	0	0	1.86643	2.72422	GPER1;HGF;CIDEB
acylglycerol homeostasis (GO:0055090)	2/22	0.233152	0.88984	0	0	2.3012	3.3507	LPL;NR1H3
glutathione derivative biosynthetic process (GO:1901687)	2/22	0.233152	0.88984	0	0	2.3012	3.3507	GSTM4;GSTM1
protein homotrimerization (GO:0070207)	2/22	0.233152	0.88984	0	0	2.3012	3.3507	SIGMAR1;DISP1
outflow tract septum morphogenesis (GO:0003148)	2/22	0.233152	0.88984	0	0	2.3012	3.3507	SEMA3C;BMPR1A
negative regulation of response to endoplasmic reticulum stress (GO:1903573)	2/22	0.233152	0.88984	0	0	2.3012	3.3507	LRRK2;HSPA1A
peripheral nervous system development (GO:0007422)	2/22	0.233152	0.88984	0	0	2.3012	3.3507	GPC1;SERPINI1
urogenital system development (GO:0001655)	2/22	0.233152	0.88984	0	0	2.3012	3.3507	EPHB2;ALOX15B
C21-steroid hormone metabolic process (GO:0008207)	2/22	0.233152	0.88984	0	0	2.3012	3.3507	GUCY2C;CYP17A1
cellular response to unfolded protein (GO:0034620)	2/22	0.233152	0.88984	0	0	2.3012	3.3507	HSPA7;HSPA1A
inner ear morphogenesis (GO:0042472)	2/22	0.233152	0.88984	0	0	2.3012	3.3507	MYO3B;EPHB2
negative regulation of GTPase activity (GO:0034260)	2/22	0.233152	0.88984	0	0	2.3012	3.3507	LRRK2;USP17L2
glutathione derivative metabolic process (GO:1901685)	2/22	0.233152	0.88984	0	0	2.3012	3.3507	GSTM4;GSTM1
activation of cysteine-type endopeptidase activity involved in apoptotic process (GO:0006919)	5/79	0.233301	0.88984	0	0	1.55609	2.26478	NLRP12;CASP5;NLRC4;S100A9;S100A8
phosphate-containing compound metabolic process (GO:0006796)	10/183	0.234543	0.88984	0	0	1.33236	1.93207	INPP4B;DUSP23;PTPRB;LRRK2;PLA2G4C;LPL;ACYP1;EPHB2;HDHD2;XYLB
Golgi organization (GO:0007030)	7/121	0.241022	0.88984	0	0	1.41458	2.01276	GOLGA6A;ATP8B4;LMAN2L;ATP8B1;LRRK2;TMED7-TICAM2;GOLPH3L
cellular response to hormone stimulus (GO:0032870)	5/80	0.241075	0.88984	0	0	1.53526	2.18414	GNRHR2;GPER1;GNRHR;FFAR4;SIK1
negative regulation of proteolysis (GO:0045861)	3/41	0.243548	0.88984	0	0	1.81721	2.56671	LRRK2;F2;USP17L2
regulation of cell migration (GO:0030334)	16/316	0.247336	0.88984	0	0	1.23006	1.7184	ACVRL1;PDGFRB;CSF1R;WNT5B;SEMA3C;DDX58;SEMA3D;HGF;SEMA3A;PRR5L;USP17L2;ALOX15B;CEACAM1;GPER1;NKX2-1;CYP1B1
exogenous drug catabolic process (GO:0042738)	2/23	0.248799	0.88984	0	0	2.19151	3.04863	CYP2J2;CYP3A4
cellular response to catecholamine stimulus (GO:0071870)	2/23	0.248799	0.88984	0	0	2.19151	3.04863	LRRK2;ATP2B4
glycolytic process (GO:0006096)	2/23	0.248799	0.88984	0	0	2.19151	3.04863	HK3;HKDC1
cellular nitrogen compound biosynthetic process (GO:0044271)	2/23	0.248799	0.88984	0	0	2.19151	3.04863	SPR;CYP1B1
regulation of smooth muscle contraction (GO:0006940)	2/23	0.248799	0.88984	0	0	2.19151	3.04863	CNN1;TACR1
regulation of dendritic spine morphogenesis (GO:0061001)	2/23	0.248799	0.88984	0	0	2.19151	3.04863	ARHGAP44;LRRK2
rRNA methylation (GO:0031167)	2/23	0.248799	0.88984	0	0	2.19151	3.04863	NSUN5P2;MRM1
regulation of cell size (GO:0008361)	2/23	0.248799	0.88984	0	0	2.19151	3.04863	DEPTOR;LARS
protein targeting to membrane (GO:0006612)	4/61	0.249482	0.88984	0	0	1.61564	2.24311	NCF1;ARL6;ATG4C;CHM
regulation of protein modification process (GO:0031399)	3/42	0.254849	0.88984	0	0	1.77053	2.42046	SPRED1;ATG10;FKTN
determination of left/right symmetry (GO:0007368)	3/42	0.254849	0.88984	0	0	1.77053	2.42046	MKKS;DNAI2;ARL6
negative regulation of protein secretion (GO:0050709)	3/42	0.254849	0.88984	0	0	1.77053	2.42046	NLRP12;FFAR4;NR1H3
skeletal muscle myosin thick filament assembly (GO:0030241)	1/7	0.257851	0.88984	0	0	3.83353	5.19586	MYOM2
cellular divalent inorganic anion homeostasis (GO:0072501)	1/7	0.257851	0.88984	0	0	3.83353	5.19586	GCM2
negative regulation of mitochondrial outer membrane permeabilization involved in apoptotic signaling pathway (GO:1901029)	1/7	0.257851	0.88984	0	0	3.83353	5.19586	HSPA1A
tRNA pseudouridine synthesis (GO:0031119)	1/7	0.257851	0.88984	0	0	3.83353	5.19586	RPUSD3
venous blood vessel development (GO:0060841)	1/7	0.257851	0.88984	0	0	3.83353	5.19586	ACVRL1
smooth muscle cell migration (GO:0014909)	1/7	0.257851	0.88984	0	0	3.83353	5.19586	PDGFRB
exonucleolytic trimming to generate mature 3'-end of 5.8S rRNA from tricistronic rRNA transcript (SSU-rRNA, 5.8S rRNA, LSU-rRNA) (GO:0000467)	1/7	0.257851	0.88984	0	0	3.83353	5.19586	ERI2
negative regulation of leukocyte migration (GO:0002686)	1/7	0.257851	0.88984	0	0	3.83353	5.19586	GCSAM
regulation of chromatin assembly or disassembly (GO:0001672)	1/7	0.257851	0.88984	0	0	3.83353	5.19586	PARP10
dolichyl diphosphate biosynthetic process (GO:0006489)	1/7	0.257851	0.88984	0	0	3.83353	5.19586	DPAGT1
positive regulation of glutamate receptor signaling pathway (GO:1900451)	1/7	0.257851	0.88984	0	0	3.83353	5.19586	EPHB2
cellular trivalent inorganic anion homeostasis (GO:0072502)	1/7	0.257851	0.88984	0	0	3.83353	5.19586	GCM2
exonucleolytic trimming involved in rRNA processing (GO:0000459)	1/7	0.257851	0.88984	0	0	3.83353	5.19586	ERI2
tachykinin receptor signaling pathway (GO:0007217)	1/7	0.257851	0.88984	0	0	3.83353	5.19586	TACR1
negative regulation of interleukin-8 secretion (GO:2000483)	1/7	0.257851	0.88984	0	0	3.83353	5.19586	ANXA4
regulation of MDA-5 signaling pathway (GO:0039533)	1/7	0.257851	0.88984	0	0	3.83353	5.19586	USP17L2
hemostasis (GO:0007599)	1/7	0.257851	0.88984	0	0	3.83353	5.19586	NFE2
positive regulation of histone H3-K9 methylation (GO:0051574)	1/7	0.257851	0.88984	0	0	3.83353	5.19586	INSL6
ornithine transport (GO:0015822)	1/7	0.257851	0.88984	0	0	3.83353	5.19586	SLC25A20
mitral valve development (GO:0003174)	1/7	0.257851	0.88984	0	0	3.83353	5.19586	BMPR1A
regulation of lymphocyte migration (GO:2000401)	1/7	0.257851	0.88984	0	0	3.83353	5.19586	GCSAM
vesicle transport along actin filament (GO:0030050)	1/7	0.257851	0.88984	0	0	3.83353	5.19586	MYRIP
regulation of tube diameter (GO:0035296)	1/7	0.257851	0.88984	0	0	3.83353	5.19586	UTS2
positive regulation of histone H4 acetylation (GO:0090240)	1/7	0.257851	0.88984	0	0	3.83353	5.19586	BRCA1
negative regulation of type 2 immune response (GO:0002829)	1/7	0.257851	0.88984	0	0	3.83353	5.19586	CCR2
dolichyl diphosphate metabolic process (GO:0046465)	1/7	0.257851	0.88984	0	0	3.83353	5.19586	DPAGT1
pteridine-containing compound biosynthetic process (GO:0042559)	1/7	0.257851	0.88984	0	0	3.83353	5.19586	SPR
molybdopterin cofactor metabolic process (GO:0043545)	1/7	0.257851	0.88984	0	0	3.83353	5.19586	MOCS1
lymphatic endothelial cell differentiation (GO:0060836)	1/7	0.257851	0.88984	0	0	3.83353	5.19586	ACVRL1
regulation of toll-like receptor 9 signaling pathway (GO:0034163)	1/7	0.257851	0.88984	0	0	3.83353	5.19586	FCRL3
terpenoid metabolic process (GO:0006721)	1/7	0.257851	0.88984	0	0	3.83353	5.19586	CYP3A4
regulation of T-helper 17 type immune response (GO:2000316)	1/7	0.257851	0.88984	0	0	3.83353	5.19586	IL23R
regulation of isotype switching (GO:0045191)	1/7	0.257851	0.88984	0	0	3.83353	5.19586	INSL6
negative regulation of platelet-derived growth factor receptor-beta signaling pathway (GO:2000587)	1/7	0.257851	0.88984	0	0	3.83353	5.19586	PDGFRB
carnitine transport (GO:0015879)	1/7	0.257851	0.88984	0	0	3.83353	5.19586	SLC25A20
regulation of interleukin-18 production (GO:0032661)	1/7	0.257851	0.88984	0	0	3.83353	5.19586	NLRP12
amino-acid betaine transport (GO:0015838)	1/7	0.257851	0.88984	0	0	3.83353	5.19586	SLC25A20
regulation of response to biotic stimulus (GO:0002831)	1/7	0.257851	0.88984	0	0	3.83353	5.19586	TRIM5
negative regulation of cell adhesion mediated by integrin (GO:0033629)	1/7	0.257851	0.88984	0	0	3.83353	5.19586	CYP1B1
regulation of memory T cell differentiation (GO:0043380)	1/7	0.257851	0.88984	0	0	3.83353	5.19586	IL23R
positive regulation of lymphocyte apoptotic process (GO:0070230)	1/7	0.257851	0.88984	0	0	3.83353	5.19586	IDO1
regulation of histone H3-K9 acetylation (GO:2000615)	1/7	0.257851	0.88984	0	0	3.83353	5.19586	BRCA1
regulation of atrial cardiac muscle cell membrane repolarization (GO:0060372)	1/7	0.257851	0.88984	0	0	3.83353	5.19586	SCN5A
positive regulation of NK T cell activation (GO:0051135)	1/7	0.257851	0.88984	0	0	3.83353	5.19586	IL23R
regulation of high voltage-gated calcium channel activity (GO:1901841)	1/7	0.257851	0.88984	0	0	3.83353	5.19586	CACNB2
protein deglutamylation (GO:0035608)	1/7	0.257851	0.88984	0	0	3.83353	5.19586	AGBL2
positive regulation of inositol phosphate biosynthetic process (GO:0060732)	1/7	0.257851	0.88984	0	0	3.83353	5.19586	GPER1
regulation of transcription from RNA polymerase II promoter involved in heart development (GO:1901213)	1/7	0.257851	0.88984	0	0	3.83353	5.19586	BMPR1A
negative regulation of nitric oxide metabolic process (GO:1904406)	1/7	0.257851	0.88984	0	0	3.83353	5.19586	ATP2B4
peptidyl-lysine deacetylation (GO:0034983)	1/7	0.257851	0.88984	0	0	3.83353	5.19586	HDAC9
negative regulation of macrophage activation (GO:0043031)	1/7	0.257851	0.88984	0	0	3.83353	5.19586	NR1H3
positive regulation of RIG-I signaling pathway (GO:1900246)	1/7	0.257851	0.88984	0	0	3.83353	5.19586	USP17L2
regulation of pinocytosis (GO:0048548)	1/7	0.257851	0.88984	0	0	3.83353	5.19586	NR1H3
positive regulation of tumor necrosis factor-mediated signaling pathway (GO:1903265)	1/7	0.257851	0.88984	0	0	3.83353	5.19586	HSPA1A
positive regulation of fatty acid beta-oxidation (GO:0032000)	1/7	0.257851	0.88984	0	0	3.83353	5.19586	ABCD2
positive regulation of neuroblast proliferation (GO:0002052)	1/7	0.257851	0.88984	0	0	3.83353	5.19586	DISC1
positive regulation of sequestering of triglyceride (GO:0010890)	1/7	0.257851	0.88984	0	0	3.83353	5.19586	LPL
V(D)J recombination (GO:0033151)	1/7	0.257851	0.88984	0	0	3.83353	5.19586	RAG1
pharyngeal arch artery morphogenesis (GO:0061626)	1/7	0.257851	0.88984	0	0	3.83353	5.19586	BMPR1A
negative regulation of dendritic cell apoptotic process (GO:2000669)	1/7	0.257851	0.88984	0	0	3.83353	5.19586	LILRB1
wound healing, spreading of epidermal cells (GO:0035313)	1/7	0.257851	0.88984	0	0	3.83353	5.19586	ACVRL1
ethanol catabolic process (GO:0006068)	1/7	0.257851	0.88984	0	0	3.83353	5.19586	SULT1B1
hyaluronan biosynthetic process (GO:0030213)	1/7	0.257851	0.88984	0	0	3.83353	5.19586	ABCC5
pentose metabolic process (GO:0019321)	1/7	0.257851	0.88984	0	0	3.83353	5.19586	XYLB
negative regulation of nitric oxide biosynthetic process (GO:0045019)	1/7	0.257851	0.88984	0	0	3.83353	5.19586	ATP2B4
molybdopterin cofactor biosynthetic process (GO:0032324)	1/7	0.257851	0.88984	0	0	3.83353	5.19586	MOCS1
copper ion import (GO:0015677)	1/7	0.257851	0.88984	0	0	3.83353	5.19586	STEAP4
regulation of cell-cell adhesion mediated by integrin (GO:0033632)	1/7	0.257851	0.88984	0	0	3.83353	5.19586	DPP4
SA node cell action potential (GO:0086015)	1/7	0.257851	0.88984	0	0	3.83353	5.19586	SCN5A
regulation of activation of Janus kinase activity (GO:0010533)	1/7	0.257851	0.88984	0	0	3.83353	5.19586	IL23R
negative regulation of T cell cytokine production (GO:0002725)	1/7	0.257851	0.88984	0	0	3.83353	5.19586	HFE
lens fiber cell differentiation (GO:0070306)	1/7	0.257851	0.88984	0	0	3.83353	5.19586	WNT5B
ethanol metabolic process (GO:0006067)	1/7	0.257851	0.88984	0	0	3.83353	5.19586	SULT1B1
regulation of skeletal muscle fiber development (GO:0048742)	1/7	0.257851	0.88984	0	0	3.83353	5.19586	HDAC9
amino acid import across plasma membrane (GO:0089718)	1/7	0.257851	0.88984	0	0	3.83353	5.19586	SLC1A3
myoblast fusion (GO:0007520)	1/7	0.257851	0.88984	0	0	3.83353	5.19586	KCNH1
regulation of protein heterodimerization activity (GO:0043497)	1/7	0.257851	0.88984	0	0	3.83353	5.19586	CD36
ER overload response (GO:0006983)	1/7	0.257851	0.88984	0	0	3.83353	5.19586	ATG10
long-chain fatty acid import (GO:0044539)	1/7	0.257851	0.88984	0	0	3.83353	5.19586	CD36
cellular phosphate ion homeostasis (GO:0030643)	1/7	0.257851	0.88984	0	0	3.83353	5.19586	GCM2
tRNA processing (GO:0008033)	4/62	0.258693	0.88984	0	0	1.5877	2.14675	POP5;RPP40;C9ORF64;FARS2
positive regulation of histone methylation (GO:0031062)	2/24	0.264476	0.88984	0	0	2.09178	2.78208	INSL6;BRCA1
positive regulation of neutrophil chemotaxis (GO:0090023)	2/24	0.264476	0.88984	0	0	2.09178	2.78208	MOSPD2;THBS4
cellular lipid catabolic process (GO:0044242)	2/24	0.264476	0.88984	0	0	2.09178	2.78208	NUDT7;CYP1B1
negative regulation of protein localization to membrane (GO:1905476)	2/24	0.264476	0.88984	0	0	2.09178	2.78208	MRAP;USP17L2
Golgi to plasma membrane protein transport (GO:0043001)	2/24	0.264476	0.88984	0	0	2.09178	2.78208	ARFRP1;GOLPH3L
ATP generation from ADP (GO:0006757)	2/24	0.264476	0.88984	0	0	2.09178	2.78208	HK3;HKDC1
drug catabolic process (GO:0042737)	2/24	0.264476	0.88984	0	0	2.09178	2.78208	CYP2J2;CYP3A4
neuromuscular synaptic transmission (GO:0007274)	2/24	0.264476	0.88984	0	0	2.09178	2.78208	DTNA;STAC3
regulation of transmembrane transport (GO:0034762)	2/24	0.264476	0.88984	0	0	2.09178	2.78208	KCNJ1;KCNJ2
chaperone mediated protein folding requiring cofactor (GO:0051085)	2/24	0.264476	0.88984	0	0	2.09178	2.78208	HSPA7;HSPA1A
negative regulation of T cell proliferation (GO:0042130)	2/24	0.264476	0.88984	0	0	2.09178	2.78208	LILRB1;HLA-G
cGMP biosynthetic process (GO:0006182)	2/24	0.264476	0.88984	0	0	2.09178	2.78208	GUCY2C;GUCY2D
positive regulation of interferon-gamma production (GO:0032729)	3/43	0.266221	0.88984	0	0	1.72617	2.28447	IL23R;SLAMF6;CCR2
RNA catabolic process (GO:0006401)	3/43	0.266221	0.88984	0	0	1.72617	2.28447	RNASE3;RNASE2;HSPA1A
peptide metabolic process (GO:0006518)	6/104	0.266744	0.88984	0	0	1.40994	1.86318	GSTM4;NLN;PCSK1;GSTM1;GDAP1L1;F2
negative regulation of protein modification process (GO:0031400)	4/63	0.267969	0.88984	0	0	1.56071	2.05528	LRRK2;ATP2B4;PRR5L;EPHB2
regulation of viral genome replication (GO:0045069)	4/63	0.267969	0.88984	0	0	1.56071	2.05528	PARP10;FAM111A;RNASEL;OAS1
cellular response to molecule of bacterial origin (GO:0071219)	5/84	0.272811	0.88984	0	0	1.45722	1.8929	CXCL10;DEFA3;NR1H3;LILRB1;DEFA1
glycerophospholipid metabolic process (GO:0006650)	4/64	0.277303	0.88984	0	0	1.53462	1.96837	PDGFRB;CSF1R;PLA2G4C;PIGZ
negative regulation of immune system process (GO:0002683)	3/44	0.277651	0.88984	0	0	1.68398	2.15784	NLRP12;GPER1;HLA-G
positive regulation of interleukin-8 production (GO:0032757)	3/44	0.277651	0.88984	0	0	1.68398	2.15784	DDX58;TLR5;HSPA1A
regulation of intracellular pH (GO:0051453)	3/44	0.277651	0.88984	0	0	1.68398	2.15784	LRRK2;SLC26A8;SLC4A4
carboxylic acid biosynthetic process (GO:0046394)	3/44	0.277651	0.88984	0	0	1.68398	2.15784	DPAGT1;UGDH;ABCC5
regulation of voltage-gated calcium channel activity (GO:1901385)	2/25	0.280154	0.88984	0	0	2.00073	2.54576	CACNB2;STAC3
positive regulation of phosphatidylinositol 3-kinase activity (GO:0043552)	2/25	0.280154	0.88984	0	0	2.00073	2.54576	PDGFRB;FLT3
cyclic nucleotide metabolic process (GO:0009187)	2/25	0.280154	0.88984	0	0	2.00073	2.54576	GUCY2C;GUCY2D
potassium ion homeostasis (GO:0055075)	2/25	0.280154	0.88984	0	0	2.00073	2.54576	KCNH2;KCNJ2
positive regulation of interleukin-12 production (GO:0032735)	2/25	0.280154	0.88984	0	0	2.00073	2.54576	IL23R;HLA-G
ncRNA 3'-end processing (GO:0043628)	2/25	0.280154	0.88984	0	0	2.00073	2.54576	EXOSC5;INTS7
long-chain fatty acid transport (GO:0015909)	2/25	0.280154	0.88984	0	0	2.00073	2.54576	SLC25A20;CD36
respiratory tube development (GO:0030323)	2/25	0.280154	0.88984	0	0	2.00073	2.54576	ITGA3;NKX2-1
positive regulation of neutrophil migration (GO:1902624)	2/25	0.280154	0.88984	0	0	2.00073	2.54576	MOSPD2;THBS4
fatty acid metabolic process (GO:0006631)	6/106	0.281076	0.88984	0	0	1.38159	1.75342	ABCD2;NUDT7;MECR;ALOX15;LPL;ALOX15B
positive regulation of NF-kappaB transcription factor activity (GO:0051092)	7/128	0.286074	0.88984	0	0	1.33226	1.66733	AIM2;TRIM5;CD36;NLRC4;S100A9;S100A8;HSPA1A
regulation of JAK-STAT cascade (GO:0046425)	4/65	0.286689	0.88984	0	0	1.50938	1.88576	IL23R;CHAD;LRRC3;CYP1B1
protein transport (GO:0015031)	16/326	0.287093	0.88984	0	0	1.18975	1.48474	TBC1D8B;LMAN2L;STX19;HFE;TMED7-TICAM2;GOLPH3L;RAB39A;ARFRP1;TBCK;RAB40B;IFT27;ARFIP1;CD36;VPS45;ATP6V1E2;RAB40AL
regulation of response to external stimulus (GO:0032101)	6/107	0.288306	0.88984	0	0	1.36784	1.70123	HCK;NLRP12;GUCY2D;CASP5;TRIM5;F2
peptidyl-cysteine modification (GO:0018198)	1/8	0.28881	0.88984	0	0	3.28571	4.08081	S100A8
neuron projection extension involved in neuron projection guidance (GO:1902284)	1/8	0.28881	0.88984	0	0	3.28571	4.08081	SEMA3A
cell migration involved in heart development (GO:0060973)	1/8	0.28881	0.88984	0	0	3.28571	4.08081	PDGFRB
lipoprotein transport (GO:0042953)	1/8	0.28881	0.88984	0	0	3.28571	4.08081	CD36
negative regulation of appetite (GO:0032099)	1/8	0.28881	0.88984	0	0	3.28571	4.08081	MKKS
regulation of fibroblast apoptotic process (GO:2000269)	1/8	0.28881	0.88984	0	0	3.28571	4.08081	TP63
regulation of calcium ion transmembrane transport via high voltage-gated calcium channel (GO:1902514)	1/8	0.28881	0.88984	0	0	3.28571	4.08081	CACNB2
cellular response to prostaglandin E stimulus (GO:0071380)	1/8	0.28881	0.88984	0	0	3.28571	4.08081	PTGDR
positive regulation of isotype switching (GO:0045830)	1/8	0.28881	0.88984	0	0	3.28571	4.08081	INSL6
negative regulation of glial cell differentiation (GO:0045686)	1/8	0.28881	0.88984	0	0	3.28571	4.08081	F2
response to epinephrine (GO:0071871)	1/8	0.28881	0.88984	0	0	3.28571	4.08081	ATP2B4
protein lipoylation (GO:0009249)	1/8	0.28881	0.88984	0	0	3.28571	4.08081	POP5
ventricular cardiac muscle cell membrane repolarization (GO:0099625)	1/8	0.28881	0.88984	0	0	3.28571	4.08081	KCNH2
aorta development (GO:0035904)	1/8	0.28881	0.88984	0	0	3.28571	4.08081	PDGFRB
establishment of integrated proviral latency (GO:0075713)	1/8	0.28881	0.88984	0	0	3.28571	4.08081	XRCC4
galactose catabolic process (GO:0019388)	1/8	0.28881	0.88984	0	0	3.28571	4.08081	GALK1
T-helper 17 cell differentiation (GO:0072539)	1/8	0.28881	0.88984	0	0	3.28571	4.08081	SLAMF6
negative regulation of platelet aggregation (GO:0090331)	1/8	0.28881	0.88984	0	0	3.28571	4.08081	CEACAM1
amyloid fibril formation (GO:1990000)	1/8	0.28881	0.88984	0	0	3.28571	4.08081	CD36
positive regulation of steroid biosynthetic process (GO:0010893)	1/8	0.28881	0.88984	0	0	3.28571	4.08081	GUCY2C
intestinal cholesterol absorption (GO:0030299)	1/8	0.28881	0.88984	0	0	3.28571	4.08081	CD36
negative regulation of potassium ion transmembrane transporter activity (GO:1901017)	1/8	0.28881	0.88984	0	0	3.28571	4.08081	KCNE3
positive regulation of DNA recombination (GO:0045911)	1/8	0.28881	0.88984	0	0	3.28571	4.08081	INSL6
negative regulation of monooxygenase activity (GO:0032769)	1/8	0.28881	0.88984	0	0	3.28571	4.08081	ATP2B4
coronary vasculature morphogenesis (GO:0060977)	1/8	0.28881	0.88984	0	0	3.28571	4.08081	SPRED1
regulation of protein deacetylation (GO:0090311)	1/8	0.28881	0.88984	0	0	3.28571	4.08081	SPRED1
protein K6-linked ubiquitination (GO:0085020)	1/8	0.28881	0.88984	0	0	3.28571	4.08081	BRCA1
imidazole-containing compound catabolic process (GO:0052805)	1/8	0.28881	0.88984	0	0	3.28571	4.08081	AMDHD1
regulation of endodeoxyribonuclease activity (GO:0032071)	1/8	0.28881	0.88984	0	0	3.28571	4.08081	GZMA
phagolysosome assembly (GO:0001845)	1/8	0.28881	0.88984	0	0	3.28571	4.08081	RAB39A
benzene-containing compound metabolic process (GO:0042537)	1/8	0.28881	0.88984	0	0	3.28571	4.08081	KMO
isoprenoid metabolic process (GO:0006720)	1/8	0.28881	0.88984	0	0	3.28571	4.08081	PDSS2
axon extension involved in axon guidance (GO:0048846)	1/8	0.28881	0.88984	0	0	3.28571	4.08081	SEMA3A
protein desumoylation (GO:0016926)	1/8	0.28881	0.88984	0	0	3.28571	4.08081	SENP8
regulation of cytoplasmic transport (GO:1903649)	1/8	0.28881	0.88984	0	0	3.28571	4.08081	LRRK2
positive regulation of cAMP-mediated signaling (GO:0043950)	1/8	0.28881	0.88984	0	0	3.28571	4.08081	CXCL10
T-helper cell lineage commitment (GO:0002295)	1/8	0.28881	0.88984	0	0	3.28571	4.08081	SLAMF6
atrial cardiac muscle cell to AV node cell signaling (GO:0086026)	1/8	0.28881	0.88984	0	0	3.28571	4.08081	SCN5A
insulin metabolic process (GO:1901142)	1/8	0.28881	0.88984	0	0	3.28571	4.08081	CEACAM1
negative regulation of voltage-gated potassium channel activity (GO:1903817)	1/8	0.28881	0.88984	0	0	3.28571	4.08081	KCNE3
glycosyl compound metabolic process (GO:1901657)	1/8	0.28881	0.88984	0	0	3.28571	4.08081	KL
positive regulation of IRE1-mediated unfolded protein response (GO:1903896)	1/8	0.28881	0.88984	0	0	3.28571	4.08081	HSPA1A
isoprenoid biosynthetic process (GO:0008299)	1/8	0.28881	0.88984	0	0	3.28571	4.08081	PDSS2
cell junction maintenance (GO:0034331)	1/8	0.28881	0.88984	0	0	3.28571	4.08081	CSF1R
positive regulation of tumor necrosis factor biosynthetic process (GO:0042535)	1/8	0.28881	0.88984	0	0	3.28571	4.08081	CCR2
cellular response to epinephrine stimulus (GO:0071872)	1/8	0.28881	0.88984	0	0	3.28571	4.08081	ATP2B4
negative regulation of centriole replication (GO:0046600)	1/8	0.28881	0.88984	0	0	3.28571	4.08081	BRCA1
histone H4 deacetylation (GO:0070933)	1/8	0.28881	0.88984	0	0	3.28571	4.08081	HDAC9
histidine catabolic process (GO:0006548)	1/8	0.28881	0.88984	0	0	3.28571	4.08081	AMDHD1
positive regulation of regulatory T cell differentiation (GO:0045591)	1/8	0.28881	0.88984	0	0	3.28571	4.08081	HLA-G
positive regulation of immunoglobulin mediated immune response (GO:0002891)	1/8	0.28881	0.88984	0	0	3.28571	4.08081	INSL6
positive regulation of vasculogenesis (GO:2001214)	1/8	0.28881	0.88984	0	0	3.28571	4.08081	CEACAM1
fatty acid alpha-oxidation (GO:0001561)	1/8	0.28881	0.88984	0	0	3.28571	4.08081	PECR
histidine metabolic process (GO:0006547)	1/8	0.28881	0.88984	0	0	3.28571	4.08081	AMDHD1
catecholamine catabolic process (GO:0042424)	1/8	0.28881	0.88984	0	0	3.28571	4.08081	MAOB
cGMP-mediated signaling (GO:0019934)	1/8	0.28881	0.88984	0	0	3.28571	4.08081	CD36
regulation of lipid transport (GO:0032368)	1/8	0.28881	0.88984	0	0	3.28571	4.08081	NR1H3
cellular response to purine-containing compound (GO:0071415)	1/8	0.28881	0.88984	0	0	3.28571	4.08081	TRPM2
ventricular trabecula myocardium morphogenesis (GO:0003222)	1/8	0.28881	0.88984	0	0	3.28571	4.08081	BMPR1A
leptin-mediated signaling pathway (GO:0033210)	1/8	0.28881	0.88984	0	0	3.28571	4.08081	MKKS
membrane lipid catabolic process (GO:0046466)	1/8	0.28881	0.88984	0	0	3.28571	4.08081	CYP1B1
positive regulation of toll-like receptor 4 signaling pathway (GO:0034145)	1/8	0.28881	0.88984	0	0	3.28571	4.08081	NR1H3
negative regulation of vascular permeability (GO:0043116)	1/8	0.28881	0.88984	0	0	3.28571	4.08081	CEACAM1
regulation of cilium movement (GO:0003352)	1/8	0.28881	0.88984	0	0	3.28571	4.08081	C21ORF59
positive regulation of TORC1 signaling (GO:1904263)	1/8	0.28881	0.88984	0	0	3.28571	4.08081	LARS
positive regulation of lipoprotein lipase activity (GO:0051006)	1/8	0.28881	0.88984	0	0	3.28571	4.08081	NR1H3
snoRNA 3'-end processing (GO:0031126)	1/8	0.28881	0.88984	0	0	3.28571	4.08081	EXOSC5
U4 snRNA 3'-end processing (GO:0034475)	1/8	0.28881	0.88984	0	0	3.28571	4.08081	EXOSC5
regulation of dopamine receptor signaling pathway (GO:0060159)	1/8	0.28881	0.88984	0	0	3.28571	4.08081	LRRK2
aldehyde biosynthetic process (GO:0046184)	1/8	0.28881	0.88984	0	0	3.28571	4.08081	PNPO
immunoglobulin mediated immune response (GO:0016064)	1/8	0.28881	0.88984	0	0	3.28571	4.08081	GAPT
lipoprotein localization (GO:0044872)	1/8	0.28881	0.88984	0	0	3.28571	4.08081	CD36
regulation of receptor binding (GO:1900120)	1/8	0.28881	0.88984	0	0	3.28571	4.08081	HFE
cellular monovalent inorganic anion homeostasis (GO:0030320)	1/8	0.28881	0.88984	0	0	3.28571	4.08081	GCM2
regulation of apoptotic cell clearance (GO:2000425)	1/8	0.28881	0.88984	0	0	3.28571	4.08081	ALOX15
negative regulation of double-strand break repair via homologous recombination (GO:2000042)	1/8	0.28881	0.88984	0	0	3.28571	4.08081	INSL6
protein polymerization (GO:0051258)	3/45	0.289127	0.88984	0	0	1.6438	2.03978	ARL6;MSRB2;MSRB1
peptidyl-tyrosine autophosphorylation (GO:0038083)	3/45	0.289127	0.88984	0	0	1.6438	2.03978	HCK;STYK1;BMX
apoptotic cell clearance (GO:0043277)	2/26	0.295804	0.88984	0	0	1.91727	2.33534	ALOX15;NR1H3
snRNA processing (GO:0016180)	2/26	0.295804	0.88984	0	0	1.91727	2.33534	INTS3;INTS7
lipid modification (GO:0030258)	2/26	0.295804	0.88984	0	0	1.91727	2.33534	DGKG;CYP3A4
nucleotide biosynthetic process (GO:0009165)	2/26	0.295804	0.88984	0	0	1.91727	2.33534	GUCY2C;GUCY2D
regulation of p38MAPK cascade (GO:1900744)	2/26	0.295804	0.88984	0	0	1.91727	2.33534	NCF1;SASH1
positive regulation of granulocyte chemotaxis (GO:0071624)	2/26	0.295804	0.88984	0	0	1.91727	2.33534	MOSPD2;THBS4
tRNA methylation (GO:0030488)	2/26	0.295804	0.88984	0	0	1.91727	2.33534	TRMT10A;TRMT1L
T cell activation involved in immune response (GO:0002286)	2/26	0.295804	0.88984	0	0	1.91727	2.33534	LILRB1;CD1C
positive regulation of release of cytochrome c from mitochondria (GO:0090200)	2/26	0.295804	0.88984	0	0	1.91727	2.33534	GPER1;CIDEB
endocrine system development (GO:0035270)	2/26	0.295804	0.88984	0	0	1.91727	2.33534	GCM2;NKX2-1
snRNA 3'-end processing (GO:0034472)	2/26	0.295804	0.88984	0	0	1.91727	2.33534	EXOSC5;INTS7
intracellular steroid hormone receptor signaling pathway (GO:0030518)	4/66	0.296119	0.88984	0	0	1.48496	1.80718	GPER1;DEFA3;BRCA1;DEFA1
regulation of MAP kinase activity (GO:0043405)	5/87	0.297159	0.88984	0	0	1.40369	1.70336	PDGFRB;RGS14;FLT3;LRRK2;EPHB2
protein localization to plasma membrane (GO:0072659)	7/130	0.299307	0.88984	0	0	1.31046	1.58079	MRAP;CACNB2;ARFRP1;RAB40B;WNK3;GOLPH3L;RAB40AL
positive regulation of ion transport (GO:0043270)	3/46	0.300637	0.88984	0	0	1.60549	1.92956	CACNB2;WNK3;SCN5A
negative regulation of protein kinase activity (GO:0006469)	6/109	0.30288	0.88984	0	0	1.34114	1.60189	SPRED1;CEACAM1;DEPTOR;CHAD;LRRC3;EPHB2
endocytosis (GO:0006897)	13/263	0.304472	0.88984	0	0	1.19809	1.42474	CD163;LRRK2;MERTK;HEATR5A;HOOK2;DPYSL2;MRC1;CEACAM4;CLTCL1;AP1S1;AMPH;CD36;FCGR1B
plasma membrane bounded cell projection assembly (GO:0120031)	12/241	0.305831	0.88984	0	0	1.20722	1.43022	MKKS;DNAI2;ARL13B;ARL6;C21ORF59;DNAH6;DZIP1L;IFT80;CEP41;CC2D2A;CEP89;FGD2
organelle assembly (GO:0070925)	18/376	0.307217	0.88984	0	0	1.15889	1.36772	TMOD1;MKKS;DNAI2;NCF1;ARL6;C21ORF59;TMOD2;DNAH6;IFT80;GOLGA6A;ATG16L2;ARL13B;SH3PXD2B;DZIP1L;ATG4C;CEP41;CC2D2A;CEP89
cellular response to peptide hormone stimulus (GO:0071375)	6/110	0.310217	0.88984	0	0	1.32818	1.55461	CEACAM1;GNRHR2;GPER1;GNRHR;HDAC9;TSHR
regulation of calcium ion transmembrane transporter activity (GO:1901019)	2/27	0.311403	0.88984	0	0	1.84048	2.14723	JPH4;CACNB2
negative regulation of smooth muscle cell proliferation (GO:0048662)	2/27	0.311403	0.88984	0	0	1.84048	2.14723	CNN1;GPER1
cardiac muscle cell development (GO:0055013)	2/27	0.311403	0.88984	0	0	1.84048	2.14723	PDGFRB;MYOM2
phagosome acidification (GO:0090383)	2/27	0.311403	0.88984	0	0	1.84048	2.14723	RAB39A;ATP6V1E2
negative regulation of myeloid leukocyte differentiation (GO:0002762)	2/27	0.311403	0.88984	0	0	1.84048	2.14723	CEACAM1;C1QC
regulation of protein transport (GO:0051223)	2/27	0.311403	0.88984	0	0	1.84048	2.14723	ARFIP1;DISP1
regulation of neurotransmitter secretion (GO:0046928)	2/27	0.311403	0.88984	0	0	1.84048	2.14723	LRRK2;GPER1
negative regulation of organelle assembly (GO:1902116)	2/27	0.311403	0.88984	0	0	1.84048	2.14723	LRRK2;BRCA1
cellular response to topologically incorrect protein (GO:0035967)	2/27	0.311403	0.88984	0	0	1.84048	2.14723	HSPA7;HSPA1A
cellular response to heat (GO:0034605)	3/47	0.312168	0.88984	0	0	1.56892	1.82656	CLPB;HSPA7;HSPA1A
positive regulation of pathway-restricted SMAD protein phosphorylation (GO:0010862)	3/47	0.312168	0.88984	0	0	1.56892	1.82656	ACVRL1;HFE;BMPR1A
negative regulation of cysteine-type endopeptidase activity involved in apoptotic process (GO:0043154)	4/68	0.315086	0.88984	0	0	1.4384	1.66122	HGF;TNFRSF10C;DHCR24;NLRC4
very-low-density lipoprotein particle remodeling (GO:0034372)	1/9	0.318478	0.88984	0	0	2.87485	3.28941	LPL
secretory granule organization (GO:0033363)	1/9	0.318478	0.88984	0	0	2.87485	3.28941	LYST
negative regulation of cytokine production involved in inflammatory response (GO:1900016)	1/9	0.318478	0.88984	0	0	2.87485	3.28941	F2
L-fucose metabolic process (GO:0042354)	1/9	0.318478	0.88984	0	0	2.87485	3.28941	FUT7
acidic amino acid transport (GO:0015800)	1/9	0.318478	0.88984	0	0	2.87485	3.28941	SLC1A3
negative regulation of response to reactive oxygen species (GO:1901032)	1/9	0.318478	0.88984	0	0	2.87485	3.28941	LRRK2
regulation of interleukin-6 biosynthetic process (GO:0045408)	1/9	0.318478	0.88984	0	0	2.87485	3.28941	NLRP12
positive regulation of triglyceride biosynthetic process (GO:0010867)	1/9	0.318478	0.88984	0	0	2.87485	3.28941	NR1H3
regulation of interleukin-1 secretion (GO:0050704)	1/9	0.318478	0.88984	0	0	2.87485	3.28941	NLRP12
positive regulation of coagulation (GO:0050820)	1/9	0.318478	0.88984	0	0	2.87485	3.28941	F2
negative regulation of mitotic nuclear division (GO:0045839)	1/9	0.318478	0.88984	0	0	2.87485	3.28941	TOM1L2
potassium ion export (GO:0071435)	1/9	0.318478	0.88984	0	0	2.87485	3.28941	KCNH2
regulation of microtubule-based movement (GO:0060632)	1/9	0.318478	0.88984	0	0	2.87485	3.28941	C21ORF59
regulation of endothelial cell differentiation (GO:0045601)	1/9	0.318478	0.88984	0	0	2.87485	3.28941	CEACAM1
positive regulation of mitochondrial translation (GO:0070131)	1/9	0.318478	0.88984	0	0	2.87485	3.28941	UQCC2
regulation of mast cell activation involved in immune response (GO:0033006)	1/9	0.318478	0.88984	0	0	2.87485	3.28941	STYK1
positive regulation of natural killer cell mediated cytotoxicity directed against tumor cell target (GO:0002860)	1/9	0.318478	0.88984	0	0	2.87485	3.28941	PVR
sphingomyelin metabolic process (GO:0006684)	1/9	0.318478	0.88984	0	0	2.87485	3.28941	SGMS2
cellular response to dopamine (GO:1903351)	1/9	0.318478	0.88984	0	0	2.87485	3.28941	LRRK2
regulation of morphogenesis of an epithelium (GO:1905330)	1/9	0.318478	0.88984	0	0	2.87485	3.28941	CXCL10
mitochondrial respiratory chain complex III assembly (GO:0034551)	1/9	0.318478	0.88984	0	0	2.87485	3.28941	UQCC2
regulation of leukocyte mediated cytotoxicity (GO:0001910)	1/9	0.318478	0.88984	0	0	2.87485	3.28941	DNASE1
L-fucose catabolic process (GO:0042355)	1/9	0.318478	0.88984	0	0	2.87485	3.28941	FUT7
positive regulation of long-term synaptic potentiation (GO:1900273)	1/9	0.318478	0.88984	0	0	2.87485	3.28941	EPHB2
adipose tissue development (GO:0060612)	1/9	0.318478	0.88984	0	0	2.87485	3.28941	SH3PXD2B
regulation of platelet-derived growth factor receptor-beta signaling pathway (GO:2000586)	1/9	0.318478	0.88984	0	0	2.87485	3.28941	PDGFRB
positive regulation of ion transmembrane transport (GO:0034767)	1/9	0.318478	0.88984	0	0	2.87485	3.28941	WNK3
response to dopamine (GO:1903350)	1/9	0.318478	0.88984	0	0	2.87485	3.28941	LRRK2
negative regulation of gluconeogenesis (GO:0045721)	1/9	0.318478	0.88984	0	0	2.87485	3.28941	SIK1
chylomicron remodeling (GO:0034371)	1/9	0.318478	0.88984	0	0	2.87485	3.28941	LPL
establishment of viral latency (GO:0019043)	1/9	0.318478	0.88984	0	0	2.87485	3.28941	XRCC4
myelin assembly (GO:0032288)	1/9	0.318478	0.88984	0	0	2.87485	3.28941	GPC1
nicotinamide nucleotide biosynthetic process (GO:0019359)	1/9	0.318478	0.88984	0	0	2.87485	3.28941	NMNAT3
response to leucine (GO:0043201)	1/9	0.318478	0.88984	0	0	2.87485	3.28941	LARS
respiratory chain complex III assembly (GO:0017062)	1/9	0.318478	0.88984	0	0	2.87485	3.28941	UQCC2
positive regulation of T cell chemotaxis (GO:0010820)	1/9	0.318478	0.88984	0	0	2.87485	3.28941	CCR2
positive regulation of natural killer cell mediated immune response to tumor cell (GO:0002857)	1/9	0.318478	0.88984	0	0	2.87485	3.28941	PVR
sympathetic ganglion development (GO:0061549)	1/9	0.318478	0.88984	0	0	2.87485	3.28941	SEMA3A
negative regulation of histone methylation (GO:0031061)	1/9	0.318478	0.88984	0	0	2.87485	3.28941	BRCA1
regulation of cytokine secretion involved in immune response (GO:0002739)	1/9	0.318478	0.88984	0	0	2.87485	3.28941	LILRB1
Golgi vesicle budding (GO:0048194)	1/9	0.318478	0.88984	0	0	2.87485	3.28941	GOLPH3L
nuclear-transcribed mRNA catabolic process, exonucleolytic, 3'-5' (GO:0034427)	1/9	0.318478	0.88984	0	0	2.87485	3.28941	EXOSC5
positive regulation of epidermis development (GO:0045684)	1/9	0.318478	0.88984	0	0	2.87485	3.28941	TMEM79
regulation of Rac protein signal transduction (GO:0035020)	1/9	0.318478	0.88984	0	0	2.87485	3.28941	ARHGAP44
oogenesis (GO:0048477)	1/9	0.318478	0.88984	0	0	2.87485	3.28941	HORMAD1
interleukin-23-mediated signaling pathway (GO:0038155)	1/9	0.318478	0.88984	0	0	2.87485	3.28941	IL23R
intestinal lipid absorption (GO:0098856)	1/9	0.318478	0.88984	0	0	2.87485	3.28941	CD36
omega-hydroxylase P450 pathway (GO:0097267)	1/9	0.318478	0.88984	0	0	2.87485	3.28941	CYP1B1
positive regulation of hemostasis (GO:1900048)	1/9	0.318478	0.88984	0	0	2.87485	3.28941	F2
regulation of bile acid biosynthetic process (GO:0070857)	1/9	0.318478	0.88984	0	0	2.87485	3.28941	GUCY2C
peroxisome fission (GO:0016559)	1/9	0.318478	0.88984	0	0	2.87485	3.28941	PEX11A
regulation of cell-cell adhesion mediated by cadherin (GO:2000047)	1/9	0.318478	0.88984	0	0	2.87485	3.28941	PLG
regulation of leukocyte activation (GO:0002694)	1/9	0.318478	0.88984	0	0	2.87485	3.28941	GPER1
negative regulation of interferon-beta production (GO:0032688)	1/9	0.318478	0.88984	0	0	2.87485	3.28941	LILRB1
fucose catabolic process (GO:0019317)	1/9	0.318478	0.88984	0	0	2.87485	3.28941	FUT7
regulation of leukocyte degranulation (GO:0043300)	1/9	0.318478	0.88984	0	0	2.87485	3.28941	STYK1
protein modification by small protein conjugation or removal (GO:0070647)	1/9	0.318478	0.88984	0	0	2.87485	3.28941	ATG10
granulocyte activation (GO:0036230)	1/9	0.318478	0.88984	0	0	2.87485	3.28941	CXCR2
hexose catabolic process (GO:0019320)	1/9	0.318478	0.88984	0	0	2.87485	3.28941	GALK1
regulation of oxidative phosphorylation (GO:0002082)	1/9	0.318478	0.88984	0	0	2.87485	3.28941	UQCC2
B cell homeostasis (GO:0001782)	1/9	0.318478	0.88984	0	0	2.87485	3.28941	GAPT
cellular response to leucine (GO:0071233)	1/9	0.318478	0.88984	0	0	2.87485	3.28941	LARS
negative regulation of lipid localization (GO:1905953)	1/9	0.318478	0.88984	0	0	2.87485	3.28941	NR1H3
regulation of flagellated sperm motility (GO:1901317)	1/9	0.318478	0.88984	0	0	2.87485	3.28941	TACR1
mitral valve morphogenesis (GO:0003183)	1/9	0.318478	0.88984	0	0	2.87485	3.28941	BMPR1A
negative regulation of potassium ion transmembrane transport (GO:1901380)	1/9	0.318478	0.88984	0	0	2.87485	3.28941	KCNH2
mesodermal cell differentiation (GO:0048333)	1/9	0.318478	0.88984	0	0	2.87485	3.28941	ITGA3
detection of mechanical stimulus involved in sensory perception (GO:0050974)	1/9	0.318478	0.88984	0	0	2.87485	3.28941	MKKS
nuclear RNA surveillance (GO:0071027)	1/9	0.318478	0.88984	0	0	2.87485	3.28941	EXOSC5
lipoprotein biosynthetic process (GO:0042158)	1/9	0.318478	0.88984	0	0	2.87485	3.28941	ATG10
positive regulation of triglyceride lipase activity (GO:0061365)	1/9	0.318478	0.88984	0	0	2.87485	3.28941	NR1H3
negative regulation of peptidyl-lysine acetylation (GO:2000757)	1/9	0.318478	0.88984	0	0	2.87485	3.28941	BRCA1
regulation of glycoprotein biosynthetic process (GO:0010559)	1/9	0.318478	0.88984	0	0	2.87485	3.28941	FKTN
pattern recognition receptor signaling pathway (GO:0002221)	3/48	0.323711	0.88984	0	0	1.53398	1.73018	CD36;S100A9;S100A8
positive regulation of chemotaxis (GO:0050921)	3/48	0.323711	0.88984	0	0	1.53398	1.73018	PDGFRB;CXCL10;CCR2
cellular macromolecule catabolic process (GO:0044265)	3/48	0.323711	0.88984	0	0	1.53398	1.73018	CHEK2;RNASE3;RNASE2
amino acid transport (GO:0006865)	3/48	0.323711	0.88984	0	0	1.53398	1.73018	SLC7A8;SLC38A10;SLC6A12
cellular response to mechanical stimulus (GO:0071260)	3/48	0.323711	0.88984	0	0	1.53398	1.73018	CASP5;TLR5;TMEM150C
positive regulation of neurogenesis (GO:0050769)	4/69	0.32461	0.88984	0	0	1.4162	1.59341	RGS14;GPER1;SEMA3A;DISC1
phosphatidylinositol metabolic process (GO:0046488)	6/112	0.324976	0.88984	0	0	1.30298	1.46456	PDGFRB;FIG4;INPP4B;CSF1R;PLA2G4C;BMX
negative regulation of protein phosphorylation (GO:0001933)	9/178	0.325325	0.88984	0	0	1.22627	1.37702	SPRED1;CEACAM1;NLRP12;DEPTOR;LRRK2;CHAD;LRRC3;PRR5L;EPHB2
adenylate cyclase-modulating G-protein coupled receptor signaling pathway (GO:0007188)	7/134	0.326133	0.88984	0	0	1.26892	1.42176	PTGFR;GPER1;OPRL1;MCHR1;RXFP2;TSHR;PTGDR
negative regulation of endocytosis (GO:0045806)	2/28	0.326927	0.88984	0	0	1.7696	1.97845	NR1H3;LILRB1
negative regulation of intracellular steroid hormone receptor signaling pathway (GO:0033144)	2/28	0.326927	0.88984	0	0	1.7696	1.97845	BRCA1;ZNF366
cellular response to hydrogen peroxide (GO:0070301)	2/28	0.326927	0.88984	0	0	1.7696	1.97845	TRPM2;CYP1B1
cellular response to alcohol (GO:0097306)	2/28	0.326927	0.88984	0	0	1.7696	1.97845	BRCA1;PTGDR
positive regulation of protein tyrosine kinase activity (GO:0061098)	2/28	0.326927	0.88984	0	0	1.7696	1.97845	CSF1R;NCF1
positive regulation of phospholipid metabolic process (GO:1903727)	2/28	0.326927	0.88984	0	0	1.7696	1.97845	PDGFRB;FLT3
regulation of lipid biosynthetic process (GO:0046890)	2/28	0.326927	0.88984	0	0	1.7696	1.97845	CEACAM1;GPER1
triglyceride homeostasis (GO:0070328)	2/28	0.326927	0.88984	0	0	1.7696	1.97845	LPL;NR1H3
cGMP metabolic process (GO:0046068)	2/28	0.326927	0.88984	0	0	1.7696	1.97845	GUCY2C;GUCY2D
antigen processing and presentation of peptide antigen via MHC class I (GO:0002474)	2/28	0.326927	0.88984	0	0	1.7696	1.97845	HFE;HLA-G
regulation of defense response to virus by virus (GO:0050690)	2/28	0.326927	0.88984	0	0	1.7696	1.97845	HCK;AP1S1
regulation of adenylate cyclase activity (GO:0045761)	2/28	0.326927	0.88984	0	0	1.7696	1.97845	TSHR;CCR2
positive regulation of ERK1 and ERK2 cascade (GO:0070374)	10/201	0.329544	0.88984	0	0	1.20565	1.33833	PDGFRB;CSF1R;FLT3;GPER1;ALOX15;FFAR4;CD36;EPHB2;MERTK;SCIMP
negative regulation of kinase activity (GO:0033673)	5/91	0.330124	0.88984	0	0	1.33812	1.48302	SPRED1;CEACAM1;DEPTOR;CHAD;LRRC3
positive regulation of cell motility (GO:2000147)	9/179	0.331169	0.88984	0	0	1.21899	1.34714	PDGFRB;CSF1R;WNT5B;SEMA3C;SEMA3D;HGF;GPER1;SEMA3A;TACR1
positive regulation of kinase activity (GO:0033674)	6/113	0.332392	0.88984	0	0	1.29074	1.42167	PDGFRB;CSF1R;FLT3;EPHB2;F2;MERTK
Rab protein signal transduction (GO:0032482)	4/70	0.334152	0.88984	0	0	1.39467	1.52878	RAB40B;RAB39A;IFT27;RAB40AL
non-recombinational repair (GO:0000726)	3/49	0.335253	0.88984	0	0	1.50055	1.6399	INSL6;XRCC4;BRCA1
RNA methylation (GO:0001510)	3/49	0.335253	0.88984	0	0	1.50055	1.6399	TRMT10A;NSUN5P2;MRM1
organic hydroxy compound biosynthetic process (GO:1901617)	3/49	0.335253	0.88984	0	0	1.50055	1.6399	ALOX15;PNPO;HSD17B4
glutathione metabolic process (GO:0006749)	3/49	0.335253	0.88984	0	0	1.50055	1.6399	GSTM4;GSTM1;GDAP1L1
regulation of ERK1 and ERK2 cascade (GO:0070372)	12/247	0.335465	0.88984	0	0	1.17602	1.28449	PDGFRB;CSF1R;CEACAM1;RGS14;FLT3;GPER1;ALOX15;FFAR4;CD36;EPHB2;MERTK;SCIMP
collagen fibril organization (GO:0030199)	2/29	0.342355	0.88984	0	0	1.70397	1.8265	COL5A3;CYP1B1
lung development (GO:0030324)	2/29	0.342355	0.88984	0	0	1.70397	1.8265	ITGA3;NKX2-1
regulation of neutrophil chemotaxis (GO:0090022)	2/29	0.342355	0.88984	0	0	1.70397	1.8265	MOSPD2;THBS4
positive regulation of epidermal growth factor receptor signaling pathway (GO:0045742)	2/29	0.342355	0.88984	0	0	1.70397	1.8265	NCF1;GPER1
MyD88-dependent toll-like receptor signaling pathway (GO:0002755)	2/29	0.342355	0.88984	0	0	1.70397	1.8265	CD36;TLR5
amino acid transmembrane transport (GO:0003333)	2/29	0.342355	0.88984	0	0	1.70397	1.8265	SLC7A8;SLC38A10
regulation of ion transport (GO:0043269)	3/50	0.346786	0.88984	0	0	1.46855	1.55526	KCNA2;KCNJ1;KCNJ2
regulation of bone mineralization (GO:0030500)	3/50	0.346786	0.88984	0	0	1.46855	1.55526	KL;BMP2K;BMPR1A
heart morphogenesis (GO:0003007)	3/50	0.346786	0.88984	0	0	1.46855	1.55526	ACVRL1;MYOM2;BMPR1A
double-strand break repair via nonhomologous end joining (GO:0006303)	3/50	0.346786	0.88984	0	0	1.46855	1.55526	INSL6;XRCC4;BRCA1
positive regulation of epidermal growth factor-activated receptor activity (GO:0045741)	1/10	0.346911	0.88984	0	0	2.55529	2.70525	NCF1
regulation of phospholipase C activity (GO:1900274)	1/10	0.346911	0.88984	0	0	2.55529	2.70525	PDGFRB
ganglion development (GO:0061548)	1/10	0.346911	0.88984	0	0	2.55529	2.70525	SEMA3A
male meiosis I (GO:0007141)	1/10	0.346911	0.88984	0	0	2.55529	2.70525	TDRD9
thyroid gland development (GO:0030878)	1/10	0.346911	0.88984	0	0	2.55529	2.70525	NKX2-1
positive regulation of calcium ion import (GO:0090280)	1/10	0.346911	0.88984	0	0	2.55529	2.70525	PDGFRB
amino sugar metabolic process (GO:0006040)	1/10	0.346911	0.88984	0	0	2.55529	2.70525	EXTL2
regulation of coagulation (GO:0050818)	1/10	0.346911	0.88984	0	0	2.55529	2.70525	F2
regulation of Arp2/3 complex-mediated actin nucleation (GO:0034315)	1/10	0.346911	0.88984	0	0	2.55529	2.70525	ARFIP1
oxalate transport (GO:0019532)	1/10	0.346911	0.88984	0	0	2.55529	2.70525	SLC26A8
cellular biogenic amine metabolic process (GO:0006576)	1/10	0.346911	0.88984	0	0	2.55529	2.70525	SULT1B1
skeletal muscle thin filament assembly (GO:0030240)	1/10	0.346911	0.88984	0	0	2.55529	2.70525	MYOM2
galactose metabolic process (GO:0006012)	1/10	0.346911	0.88984	0	0	2.55529	2.70525	GALK1
L-glutamate transport (GO:0015813)	1/10	0.346911	0.88984	0	0	2.55529	2.70525	SLC1A3
muscle cell migration (GO:0014812)	1/10	0.346911	0.88984	0	0	2.55529	2.70525	THBS4
regulation of NLRP3 inflammasome complex assembly (GO:1900225)	1/10	0.346911	0.88984	0	0	2.55529	2.70525	CD36
regulation of actin filament-based movement (GO:1903115)	1/10	0.346911	0.88984	0	0	2.55529	2.70525	SCN5A
negative regulation of inclusion body assembly (GO:0090084)	1/10	0.346911	0.88984	0	0	2.55529	2.70525	HSPA1A
cell-cell junction maintenance (GO:0045217)	1/10	0.346911	0.88984	0	0	2.55529	2.70525	CSF1R
epithelial cell morphogenesis (GO:0003382)	1/10	0.346911	0.88984	0	0	2.55529	2.70525	POF1B
creatine metabolic process (GO:0006600)	1/10	0.346911	0.88984	0	0	2.55529	2.70525	CKMT2
androgen biosynthetic process (GO:0006702)	1/10	0.346911	0.88984	0	0	2.55529	2.70525	CYP17A1
mitotic G1 DNA damage checkpoint (GO:0031571)	1/10	0.346911	0.88984	0	0	2.55529	2.70525	TP63
positive regulation of natural killer cell activation (GO:0032816)	1/10	0.346911	0.88984	0	0	2.55529	2.70525	IL23R
telomere maintenance in response to DNA damage (GO:0043247)	1/10	0.346911	0.88984	0	0	2.55529	2.70525	INSL6
glycerolipid metabolic process (GO:0046486)	1/10	0.346911	0.88984	0	0	2.55529	2.70525	DGKG
positive regulation of T cell apoptotic process (GO:0070234)	1/10	0.346911	0.88984	0	0	2.55529	2.70525	IDO1
negative regulation of B cell proliferation (GO:0030889)	1/10	0.346911	0.88984	0	0	2.55529	2.70525	MNDA
actin filament depolymerization (GO:0030042)	1/10	0.346911	0.88984	0	0	2.55529	2.70525	MICAL2
negative regulation of autophagosome assembly (GO:1902902)	1/10	0.346911	0.88984	0	0	2.55529	2.70525	LRRK2
primary alcohol catabolic process (GO:0034310)	1/10	0.346911	0.88984	0	0	2.55529	2.70525	SULT1B1
negative regulation of interleukin-1 beta secretion (GO:0050713)	1/10	0.346911	0.88984	0	0	2.55529	2.70525	CARD8
G1 DNA damage checkpoint (GO:0044783)	1/10	0.346911	0.88984	0	0	2.55529	2.70525	TP63
endosomal vesicle fusion (GO:0034058)	1/10	0.346911	0.88984	0	0	2.55529	2.70525	SAMD9L
mitochondrial respiratory chain complex III biogenesis (GO:0097033)	1/10	0.346911	0.88984	0	0	2.55529	2.70525	UQCC2
negative regulation of lipopolysaccharide-mediated signaling pathway (GO:0031665)	1/10	0.346911	0.88984	0	0	2.55529	2.70525	CARD8
regulation of fatty acid beta-oxidation (GO:0031998)	1/10	0.346911	0.88984	0	0	2.55529	2.70525	ABCD2
nuclear mRNA surveillance (GO:0071028)	1/10	0.346911	0.88984	0	0	2.55529	2.70525	EXOSC5
positive regulation of circadian rhythm (GO:0042753)	1/10	0.346911	0.88984	0	0	2.55529	2.70525	NKX2-1
detection of bacterium (GO:0016045)	1/10	0.346911	0.88984	0	0	2.55529	2.70525	NLRC4
protein-cofactor linkage (GO:0018065)	1/10	0.346911	0.88984	0	0	2.55529	2.70525	POP5
positive regulation of smooth muscle cell migration (GO:0014911)	1/10	0.346911	0.88984	0	0	2.55529	2.70525	PDGFRB
negative regulation of centrosome duplication (GO:0010826)	1/10	0.346911	0.88984	0	0	2.55529	2.70525	BRCA1
protein localization to mitochondrion (GO:0070585)	1/10	0.346911	0.88984	0	0	2.55529	2.70525	LRRK2
regulation of podosome assembly (GO:0071801)	1/10	0.346911	0.88984	0	0	2.55529	2.70525	HCK
neuron projection fasciculation (GO:0106030)	1/10	0.346911	0.88984	0	0	2.55529	2.70525	EPHB2
actin filament-based transport (GO:0099515)	1/10	0.346911	0.88984	0	0	2.55529	2.70525	MYRIP
negative regulation of transcription from RNA polymerase II promoter in response to stress (GO:0097201)	1/10	0.346911	0.88984	0	0	2.55529	2.70525	HSPA1A
coenzyme A metabolic process (GO:0015936)	1/10	0.346911	0.88984	0	0	2.55529	2.70525	NUDT7
regulation of mitochondrial depolarization (GO:0051900)	1/10	0.346911	0.88984	0	0	2.55529	2.70525	LRRK2
glucocorticoid metabolic process (GO:0008211)	1/10	0.346911	0.88984	0	0	2.55529	2.70525	CYP17A1
regulation of astrocyte differentiation (GO:0048710)	1/10	0.346911	0.88984	0	0	2.55529	2.70525	F2
negative regulation of protein autophosphorylation (GO:0031953)	1/10	0.346911	0.88984	0	0	2.55529	2.70525	NLRP12
mitotic G1/S transition checkpoint (GO:0044819)	1/10	0.346911	0.88984	0	0	2.55529	2.70525	TP63
positive regulation of lipid localization (GO:1905954)	1/10	0.346911	0.88984	0	0	2.55529	2.70525	IKBKE
cellular response to leucine starvation (GO:1990253)	1/10	0.346911	0.88984	0	0	2.55529	2.70525	LARS
regulation of immunoglobulin production (GO:0002637)	1/10	0.346911	0.88984	0	0	2.55529	2.70525	FCRL3
glucocorticoid biosynthetic process (GO:0006704)	1/10	0.346911	0.88984	0	0	2.55529	2.70525	CYP17A1
negative regulation of homotypic cell-cell adhesion (GO:0034111)	1/10	0.346911	0.88984	0	0	2.55529	2.70525	CEACAM1
endothelial tube morphogenesis (GO:0061154)	1/10	0.346911	0.88984	0	0	2.55529	2.70525	ACVRL1
regulation of dendritic cell apoptotic process (GO:2000668)	1/10	0.346911	0.88984	0	0	2.55529	2.70525	LILRB1
quinone metabolic process (GO:1901661)	1/10	0.346911	0.88984	0	0	2.55529	2.70525	ADH4
regulation of lysosomal lumen pH (GO:0035751)	1/10	0.346911	0.88984	0	0	2.55529	2.70525	LRRK2
regulation of plasminogen activation (GO:0010755)	1/10	0.346911	0.88984	0	0	2.55529	2.70525	CLEC3B
positive regulation of nuclease activity (GO:0032075)	1/10	0.346911	0.88984	0	0	2.55529	2.70525	HSPA1A
regulation of T cell apoptotic process (GO:0070232)	1/10	0.346911	0.88984	0	0	2.55529	2.70525	IDO1
protein prenylation (GO:0018342)	1/10	0.346911	0.88984	0	0	2.55529	2.70525	CHM
cell-cell junction organization (GO:0045216)	4/72	0.353266	0.88984	0	0	1.35351	1.40837	CSF1R;LIM2;CDH12;PVR
lipid biosynthetic process (GO:0008610)	4/72	0.353266	0.88984	0	0	1.35351	1.40837	GUCY2C;LPL;PDSS2;CYP17A1
regulation of neuron death (GO:1901214)	4/72	0.353266	0.88984	0	0	1.35351	1.40837	LRRK2;SIGMAR1;DHCR24;TP63
negative regulation of cysteine-type endopeptidase activity (GO:2000117)	4/72	0.353266	0.88984	0	0	1.35351	1.40837	HGF;CARD8;TNFRSF10C;DHCR24
regulation of fat cell differentiation (GO:0045598)	4/72	0.353266	0.88984	0	0	1.35351	1.40837	GPER1;ASXL2;AAMDC;CMKLR1
skin development (GO:0043588)	5/94	0.355073	0.88984	0	0	1.29281	1.33862	ITGA3;COL5A3;TMEM79;DHCR24;TP63
negative regulation of cation channel activity (GO:2001258)	2/30	0.357668	0.88984	0	0	1.64303	1.68928	KCNE3;EPHB2
cellular response to drug (GO:0035690)	2/30	0.357668	0.88984	0	0	1.64303	1.68928	KCNH2;AIM2
cyclic purine nucleotide metabolic process (GO:0052652)	2/30	0.357668	0.88984	0	0	1.64303	1.68928	GUCY2C;GUCY2D
regulation of cell adhesion mediated by integrin (GO:0033628)	2/30	0.357668	0.88984	0	0	1.64303	1.68928	DPP4;CYP1B1
'de novo' posttranslational protein folding (GO:0051084)	2/30	0.357668	0.88984	0	0	1.64303	1.68928	HSPA7;HSPA1A
positive regulation of cation channel activity (GO:2001259)	2/30	0.357668	0.88984	0	0	1.64303	1.68928	STAC3;EPHB2
regulation of intracellular estrogen receptor signaling pathway (GO:0033146)	2/30	0.357668	0.88984	0	0	1.64303	1.68928	BRCA1;ZNF366
artery morphogenesis (GO:0048844)	2/30	0.357668	0.88984	0	0	1.64303	1.68928	PDGFRB;BMPR1A
regulation of sodium ion transmembrane transport (GO:1902305)	2/30	0.357668	0.88984	0	0	1.64303	1.68928	ATP2B4;SCN5A
carboxylic acid transport (GO:0046942)	3/51	0.358299	0.88984	0	0	1.43788	1.47582	SLC7A8;SLC6A12;SLC1A7
positive regulation of actin filament polymerization (GO:0030838)	3/51	0.358299	0.88984	0	0	1.43788	1.47582	HCK;ALOX15;CDC42EP2
B cell differentiation (GO:0030183)	3/52	0.369782	0.88984	0	0	1.40846	1.40119	FLT3;HDAC9;RAG1
positive regulation of nervous system development (GO:0051962)	3/52	0.369782	0.88984	0	0	1.40846	1.40119	RGS14;GPER1;EPHB2
regulation of cell death (GO:0010941)	5/96	0.371752	0.88984	0	0	1.26427	1.25103	LRRK2;CIDEB;DHCR24;CD36;HSPA1A
ciliary basal body-plasma membrane docking (GO:0097711)	5/96	0.371752	0.88984	0	0	1.26427	1.25103	RPGRIP1L;CEP41;CC2D2A;NINL;CEP89
regulation of G-protein coupled receptor protein signaling pathway (GO:0008277)	4/74	0.372381	0.88984	0	0	1.3147	1.29871	GUCY2D;LRRK2;GPER1;RPGRIP1L
regulation of dendritic spine development (GO:0060998)	2/31	0.37285	0.88984	0	0	1.58629	1.565	ARHGAP44;LRRK2
alpha-amino acid metabolic process (GO:1901605)	2/31	0.37285	0.88984	0	0	1.58629	1.565	CKMT2;KMO
cellular zinc ion homeostasis (GO:0006882)	2/31	0.37285	0.88984	0	0	1.58629	1.565	S100A9;S100A8
positive regulation of insulin secretion (GO:0032024)	2/31	0.37285	0.88984	0	0	1.58629	1.565	GPER1;MYRIP
positive regulation of bone mineralization (GO:0030501)	2/31	0.37285	0.88984	0	0	1.58629	1.565	KL;BMPR1A
formation of extrachromosomal circular DNA (GO:0001325)	1/11	0.374158	0.88984	0	0	2.29964	2.26072	SMARCAL1
positive regulation of endothelial cell apoptotic process (GO:2000353)	1/11	0.374158	0.88984	0	0	2.29964	2.26072	GPER1
L-phenylalanine metabolic process (GO:0006558)	1/11	0.374158	0.88984	0	0	2.29964	2.26072	ASRGL1
sulfate transmembrane transport (GO:1902358)	1/11	0.374158	0.88984	0	0	2.29964	2.26072	SLC26A8
L-phenylalanine catabolic process (GO:0006559)	1/11	0.374158	0.88984	0	0	2.29964	2.26072	ASRGL1
replicative senescence (GO:0090399)	1/11	0.374158	0.88984	0	0	2.29964	2.26072	CHEK2
regulation of histone deacetylation (GO:0031063)	1/11	0.374158	0.88984	0	0	2.29964	2.26072	USP17L2
regulation of lipid kinase activity (GO:0043550)	1/11	0.374158	0.88984	0	0	2.29964	2.26072	F2
mononuclear cell differentiation (GO:1903131)	1/11	0.374158	0.88984	0	0	2.29964	2.26072	CSF1R
regulation of inclusion body assembly (GO:0090083)	1/11	0.374158	0.88984	0	0	2.29964	2.26072	HSPA1A
negative regulation of nuclear division (GO:0051784)	1/11	0.374158	0.88984	0	0	2.29964	2.26072	TOM1L2
regulation of hydrogen peroxide-induced cell death (GO:1903205)	1/11	0.374158	0.88984	0	0	2.29964	2.26072	LRRK2
negative regulation of protein ubiquitination involved in ubiquitin-dependent protein catabolic process (GO:2000059)	1/11	0.374158	0.88984	0	0	2.29964	2.26072	HFE
negative regulation of leukocyte cell-cell adhesion (GO:1903038)	1/11	0.374158	0.88984	0	0	2.29964	2.26072	TNFAIP8L2
carnitine shuttle (GO:0006853)	1/11	0.374158	0.88984	0	0	2.29964	2.26072	SLC25A20
T cell differentiation in thymus (GO:0033077)	1/11	0.374158	0.88984	0	0	2.29964	2.26072	RAG1
positive regulation of receptor biosynthetic process (GO:0010870)	1/11	0.374158	0.88984	0	0	2.29964	2.26072	NR1H3
positive regulation of cytolysis (GO:0045919)	1/11	0.374158	0.88984	0	0	2.29964	2.26072	LILRB1
intrinsic apoptotic signaling pathway in response to oxidative stress (GO:0008631)	1/11	0.374158	0.88984	0	0	2.29964	2.26072	CYP1B1
positive regulation of tumor necrosis factor secretion (GO:1904469)	1/11	0.374158	0.88984	0	0	2.29964	2.26072	DDX58
myosin filament assembly (GO:0031034)	1/11	0.374158	0.88984	0	0	2.29964	2.26072	MYOM2
brain morphogenesis (GO:0048854)	1/11	0.374158	0.88984	0	0	2.29964	2.26072	MKKS
myeloid cell activation involved in immune response (GO:0002275)	1/11	0.374158	0.88984	0	0	2.29964	2.26072	DNASE1
relaxation of cardiac muscle (GO:0055119)	1/11	0.374158	0.88984	0	0	2.29964	2.26072	KCNJ2
internal protein amino acid acetylation (GO:0006475)	1/11	0.374158	0.88984	0	0	2.29964	2.26072	EHHADH
rRNA base methylation (GO:0070475)	1/11	0.374158	0.88984	0	0	2.29964	2.26072	NSUN5P2
mitochondrion distribution (GO:0048311)	1/11	0.374158	0.88984	0	0	2.29964	2.26072	LRRK2
organic cyclic compound catabolic process (GO:1901361)	1/11	0.374158	0.88984	0	0	2.29964	2.26072	CYP3A4
response to axon injury (GO:0048678)	1/11	0.374158	0.88984	0	0	2.29964	2.26072	MORN4
monocyte differentiation (GO:0030224)	1/11	0.374158	0.88984	0	0	2.29964	2.26072	CSF1R
T cell proliferation (GO:0042098)	1/11	0.374158	0.88984	0	0	2.29964	2.26072	LILRB1
renal filtration (GO:0097205)	1/11	0.374158	0.88984	0	0	2.29964	2.26072	ITGA3
negative regulation of cellular senescence (GO:2000773)	1/11	0.374158	0.88984	0	0	2.29964	2.26072	ZKSCAN3
negative regulation of histone acetylation (GO:0035067)	1/11	0.374158	0.88984	0	0	2.29964	2.26072	BRCA1
synaptonemal complex assembly (GO:0007130)	1/11	0.374158	0.88984	0	0	2.29964	2.26072	HORMAD1
cochlea morphogenesis (GO:0090103)	1/11	0.374158	0.88984	0	0	2.29964	2.26072	MYO3B
relaxation of muscle (GO:0090075)	1/11	0.374158	0.88984	0	0	2.29964	2.26072	KCNJ2
macrophage differentiation (GO:0030225)	1/11	0.374158	0.88984	0	0	2.29964	2.26072	CSF1R
negative regulation of receptor binding (GO:1900121)	1/11	0.374158	0.88984	0	0	2.29964	2.26072	HFE
progesterone metabolic process (GO:0042448)	1/11	0.374158	0.88984	0	0	2.29964	2.26072	CYP17A1
positive regulation of fatty acid biosynthetic process (GO:0045723)	1/11	0.374158	0.88984	0	0	2.29964	2.26072	NR1H3
cell part morphogenesis (GO:0032990)	1/11	0.374158	0.88984	0	0	2.29964	2.26072	C21ORF59
positive regulation of chondrocyte differentiation (GO:0032332)	1/11	0.374158	0.88984	0	0	2.29964	2.26072	ACVRL1
negative regulation of potassium ion transport (GO:0043267)	1/11	0.374158	0.88984	0	0	2.29964	2.26072	KCNH2
phosphate ion homeostasis (GO:0055062)	1/11	0.374158	0.88984	0	0	2.29964	2.26072	GCM2
fatty acid transmembrane transport (GO:1902001)	1/11	0.374158	0.88984	0	0	2.29964	2.26072	SLC25A20
t-circle formation (GO:0090656)	1/11	0.374158	0.88984	0	0	2.29964	2.26072	SMARCAL1
negative regulation of cardiac muscle hypertrophy (GO:0010614)	1/11	0.374158	0.88984	0	0	2.29964	2.26072	ATP2B4
regulation of synaptic vesicle cycle (GO:0098693)	1/11	0.374158	0.88984	0	0	2.29964	2.26072	LRRK2
retinal metabolic process (GO:0042574)	1/11	0.374158	0.88984	0	0	2.29964	2.26072	CYP1B1
positive regulation of fatty acid oxidation (GO:0046321)	1/11	0.374158	0.88984	0	0	2.29964	2.26072	ABCD2
inhibition of cysteine-type endopeptidase activity involved in apoptotic process (GO:1990001)	1/11	0.374158	0.88984	0	0	2.29964	2.26072	NLRC4
positive regulation of sodium ion transmembrane transporter activity (GO:2000651)	1/11	0.374158	0.88984	0	0	2.29964	2.26072	WNK3
epithelial cell-cell adhesion (GO:0090136)	1/11	0.374158	0.88984	0	0	2.29964	2.26072	THBS4
protein O-linked mannosylation (GO:0035269)	1/11	0.374158	0.88984	0	0	2.29964	2.26072	FKTN
carbohydrate derivative catabolic process (GO:1901136)	1/11	0.374158	0.88984	0	0	2.29964	2.26072	SAMHD1
erythrose 4-phosphate/phosphoenolpyruvate family amino acid catabolic process (GO:1902222)	1/11	0.374158	0.88984	0	0	2.29964	2.26072	ASRGL1
telomere maintenance via telomere trimming (GO:0090737)	1/11	0.374158	0.88984	0	0	2.29964	2.26072	SMARCAL1
regulation of receptor biosynthetic process (GO:0010869)	1/11	0.374158	0.88984	0	0	2.29964	2.26072	NR1H3
protein carboxylation (GO:0018214)	1/11	0.374158	0.88984	0	0	2.29964	2.26072	F2
peptidyl-glutamic acid carboxylation (GO:0017187)	1/11	0.374158	0.88984	0	0	2.29964	2.26072	F2
urate metabolic process (GO:0046415)	1/11	0.374158	0.88984	0	0	2.29964	2.26072	SLC2A9
synaptonemal complex organization (GO:0070193)	1/11	0.374158	0.88984	0	0	2.29964	2.26072	HORMAD1
alcohol catabolic process (GO:0046164)	1/11	0.374158	0.88984	0	0	2.29964	2.26072	ADH4
UDP-N-acetylglucosamine biosynthetic process (GO:0006048)	1/11	0.374158	0.88984	0	0	2.29964	2.26072	NAGK
hepatocyte growth factor receptor signaling pathway (GO:0048012)	1/11	0.374158	0.88984	0	0	2.29964	2.26072	HGF
cell-cell adhesion via plasma-membrane adhesion molecules (GO:0098742)	7/142	0.380706	0.894274	0	0	1.19322	1.15233	CLDN20;CEACAM1;SELL;CDH12;FAT2;PVR;MPZL2
neutrophil chemotaxis (GO:0030593)	3/53	0.381228	0.894274	0	0	1.38022	1.33102	CXCR2;S100A9;S100A8
monocarboxylic acid transport (GO:0015718)	3/53	0.381228	0.894274	0	0	1.38022	1.33102	CEACAM1;ATP8B1;SLCO2B1
positive regulation of protein import into nucleus (GO:0042307)	3/53	0.381228	0.894274	0	0	1.38022	1.33102	DDX58;F2;BMPR1A
positive regulation of tyrosine phosphorylation of STAT protein (GO:0042531)	3/53	0.381228	0.894274	0	0	1.38022	1.33102	CSF1R;FLT3;IL23R
regulation of actin cytoskeleton organization (GO:0032956)	4/75	0.381925	0.894274	0	0	1.29611	1.24755	ARHGAP44;PDGFRB;CSF1R;TRPM2
regulation of defense response (GO:0031347)	4/75	0.381925	0.894274	0	0	1.29611	1.24755	HCK;NLRP12;CASP5;SAMHD1
cAMP-mediated signaling (GO:0019933)	4/75	0.381925	0.894274	0	0	1.29611	1.24755	PTGFR;GPER1;TSHR;PTGDR
receptor-mediated endocytosis (GO:0006898)	9/188	0.384434	0.894274	0	0	1.15716	1.10622	CD163;CXCR1;CLTCL1;MRC1;CXCR2;AP1S1;LILRB1;CD36;FCGR1B
actin filament organization (GO:0007015)	6/120	0.384708	0.894274	0	0	1.21103	1.15687	TMOD1;POF1B;TMOD2;CDC42EP2;SHROOM1;MYOM2
regulation of potassium ion transmembrane transport (GO:1901379)	2/32	0.387884	0.894274	0	0	1.53333	1.45214	KCNH2;KCNE3
negative regulation of receptor activity (GO:2000272)	2/32	0.387884	0.894274	0	0	1.53333	1.45214	HFE;EPHB2
phagosome maturation (GO:0090382)	2/32	0.387884	0.894274	0	0	1.53333	1.45214	RAB39A;ATP6V1E2
purine ribonucleoside triphosphate metabolic process (GO:0009205)	2/32	0.387884	0.894274	0	0	1.53333	1.45214	LRRK2;HSPA1A
regulation of cell-cell adhesion (GO:0022407)	2/32	0.387884	0.894274	0	0	1.53333	1.45214	DPP4;CEACAM1
positive regulation of T cell differentiation (GO:0045582)	2/32	0.387884	0.894274	0	0	1.53333	1.45214	IL23R;HLA-G
regulation of nitric oxide biosynthetic process (GO:0045428)	2/32	0.387884	0.894274	0	0	1.53333	1.45214	ATP2B4;CD36
vasculogenesis (GO:0001570)	2/32	0.387884	0.894274	0	0	1.53333	1.45214	PDGFRB;SPRED1
positive regulation of JNK cascade (GO:0046330)	4/76	0.391452	0.894274	0	0	1.27805	1.19867	NCF1;SEMA3A;CARD9;SASH1
positive regulation of apoptotic signaling pathway (GO:2001235)	4/76	0.391452	0.894274	0	0	1.27805	1.19867	GPER1;CIDEB;S100A9;S100A8
RNA modification (GO:0009451)	3/54	0.392626	0.894274	0	0	1.35308	1.26499	NSUN5P2;MRM1;C9ORF64
protein homooligomerization (GO:0051260)	9/190	0.39637	0.894274	0	0	1.14425	1.0589	TRPA1;SIGMAR1;ANXA6;NLRC4;SAMHD1;IKBKE;TP63;KCNJ2;DISP1
glycosaminoglycan biosynthetic process (GO:0006024)	5/99	0.396763	0.894274	0	0	1.22373	1.13123	UGDH;GLCE;ABCC5;GPC1;UST
positive regulation of lyase activity (GO:0051349)	1/12	0.40027	0.894274	0	0	2.09047	1.91407	TSHR
regulation of double-strand break repair via nonhomologous end joining (GO:2001032)	1/12	0.40027	0.894274	0	0	2.09047	1.91407	INSL6
cardiac right ventricle morphogenesis (GO:0003215)	1/12	0.40027	0.894274	0	0	2.09047	1.91407	BMPR1A
regulation of vasculogenesis (GO:2001212)	1/12	0.40027	0.894274	0	0	2.09047	1.91407	CEACAM1
axonal fasciculation (GO:0007413)	1/12	0.40027	0.894274	0	0	2.09047	1.91407	EPHB2
signal transduction involved in G2 DNA damage checkpoint (GO:0072425)	1/12	0.40027	0.894274	0	0	2.09047	1.91407	BRCA1
histone H3-K9 demethylation (GO:0033169)	1/12	0.40027	0.894274	0	0	2.09047	1.91407	KDM4E
positive regulation of interleukin-1 production (GO:0032732)	1/12	0.40027	0.894274	0	0	2.09047	1.91407	AIM2
regulation of protein glycosylation (GO:0060049)	1/12	0.40027	0.894274	0	0	2.09047	1.91407	FKTN
skeletal myofibril assembly (GO:0014866)	1/12	0.40027	0.894274	0	0	2.09047	1.91407	MYOM2
negative regulation of metabolic process (GO:0009892)	1/12	0.40027	0.894274	0	0	2.09047	1.91407	GZMA
vesicle budding from membrane (GO:0006900)	1/12	0.40027	0.894274	0	0	2.09047	1.91407	GOLPH3L
negative regulation of oxidoreductase activity (GO:0051354)	1/12	0.40027	0.894274	0	0	2.09047	1.91407	GZMA
amino sugar biosynthetic process (GO:0046349)	1/12	0.40027	0.894274	0	0	2.09047	1.91407	NAGK
regulation of cytokine biosynthetic process (GO:0042035)	1/12	0.40027	0.894274	0	0	2.09047	1.91407	NLRP12
viral RNA genome replication (GO:0039694)	1/12	0.40027	0.894274	0	0	2.09047	1.91407	ATG16L2
UDP-N-acetylglucosamine metabolic process (GO:0006047)	1/12	0.40027	0.894274	0	0	2.09047	1.91407	NAGK
positive regulation of skeletal muscle tissue development (GO:0048643)	1/12	0.40027	0.894274	0	0	2.09047	1.91407	GPC1
lysine catabolic process (GO:0006554)	1/12	0.40027	0.894274	0	0	2.09047	1.91407	OGDH
regulation of cholesterol homeostasis (GO:2000188)	1/12	0.40027	0.894274	0	0	2.09047	1.91407	NR1H3
regulation of bone remodeling (GO:0046850)	1/12	0.40027	0.894274	0	0	2.09047	1.91407	CSF1R
DNA ligation involved in DNA repair (GO:0051103)	1/12	0.40027	0.894274	0	0	2.09047	1.91407	XRCC4
response to prostaglandin E (GO:0034695)	1/12	0.40027	0.894274	0	0	2.09047	1.91407	PTGDR
histone H3 deacetylation (GO:0070932)	1/12	0.40027	0.894274	0	0	2.09047	1.91407	HDAC9
positive regulation of pseudopodium assembly (GO:0031274)	1/12	0.40027	0.894274	0	0	2.09047	1.91407	CDC42EP2
lysine metabolic process (GO:0006553)	1/12	0.40027	0.894274	0	0	2.09047	1.91407	OGDH
activation of cysteine-type endopeptidase activity (GO:0097202)	1/12	0.40027	0.894274	0	0	2.09047	1.91407	CIDEB
regulation of pseudopodium assembly (GO:0031272)	1/12	0.40027	0.894274	0	0	2.09047	1.91407	CDC42EP2
regulation of protein import into nucleus, translocation (GO:0033158)	1/12	0.40027	0.894274	0	0	2.09047	1.91407	PARP10
regulation of sequestering of triglyceride (GO:0010889)	1/12	0.40027	0.894274	0	0	2.09047	1.91407	LPL
cardiac muscle fiber development (GO:0048739)	1/12	0.40027	0.894274	0	0	2.09047	1.91407	MYOM2
aromatic compound biosynthetic process (GO:0019438)	1/12	0.40027	0.894274	0	0	2.09047	1.91407	PNPO
regulation of blood vessel size (GO:0050880)	1/12	0.40027	0.894274	0	0	2.09047	1.91407	UTS2
positive regulation of cyclase activity (GO:0031281)	1/12	0.40027	0.894274	0	0	2.09047	1.91407	TSHR
regulation of antigen receptor-mediated signaling pathway (GO:0050854)	1/12	0.40027	0.894274	0	0	2.09047	1.91407	GCSAM
prostanoid metabolic process (GO:0006692)	1/12	0.40027	0.894274	0	0	2.09047	1.91407	PTGR2
endosome transport via multivesicular body sorting pathway (GO:0032509)	1/12	0.40027	0.894274	0	0	2.09047	1.91407	LYST
positive regulation of mRNA metabolic process (GO:1903313)	1/12	0.40027	0.894274	0	0	2.09047	1.91407	PRR5L
negative regulation of fibroblast growth factor receptor signaling pathway (GO:0040037)	1/12	0.40027	0.894274	0	0	2.09047	1.91407	GPC1
dermatan sulfate biosynthetic process (GO:0030208)	1/12	0.40027	0.894274	0	0	2.09047	1.91407	UST
DNA deamination (GO:0045006)	1/12	0.40027	0.894274	0	0	2.09047	1.91407	EXOSC5
positive regulation of neuron migration (GO:2001224)	1/12	0.40027	0.894274	0	0	2.09047	1.91407	SEMA3A
regulation of catabolic process (GO:0009894)	1/12	0.40027	0.894274	0	0	2.09047	1.91407	CHEK2
positive regulation of SMAD protein import into nucleus (GO:0060391)	1/12	0.40027	0.894274	0	0	2.09047	1.91407	BMPR1A
intracellular pH reduction (GO:0051452)	2/33	0.402756	0.894973	0	0	1.48379	1.3494	RAB39A;ATP6V1E2
positive regulation of intrinsic apoptotic signaling pathway (GO:2001244)	2/33	0.402756	0.894973	0	0	1.48379	1.3494	S100A9;S100A8
positive regulation of biomineral tissue development (GO:0070169)	2/33	0.402756	0.894973	0	0	1.48379	1.3494	KL;BMPR1A
regulation of phosphatidylinositol 3-kinase activity (GO:0043551)	2/33	0.402756	0.894973	0	0	1.48379	1.3494	PDGFRB;FLT3
positive regulation of Notch signaling pathway (GO:0045747)	2/33	0.402756	0.894973	0	0	1.48379	1.3494	BMP2K;TP63
positive regulation of locomotion (GO:0040017)	2/33	0.402756	0.894973	0	0	1.48379	1.3494	PDGFRB;CSF1R
regulation of cellular catabolic process (GO:0031329)	3/55	0.40397	0.89606	0	0	1.32699	1.2028	TMEM150B;LRRK2;TMEM150C
fat cell differentiation (GO:0045444)	3/55	0.40397	0.89606	0	0	1.32699	1.2028	MKKS;STEAP4;WNT5B
cellular calcium ion homeostasis (GO:0006874)	6/123	0.407187	0.898913	0	0	1.1798	1.06003	GCM2;CALB1;GPER1;ATP2B4;F2;CCR2
positive regulation of sequence-specific DNA binding transcription factor activity (GO:0051091)	10/215	0.40787	0.898913	0	0	1.12248	1.00665	AIM2;FZD4;TRIM5;DDX58;CD36;NLRC4;S100A9;S100A8;HSPA1A;TRIM34
adenylate cyclase-activating G-protein coupled receptor signaling pathway (GO:0007189)	4/78	0.410436	0.898913	0	0	1.24337	1.10727	PTGFR;GPER1;TSHR;PTGDR
regulation of kinase activity (GO:0043549)	5/101	0.413388	0.898913	0	0	1.19811	1.05837	PDGFRB;CSF1R;FLT3;EPHB2;MERTK
granulocyte chemotaxis (GO:0071621)	3/56	0.415252	0.898913	0	0	1.30189	1.14419	CXCR2;S100A9;S100A8
organonitrogen compound catabolic process (GO:1901565)	3/56	0.415252	0.898913	0	0	1.30189	1.14419	CYP3A4;PGA3;PGA5
negative regulation of cellular catabolic process (GO:0031330)	3/56	0.415252	0.898913	0	0	1.30189	1.14419	LARS;HGF;ZKSCAN3
epithelial tube morphogenesis (GO:0060562)	2/34	0.417454	0.898913	0	0	1.43735	1.25564	ACVRL1;CSF1R
macromolecule catabolic process (GO:0009057)	2/34	0.417454	0.898913	0	0	1.43735	1.25564	PGA3;PGA5
response to calcium ion (GO:0051592)	4/79	0.419883	0.898913	0	0	1.22673	1.06453	TRPM2;ALOX15;SCN5A;KCNH1
dermatan sulfate metabolic process (GO:0030205)	1/13	0.425294	0.898913	0	0	1.91617	1.63828	UST
response to iron ion (GO:0010039)	1/13	0.425294	0.898913	0	0	1.91617	1.63828	HFE
regulation of interleukin-1 beta production (GO:0032651)	1/13	0.425294	0.898913	0	0	1.91617	1.63828	AIM2
positive regulation of histone H3-K4 methylation (GO:0051571)	1/13	0.425294	0.898913	0	0	1.91617	1.63828	BRCA1
negative regulation of macrophage derived foam cell differentiation (GO:0010745)	1/13	0.425294	0.898913	0	0	1.91617	1.63828	NR1H3
signal transduction involved in DNA damage checkpoint (GO:0072422)	1/13	0.425294	0.898913	0	0	1.91617	1.63828	BRCA1
cellular response to exogenous dsRNA (GO:0071360)	1/13	0.425294	0.898913	0	0	1.91617	1.63828	DDX58
regulation of lymphocyte activation (GO:0051249)	1/13	0.425294	0.898913	0	0	1.91617	1.63828	FCRL3
positive regulation of cardiac muscle cell proliferation (GO:0060045)	1/13	0.425294	0.898913	0	0	1.91617	1.63828	BMPR1A
intestinal absorption (GO:0050892)	1/13	0.425294	0.898913	0	0	1.91617	1.63828	CD36
glycerolipid catabolic process (GO:0046503)	1/13	0.425294	0.898913	0	0	1.91617	1.63828	PLA2G4C
regulation of NMDA receptor activity (GO:2000310)	1/13	0.425294	0.898913	0	0	1.91617	1.63828	EPHB2
steroid catabolic process (GO:0006706)	1/13	0.425294	0.898913	0	0	1.91617	1.63828	CYP3A4
striated muscle myosin thick filament assembly (GO:0071688)	1/13	0.425294	0.898913	0	0	1.91617	1.63828	MYOM2
regulation of DNA-templated transcription in response to stress (GO:0043620)	1/13	0.425294	0.898913	0	0	1.91617	1.63828	RGS14
regulation of biomineral tissue development (GO:0070167)	1/13	0.425294	0.898913	0	0	1.91617	1.63828	BMP2K
tricarboxylic acid metabolic process (GO:0072350)	1/13	0.425294	0.898913	0	0	1.91617	1.63828	IDH1
positive regulation of cholesterol efflux (GO:0010875)	1/13	0.425294	0.898913	0	0	1.91617	1.63828	NR1H3
regulation of axon guidance (GO:1902667)	1/13	0.425294	0.898913	0	0	1.91617	1.63828	SEMA3A
regulation of macrophage differentiation (GO:0045649)	1/13	0.425294	0.898913	0	0	1.91617	1.63828	C1QC
alpha-linolenic acid metabolic process (GO:0036109)	1/13	0.425294	0.898913	0	0	1.91617	1.63828	HSD17B4
cellular potassium ion homeostasis (GO:0030007)	1/13	0.425294	0.898913	0	0	1.91617	1.63828	KCNJ2
regulation of cAMP metabolic process (GO:0030814)	1/13	0.425294	0.898913	0	0	1.91617	1.63828	CXCL10
cardiocyte differentiation (GO:0035051)	1/13	0.425294	0.898913	0	0	1.91617	1.63828	SIK1
B cell activation involved in immune response (GO:0002312)	1/13	0.425294	0.898913	0	0	1.91617	1.63828	GAPT
negative regulation of viral release from host cell (GO:1902187)	1/13	0.425294	0.898913	0	0	1.91617	1.63828	TRIM5
sensory perception of taste (GO:0050909)	1/13	0.425294	0.898913	0	0	1.91617	1.63828	CD36
positive regulation of muscle contraction (GO:0045933)	1/13	0.425294	0.898913	0	0	1.91617	1.63828	TACR1
negative regulation of reactive oxygen species biosynthetic process (GO:1903427)	1/13	0.425294	0.898913	0	0	1.91617	1.63828	ATP2B4
motile cilium assembly (GO:0044458)	1/13	0.425294	0.898913	0	0	1.91617	1.63828	MSS51
regulation of oxidoreductase activity (GO:0051341)	1/13	0.425294	0.898913	0	0	1.91617	1.63828	GZMA
triglyceride-rich lipoprotein particle remodeling (GO:0034370)	1/13	0.425294	0.898913	0	0	1.91617	1.63828	LPL
mammary gland epithelium development (GO:0061180)	1/13	0.425294	0.898913	0	0	1.91617	1.63828	CSF1R
regulation of cAMP-dependent protein kinase activity (GO:2000479)	1/13	0.425294	0.898913	0	0	1.91617	1.63828	ATP2B4
diacylglycerol metabolic process (GO:0046339)	1/13	0.425294	0.898913	0	0	1.91617	1.63828	DGKK
semaphorin-plexin signaling pathway involved in neuron projection guidance (GO:1902285)	1/13	0.425294	0.898913	0	0	1.91617	1.63828	SEMA3A
regulation of T cell cytokine production (GO:0002724)	1/13	0.425294	0.898913	0	0	1.91617	1.63828	HFE
positive regulation of alpha-beta T cell proliferation (GO:0046641)	1/13	0.425294	0.898913	0	0	1.91617	1.63828	CCR2
regulation of cytolysis (GO:0042268)	1/13	0.425294	0.898913	0	0	1.91617	1.63828	LILRB1
endothelial cell differentiation (GO:0045446)	1/13	0.425294	0.898913	0	0	1.91617	1.63828	ACVRL1
response to fatty acid (GO:0070542)	1/13	0.425294	0.898913	0	0	1.91617	1.63828	CD36
mitotic DNA integrity checkpoint (GO:0044774)	1/13	0.425294	0.898913	0	0	1.91617	1.63828	CHEK2
regulation of synaptic vesicle transport (GO:1902803)	1/13	0.425294	0.898913	0	0	1.91617	1.63828	LRRK2
positive regulation of cell death (GO:0010942)	3/57	0.426464	0.898913	0	0	1.27771	1.0889	LRRK2;CIDEB;CD36
regulation of neurogenesis (GO:0050767)	3/57	0.426464	0.898913	0	0	1.27771	1.0889	RGS14;LRRK2;GPER1
positive regulation of stress-activated MAPK cascade (GO:0032874)	4/80	0.429294	0.898913	0	0	1.21053	1.02364	NCF1;SEMA3A;CARD9;SASH1
negative regulation of MAPK cascade (GO:0043409)	4/80	0.429294	0.898913	0	0	1.21053	1.02364	SPRED1;RGS14;GPER1;EPHB2
positive regulation of peptide secretion (GO:0002793)	2/35	0.431966	0.898913	0	0	1.39372	1.1699	HFE;GOLPH3L
endothelial cell migration (GO:0043542)	2/35	0.431966	0.898913	0	0	1.39372	1.1699	DPP4;CYP1B1
carboxylic acid transmembrane transport (GO:1905039)	2/35	0.431966	0.898913	0	0	1.39372	1.1699	SLC7A8;SLC38A10
carbohydrate catabolic process (GO:0016052)	2/35	0.431966	0.898913	0	0	1.39372	1.1699	HK3;HKDC1
sulfur compound catabolic process (GO:0044273)	2/35	0.431966	0.898913	0	0	1.39372	1.1699	NUDT7;GPC1
phospholipid transport (GO:0015914)	3/58	0.437599	0.898913	0	0	1.25441	1.03671	ATP8B4;ATP8B1;ATP10D
tRNA modification (GO:0006400)	3/58	0.437599	0.898913	0	0	1.25441	1.03671	TRMT10A;RPUSD3;C9ORF64
integrin-mediated signaling pathway (GO:0007229)	3/58	0.437599	0.898913	0	0	1.25441	1.03671	HCK;CEACAM1;ITGA10
neutrophil migration (GO:1990266)	3/58	0.437599	0.898913	0	0	1.25441	1.03671	CXCR2;S100A9;S100A8
positive regulation of vasculature development (GO:1904018)	5/104	0.438185	0.898913	0	0	1.16162	0.958465	CEACAM1;RLN2;CYP1B1;BRCA1;SASH1
protein catabolic process (GO:0030163)	4/81	0.438664	0.898913	0	0	1.19474	0.984493	CEACAM1;CHEK2;PGA3;PGA5
regulation of potassium ion transport (GO:0043266)	2/36	0.446282	0.898913	0	0	1.35266	1.09133	KCNH2;KCNE3
regulation of receptor-mediated endocytosis (GO:0048259)	2/36	0.446282	0.898913	0	0	1.35266	1.09133	HFE;BMP2K
regulation of muscle cell differentiation (GO:0051147)	2/36	0.446282	0.898913	0	0	1.35266	1.09133	HDAC9;CDON
regulation of nitric-oxide synthase activity (GO:0050999)	2/36	0.446282	0.898913	0	0	1.35266	1.09133	SPR;ATP2B4
transferrin transport (GO:0033572)	2/36	0.446282	0.898913	0	0	1.35266	1.09133	HFE;ATP6V1E2
regulation of filopodium assembly (GO:0051489)	2/36	0.446282	0.898913	0	0	1.35266	1.09133	GPM6A;TRPM2
organophosphate biosynthetic process (GO:0090407)	2/36	0.446282	0.898913	0	0	1.35266	1.09133	PNPO;MOCS1
calcium ion transmembrane import into cytosol (GO:0097553)	2/36	0.446282	0.898913	0	0	1.35266	1.09133	TRPM2;ATP2B4
heart looping (GO:0001947)	2/36	0.446282	0.898913	0	0	1.35266	1.09133	MKKS;MICAL2
ferric iron transport (GO:0015682)	2/36	0.446282	0.898913	0	0	1.35266	1.09133	HFE;ATP6V1E2
acylglycerol metabolic process (GO:0006639)	2/36	0.446282	0.898913	0	0	1.35266	1.09133	LPL;DGKK
cardiac muscle contraction (GO:0060048)	2/36	0.446282	0.898913	0	0	1.35266	1.09133	KCNH2;SCN5A
negative regulation of blood coagulation (GO:0030195)	2/36	0.446282	0.898913	0	0	1.35266	1.09133	PLG;F2
regulation of cysteine-type endopeptidase activity (GO:2000116)	2/36	0.446282	0.898913	0	0	1.35266	1.09133	NLRP12;AIM2
positive regulation of protein secretion (GO:0050714)	4/82	0.447989	0.898913	0	0	1.17936	0.947012	GPER1;CLEC6A;GOLPH3L;MYRIP
regulation of pathway-restricted SMAD protein phosphorylation (GO:0060393)	3/59	0.448652	0.898913	0	0	1.23195	0.987418	ACVRL1;HFE;BMPR1A
cell morphogenesis (GO:0000902)	3/59	0.448652	0.898913	0	0	1.23195	0.987418	C21ORF59;CDH12;SHROOM1
neuron cell-cell adhesion (GO:0007158)	1/14	0.449274	0.898913	0	0	1.76868	1.41516	NINJ2
regulation of fibroblast migration (GO:0010762)	1/14	0.449274	0.898913	0	0	1.76868	1.41516	PRR5L
positive regulation of neural precursor cell proliferation (GO:2000179)	1/14	0.449274	0.898913	0	0	1.76868	1.41516	DISC1
acetyl-CoA metabolic process (GO:0006084)	1/14	0.449274	0.898913	0	0	1.76868	1.41516	NUDT7
ubiquinone metabolic process (GO:0006743)	1/14	0.449274	0.898913	0	0	1.76868	1.41516	PDSS2
positive regulation of osteoclast differentiation (GO:0045672)	1/14	0.449274	0.898913	0	0	1.76868	1.41516	IL23R
regulation of lipase activity (GO:0060191)	1/14	0.449274	0.898913	0	0	1.76868	1.41516	LPL
gliogenesis (GO:0042063)	1/14	0.449274	0.898913	0	0	1.76868	1.41516	GCM2
regulation of platelet aggregation (GO:0090330)	1/14	0.449274	0.898913	0	0	1.76868	1.41516	CEACAM1
positive regulation of response to cytokine stimulus (GO:0060760)	1/14	0.449274	0.898913	0	0	1.76868	1.41516	DDX58
regulation of extracellular matrix disassembly (GO:0010715)	1/14	0.449274	0.898913	0	0	1.76868	1.41516	DPP4
negative regulation of interleukin-1 beta production (GO:0032691)	1/14	0.449274	0.898913	0	0	1.76868	1.41516	CARD8
detection of chemical stimulus involved in sensory perception of smell (GO:0050911)	1/14	0.449274	0.898913	0	0	1.76868	1.41516	OR1D5
negative regulation of focal adhesion assembly (GO:0051895)	1/14	0.449274	0.898913	0	0	1.76868	1.41516	ACVRL1
cell surface receptor signaling pathway involved in heart development (GO:0061311)	1/14	0.449274	0.898913	0	0	1.76868	1.41516	BMPR1A
thymus development (GO:0048538)	1/14	0.449274	0.898913	0	0	1.76868	1.41516	AIRE
negative regulation of secretion (GO:0051048)	1/14	0.449274	0.898913	0	0	1.76868	1.41516	NR1H3
copper ion transport (GO:0006825)	1/14	0.449274	0.898913	0	0	1.76868	1.41516	STEAP4
regulation of lymphocyte differentiation (GO:0045619)	1/14	0.449274	0.898913	0	0	1.76868	1.41516	FCRL3
regulation of defense response to virus (GO:0050688)	1/14	0.449274	0.898913	0	0	1.76868	1.41516	USP17L2
regulation of neural precursor cell proliferation (GO:2000177)	1/14	0.449274	0.898913	0	0	1.76868	1.41516	LRRK2
quinone biosynthetic process (GO:1901663)	1/14	0.449274	0.898913	0	0	1.76868	1.41516	PDSS2
positive regulation of DNA damage response, signal transduction by p53 class mediator (GO:0043517)	1/14	0.449274	0.898913	0	0	1.76868	1.41516	SPRED1
oligosaccharide-lipid intermediate biosynthetic process (GO:0006490)	1/14	0.449274	0.898913	0	0	1.76868	1.41516	DPAGT1
DNA modification (GO:0006304)	1/14	0.449274	0.898913	0	0	1.76868	1.41516	EXOSC5
epiboly involved in wound healing (GO:0090505)	1/14	0.449274	0.898913	0	0	1.76868	1.41516	CEACAM1
positive regulation of vascular smooth muscle cell proliferation (GO:1904707)	1/14	0.449274	0.898913	0	0	1.76868	1.41516	BMPR1A
negative regulation of smooth muscle cell migration (GO:0014912)	1/14	0.449274	0.898913	0	0	1.76868	1.41516	BMPR1A
positive regulation of purine nucleotide metabolic process (GO:1900544)	1/14	0.449274	0.898913	0	0	1.76868	1.41516	CXCL10
regulation of protein modification by small protein conjugation or removal (GO:1903320)	1/14	0.449274	0.898913	0	0	1.76868	1.41516	HSPA1A
regulation of interferon-gamma biosynthetic process (GO:0045072)	1/14	0.449274	0.898913	0	0	1.76868	1.41516	LILRB1
positive regulation of transporter activity (GO:0032411)	1/14	0.449274	0.898913	0	0	1.76868	1.41516	WNK3
regulation of mRNA catabolic process (GO:0061013)	1/14	0.449274	0.898913	0	0	1.76868	1.41516	PRR5L
regulation of adaptive immune response (GO:0002819)	1/14	0.449274	0.898913	0	0	1.76868	1.41516	ALOX15
negative regulation of T cell receptor signaling pathway (GO:0050860)	1/14	0.449274	0.898913	0	0	1.76868	1.41516	CEACAM1
negative regulation of cation transmembrane transport (GO:1904063)	1/14	0.449274	0.898913	0	0	1.76868	1.41516	KCNH2
positive regulation of protein phosphorylation (GO:0001934)	18/412	0.453838	0.899375	0	0	1.05099	0.830294	ACVRL1;PDGFRB;CSF1R;FLT3;FCRL3;LRRK2;HFE;HGF;TNFRSF10C;ATP2B4;F2;MERTK;THBS4;TRIM5;GPER1;WNK3;EPHB2;BMPR1A
spermatogenesis (GO:0007283)	7/153	0.455998	0.899375	0	0	1.10268	0.865898	TDRKH;TDRD9;TDRD12;MYCBPAP;HORMAD1;SPA17;PRSS21
generation of neurons (GO:0048699)	6/130	0.45925	0.899375	0	0	1.11279	0.865928	GPM6A;WNT5B;FZD4;SEMA3A;SPOCK1;DISC1
regulation of angiogenesis (GO:0045765)	8/177	0.459264	0.899375	0	0	1.0887	0.847149	SPRED1;CEACAM1;RLN2;CYP1B1;BRCA1;THBS4;SASH1;CCR2
muscle organ development (GO:0007517)	3/60	0.459615	0.899375	0	0	1.21027	0.940825	CXCL10;LAMA2;FKTN
sodium-independent organic anion transport (GO:0043252)	2/37	0.460394	0.899375	0	0	1.31394	1.01919	SLC22A3;SLCO2B1
protein peptidyl-prolyl isomerization (GO:0000413)	2/37	0.460394	0.899375	0	0	1.31394	1.01919	PPIAL4C;PPIAL4E
positive regulation of smooth muscle cell proliferation (GO:0048661)	2/37	0.460394	0.899375	0	0	1.31394	1.01919	PDGFRB;BMPR1A
phospholipid biosynthetic process (GO:0008654)	2/37	0.460394	0.899375	0	0	1.31394	1.01919	DPAGT1;SGMS2
regulation of peptidyl-threonine phosphorylation (GO:0010799)	2/37	0.460394	0.899375	0	0	1.31394	1.01919	SPRED1;WNK3
negative regulation of Ras protein signal transduction (GO:0046580)	2/37	0.460394	0.899375	0	0	1.31394	1.01919	ARHGAP44;EPHB2
response to steroid hormone (GO:0048545)	2/37	0.460394	0.899375	0	0	1.31394	1.01919	PAQR8;NR1H3
positive regulation of multi-organism process (GO:0043902)	2/37	0.460394	0.899375	0	0	1.31394	1.01919	USP17L2;SASH1
regulation of protein secretion (GO:0050708)	5/107	0.462736	0.899375	0	0	1.12727	0.868677	DPP4;UQCC2;GOLPH3L;ARFIP1;DISP1
male gamete generation (GO:0048232)	7/154	0.462777	0.899375	0	0	1.09512	0.843804	TDRKH;TDRD9;TDRD12;MYCBPAP;HORMAD1;SPA17;PRSS21
cellular response to lipid (GO:0071396)	8/178	0.465567	0.899375	0	0	1.08224	0.82737	CXCL10;WNT5B;FZD4;GPER1;DEFA3;NR1H3;LILRB1;DEFA1
response to lipopolysaccharide (GO:0032496)	7/155	0.469536	0.899375	0	0	1.08767	0.822287	CXCL10;IL23R;TNFRSF10C;DEFA3;NR1H3;LILRB1;DEFA1
regulation of tyrosine phosphorylation of STAT protein (GO:0042509)	3/61	0.470484	0.899375	0	0	1.18934	0.896757	CSF1R;FLT3;IL23R
regulation of cytokine production (GO:0001817)	5/108	0.47085	0.899375	0	0	1.11627	0.840792	NLRP12;DDX58;BTN3A3;BTN3A2;CCR2
negative regulation of hydrolase activity (GO:0051346)	5/108	0.47085	0.899375	0	0	1.11627	0.840792	TSKS;SPRED1;SH2D4A;LRRK2;USP17L2
positive regulation of peptidyl-lysine acetylation (GO:2000758)	1/15	0.472256	0.899375	0	0	1.64226	1.23208	BRCA1
myotube differentiation (GO:0014902)	1/15	0.472256	0.899375	0	0	1.64226	1.23208	KCNH1
atrioventricular valve morphogenesis (GO:0003181)	1/15	0.472256	0.899375	0	0	1.64226	1.23208	BMPR1A
pseudouridine synthesis (GO:0001522)	1/15	0.472256	0.899375	0	0	1.64226	1.23208	RPUSD3
regulation of mast cell degranulation (GO:0043304)	1/15	0.472256	0.899375	0	0	1.64226	1.23208	STYK1
ubiquinone biosynthetic process (GO:0006744)	1/15	0.472256	0.899375	0	0	1.64226	1.23208	PDSS2
vitamin D metabolic process (GO:0042359)	1/15	0.472256	0.899375	0	0	1.64226	1.23208	CYP3A4
negative regulation of peptidyl-threonine phosphorylation (GO:0010801)	1/15	0.472256	0.899375	0	0	1.64226	1.23208	SPRED1
heparan sulfate proteoglycan biosynthetic process (GO:0015012)	1/15	0.472256	0.899375	0	0	1.64226	1.23208	GLCE
phosphatidylethanolamine biosynthetic process (GO:0006646)	1/15	0.472256	0.899375	0	0	1.64226	1.23208	ALOX15
negative regulation of adherens junction organization (GO:1903392)	1/15	0.472256	0.899375	0	0	1.64226	1.23208	ACVRL1
regulation of B cell differentiation (GO:0045577)	1/15	0.472256	0.899375	0	0	1.64226	1.23208	FCRL3
autonomic nervous system development (GO:0048483)	1/15	0.472256	0.899375	0	0	1.64226	1.23208	SEMA3A
negative regulation of platelet-derived growth factor receptor signaling pathway (GO:0010642)	1/15	0.472256	0.899375	0	0	1.64226	1.23208	PDGFRB
pyrimidine nucleoside biosynthetic process (GO:0046134)	1/15	0.472256	0.899375	0	0	1.64226	1.23208	DHODH
L-alpha-amino acid transmembrane transport (GO:1902475)	1/15	0.472256	0.899375	0	0	1.64226	1.23208	SLC1A3
positive regulation of stress-activated protein kinase signaling cascade (GO:0070304)	1/15	0.472256	0.899375	0	0	1.64226	1.23208	CARD9
positive regulation of potassium ion transmembrane transport (GO:1901381)	1/15	0.472256	0.899375	0	0	1.64226	1.23208	KCNH2
regulation of tumor necrosis factor secretion (GO:1904467)	1/15	0.472256	0.899375	0	0	1.64226	1.23208	DDX58
intracellular lipid transport (GO:0032365)	1/15	0.472256	0.899375	0	0	1.64226	1.23208	SLC25A20
cardiac muscle cell differentiation (GO:0055007)	1/15	0.472256	0.899375	0	0	1.64226	1.23208	SIK1
glycerophospholipid catabolic process (GO:0046475)	1/15	0.472256	0.899375	0	0	1.64226	1.23208	PLA2G4C
regulation of centriole replication (GO:0046599)	1/15	0.472256	0.899375	0	0	1.64226	1.23208	BRCA1
negative regulation of cell aging (GO:0090344)	1/15	0.472256	0.899375	0	0	1.64226	1.23208	ZKSCAN3
dermatan sulfate proteoglycan biosynthetic process (GO:0050651)	1/15	0.472256	0.899375	0	0	1.64226	1.23208	UST
mitochondrion localization (GO:0051646)	1/15	0.472256	0.899375	0	0	1.64226	1.23208	LRRK2
regulation of clathrin-dependent endocytosis (GO:2000369)	1/15	0.472256	0.899375	0	0	1.64226	1.23208	BMP2K
pyrimidine nucleoside metabolic process (GO:0006213)	1/15	0.472256	0.899375	0	0	1.64226	1.23208	DHODH
nitric oxide mediated signal transduction (GO:0007263)	1/15	0.472256	0.899375	0	0	1.64226	1.23208	CD36
intra-S DNA damage checkpoint (GO:0031573)	1/15	0.472256	0.899375	0	0	1.64226	1.23208	CHEK2
negative regulation of release of cytochrome c from mitochondria (GO:0090201)	1/15	0.472256	0.899375	0	0	1.64226	1.23208	HGF
positive regulation of phosphoprotein phosphatase activity (GO:0032516)	1/15	0.472256	0.899375	0	0	1.64226	1.23208	PDGFRB
regulation of delayed rectifier potassium channel activity (GO:1902259)	1/15	0.472256	0.899375	0	0	1.64226	1.23208	KCNE3
regulation of mitochondrial translation (GO:0070129)	1/15	0.472256	0.899375	0	0	1.64226	1.23208	UQCC2
negative regulation of viral entry into host cell (GO:0046597)	1/15	0.472256	0.899375	0	0	1.64226	1.23208	TRIM5
positive regulation of collagen metabolic process (GO:0010714)	1/15	0.472256	0.899375	0	0	1.64226	1.23208	F2
filopodium assembly (GO:0046847)	1/15	0.472256	0.899375	0	0	1.64226	1.23208	FGD2
positive regulation of double-strand break repair (GO:2000781)	1/15	0.472256	0.899375	0	0	1.64226	1.23208	INSL6
protein O-linked fucosylation (GO:0036066)	1/15	0.472256	0.899375	0	0	1.64226	1.23208	ADAMTS5
positive regulation of collagen biosynthetic process (GO:0032967)	1/15	0.472256	0.899375	0	0	1.64226	1.23208	F2
positive regulation of potassium ion transport (GO:0043268)	1/15	0.472256	0.899375	0	0	1.64226	1.23208	KCNH2
cellular response to corticosteroid stimulus (GO:0071384)	1/15	0.472256	0.899375	0	0	1.64226	1.23208	GPER1
potassium ion import (GO:0010107)	2/38	0.474294	0.899375	0	0	1.27738	0.952832	KCNJ1;KCNJ2
DNA damage checkpoint (GO:0000077)	2/38	0.474294	0.899375	0	0	1.27738	0.952832	CHEK2;INTS7
positive regulation of innate immune response (GO:0045089)	2/38	0.474294	0.899375	0	0	1.27738	0.952832	USP17L2;TLR5
regulation of cellular pH (GO:0030641)	2/38	0.474294	0.899375	0	0	1.27738	0.952832	SLC26A8;SLC4A4
cellular amide metabolic process (GO:0043603)	3/62	0.481253	0.899375	0	0	1.16912	0.855053	NLN;FUT7;NAPEPLD
negative regulation of peptidase activity (GO:0010466)	3/62	0.481253	0.899375	0	0	1.16912	0.855053	SERPINI2;SPOCK1;SERPINI1
regulation of T cell proliferation (GO:0042129)	3/62	0.481253	0.899375	0	0	1.16912	0.855053	IL23R;LILRB1;HLA-G
organonitrogen compound biosynthetic process (GO:1901566)	8/181	0.484379	0.899375	0	0	1.0633	0.770777	DPAGT1;GSTM4;SLC44A5;PCSK1;GSTM1;SPTSSB;SGMS2;MOCS1
calcium ion transmembrane transport (GO:0070588)	4/86	0.484759	0.899375	0	0	1.1216	0.812154	TRPM2;MCOLN3;TRPA1;ATP2B4
toll-like receptor signaling pathway (GO:0002224)	4/86	0.484759	0.899375	0	0	1.1216	0.812154	CD36;TLR5;S100A9;S100A8
transmembrane receptor protein tyrosine kinase signaling pathway (GO:0007169)	17/396	0.486363	0.899375	0	0	1.03144	0.743464	PDGFRB;CSF1R;KL;NCF1;RGS14;FLT3;HGF;ITSN1;STYK1;CYBB;BMX;GFRA2;HCK;SPRED1;ESRP1;EPHB2;ATP6V1E2
regulation of RNA metabolic process (GO:0051252)	2/39	0.487974	0.899375	0	0	1.24279	0.891693	OAS1;ESRP1
Golgi to plasma membrane transport (GO:0006893)	2/39	0.487974	0.899375	0	0	1.24279	0.891693	ARFRP1;GOLPH3L
mitotic DNA damage checkpoint (GO:0044773)	2/39	0.487974	0.899375	0	0	1.24279	0.891693	CHEK2;TP63
axon guidance (GO:0007411)	7/158	0.489682	0.899375	0	0	1.06589	0.761044	DAB1;UNC5A;SEMA3C;SEMA3A;GPC1;EPHB2;GFRA2
negative regulation of dephosphorylation (GO:0035305)	3/63	0.491917	0.899375	0	0	1.14958	0.815562	TSKS;SPRED1;SH2D4A
neural tube development (GO:0021915)	1/16	0.494279	0.899375	0	0	1.53269	1.08002	ARL13B
positive regulation of epithelial cell apoptotic process (GO:1904037)	1/16	0.494279	0.899375	0	0	1.53269	1.08002	GPER1
regulation of actin nucleation (GO:0051125)	1/16	0.494279	0.899375	0	0	1.53269	1.08002	ARFIP1
lipopolysaccharide-mediated signaling pathway (GO:0031663)	1/16	0.494279	0.899375	0	0	1.53269	1.08002	HCK
C21-steroid hormone biosynthetic process (GO:0006700)	1/16	0.494279	0.899375	0	0	1.53269	1.08002	GUCY2C
positive regulation of cardiac muscle tissue growth (GO:0055023)	1/16	0.494279	0.899375	0	0	1.53269	1.08002	BMPR1A
cellular response to dsRNA (GO:0071359)	1/16	0.494279	0.899375	0	0	1.53269	1.08002	DDX58
negative regulation of immune effector process (GO:0002698)	1/16	0.494279	0.899375	0	0	1.53269	1.08002	LILRB1
protein transport along microtubule (GO:0098840)	1/16	0.494279	0.899375	0	0	1.53269	1.08002	IFT27
regulation of dopamine secretion (GO:0014059)	1/16	0.494279	0.899375	0	0	1.53269	1.08002	KCNA2
regulation of toll-like receptor 4 signaling pathway (GO:0034143)	1/16	0.494279	0.899375	0	0	1.53269	1.08002	NR1H3
leukocyte tethering or rolling (GO:0050901)	1/16	0.494279	0.899375	0	0	1.53269	1.08002	SELL
phosphatidylinositol acyl-chain remodeling (GO:0036149)	1/16	0.494279	0.899375	0	0	1.53269	1.08002	PLA2G4C
hyaluronan catabolic process (GO:0030214)	1/16	0.494279	0.899375	0	0	1.53269	1.08002	LYVE1
regulation of RIG-I signaling pathway (GO:0039535)	1/16	0.494279	0.899375	0	0	1.53269	1.08002	USP17L2
regulation of cell cycle phase transition (GO:1901987)	1/16	0.494279	0.899375	0	0	1.53269	1.08002	ATP2B4
regulation of reactive oxygen species biosynthetic process (GO:1903426)	1/16	0.494279	0.899375	0	0	1.53269	1.08002	CD36
cardiac ventricle development (GO:0003231)	1/16	0.494279	0.899375	0	0	1.53269	1.08002	SCN5A
stabilization of membrane potential (GO:0030322)	1/16	0.494279	0.899375	0	0	1.53269	1.08002	KCNK13
sympathetic nervous system development (GO:0048485)	1/16	0.494279	0.899375	0	0	1.53269	1.08002	SEMA3A
regulation of histone H3-K4 methylation (GO:0051569)	1/16	0.494279	0.899375	0	0	1.53269	1.08002	BRCA1
positive regulation of mRNA processing (GO:0050685)	1/16	0.494279	0.899375	0	0	1.53269	1.08002	HSPA1A
leukocyte adhesion to vascular endothelial cell (GO:0061756)	1/16	0.494279	0.899375	0	0	1.53269	1.08002	SELL
guanosine-containing compound metabolic process (GO:1901068)	1/16	0.494279	0.899375	0	0	1.53269	1.08002	LRRK2
regulation of energy homeostasis (GO:2000505)	1/16	0.494279	0.899375	0	0	1.53269	1.08002	CD36
negative regulation of translational initiation (GO:0045947)	1/16	0.494279	0.899375	0	0	1.53269	1.08002	PAIP2B
positive regulation of immune system process (GO:0002684)	1/16	0.494279	0.899375	0	0	1.53269	1.08002	HLA-G
dendritic spine morphogenesis (GO:0060997)	1/16	0.494279	0.899375	0	0	1.53269	1.08002	EPHB2
negative regulation of DNA recombination (GO:0045910)	1/16	0.494279	0.899375	0	0	1.53269	1.08002	INSL6
positive regulation of triglyceride metabolic process (GO:0090208)	1/16	0.494279	0.899375	0	0	1.53269	1.08002	NR1H3
regulation of SMAD protein import into nucleus (GO:0060390)	1/16	0.494279	0.899375	0	0	1.53269	1.08002	BMPR1A
positive regulation of cyclic nucleotide metabolic process (GO:0030801)	1/16	0.494279	0.899375	0	0	1.53269	1.08002	CXCL10
positive regulation of cell migration involved in sprouting angiogenesis (GO:0090050)	1/16	0.494279	0.899375	0	0	1.53269	1.08002	HDAC9
odontogenesis of dentin-containing tooth (GO:0042475)	1/16	0.494279	0.899375	0	0	1.53269	1.08002	SCN5A
regulation of stem cell proliferation (GO:0072091)	1/16	0.494279	0.899375	0	0	1.53269	1.08002	LRRK2
artery development (GO:0060840)	1/16	0.494279	0.899375	0	0	1.53269	1.08002	ACVRL1
ruffle organization (GO:0031529)	1/16	0.494279	0.899375	0	0	1.53269	1.08002	CSF1R
linoleic acid metabolic process (GO:0043651)	1/16	0.494279	0.899375	0	0	1.53269	1.08002	CYP2J2
neurotransmitter transport (GO:0006836)	1/16	0.494279	0.899375	0	0	1.53269	1.08002	SLC1A3
regulation of glucose transport (GO:0010827)	1/16	0.494279	0.899375	0	0	1.53269	1.08002	FFAR4
negative regulation of lipid storage (GO:0010888)	1/16	0.494279	0.899375	0	0	1.53269	1.08002	NR1H3
regulation of interferon-alpha production (GO:0032647)	1/16	0.494279	0.899375	0	0	1.53269	1.08002	DDX58
negative regulation of transport (GO:0051051)	2/40	0.501429	0.899375	0	0	1.21002	0.835269	NR1H3;LILRB1
embryonic heart tube morphogenesis (GO:0003143)	2/40	0.501429	0.899375	0	0	1.21002	0.835269	MKKS;MICAL2
intraciliary transport involved in cilium assembly (GO:0035735)	2/40	0.501429	0.899375	0	0	1.21002	0.835269	IFT27;IFT80
tRNA aminoacylation (GO:0043039)	2/40	0.501429	0.899375	0	0	1.21002	0.835269	LARS;FARS2
peptidyl-proline modification (GO:0018208)	2/40	0.501429	0.899375	0	0	1.21002	0.835269	PPIAL4C;PPIAL4E
negative regulation of cytokine-mediated signaling pathway (GO:0001960)	2/40	0.501429	0.899375	0	0	1.21002	0.835269	CARD8;NR1H3
regulation of intracellular transport (GO:0032386)	2/40	0.501429	0.899375	0	0	1.21002	0.835269	LRRK2;STYK1
determination of heart left/right asymmetry (GO:0061371)	2/40	0.501429	0.899375	0	0	1.21002	0.835269	MKKS;MICAL2
positive regulation of protein polymerization (GO:0032273)	3/64	0.502472	0.899375	0	0	1.13067	0.778147	HCK;ALOX15;CDC42EP2
regulation of proteasomal ubiquitin-dependent protein catabolic process (GO:0032434)	4/88	0.502773	0.899375	0	0	1.09478	0.752788	DET1;HFE;LRRK2;HSPA1A
regulation of protein targeting to mitochondrion (GO:1903214)	4/88	0.502773	0.899375	0	0	1.09478	0.752788	HHAT;LRRK2;TDRD12;RNASE2
positive regulation of phosphorylation (GO:0042327)	9/208	0.503039	0.899375	0	0	1.03976	0.714409	PDGFRB;CSF1R;FLT3;HGF;LRRK2;GPER1;EPHB2;F2;MERTK
O-glycan processing (GO:0016266)	3/65	0.512913	0.899375	0	0	1.11238	0.742678	C1GALT1C1;MUC16;GALNTL6
cellular response to reactive oxygen species (GO:0034614)	3/65	0.512913	0.899375	0	0	1.11238	0.742678	TRPM2;NCF1;CYP1B1
negative regulation of blood vessel morphogenesis (GO:2000181)	3/65	0.512913	0.899375	0	0	1.11238	0.742678	SPRED1;THBS4;CCR2
defense response to Gram-positive bacterium (GO:0050830)	3/65	0.512913	0.899375	0	0	1.11238	0.742678	DEFA3;RNASE3;DEFA1
bicarbonate transport (GO:0015701)	2/41	0.514653	0.899375	0	0	1.17893	0.78312	SLC26A8;SLC4A4
regulation of phagocytosis (GO:0050764)	2/41	0.514653	0.899375	0	0	1.17893	0.78312	HCK;MERTK
peptide transport (GO:0015833)	2/41	0.514653	0.899375	0	0	1.17893	0.78312	LMAN2L;DISP1
calcium-dependent cell-cell adhesion via plasma membrane cell adhesion molecules (GO:0016339)	2/41	0.514653	0.899375	0	0	1.17893	0.78312	SELL;CDH12
negative regulation of cell projection organization (GO:0031345)	2/41	0.514653	0.899375	0	0	1.17893	0.78312	SEMA3A;SPOCK1
cellular response to peptide (GO:1901653)	2/41	0.514653	0.899375	0	0	1.17893	0.78312	GPER1;CD36
negative regulation of STAT cascade (GO:1904893)	2/41	0.514653	0.899375	0	0	1.17893	0.78312	CHAD;LRRC3
regulation of protein localization (GO:0032880)	2/41	0.514653	0.899375	0	0	1.17893	0.78312	TRIM5;DZIP1L
positive regulation of protein processing (GO:0010954)	1/17	0.515384	0.899375	0	0	1.43682	0.952388	CLEC3B
regulation of cellular protein catabolic process (GO:1903362)	1/17	0.515384	0.899375	0	0	1.43682	0.952388	UQCC2
positive regulation of cholesterol transport (GO:0032376)	1/17	0.515384	0.899375	0	0	1.43682	0.952388	NR1H3
positive regulation of lymphocyte migration (GO:2000403)	1/17	0.515384	0.899375	0	0	1.43682	0.952388	CXCL10
positive regulation of interleukin-6 secretion (GO:2000778)	1/17	0.515384	0.899375	0	0	1.43682	0.952388	DDX58
preassembly of GPI anchor in ER membrane (GO:0016254)	1/17	0.515384	0.899375	0	0	1.43682	0.952388	PIGZ
positive regulation of fatty acid metabolic process (GO:0045923)	1/17	0.515384	0.899375	0	0	1.43682	0.952388	NR1H3
regulation of transposition (GO:0010528)	1/17	0.515384	0.899375	0	0	1.43682	0.952388	TDRD9
negative regulation of B cell activation (GO:0050869)	1/17	0.515384	0.899375	0	0	1.43682	0.952388	MNDA
regulation of mitochondrial outer membrane permeabilization involved in apoptotic signaling pathway (GO:1901028)	1/17	0.515384	0.899375	0	0	1.43682	0.952388	HSPA1A
gastrulation (GO:0007369)	1/17	0.515384	0.899375	0	0	1.43682	0.952388	MKKS
protein mannosylation (GO:0035268)	1/17	0.515384	0.899375	0	0	1.43682	0.952388	FKTN
negative regulation of cell development (GO:0010721)	1/17	0.515384	0.899375	0	0	1.43682	0.952388	LILRB1
negative regulation of interleukin-8 production (GO:0032717)	1/17	0.515384	0.899375	0	0	1.43682	0.952388	ANXA4
positive regulation of hormone secretion (GO:0046887)	1/17	0.515384	0.899375	0	0	1.43682	0.952388	HFE
negative regulation of tumor necrosis factor-mediated signaling pathway (GO:0010804)	1/17	0.515384	0.899375	0	0	1.43682	0.952388	CARD8
negative regulation of reactive oxygen species metabolic process (GO:2000378)	1/17	0.515384	0.899375	0	0	1.43682	0.952388	BRCA1
positive regulation of stem cell proliferation (GO:2000648)	1/17	0.515384	0.899375	0	0	1.43682	0.952388	DISC1
negative regulation of intracellular transport (GO:0032387)	1/17	0.515384	0.899375	0	0	1.43682	0.952388	HSPA1A
positive regulation of cellular protein catabolic process (GO:1903364)	1/17	0.515384	0.899375	0	0	1.43682	0.952388	UQCC2
negative regulation of cellular carbohydrate metabolic process (GO:0010677)	1/17	0.515384	0.899375	0	0	1.43682	0.952388	SIK1
rRNA catabolic process (GO:0016075)	1/17	0.515384	0.899375	0	0	1.43682	0.952388	EXOSC5
regulation of collagen biosynthetic process (GO:0032965)	1/17	0.515384	0.899375	0	0	1.43682	0.952388	F2
pharyngeal system development (GO:0060037)	1/17	0.515384	0.899375	0	0	1.43682	0.952388	BMPR1A
embryo development ending in birth or egg hatching (GO:0009792)	1/17	0.515384	0.899375	0	0	1.43682	0.952388	BRCA1
response to purine-containing compound (GO:0014074)	1/17	0.515384	0.899375	0	0	1.43682	0.952388	TRPM2
phospholipid catabolic process (GO:0009395)	1/17	0.515384	0.899375	0	0	1.43682	0.952388	PLA2G4C
positive regulation of calcium ion transmembrane transporter activity (GO:1901021)	1/17	0.515384	0.899375	0	0	1.43682	0.952388	STAC3
positive regulation of signal transduction by p53 class mediator (GO:1901798)	1/17	0.515384	0.899375	0	0	1.43682	0.952388	SPRED1
regulation of synaptic vesicle exocytosis (GO:2000300)	1/17	0.515384	0.899375	0	0	1.43682	0.952388	LRRK2
heterocycle biosynthetic process (GO:0018130)	1/17	0.515384	0.899375	0	0	1.43682	0.952388	MOCS1
nucleotide catabolic process (GO:0009166)	1/17	0.515384	0.899375	0	0	1.43682	0.952388	SAMHD1
chaperone-mediated protein complex assembly (GO:0051131)	1/17	0.515384	0.899375	0	0	1.43682	0.952388	HSPA1A
purine-containing compound metabolic process (GO:0072521)	1/17	0.515384	0.899375	0	0	1.43682	0.952388	SLC2A9
positive regulation of cartilage development (GO:0061036)	1/17	0.515384	0.899375	0	0	1.43682	0.952388	ACVRL1
positive regulation of cation transmembrane transport (GO:1904064)	1/17	0.515384	0.899375	0	0	1.43682	0.952388	KCNH2
cellular monovalent inorganic cation homeostasis (GO:0030004)	1/17	0.515384	0.899375	0	0	1.43682	0.952388	KCNJ2
regulation of vesicle-mediated transport (GO:0060627)	6/138	0.517243	0.901982	0	0	1.04491	0.688846	TBC1D8B;TBCK;RAB40B;LRRK2;BMP2K;RAB40AL
protein tetramerization (GO:0051262)	4/90	0.520506	0.902822	0	0	1.06921	0.698143	TRPA1;SAMHD1;TP63;KCNJ2
regulation of JNK cascade (GO:0046328)	4/90	0.520506	0.902822	0	0	1.06921	0.698143	NCF1;SEMA3A;CARD9;FKTN
purine ribonucleotide metabolic process (GO:0009150)	3/66	0.523237	0.902822	0	0	1.09467	0.709038	SULT1B1;LRRK2;HSPA1A
protein O-linked glycosylation (GO:0006493)	5/115	0.526415	0.902822	0	0	1.04485	0.670444	ADAMTS5;C1GALT1C1;MUC16;GALNTL6;FKTN
cellular response to oxidative stress (GO:0034599)	5/115	0.526415	0.902822	0	0	1.04485	0.670444	NCF1;LRRK2;CYBB;PRR5L;HSPA1A
ceramide metabolic process (GO:0006672)	2/42	0.527644	0.902822	0	0	1.1494	0.73485	FUT7;SGMS2
cellular response to retinoic acid (GO:0071300)	2/42	0.527644	0.902822	0	0	1.1494	0.73485	WNT5B;FZD4
positive regulation of intracellular signal transduction (GO:1902533)	20/479	0.530336	0.902822	0	0	1.00138	0.635116	PDGFRB;CSF1R;KL;NCF1;FLT3;FCRL3;HGF;CARD9;TNFRSF10C;USP17L2;MERTK;CXCL10;TRIM5;CLEC6A;GPER1;EPHB2;IKBKE;S100A9;S100A8;SASH1
response to lipid (GO:0033993)	6/140	0.531375	0.902822	0	0	1.0292	0.650751	PAQR8;CXCL10;IL23R;TNFRSF10C;NR1H3;CD36
regulation of small GTPase mediated signal transduction (GO:0051056)	6/140	0.531375	0.902822	0	0	1.0292	0.650751	ARHGAP44;ARHGAP22;ITSN1;ARHGAP29;A2M;FGD2
positive regulation of synaptic transmission (GO:0050806)	3/67	0.533439	0.902822	0	0	1.0775	0.677115	RGS14;GPER1;EPHB2
negative regulation of protein binding (GO:0032091)	3/67	0.533439	0.902822	0	0	1.0775	0.677115	HFE;LRRK2;DISC1
positive regulation of peptidyl-tyrosine phosphorylation (GO:0050731)	5/116	0.534148	0.902822	0	0	1.03538	0.649271	CSF1R;FLT3;IL23R;HGF;THBS4
glucan catabolic process (GO:0009251)	1/18	0.53561	0.902822	0	0	1.35224	0.844266	STBD1
membrane lipid metabolic process (GO:0006643)	1/18	0.53561	0.902822	0	0	1.35224	0.844266	CYP1B1
regulation of cellular response to transforming growth factor beta stimulus (GO:1903844)	1/18	0.53561	0.902822	0	0	1.35224	0.844266	ITGA3
negative regulation of osteoclast differentiation (GO:0045671)	1/18	0.53561	0.902822	0	0	1.35224	0.844266	LILRB1
positive regulation of lipid catabolic process (GO:0050996)	1/18	0.53561	0.902822	0	0	1.35224	0.844266	ABCD2
negative regulation of fibroblast proliferation (GO:0048147)	1/18	0.53561	0.902822	0	0	1.35224	0.844266	PARP10
regulation of cardiac muscle cell proliferation (GO:0060043)	1/18	0.53561	0.902822	0	0	1.35224	0.844266	BMPR1A
regulation of cholesterol efflux (GO:0010874)	1/18	0.53561	0.902822	0	0	1.35224	0.844266	NR1H3
skeletal muscle contraction (GO:0003009)	1/18	0.53561	0.902822	0	0	1.35224	0.844266	STAC3
tRNA metabolic process (GO:0006399)	1/18	0.53561	0.902822	0	0	1.35224	0.844266	FARS2
heart trabecula morphogenesis (GO:0061384)	1/18	0.53561	0.902822	0	0	1.35224	0.844266	BMPR1A
dolichol-linked oligosaccharide biosynthetic process (GO:0006488)	1/18	0.53561	0.902822	0	0	1.35224	0.844266	DPAGT1
positive regulation of actin cytoskeleton reorganization (GO:2000251)	1/18	0.53561	0.902822	0	0	1.35224	0.844266	HCK
glycogen catabolic process (GO:0005980)	1/18	0.53561	0.902822	0	0	1.35224	0.844266	STBD1
regulation of cAMP-mediated signaling (GO:0043949)	1/18	0.53561	0.902822	0	0	1.35224	0.844266	CXCL10
establishment of epithelial cell polarity (GO:0090162)	1/18	0.53561	0.902822	0	0	1.35224	0.844266	FERMT1
glyceraldehyde-3-phosphate metabolic process (GO:0019682)	1/18	0.53561	0.902822	0	0	1.35224	0.844266	KHK
DNA ligation (GO:0006266)	1/18	0.53561	0.902822	0	0	1.35224	0.844266	XRCC4
negative regulation of calcium-mediated signaling (GO:0050849)	1/18	0.53561	0.902822	0	0	1.35224	0.844266	ATP2B4
regulation of B cell proliferation (GO:0030888)	2/43	0.540396	0.902822	0	0	1.12131	0.690111	FCRL3;MNDA
membrane depolarization (GO:0051899)	2/43	0.540396	0.902822	0	0	1.12131	0.690111	KCNH2;SCN5A
response to unfolded protein (GO:0006986)	2/43	0.540396	0.902822	0	0	1.12131	0.690111	HSPA7;HSPA1A
negative regulation of DNA metabolic process (GO:0051053)	2/43	0.540396	0.902822	0	0	1.12131	0.690111	ACVRL1;GPER1
response to hydrogen peroxide (GO:0042542)	2/43	0.540396	0.902822	0	0	1.12131	0.690111	TRPM2;CYP1B1
substantia nigra development (GO:0021762)	2/43	0.540396	0.902822	0	0	1.12131	0.690111	MAOB;CASP5
regulation of multicellular organismal development (GO:2000026)	2/43	0.540396	0.902822	0	0	1.12131	0.690111	CXCL10;ALOX15B
protein localization to cell periphery (GO:1990778)	5/117	0.541823	0.902822	0	0	1.02609	0.628802	MRAP;CACNB2;RAB40B;WNK3;RAB40AL
negative regulation of phosphatase activity (GO:0010923)	3/68	0.543517	0.902822	0	0	1.06087	0.646808	TSKS;SPRED1;SH2D4A
monocarboxylic acid biosynthetic process (GO:0072330)	3/68	0.543517	0.902822	0	0	1.06087	0.646808	UST;HSD17B4;LPL
regulation of endopeptidase activity (GO:0052548)	3/68	0.543517	0.902822	0	0	1.06087	0.646808	SERPINI2;SPOCK1;SERPINI1
regulation of actin filament polymerization (GO:0030833)	3/68	0.543517	0.902822	0	0	1.06087	0.646808	HCK;ALOX15;CDC42EP2
anterograde trans-synaptic signaling (GO:0098916)	10/240	0.546506	0.902822	0	0	0.999156	0.6037	CACNB2;DTNA;OPRL1;UTS2;SLC1A3;GRIK1;AMPH;MYCBPAP;TACR1;MCHR1
calcium ion transport (GO:0006816)	5/118	0.549438	0.902822	0	0	1.01695	0.609011	CACNB2;TRPM2;MCOLN3;TRPA1;ATP2B4
positive regulation of protein serine/threonine kinase activity (GO:0071902)	5/118	0.549438	0.902822	0	0	1.01695	0.609011	PDGFRB;CSF1R;FLT3;LRRK2;ATP2B4
defense response to bacterium (GO:0042742)	10/241	0.55184	0.902822	0	0	0.994778	0.591393	GSDMB;GSDMA;IL23R;DEFA3;RNASE3;DEFA1;NLRC4;LYST;S100A9;S100A8
adherens junction organization (GO:0034332)	2/44	0.552908	0.902822	0	0	1.09455	0.648592	CDH12;PVR
lymphocyte chemotaxis (GO:0048247)	2/44	0.552908	0.902822	0	0	1.09455	0.648592	CXCL10;DEFA1
amide biosynthetic process (GO:0043604)	2/44	0.552908	0.902822	0	0	1.09455	0.648592	PCSK1;SGMS2
regulation of dendrite morphogenesis (GO:0048814)	2/44	0.552908	0.902822	0	0	1.09455	0.648592	ARHGAP44;LRRK2
regulation of T cell activation (GO:0050863)	2/44	0.552908	0.902822	0	0	1.09455	0.648592	TNFAIP8L2;CCR2
negative regulation of type I interferon production (GO:0032480)	2/44	0.552908	0.902822	0	0	1.09455	0.648592	DDX58;IKBKE
heart contraction (GO:0060047)	2/44	0.552908	0.902822	0	0	1.09455	0.648592	KCNH2;SCN5A
inorganic anion transport (GO:0015698)	2/44	0.552908	0.902822	0	0	1.09455	0.648592	SLC13A4;SLC26A8
regulation of endothelial cell migration (GO:0010594)	3/69	0.553467	0.902822	0	0	1.04474	0.618021	ACVRL1;CEACAM1;SASH1
regulation of endocytosis (GO:0030100)	3/69	0.553467	0.902822	0	0	1.04474	0.618021	HCK;BMP2K;LILRB1
regulation of innate immune response (GO:0045088)	3/69	0.553467	0.902822	0	0	1.04474	0.618021	RNASEL;CD36;SAMHD1
negative regulation of angiogenesis (GO:0016525)	3/69	0.553467	0.902822	0	0	1.04474	0.618021	SPRED1;THBS4;CCR2
regulation of osteoblast differentiation (GO:0045667)	3/69	0.553467	0.902822	0	0	1.04474	0.618021	HGF;TP63;BMPR1A
response to organic cyclic compound (GO:0014070)	3/69	0.553467	0.902822	0	0	1.04474	0.618021	PAQR8;TRPM2;CYP1B1
regulation of mitotic spindle assembly (GO:1901673)	1/19	0.554993	0.902822	0	0	1.27704	0.751924	HSPA1A
negative regulation of lymphocyte activation (GO:0051250)	1/19	0.554993	0.902822	0	0	1.27704	0.751924	TNFAIP8L2
regulation of gluconeogenesis (GO:0006111)	1/19	0.554993	0.902822	0	0	1.27704	0.751924	SIK1
protein ADP-ribosylation (GO:0006471)	1/19	0.554993	0.902822	0	0	1.27704	0.751924	PARP10
regulation of sprouting angiogenesis (GO:1903670)	1/19	0.554993	0.902822	0	0	1.27704	0.751924	CEACAM1
negative regulation of cell junction assembly (GO:1901889)	1/19	0.554993	0.902822	0	0	1.27704	0.751924	ACVRL1
negative regulation of protein localization to plasma membrane (GO:1903077)	1/19	0.554993	0.902822	0	0	1.27704	0.751924	MRAP
cellular polysaccharide catabolic process (GO:0044247)	1/19	0.554993	0.902822	0	0	1.27704	0.751924	STBD1
protein targeting to lysosome (GO:0006622)	1/19	0.554993	0.902822	0	0	1.27704	0.751924	LARS
NADP metabolic process (GO:0006739)	1/19	0.554993	0.902822	0	0	1.27704	0.751924	NUDT12
positive regulation of STAT cascade (GO:1904894)	1/19	0.554993	0.902822	0	0	1.27704	0.751924	CYP1B1
negative regulation of double-strand break repair (GO:2000780)	1/19	0.554993	0.902822	0	0	1.27704	0.751924	INSL6
positive regulation of activated T cell proliferation (GO:0042104)	1/19	0.554993	0.902822	0	0	1.27704	0.751924	IL23R
negative regulation of proteolysis involved in cellular protein catabolic process (GO:1903051)	1/19	0.554993	0.902822	0	0	1.27704	0.751924	HFE
maturation of 5.8S rRNA from tricistronic rRNA transcript (SSU-rRNA, 5.8S rRNA, LSU-rRNA) (GO:0000466)	1/19	0.554993	0.902822	0	0	1.27704	0.751924	ERI2
negative regulation of transposition (GO:0010529)	1/19	0.554993	0.902822	0	0	1.27704	0.751924	TDRD9
acylglycerol biosynthetic process (GO:0046463)	1/19	0.554993	0.902822	0	0	1.27704	0.751924	LPL
muscle tissue morphogenesis (GO:0060415)	1/19	0.554993	0.902822	0	0	1.27704	0.751924	MYOM2
morphogenesis of an epithelium (GO:0002009)	1/19	0.554993	0.902822	0	0	1.27704	0.751924	AIRE
negative regulation of response to biotic stimulus (GO:0002832)	1/19	0.554993	0.902822	0	0	1.27704	0.751924	CARD8
excitatory postsynaptic potential (GO:0060079)	1/19	0.554993	0.902822	0	0	1.27704	0.751924	LRRK2
purine ribonucleoside bisphosphate metabolic process (GO:0034035)	1/19	0.554993	0.902822	0	0	1.27704	0.751924	SULT1B1
regulation of mitochondrial fission (GO:0090140)	1/19	0.554993	0.902822	0	0	1.27704	0.751924	LRRK2
osteoclast differentiation (GO:0030316)	1/19	0.554993	0.902822	0	0	1.27704	0.751924	CSF1R
nucleosome disassembly (GO:0006337)	1/19	0.554993	0.902822	0	0	1.27704	0.751924	NFE2
regulation of transcription factor import into nucleus (GO:0042990)	1/19	0.554993	0.902822	0	0	1.27704	0.751924	DDX58
chromatin disassembly (GO:0031498)	1/19	0.554993	0.902822	0	0	1.27704	0.751924	NFE2
positive regulation of interferon-alpha production (GO:0032727)	1/19	0.554993	0.902822	0	0	1.27704	0.751924	DDX58
striated muscle cell differentiation (GO:0051146)	1/19	0.554993	0.902822	0	0	1.27704	0.751924	SIK1
fatty-acyl-CoA metabolic process (GO:0035337)	1/19	0.554993	0.902822	0	0	1.27704	0.751924	HSD17B4
regulation of neuron migration (GO:2001222)	1/19	0.554993	0.902822	0	0	1.27704	0.751924	SEMA3A
negative regulation of protein localization to cell periphery (GO:1904376)	1/19	0.554993	0.902822	0	0	1.27704	0.751924	MRAP
positive regulation of immunoglobulin production (GO:0002639)	1/19	0.554993	0.902822	0	0	1.27704	0.751924	INSL6
regulation of platelet activation (GO:0010543)	1/19	0.554993	0.902822	0	0	1.27704	0.751924	F2
positive regulation of phospholipase activity (GO:0010518)	1/19	0.554993	0.902822	0	0	1.27704	0.751924	PDGFRB
DNA double-strand break processing (GO:0000729)	1/19	0.554993	0.902822	0	0	1.27704	0.751924	BRCA1
aspartate family amino acid catabolic process (GO:0009068)	1/19	0.554993	0.902822	0	0	1.27704	0.751924	OGDH
negative regulation of calcium ion transport (GO:0051926)	1/19	0.554993	0.902822	0	0	1.27704	0.751924	LILRB1
triglyceride biosynthetic process (GO:0019432)	1/19	0.554993	0.902822	0	0	1.27704	0.751924	LPL
response to interferon-beta (GO:0035456)	1/19	0.554993	0.902822	0	0	1.27704	0.751924	IKBKE
cytokine-mediated signaling pathway (GO:0019221)	26/633	0.560708	0.906814	0	0	0.983848	0.569209	CSF1R;RNASEL;FLT3;IL23R;HFE;PTAFR;ALOX15;LRRC3;IL5RA;SAMHD1;TRIM5;CHAD;CD36;FCGR1B;MAP2K6;CCR2;IL32;HGF;TNFRSF10C;HLA-G;CXCL10;HCK;CEACAM1;AIM2;OAS1;TRIM34
positive regulation of proteasomal ubiquitin-dependent protein catabolic process (GO:0032436)	3/70	0.563287	0.906814	0	0	1.0291	0.590666	DET1;LRRK2;HSPA1A
calcium-mediated signaling (GO:0019722)	3/70	0.563287	0.906814	0	0	1.0291	0.590666	PTGFR;TRPM2;LRRK2
regulation of cytoskeleton organization (GO:0051493)	4/95	0.563458	0.906814	0	0	1.01019	0.579511	ARHGAP44;PDGFRB;S100A9;S100A8
regulation of programmed cell death (GO:0043067)	11/268	0.564763	0.906814	0	0	0.983396	0.561862	FLT3;CHEK2;LRRK2;TNFRSF10C;CIDEB;CHM;BRCA1;NLRC4;USP17L2;TP63;MAP2K6
hexose metabolic process (GO:0019318)	2/45	0.565176	0.906814	0	0	1.06904	0.610013	OAS1;GALK1
regulation of synaptic transmission, glutamatergic (GO:0051966)	2/45	0.565176	0.906814	0	0	1.06904	0.610013	LRRK2;GRIK1
protein complex subunit organization (GO:0071822)	2/45	0.565176	0.906814	0	0	1.06904	0.610013	COL5A3;CYP1B1
metal ion homeostasis (GO:0055065)	2/45	0.565176	0.906814	0	0	1.06904	0.610013	KCNH2;SLC7A8
cellular metal ion homeostasis (GO:0006875)	4/96	0.571793	0.906814	0	0	0.999162	0.55851	GCM2;ATP2B4;KCNJ2;CCR2
negative regulation of cell migration (GO:0030336)	5/121	0.571908	0.906814	0	0	0.990495	0.553465	ACVRL1;NKX2-1;CYP1B1;ALOX15B;BMPR1A
regulation of cell communication (GO:0010646)	3/71	0.572975	0.906814	0	0	1.01391	0.56466	GRIK1;NLRC4;SASH1
actomyosin structure organization (GO:0031032)	3/71	0.572975	0.906814	0	0	1.01391	0.56466	TMOD1;TMOD2;MYOM2
positive regulation of growth (GO:0045927)	3/71	0.572975	0.906814	0	0	1.01391	0.56466	PRSS2;S100A9;S100A8
negative regulation of innate immune response (GO:0045824)	1/20	0.573567	0.906814	0	0	1.20977	0.672487	A2M
positive regulation of interleukin-2 production (GO:0032743)	1/20	0.573567	0.906814	0	0	1.20977	0.672487	CCR2
mesoderm formation (GO:0001707)	1/20	0.573567	0.906814	0	0	1.20977	0.672487	ITGA3
hydrogen peroxide metabolic process (GO:0042743)	1/20	0.573567	0.906814	0	0	1.20977	0.672487	MAOB
regulation of regulatory T cell differentiation (GO:0045589)	1/20	0.573567	0.906814	0	0	1.20977	0.672487	HLA-G
synapsis (GO:0007129)	1/20	0.573567	0.906814	0	0	1.20977	0.672487	HORMAD1
negative regulation of ion transport (GO:0043271)	1/20	0.573567	0.906814	0	0	1.20977	0.672487	LILRB1
response to progesterone (GO:0032570)	1/20	0.573567	0.906814	0	0	1.20977	0.672487	NR1H3
negative regulation of cyclase activity (GO:0031280)	1/20	0.573567	0.906814	0	0	1.20977	0.672487	CCR2
regulation of cholesterol transport (GO:0032374)	1/20	0.573567	0.906814	0	0	1.20977	0.672487	NR1H3
calcium-independent cell-cell adhesion via plasma membrane cell-adhesion molecules (GO:0016338)	1/20	0.573567	0.906814	0	0	1.20977	0.672487	CLDN20
axon extension (GO:0048675)	1/20	0.573567	0.906814	0	0	1.20977	0.672487	SEMA3A
intrinsic apoptotic signaling pathway in response to DNA damage by p53 class mediator (GO:0042771)	1/20	0.573567	0.906814	0	0	1.20977	0.672487	TP63
dopamine metabolic process (GO:0042417)	1/20	0.573567	0.906814	0	0	1.20977	0.672487	MAOB
autophagy of nucleus (GO:0044804)	1/20	0.573567	0.906814	0	0	1.20977	0.672487	ATG4C
regulation of anoikis (GO:2000209)	1/20	0.573567	0.906814	0	0	1.20977	0.672487	SIK1
regulation of cell development (GO:0060284)	1/20	0.573567	0.906814	0	0	1.20977	0.672487	HDAC9
regulation of response to cytokine stimulus (GO:0060759)	1/20	0.573567	0.906814	0	0	1.20977	0.672487	DDX58
steroid hormone mediated signaling pathway (GO:0043401)	1/20	0.573567	0.906814	0	0	1.20977	0.672487	GPER1
inactivation of MAPK activity (GO:0000188)	1/20	0.573567	0.906814	0	0	1.20977	0.672487	SPRED1
vesicle cytoskeletal trafficking (GO:0099518)	1/20	0.573567	0.906814	0	0	1.20977	0.672487	MYRIP
negative regulation of adenylate cyclase activity (GO:0007194)	1/20	0.573567	0.906814	0	0	1.20977	0.672487	CCR2
negative regulation of interferon-gamma production (GO:0032689)	1/20	0.573567	0.906814	0	0	1.20977	0.672487	LILRB1
cellular response to estradiol stimulus (GO:0071392)	1/20	0.573567	0.906814	0	0	1.20977	0.672487	GPER1
cellular response to steroid hormone stimulus (GO:0071383)	1/20	0.573567	0.906814	0	0	1.20977	0.672487	GPER1
entrainment of circadian clock by photoperiod (GO:0043153)	1/20	0.573567	0.906814	0	0	1.20977	0.672487	SIK1
regulation of transport (GO:0051049)	1/20	0.573567	0.906814	0	0	1.20977	0.672487	FFAR4
positive regulation of cell migration (GO:0030335)	9/221	0.576596	0.906814	0	0	0.975334	0.537032	PDGFRB;CSF1R;WNT5B;SEMA3C;SEMA3D;HGF;GPER1;SEMA3A;CCR2
intraciliary transport (GO:0042073)	2/46	0.577201	0.906814	0	0	1.04469	0.574125	IFT27;IFT80
tRNA aminoacylation for protein translation (GO:0006418)	2/46	0.577201	0.906814	0	0	1.04469	0.574125	LARS;FARS2
pyruvate metabolic process (GO:0006090)	2/46	0.577201	0.906814	0	0	1.04469	0.574125	HK3;HKDC1
mitotic spindle assembly (GO:0090307)	2/46	0.577201	0.906814	0	0	1.04469	0.574125	CHEK2;NLRC4
aminoglycan biosynthetic process (GO:0006023)	2/46	0.577201	0.906814	0	0	1.04469	0.574125	UGDH;GPC1
regulation of DNA metabolic process (GO:0051052)	2/46	0.577201	0.906814	0	0	1.04469	0.574125	ACVRL1;GPER1
cellular response to organonitrogen compound (GO:0071417)	4/97	0.580038	0.906814	0	0	0.988366	0.538325	TRPM2;LARS;BRCA1;TSHR
negative regulation of cell motility (GO:2000146)	4/97	0.580038	0.906814	0	0	0.988366	0.538325	ACVRL1;NKX2-1;CYP1B1;ALOX15B
regulation of phosphatase activity (GO:0010921)	3/72	0.582527	0.906814	0	0	0.999163	0.539927	TSKS;SPRED1;SH2D4A
negative regulation of cell cycle (GO:0045786)	3/72	0.582527	0.906814	0	0	0.999163	0.539927	GPER1;LILRB1;ALOX15B
regulated exocytosis (GO:0045055)	6/148	0.586038	0.906814	0	0	0.97081	0.518772	CLEC3B;HGF;TMEM79;PLG;CD36;A2M
phosphatidylinositol biosynthetic process (GO:0006661)	4/98	0.588192	0.906814	0	0	0.977801	0.518921	FIG4;INPP4B;PIGZ;BMX
regulation of insulin secretion (GO:0050796)	4/98	0.588192	0.906814	0	0	0.977801	0.518921	DPP4;UQCC2;GPER1;MYRIP
response to glucose (GO:0009749)	2/47	0.58898	0.906814	0	0	1.02142	0.540702	GPER1;LPL
negative regulation of I-kappaB kinase/NF-kappaB signaling (GO:0043124)	2/47	0.58898	0.906814	0	0	1.02142	0.540702	NLRP12;CARD8
regulation of intrinsic apoptotic signaling pathway (GO:2001242)	2/47	0.58898	0.906814	0	0	1.02142	0.540702	S100A9;S100A8
positive regulation of tumor necrosis factor production (GO:0032760)	2/47	0.58898	0.906814	0	0	1.02142	0.540702	DDX58;CCR2
negative regulation of JAK-STAT cascade (GO:0046426)	2/47	0.58898	0.906814	0	0	1.02142	0.540702	CHAD;LRRC3
cobalamin metabolic process (GO:0009235)	1/21	0.591367	0.906814	0	0	1.14922	0.603706	PRSS1
positive regulation of cellular component movement (GO:0051272)	1/21	0.591367	0.906814	0	0	1.14922	0.603706	CSF1R
positive regulation of leukocyte cell-cell adhesion (GO:1903039)	1/21	0.591367	0.906814	0	0	1.14922	0.603706	CCR2
regulation of ruffle assembly (GO:1900027)	1/21	0.591367	0.906814	0	0	1.14922	0.603706	USP17L2
cortical actin cytoskeleton organization (GO:0030866)	1/21	0.591367	0.906814	0	0	1.14922	0.603706	FMNL2
cellular response to hexose stimulus (GO:0071331)	1/21	0.591367	0.906814	0	0	1.14922	0.603706	GPER1
sterol transport (GO:0015918)	1/21	0.591367	0.906814	0	0	1.14922	0.603706	CD36
histone lysine demethylation (GO:0070076)	1/21	0.591367	0.906814	0	0	1.14922	0.603706	KDM4E
histone ubiquitination (GO:0016574)	1/21	0.591367	0.906814	0	0	1.14922	0.603706	RAG1
tetrapyrrole metabolic process (GO:0033013)	1/21	0.591367	0.906814	0	0	1.14922	0.603706	PRSS1
negative regulation of macroautophagy (GO:0016242)	1/21	0.591367	0.906814	0	0	1.14922	0.603706	LRRK2
positive regulation of T cell mediated immunity (GO:0002711)	1/21	0.591367	0.906814	0	0	1.14922	0.603706	IL23R
zinc II ion transport (GO:0006829)	1/21	0.591367	0.906814	0	0	1.14922	0.603706	TRPM2
positive regulation of histone acetylation (GO:0035066)	1/21	0.591367	0.906814	0	0	1.14922	0.603706	BRCA1
protein O-linked glycosylation via threonine (GO:0018243)	1/21	0.591367	0.906814	0	0	1.14922	0.603706	GALNTL6
negative regulation of G-protein coupled receptor protein signaling pathway (GO:0045744)	1/21	0.591367	0.906814	0	0	1.14922	0.603706	RPGRIP1L
regulation of macrophage activation (GO:0043030)	1/21	0.591367	0.906814	0	0	1.14922	0.603706	NR1H3
branched-chain amino acid catabolic process (GO:0009083)	1/21	0.591367	0.906814	0	0	1.14922	0.603706	BCKDHB
vesicle docking (GO:0048278)	1/21	0.591367	0.906814	0	0	1.14922	0.603706	STX19
positive regulation of BMP signaling pathway (GO:0030513)	1/21	0.591367	0.906814	0	0	1.14922	0.603706	ACVRL1
regulation of interleukin-2 production (GO:0032663)	1/21	0.591367	0.906814	0	0	1.14922	0.603706	CCR2
protein-DNA complex disassembly (GO:0032986)	1/21	0.591367	0.906814	0	0	1.14922	0.603706	NFE2
negative regulation of cAMP biosynthetic process (GO:0030818)	1/21	0.591367	0.906814	0	0	1.14922	0.603706	CCR2
long-term synaptic potentiation (GO:0060291)	1/21	0.591367	0.906814	0	0	1.14922	0.603706	RGS14
positive regulation of lipid metabolic process (GO:0045834)	1/21	0.591367	0.906814	0	0	1.14922	0.603706	F2
lipid catabolic process (GO:0016042)	1/21	0.591367	0.906814	0	0	1.14922	0.603706	CYP3A4
photoperiodism (GO:0009648)	1/21	0.591367	0.906814	0	0	1.14922	0.603706	SIK1
synaptic transmission, glutamatergic (GO:0035249)	1/21	0.591367	0.906814	0	0	1.14922	0.603706	GRIK1
negative regulation of cell cycle arrest (GO:0071157)	1/21	0.591367	0.906814	0	0	1.14922	0.603706	GPER1
B cell activation (GO:0042113)	3/73	0.591943	0.906814	0	0	0.984838	0.516395	FLT3;HDAC9;RAG1
lymphocyte differentiation (GO:0030098)	3/73	0.591943	0.906814	0	0	0.984838	0.516395	FLT3;HDAC9;RAG1
regulation of peptide hormone secretion (GO:0090276)	3/73	0.591943	0.906814	0	0	0.984838	0.516395	DPP4;UQCC2;HFE
nucleic acid phosphodiester bond hydrolysis (GO:0090305)	3/73	0.591943	0.906814	0	0	0.984838	0.516395	ERI2;DNASE1;RNASE2
positive regulation of proteasomal protein catabolic process (GO:1901800)	3/73	0.591943	0.906814	0	0	0.984838	0.516395	DET1;LRRK2;HSPA1A
regulation of intracellular signal transduction (GO:1902531)	17/422	0.593309	0.908344	0	0	0.963891	0.503189	CARD8;LRRK2;ITSN1;ARHGAP29;BRCA1;AKAP3;FGD2;ARHGAP44;ARHGAP22;TBCK;CEACAM1;NLRP12;SPRED1;CHEK2;A2M;TP63;CMKLR1
platelet degranulation (GO:0002576)	5/124	0.593782	0.908504	0	0	0.965373	0.503194	CLEC3B;HGF;PLG;CD36;A2M
cellular response to oxygen-containing compound (GO:1901701)	11/274	0.594436	0.908943	0	0	0.960656	0.499677	CXCL10;NCF1;WNT5B;LARS;FZD4;GPER1;NR1H3;DEFA3;LILRB1;DEFA1;TSHR
endosome to lysosome transport (GO:0008333)	2/48	0.600514	0.913376	0	0	0.999164	0.509544	HOOK2;LYST
regulation of cell cycle arrest (GO:0071156)	2/48	0.600514	0.913376	0	0	0.999164	0.509544	GPER1;BRCA1
glucose homeostasis (GO:0042593)	3/74	0.60122	0.913376	0	0	0.970916	0.493996	HK3;OAS1;HKDC1
mitotic nuclear division (GO:0140014)	3/74	0.60122	0.913376	0	0	0.970916	0.493996	CEP57L1;CHEK2;NLRC4
positive regulation of macromolecule metabolic process (GO:0010604)	11/276	0.604122	0.913376	0	0	0.953305	0.480446	RHOXF2;DDX58;HFE;GPER1;NKX2-1;RLN2;LILRB1;BRCA1;CD36;EPHB2;HSPA1A
regulation of interferon-gamma-mediated signaling pathway (GO:0060334)	1/22	0.608425	0.913376	0	0	1.09444	0.543806	NR1H3
protein localization to cilium (GO:0061512)	1/22	0.608425	0.913376	0	0	1.09444	0.543806	ARL6
regulation of catecholamine secretion (GO:0050433)	1/22	0.608425	0.913376	0	0	1.09444	0.543806	KCNA2
lymphocyte activation involved in immune response (GO:0002285)	1/22	0.608425	0.913376	0	0	1.09444	0.543806	CD1C
early endosome to late endosome transport (GO:0045022)	1/22	0.608425	0.913376	0	0	1.09444	0.543806	HOOK2
hematopoietic progenitor cell differentiation (GO:0002244)	1/22	0.608425	0.913376	0	0	1.09444	0.543806	FLT3
nuclear transport (GO:0051169)	1/22	0.608425	0.913376	0	0	1.09444	0.543806	RGS14
regulation of transcription from RNA polymerase III promoter (GO:0006359)	1/22	0.608425	0.913376	0	0	1.09444	0.543806	BRCA1
DNA catabolic process, endonucleolytic (GO:0000737)	1/22	0.608425	0.913376	0	0	1.09444	0.543806	DNASE1
cytosolic calcium ion transport (GO:0060401)	1/22	0.608425	0.913376	0	0	1.09444	0.543806	JPH4
positive regulation of erythrocyte differentiation (GO:0045648)	1/22	0.608425	0.913376	0	0	1.09444	0.543806	HSPA1A
triglyceride catabolic process (GO:0019433)	1/22	0.608425	0.913376	0	0	1.09444	0.543806	LPL
regulation of cytokine production involved in inflammatory response (GO:1900015)	1/22	0.608425	0.913376	0	0	1.09444	0.543806	F2
STAT cascade (GO:0097696)	1/22	0.608425	0.913376	0	0	1.09444	0.543806	CCR2
branched-chain amino acid metabolic process (GO:0009081)	1/22	0.608425	0.913376	0	0	1.09444	0.543806	BCKDHB
protein O-linked glycosylation via serine (GO:0018242)	1/22	0.608425	0.913376	0	0	1.09444	0.543806	GALNTL6
positive regulation of biosynthetic process (GO:0009891)	1/22	0.608425	0.913376	0	0	1.09444	0.543806	CD36
negative regulation of protein import into nucleus (GO:0042308)	1/22	0.608425	0.913376	0	0	1.09444	0.543806	PARP10
regulation of ERBB signaling pathway (GO:1901184)	1/22	0.608425	0.913376	0	0	1.09444	0.543806	CEACAM1
protein complex localization (GO:0031503)	1/22	0.608425	0.913376	0	0	1.09444	0.543806	IFT27
positive regulation of RNA splicing (GO:0033120)	1/22	0.608425	0.913376	0	0	1.09444	0.543806	HSPA1A
ncRNA catabolic process (GO:0034661)	1/22	0.608425	0.913376	0	0	1.09444	0.543806	EXOSC5
regulation of bone resorption (GO:0045124)	1/22	0.608425	0.913376	0	0	1.09444	0.543806	CSF1R
negative regulation of lyase activity (GO:0051350)	1/22	0.608425	0.913376	0	0	1.09444	0.543806	CCR2
positive regulation of phosphatase activity (GO:0010922)	1/22	0.608425	0.913376	0	0	1.09444	0.543806	PDGFRB
negative regulation of phosphorylation (GO:0042326)	3/75	0.610358	0.915166	0	0	0.957381	0.472669	LRRK2;PRR5L;EPHB2
gland development (GO:0048732)	3/75	0.610358	0.915166	0	0	0.957381	0.472669	GCM2;NKX2-1;ALOX15B
protein autoubiquitination (GO:0051865)	2/49	0.611801	0.915536	0	0	0.977854	0.480466	BRCA1;RAG1
positive regulation of response to DNA damage stimulus (GO:2001022)	2/49	0.611801	0.915536	0	0	0.977854	0.480466	SPRED1;BRCA1
gonad development (GO:0008406)	2/49	0.611801	0.915536	0	0	0.977854	0.480466	MKKS;KLHL32
regulation of protein ubiquitination (GO:0031396)	4/101	0.612086	0.915536	0	0	0.94741	0.465066	LRRK2;BRCA1;SASH1;HSPA1A
positive regulation of mitochondrion organization (GO:0010822)	5/128	0.621954	0.917297	0	0	0.933782	0.443443	HHAT;GPER1;TDRD12;CIDEB;RNASE2
regulation of protein processing (GO:0070613)	5/128	0.621954	0.917297	0	0	0.933782	0.443443	C1QB;LRRK2;F2;USP17L2;C1QC
wound healing (GO:0042060)	2/50	0.622844	0.917297	0	0	0.957432	0.453306	MYOF;ALOX15
negative regulation of protein ubiquitination (GO:0031397)	2/50	0.622844	0.917297	0	0	0.957432	0.453306	HFE;HSPA1A
neurogenesis (GO:0022008)	2/50	0.622844	0.917297	0	0	0.957432	0.453306	GCM2;SPOCK1
regulation of protein oligomerization (GO:0032459)	1/23	0.624771	0.917297	0	0	1.04464	0.491365	AIM2
chromosome condensation (GO:0030261)	1/23	0.624771	0.917297	0	0	1.04464	0.491365	GPER1
ammonium transport (GO:0015696)	1/23	0.624771	0.917297	0	0	1.04464	0.491365	SLC22A3
positive regulation of ERBB signaling pathway (GO:1901186)	1/23	0.624771	0.917297	0	0	1.04464	0.491365	GPER1
melanosome organization (GO:0032438)	1/23	0.624771	0.917297	0	0	1.04464	0.491365	LYST
cell-cell adhesion mediated by cadherin (GO:0044331)	1/23	0.624771	0.917297	0	0	1.04464	0.491365	CDH12
positive regulation of protein oligomerization (GO:0032461)	1/23	0.624771	0.917297	0	0	1.04464	0.491365	AIM2
cellular amino acid catabolic process (GO:0009063)	1/23	0.624771	0.917297	0	0	1.04464	0.491365	BCKDHB
TOR signaling (GO:0031929)	1/23	0.624771	0.917297	0	0	1.04464	0.491365	PRR5L
zinc II ion transmembrane transport (GO:0071577)	1/23	0.624771	0.917297	0	0	1.04464	0.491365	TRPM2
positive regulation of mRNA catabolic process (GO:0061014)	1/23	0.624771	0.917297	0	0	1.04464	0.491365	PRR5L
protein K48-linked deubiquitination (GO:0071108)	1/23	0.624771	0.917297	0	0	1.04464	0.491365	USP17L2
vesicle-mediated transport between endosomal compartments (GO:0098927)	1/23	0.624771	0.917297	0	0	1.04464	0.491365	HOOK2
peroxisome organization (GO:0007031)	1/23	0.624771	0.917297	0	0	1.04464	0.491365	PEX11A
cellular response to ammonium ion (GO:0071242)	1/23	0.624771	0.917297	0	0	1.04464	0.491365	LRRK2
negative regulation of signal transduction in absence of ligand (GO:1901099)	1/23	0.624771	0.917297	0	0	1.04464	0.491365	HSPA1A
apoptotic nuclear changes (GO:0030262)	1/23	0.624771	0.917297	0	0	1.04464	0.491365	GPER1
regulation of interleukin-8 secretion (GO:2000482)	1/23	0.624771	0.917297	0	0	1.04464	0.491365	ANXA4
negative regulation of extrinsic apoptotic signaling pathway in absence of ligand (GO:2001240)	1/23	0.624771	0.917297	0	0	1.04464	0.491365	HSPA1A
protein localization to Golgi apparatus (GO:0034067)	1/23	0.624771	0.917297	0	0	1.04464	0.491365	ARFRP1
autophagosome maturation (GO:0097352)	1/23	0.624771	0.917297	0	0	1.04464	0.491365	LIX1
regulation of monooxygenase activity (GO:0032768)	1/23	0.624771	0.917297	0	0	1.04464	0.491365	SPR
positive regulation of ion transmembrane transporter activity (GO:0032414)	1/23	0.624771	0.917297	0	0	1.04464	0.491365	WNK3
cellular response to amyloid-beta (GO:1904646)	1/23	0.624771	0.917297	0	0	1.04464	0.491365	CD36
regulation of chondrocyte differentiation (GO:0032330)	1/23	0.624771	0.917297	0	0	1.04464	0.491365	ACVRL1
regulation of ion homeostasis (GO:2000021)	1/23	0.624771	0.917297	0	0	1.04464	0.491365	WNK3
positive regulation of angiogenesis (GO:0045766)	4/103	0.627532	0.920802	0	0	0.928173	0.432493	RLN2;CYP1B1;BRCA1;SASH1
positive regulation of cytoskeleton organization (GO:0051495)	3/77	0.628208	0.921247	0	0	0.931408	0.432997	HCK;ALOX15;CDC42EP2
negative regulation of neuron projection development (GO:0010977)	2/51	0.633641	0.922856	0	0	0.937843	0.427912	SEMA3A;SPOCK1
regulation of exocytosis (GO:0017157)	2/51	0.633641	0.922856	0	0	0.937843	0.427912	RAB40B;RAB40AL
regulation of nucleic acid-templated transcription (GO:1903506)	24/607	0.635963	0.922856	0	0	0.944438	0.427466	ZNF221;ZNF573;ACVRL1;ZNF175;ZNF284;ZNF283;AIRE;ZNF391;ZFP2;ZNF2;ZNF429;ZNF605;CHEK2;ZNF74;ZNF239;ZNF546;ZNF501;ZNF585B;ZNF157;ZNF234;ZNF311;ZNF630;ZNF233;ZNF860
fibroblast growth factor receptor signaling pathway (GO:0008543)	3/78	0.636918	0.922856	0	0	0.918941	0.414547	KL;SPRED1;ESRP1
positive regulation of microtubule polymerization (GO:0031116)	1/24	0.640436	0.922856	0	0	0.999165	0.445233	HSPA1A
dendritic spine organization (GO:0097061)	1/24	0.640436	0.922856	0	0	0.999165	0.445233	EPHB2
histone monoubiquitination (GO:0010390)	1/24	0.640436	0.922856	0	0	0.999165	0.445233	RAG1
ear morphogenesis (GO:0042471)	1/24	0.640436	0.922856	0	0	0.999165	0.445233	EPHB2
negative regulation of sequestering of calcium ion (GO:0051283)	1/24	0.640436	0.922856	0	0	0.999165	0.445233	TRPM2
camera-type eye development (GO:0043010)	1/24	0.640436	0.922856	0	0	0.999165	0.445233	CYP1B1
regulation of epidermal growth factor-activated receptor activity (GO:0007176)	1/24	0.640436	0.922856	0	0	0.999165	0.445233	NCF1
positive regulation of endopeptidase activity (GO:0010950)	1/24	0.640436	0.922856	0	0	0.999165	0.445233	AIM2
axoneme assembly (GO:0035082)	1/24	0.640436	0.922856	0	0	0.999165	0.445233	SPAG17
regulation of chemotaxis (GO:0050920)	1/24	0.640436	0.922856	0	0	0.999165	0.445233	PDGFRB
negative regulation of oxidative stress-induced cell death (GO:1903202)	1/24	0.640436	0.922856	0	0	0.999165	0.445233	LRRK2
cilium-dependent cell motility (GO:0060285)	1/24	0.640436	0.922856	0	0	0.999165	0.445233	DNAH7
regulation of neuronal synaptic plasticity (GO:0048168)	1/24	0.640436	0.922856	0	0	0.999165	0.445233	EPHB2
negative regulation of interleukin-6 production (GO:0032715)	1/24	0.640436	0.922856	0	0	0.999165	0.445233	NLRP12
transition metal ion homeostasis (GO:0055076)	1/24	0.640436	0.922856	0	0	0.999165	0.445233	HFE
proteoglycan biosynthetic process (GO:0030166)	1/24	0.640436	0.922856	0	0	0.999165	0.445233	GLCE
negative regulation of proteasomal ubiquitin-dependent protein catabolic process (GO:0032435)	1/24	0.640436	0.922856	0	0	0.999165	0.445233	HFE
cytoplasmic pattern recognition receptor signaling pathway (GO:0002753)	1/24	0.640436	0.922856	0	0	0.999165	0.445233	MAP2K6
regulation of cell cycle G1/S phase transition (GO:1902806)	1/24	0.640436	0.922856	0	0	0.999165	0.445233	ATP2B4
regulation of cellular senescence (GO:2000772)	1/24	0.640436	0.922856	0	0	0.999165	0.445233	ZKSCAN3
organic cation transport (GO:0015695)	1/24	0.640436	0.922856	0	0	0.999165	0.445233	SLC22A3
chemokine-mediated signaling pathway (GO:0070098)	2/52	0.644196	0.922856	0	0	0.919038	0.40415	CXCL10;CCR2
plasma membrane bounded cell projection morphogenesis (GO:0120039)	2/52	0.644196	0.922856	0	0	0.919038	0.40415	GPM6A;LRRK2
positive regulation of cell-substrate adhesion (GO:0010811)	2/52	0.644196	0.922856	0	0	0.919038	0.40415	ALOX15;CD36
positive regulation of secretion by cell (GO:1903532)	2/52	0.644196	0.922856	0	0	0.919038	0.40415	GPER1;GOLPH3L
steroid biosynthetic process (GO:0006694)	3/79	0.645486	0.922856	0	0	0.906802	0.396955	GUCY2C;HSD17B4;CYP17A1
cell-cell junction assembly (GO:0007043)	3/79	0.645486	0.922856	0	0	0.906802	0.396955	LIM2;POF1B;CDH12
regulation of transforming growth factor beta receptor signaling pathway (GO:0017015)	3/79	0.645486	0.922856	0	0	0.906802	0.396955	ITGA3;NKX2-1;HSPA1A
phosphorylation (GO:0016310)	15/386	0.647361	0.922856	0	0	0.927846	0.403475	DGKG;ACVRL1;RNASEL;LRRK2;BMX;MERTK;HCK;CHEK2;WNK3;BMP2K;SIK1;EPHB2;IKBKE;XYLB;BMPR1A
positive regulation of cellular catabolic process (GO:0031331)	4/106	0.649951	0.922856	0	0	0.900732	0.388088	ABCD2;UQCC2;LRRK2;PRR5L
spindle assembly (GO:0051225)	3/80	0.653909	0.922856	0	0	0.894979	0.380176	GOLGA6A;CHEK2;NLRC4
negative regulation of cellular response to transforming growth factor beta stimulus (GO:1903845)	2/53	0.654508	0.922856	0	0	0.900971	0.381896	NKX2-1;HSPA1A
glycolytic process through glucose-6-phosphate (GO:0061620)	1/25	0.655448	0.922856	0	0	0.957483	0.404475	HK3
signal peptide processing (GO:0006465)	1/25	0.655448	0.922856	0	0	0.957483	0.404475	F2
canonical glycolysis (GO:0061621)	1/25	0.655448	0.922856	0	0	0.957483	0.404475	HK3
glucose catabolic process to pyruvate (GO:0061718)	1/25	0.655448	0.922856	0	0	0.957483	0.404475	HK3
regulation of spindle assembly (GO:0090169)	1/25	0.655448	0.922856	0	0	0.957483	0.404475	HSPA1A
glial cell differentiation (GO:0010001)	1/25	0.655448	0.922856	0	0	0.957483	0.404475	GPC1
nucleotide-binding domain, leucine rich repeat containing receptor signaling pathway (GO:0035872)	1/25	0.655448	0.922856	0	0	0.957483	0.404475	MAP2K6
regulation of protein ubiquitination involved in ubiquitin-dependent protein catabolic process (GO:2000058)	1/25	0.655448	0.922856	0	0	0.957483	0.404475	HFE
neutral amino acid transport (GO:0015804)	1/25	0.655448	0.922856	0	0	0.957483	0.404475	SLC7A8
regulation of ryanodine-sensitive calcium-release channel activity (GO:0060314)	1/25	0.655448	0.922856	0	0	0.957483	0.404475	JPH4
prostaglandin metabolic process (GO:0006693)	1/25	0.655448	0.922856	0	0	0.957483	0.404475	PTGR2
response to amyloid-beta (GO:1904645)	1/25	0.655448	0.922856	0	0	0.957483	0.404475	CD36
positive regulation of nuclear division (GO:0051785)	1/25	0.655448	0.922856	0	0	0.957483	0.404475	PDGFRB
regulation of interleukin-10 production (GO:0032653)	1/25	0.655448	0.922856	0	0	0.957483	0.404475	IL23R
regulation of DNA damage response, signal transduction by p53 class mediator (GO:0043516)	1/25	0.655448	0.922856	0	0	0.957483	0.404475	SPRED1
positive regulation of filopodium assembly (GO:0051491)	1/25	0.655448	0.922856	0	0	0.957483	0.404475	GPM6A
monocarboxylic acid catabolic process (GO:0072329)	1/25	0.655448	0.922856	0	0	0.957483	0.404475	NUDT7
positive regulation of glucose transport (GO:0010828)	1/25	0.655448	0.922856	0	0	0.957483	0.404475	CLTCL1
modulation of excitatory postsynaptic potential (GO:0098815)	1/25	0.655448	0.922856	0	0	0.957483	0.404475	LRRK2
female gamete generation (GO:0007292)	1/25	0.655448	0.922856	0	0	0.957483	0.404475	HORMAD1
regulation of apoptotic signaling pathway (GO:2001233)	1/25	0.655448	0.922856	0	0	0.957483	0.404475	DEPTOR
regulation of viral release from host cell (GO:1902186)	1/25	0.655448	0.922856	0	0	0.957483	0.404475	TRIM5
positive regulation of Rho protein signal transduction (GO:0035025)	1/25	0.655448	0.922856	0	0	0.957483	0.404475	F2RL2
negative regulation of epithelial to mesenchymal transition (GO:0010719)	1/25	0.655448	0.922856	0	0	0.957483	0.404475	NKX2-1
protein depolymerization (GO:0051261)	1/25	0.655448	0.922856	0	0	0.957483	0.404475	MICAL2
3'-phosphoadenosine 5'-phosphosulfate metabolic process (GO:0050427)	1/25	0.655448	0.922856	0	0	0.957483	0.404475	SULT1B1
negative regulation of locomotion (GO:0040013)	1/25	0.655448	0.922856	0	0	0.957483	0.404475	TRIM5
regulation of nervous system development (GO:0051960)	1/25	0.655448	0.922856	0	0	0.957483	0.404475	LRRK2
regulation of cellular protein localization (GO:1903827)	1/25	0.655448	0.922856	0	0	0.957483	0.404475	HFE
L-amino acid transport (GO:0015807)	1/25	0.655448	0.922856	0	0	0.957483	0.404475	SLC1A3
positive regulation of nitric oxide biosynthetic process (GO:0045429)	1/25	0.655448	0.922856	0	0	0.957483	0.404475	CD36
positive regulation of peptidyl-threonine phosphorylation (GO:0010800)	1/25	0.655448	0.922856	0	0	0.957483	0.404475	WNK3
signal transduction in response to DNA damage (GO:0042770)	1/25	0.655448	0.922856	0	0	0.957483	0.404475	CHEK2
positive regulation of nitric oxide metabolic process (GO:1904407)	1/25	0.655448	0.922856	0	0	0.957483	0.404475	CD36
protein localization to membrane (GO:0072657)	6/160	0.661364	0.925343	0	0	0.894598	0.369872	MRAP;CACNB2;RAB40B;WNK3;SH3PXD2B;RAB40AL
positive regulation of protein targeting to mitochondrion (GO:1903955)	3/81	0.662187	0.925343	0	0	0.883458	0.364168	HHAT;TDRD12;RNASE2
BMP signaling pathway (GO:0030509)	3/81	0.662187	0.925343	0	0	0.883458	0.364168	ACVRL1;HFE;BMPR1A
negative regulation of cell cycle process (GO:0010948)	3/81	0.662187	0.925343	0	0	0.883458	0.364168	TOM1L2;GPER1;BRCA1
chemical synaptic transmission (GO:0007268)	11/289	0.664228	0.925343	0	0	0.908101	0.371531	CACNB2;DTNA;STAC3;OPRL1;UTS2;SLC1A3;GRIK1;AMPH;MYCBPAP;TACR1;MCHR1
cell morphogenesis involved in differentiation (GO:0000904)	2/54	0.664581	0.925343	0	0	0.883598	0.361038	POF1B;ARL13B
negative regulation of cellular component organization (GO:0051129)	2/54	0.664581	0.925343	0	0	0.883598	0.361038	LILRB1;HSPA1A
positive regulation of immune response (GO:0050778)	2/54	0.664581	0.925343	0	0	0.883598	0.361038	IL23R;LILRB1
negative regulation of intracellular signal transduction (GO:1902532)	6/161	0.667239	0.925343	0	0	0.88878	0.359607	SPRED1;NLRP12;DEPTOR;GPER1;CARD8;ATP2B4
bile acid biosynthetic process (GO:0006699)	1/26	0.669834	0.925343	0	0	0.919136	0.368321	HSD17B4
positive regulation of glucose import (GO:0046326)	1/26	0.669834	0.925343	0	0	0.919136	0.368321	CLTCL1
positive regulation of synapse assembly (GO:0051965)	1/26	0.669834	0.925343	0	0	0.919136	0.368321	EPHB2
cytoskeleton-dependent intracellular transport (GO:0030705)	1/26	0.669834	0.925343	0	0	0.919136	0.368321	HOOK2
response to gamma radiation (GO:0010332)	1/26	0.669834	0.925343	0	0	0.919136	0.368321	TP63
monovalent inorganic cation homeostasis (GO:0055067)	1/26	0.669834	0.925343	0	0	0.919136	0.368321	KCNH2
positive regulation of interferon-beta production (GO:0032728)	1/26	0.669834	0.925343	0	0	0.919136	0.368321	DDX58
positive regulation of wound healing (GO:0090303)	1/26	0.669834	0.925343	0	0	0.919136	0.368321	F2
response to ketone (GO:1901654)	1/26	0.669834	0.925343	0	0	0.919136	0.368321	NR1H3
negative regulation of catalytic activity (GO:0043086)	1/26	0.669834	0.925343	0	0	0.919136	0.368321	GZMA
regulation of cardiac muscle cell contraction (GO:0086004)	1/26	0.669834	0.925343	0	0	0.919136	0.368321	SCN5A
regulation of muscle contraction (GO:0006937)	1/26	0.669834	0.925343	0	0	0.919136	0.368321	CNN1
regulation of histone acetylation (GO:0035065)	1/26	0.669834	0.925343	0	0	0.919136	0.368321	BRCA1
regulation of viral entry into host cell (GO:0046596)	1/26	0.669834	0.925343	0	0	0.919136	0.368321	TRIM5
fat-soluble vitamin metabolic process (GO:0006775)	1/26	0.669834	0.925343	0	0	0.919136	0.368321	CYP3A4
phosphatidylethanolamine acyl-chain remodeling (GO:0036152)	1/26	0.669834	0.925343	0	0	0.919136	0.368321	PLA2G4C
strand displacement (GO:0000732)	1/26	0.669834	0.925343	0	0	0.919136	0.368321	BRCA1
GPI anchor metabolic process (GO:0006505)	1/26	0.669834	0.925343	0	0	0.919136	0.368321	PIGZ
regulation of T cell receptor signaling pathway (GO:0050856)	1/26	0.669834	0.925343	0	0	0.919136	0.368321	CEACAM1
regulation of rhodopsin mediated signaling pathway (GO:0022400)	1/26	0.669834	0.925343	0	0	0.919136	0.368321	GUCY2D
regulation of anatomical structure morphogenesis (GO:0022603)	3/82	0.670321	0.925343	0	0	0.87223	0.34889	CEACAM1;FMNL2;LRRK2
DNA damage response, signal transduction by p53 class mediator (GO:0030330)	3/82	0.670321	0.925343	0	0	0.87223	0.34889	CHEK2;BRCA1;TP63
retrograde transport, endosome to Golgi (GO:0042147)	3/82	0.670321	0.925343	0	0	0.87223	0.34889	ARFRP1;HEATR5A;CLTCL1
positive regulation of DNA metabolic process (GO:0051054)	3/82	0.670321	0.925343	0	0	0.87223	0.34889	PDGFRB;HGF;BRCA1
positive regulation of transmembrane receptor protein serine/threonine kinase signaling pathway (GO:0090100)	3/82	0.670321	0.925343	0	0	0.87223	0.34889	ACVRL1;HFE;BMPR1A
negative regulation of binding (GO:0051100)	3/82	0.670321	0.925343	0	0	0.87223	0.34889	LRRK2;GZMA;DISC1
circulatory system development (GO:0072359)	4/109	0.671455	0.925357	0	0	0.874859	0.348464	MKKS;SH3PXD2B;MICAL2;HDAC9
regulation of cell motility (GO:2000145)	4/109	0.671455	0.925357	0	0	0.874859	0.348464	CSF1R;CEACAM1;DDX58;USP17L2
Wnt signaling pathway (GO:0016055)	4/109	0.671455	0.925357	0	0	0.874859	0.348464	WNT5B;ARL6;FZD4;LRRK2
negative regulation of transforming growth factor beta receptor signaling pathway (GO:0030512)	2/55	0.674415	0.927884	0	0	0.866881	0.341473	NKX2-1;HSPA1A
positive regulation of DNA biosynthetic process (GO:2000573)	2/55	0.674415	0.927884	0	0	0.866881	0.341473	PDGFRB;HGF
DNA recombination (GO:0006310)	2/55	0.674415	0.927884	0	0	0.866881	0.341473	BRCA1;RAG1
negative regulation of endopeptidase activity (GO:0010951)	3/83	0.678311	0.92817	0	0	0.861282	0.334306	SERPINI2;SPOCK1;SERPINI1
positive regulation of establishment of protein localization to mitochondrion (GO:1903749)	4/110	0.678417	0.92817	0	0	0.866561	0.336219	HHAT;TDRD12;RNASE2;TP63
protein phosphorylation (GO:0006468)	18/470	0.678572	0.92817	0	0	0.913294	0.354143	ACVRL1;PDGFRB;CSF1R;RNASEL;FLT3;LRRK2;BMX;MERTK;HCK;CHEK2;WNK3;BMP2K;SIK1;EPHB2;IKBKE;STK32C;MAP2K6;BMPR1A
positive regulation of protein modification process (GO:0031401)	6/163	0.678794	0.92817	0	0	0.877365	0.339924	CSF1R;HGF;LRRK2;GPER1;ATG10;F2
positive regulation of transferase activity (GO:0051347)	5/137	0.680889	0.92817	0	0	0.869704	0.334276	PDGFRB;CSF1R;FLT3;EPHB2;MERTK
phosphatidylcholine acyl-chain remodeling (GO:0036151)	1/27	0.68362	0.92817	0	0	0.883738	0.336133	PLA2G4C
response to hexose (GO:0009746)	1/27	0.68362	0.92817	0	0	0.883738	0.336133	LPL
negative regulation of synaptic transmission (GO:0050805)	1/27	0.68362	0.92817	0	0	0.883738	0.336133	LRRK2
negative regulation of small GTPase mediated signal transduction (GO:0051058)	1/27	0.68362	0.92817	0	0	0.883738	0.336133	EPHB2
regulation of double-strand break repair via homologous recombination (GO:0010569)	1/27	0.68362	0.92817	0	0	0.883738	0.336133	INSL6
regulation of protein localization to nucleus (GO:1900180)	1/27	0.68362	0.92817	0	0	0.883738	0.336133	F2
regulation of extrinsic apoptotic signaling pathway in absence of ligand (GO:2001239)	1/27	0.68362	0.92817	0	0	0.883738	0.336133	HSPA1A
transcription from RNA polymerase III promoter (GO:0006383)	1/27	0.68362	0.92817	0	0	0.883738	0.336133	POLR3GL
release of sequestered calcium ion into cytosol (GO:0051209)	1/27	0.68362	0.92817	0	0	0.883738	0.336133	TRPM2
negative regulation of cell-matrix adhesion (GO:0001953)	1/27	0.68362	0.92817	0	0	0.883738	0.336133	ACVRL1
regulation of protein targeting to membrane (GO:0090313)	1/27	0.68362	0.92817	0	0	0.883738	0.336133	USP17L2
protein targeting to vacuole (GO:0006623)	1/27	0.68362	0.92817	0	0	0.883738	0.336133	LARS
muscle fiber development (GO:0048747)	1/27	0.68362	0.92817	0	0	0.883738	0.336133	MYOM2
regulation of protein localization to cell surface (GO:2000008)	1/27	0.68362	0.92817	0	0	0.883738	0.336133	HFE
cellular response to glucose stimulus (GO:0071333)	1/27	0.68362	0.92817	0	0	0.883738	0.336133	GPER1
regulation of tumor necrosis factor-mediated signaling pathway (GO:0010803)	2/56	0.684013	0.92817	0	0	0.850783	0.323109	CARD8;HSPA1A
regulation of BMP signaling pathway (GO:0030510)	2/56	0.684013	0.92817	0	0	0.850783	0.323109	ACVRL1;ITGA3
positive regulation of protein transport (GO:0051222)	2/56	0.684013	0.92817	0	0	0.850783	0.323109	GOLPH3L;PRR5L
autophagosome organization (GO:1905037)	2/56	0.684013	0.92817	0	0	0.850783	0.323109	ATG16L2;ATG4C
glycosaminoglycan catabolic process (GO:0006027)	2/56	0.684013	0.92817	0	0	0.850783	0.323109	GPC1;LYVE1
glycerophospholipid biosynthetic process (GO:0046474)	6/164	0.684473	0.928284	0	0	0.871767	0.330492	SLC44A5;FIG4;INPP4B;ALOX15;PLD1;BMX
regulation of protein binding (GO:0043393)	4/111	0.685276	0.928863	0	0	0.858417	0.324425	HFE;LRRK2;CD36;DISC1
positive regulation of supramolecular fiber organization (GO:1902905)	3/84	0.686156	0.929037	0	0	0.850604	0.32038	HCK;ALOX15;CDC42EP2
regulation of mitotic nuclear division (GO:0007088)	3/84	0.686156	0.929037	0	0	0.850604	0.32038	PDGFRB;TOM1L2;HSPA1A
response to cytokine (GO:0034097)	5/138	0.687041	0.929725	0	0	0.86312	0.323982	CSF1R;NLRP12;FLT3;IL23R;IKBKE
chloride transmembrane transport (GO:1902476)	2/57	0.693379	0.93074	0	0	0.835271	0.305858	SLC26A8;SLC1A3
response to retinoic acid (GO:0032526)	2/57	0.693379	0.93074	0	0	0.835271	0.305858	WNT5B;FZD4
regulation of peptidyl-tyrosine phosphorylation (GO:0050730)	3/85	0.693858	0.93074	0	0	0.840187	0.307079	IL23R;HGF;THBS4
regulation of type I interferon production (GO:0032479)	3/85	0.693858	0.93074	0	0	0.840187	0.307079	DDX58;POLR3GL;IKBKE
neuron projection extension (GO:1990138)	1/28	0.696831	0.93074	0	0	0.850963	0.307379	SEMA3A
regulation of TORC1 signaling (GO:1903432)	1/28	0.696831	0.93074	0	0	0.850963	0.307379	LARS
cellular response to ketone (GO:1901655)	1/28	0.696831	0.93074	0	0	0.850963	0.307379	PTGDR
RNA phosphodiester bond hydrolysis (GO:0090501)	1/28	0.696831	0.93074	0	0	0.850963	0.307379	RNASE2
negative regulation of proteasomal protein catabolic process (GO:1901799)	1/28	0.696831	0.93074	0	0	0.850963	0.307379	HFE
cellular amino acid biosynthetic process (GO:0008652)	1/28	0.696831	0.93074	0	0	0.850963	0.307379	DPAGT1
positive regulation of sprouting angiogenesis (GO:1903672)	1/28	0.696831	0.93074	0	0	0.850963	0.307379	HDAC9
chondrocyte differentiation (GO:0002062)	1/28	0.696831	0.93074	0	0	0.850963	0.307379	WNT5B
positive regulation of cytosolic calcium ion concentration involved in phospholipase C-activating G-protein coupled signaling pathway (GO:0051482)	1/28	0.696831	0.93074	0	0	0.850963	0.307379	F2RL2
positive regulation of extrinsic apoptotic signaling pathway (GO:2001238)	1/28	0.696831	0.93074	0	0	0.850963	0.307379	GPER1
organelle fission (GO:0048285)	1/28	0.696831	0.93074	0	0	0.850963	0.307379	PEX11A
regulation of transmembrane receptor protein serine/threonine kinase signaling pathway (GO:0090092)	1/28	0.696831	0.93074	0	0	0.850963	0.307379	ITGA3
regulation of NIK/NF-kappaB signaling (GO:1901222)	1/28	0.696831	0.93074	0	0	0.850963	0.307379	SASH1
negative regulation of JNK cascade (GO:0046329)	1/28	0.696831	0.93074	0	0	0.850963	0.307379	FKTN
positive regulation of lipid biosynthetic process (GO:0046889)	1/28	0.696831	0.93074	0	0	0.850963	0.307379	NR1H3
nucleotide-binding oligomerization domain containing signaling pathway (GO:0070423)	1/28	0.696831	0.93074	0	0	0.850963	0.307379	MAP2K6
calcium ion import (GO:0070509)	1/28	0.696831	0.93074	0	0	0.850963	0.307379	CACNB2
protein K63-linked deubiquitination (GO:0070536)	1/28	0.696831	0.93074	0	0	0.850963	0.307379	USP17L2
regulation of cell morphogenesis (GO:0022604)	1/28	0.696831	0.93074	0	0	0.850963	0.307379	FMNL2
bicellular tight junction assembly (GO:0070830)	1/28	0.696831	0.93074	0	0	0.850963	0.307379	POF1B
ion transmembrane transport (GO:0034220)	8/219	0.697866	0.931619	0	0	0.870064	0.312987	KCNH2;SLC13A3;SLC13A4;ATP8B1;ATP10D;ANXA6;ATP2B4;ATP6V1E2
regulation of organelle organization (GO:0033043)	4/113	0.698682	0.931702	0	0	0.842578	0.302114	TBC1D8B;TBCK;S100A9;S100A8
positive regulation of developmental process (GO:0051094)	4/113	0.698682	0.931702	0	0	0.842578	0.302114	INSL6;TMEM79;HLA-G;BMPR1A
inorganic cation transmembrane transport (GO:0098662)	5/140	0.699103	0.93176	0	0	0.850243	0.304351	TRPM2;MCOLN3;TRPA1;ATP2B4;SCN5A
regulation of epidermal growth factor receptor signaling pathway (GO:0042058)	2/58	0.702514	0.934291	0	0	0.820312	0.289644	CEACAM1;GPER1
cholesterol homeostasis (GO:0042632)	2/58	0.702514	0.934291	0	0	0.820312	0.289644	LPL;NR1H3
autophagosome assembly (GO:0000045)	2/58	0.702514	0.934291	0	0	0.820312	0.289644	ATG16L2;ATG4C
sterol homeostasis (GO:0055092)	2/58	0.702514	0.934291	0	0	0.820312	0.289644	LPL;NR1H3
regulation of cellular macromolecule biosynthetic process (GO:2000112)	24/631	0.708586	0.936012	0	0	0.905925	0.312076	ZNF221;ZNF573;ACVRL1;ZNF175;ZNF284;ZNF283;AIRE;ZNF391;ZFP2;ZNF2;ZNF429;ZNF605;CHEK2;ZNF74;ZNF239;ZNF546;ZNF501;ZNF585B;ZNF157;ZNF234;ZNF311;ZNF630;ZNF233;ZNF860
cellular response to BMP stimulus (GO:0071773)	3/87	0.70883	0.936012	0	0	0.820096	0.282227	ACVRL1;HFE;BMPR1A
calcium ion homeostasis (GO:0055074)	3/87	0.70883	0.936012	0	0	0.820096	0.282227	GCM2;ATP2B4;CCR2
cellular response to cadmium ion (GO:0071276)	1/29	0.70949	0.936012	0	0	0.820528	0.281612	NCF1
very long-chain fatty acid metabolic process (GO:0000038)	1/29	0.70949	0.936012	0	0	0.820528	0.281612	ABCD2
synaptic vesicle endocytosis (GO:0048488)	1/29	0.70949	0.936012	0	0	0.820528	0.281612	ITSN1
TRIF-dependent toll-like receptor signaling pathway (GO:0035666)	1/29	0.70949	0.936012	0	0	0.820528	0.281612	IKBKE
cortical cytoskeleton organization (GO:0030865)	1/29	0.70949	0.936012	0	0	0.820528	0.281612	FMNL2
positive regulation of myeloid cell differentiation (GO:0045639)	1/29	0.70949	0.936012	0	0	0.820528	0.281612	HSPA1A
positive regulation of histone modification (GO:0031058)	1/29	0.70949	0.936012	0	0	0.820528	0.281612	BRCA1
regulation of chromosome segregation (GO:0051983)	1/29	0.70949	0.936012	0	0	0.820528	0.281612	HORMAD1
B cell proliferation (GO:0042100)	1/29	0.70949	0.936012	0	0	0.820528	0.281612	GAPT
synaptic vesicle recycling (GO:0036465)	1/29	0.70949	0.936012	0	0	0.820528	0.281612	ITSN1
regulation of activated T cell proliferation (GO:0046006)	1/29	0.70949	0.936012	0	0	0.820528	0.281612	IL23R
skeletal muscle organ development (GO:0060538)	1/29	0.70949	0.936012	0	0	0.820528	0.281612	DISP1
positive regulation of macromolecule biosynthetic process (GO:0010557)	5/142	0.710839	0.936025	0	0	0.837743	0.285929	PDGFRB;NLRP12;HGF;NR1H3;F2
cell junction assembly (GO:0034329)	2/59	0.711421	0.936025	0	0	0.805879	0.274394	LIM2;CDH12
regulation of extrinsic apoptotic signaling pathway (GO:2001236)	2/59	0.711421	0.936025	0	0	0.805879	0.274394	DEPTOR;GPER1
sterol metabolic process (GO:0016125)	2/59	0.711421	0.936025	0	0	0.805879	0.274394	CYP1B1;CYP17A1
dicarboxylic acid metabolic process (GO:0043648)	2/59	0.711421	0.936025	0	0	0.805879	0.274394	IDH1;OGDH
cellular protein localization (GO:0034613)	12/327	0.715139	0.936025	0	0	0.873642	0.292913	TBC1D8B;TBCK;RAB40B;STX19;LRRK2;SH3PXD2B;TMED7-TICAM2;RAB39A;IFT27;ARFIP1;VPS45;RAB40AL
positive regulation of protein complex assembly (GO:0031334)	3/88	0.716103	0.936025	0	0	0.810406	0.27062	AIM2;CDC42EP2;CD36
axonogenesis (GO:0007409)	8/223	0.716704	0.936025	0	0	0.853697	0.28436	DAB1;UNC5A;SEMA3C;LRRN2;GPC1;SEMA3A;EPHB2;GFRA2
cellular response to cytokine stimulus (GO:0071345)	17/456	0.716784	0.936025	0	0	0.887627	0.295563	IL32;CSF1R;FLT3;IL23R;HGF;PTAFR;ALOX15;LRRC3;IL5RA;BRCA1;CXCL10;HCK;NLRP12;GPER1;CHAD;CD36;CCR2
sphingolipid metabolic process (GO:0006665)	4/116	0.718013	0.936025	0	0	0.81988	0.271599	FUT7;SPTSSB;SGMS2;ARSD
cell chemotaxis (GO:0060326)	2/60	0.720104	0.936025	0	0	0.791943	0.260042	PDGFRB;HGF
positive regulation of protein binding (GO:0032092)	2/60	0.720104	0.936025	0	0	0.791943	0.260042	HFE;LRRK2
membrane lipid biosynthetic process (GO:0046467)	2/60	0.720104	0.936025	0	0	0.791943	0.260042	SPTSSB;SGMS2
regulation of protein insertion into mitochondrial membrane involved in apoptotic signaling pathway (GO:1900739)	1/30	0.721622	0.936025	0	0	0.792193	0.258456	TP63
negative regulation of stress-activated MAPK cascade (GO:0032873)	1/30	0.721622	0.936025	0	0	0.792193	0.258456	FKTN
regulation of cell migration involved in sprouting angiogenesis (GO:0090049)	1/30	0.721622	0.936025	0	0	0.792193	0.258456	HDAC9
replication fork processing (GO:0031297)	1/30	0.721622	0.936025	0	0	0.792193	0.258456	SMARCAL1
connective tissue development (GO:0061448)	1/30	0.721622	0.936025	0	0	0.792193	0.258456	SH3PXD2B
acylglycerol catabolic process (GO:0046464)	1/30	0.721622	0.936025	0	0	0.792193	0.258456	LPL
regulation of leukocyte chemotaxis (GO:0002688)	1/30	0.721622	0.936025	0	0	0.792193	0.258456	CXCL10
negative regulation of secretion by cell (GO:1903531)	1/30	0.721622	0.936025	0	0	0.792193	0.258456	LILRB1
negative regulation of DNA biosynthetic process (GO:2000279)	1/30	0.721622	0.936025	0	0	0.792193	0.258456	ACVRL1
MyD88-independent toll-like receptor signaling pathway (GO:0002756)	1/30	0.721622	0.936025	0	0	0.792193	0.258456	IKBKE
protein localization to lysosome (GO:0061462)	1/30	0.721622	0.936025	0	0	0.792193	0.258456	LARS
positive regulation of phospholipase C activity (GO:0010863)	1/30	0.721622	0.936025	0	0	0.792193	0.258456	PDGFRB
aminoglycan metabolic process (GO:0006022)	1/30	0.721622	0.936025	0	0	0.792193	0.258456	GPC1
positive regulation of protein insertion into mitochondrial membrane involved in apoptotic signaling pathway (GO:1900740)	1/30	0.721622	0.936025	0	0	0.792193	0.258456	TP63
response to estradiol (GO:0032355)	1/30	0.721622	0.936025	0	0	0.792193	0.258456	GPER1
regulation of blood coagulation (GO:0030193)	1/30	0.721622	0.936025	0	0	0.792193	0.258456	F2
positive regulation of B cell proliferation (GO:0030890)	1/30	0.721622	0.936025	0	0	0.792193	0.258456	FCRL3
bile acid metabolic process (GO:0008206)	1/30	0.721622	0.936025	0	0	0.792193	0.258456	HSD17B4
positive regulation of reactive oxygen species biosynthetic process (GO:1903428)	1/30	0.721622	0.936025	0	0	0.792193	0.258456	CD36
peptidyl-threonine modification (GO:0018210)	3/89	0.723234	0.937624	0	0	0.80094	0.259523	LRRK2;CHEK2;GALNTL6
regulation of apoptotic process (GO:0042981)	31/815	0.728425	0.938042	0	0	0.905155	0.286817	CSF1R;FLT3;ITSN1;CHM;BRCA1;NLRC4;FGD2;GPER1;CHEK2;FFAR4;CYP1B1;EPHB2;TP63;AAMDC;MAP2K6;PDGFRB;GZMA;ANXA4;HGF;SIGMAR1;TNFRSF10C;CIDEB;DHCR24;LILRB1;MERTK;USP17L2;HCK;NLRP12;WNK3;MNDA;HSPA1A
regulation of vesicle fusion (GO:0031338)	2/61	0.728566	0.938042	0	0	0.778479	0.246527	TBC1D8B;TBCK
positive regulation of T cell proliferation (GO:0042102)	2/61	0.728566	0.938042	0	0	0.778479	0.246527	IL23R;CCR2
glycosaminoglycan metabolic process (GO:0030203)	2/61	0.728566	0.938042	0	0	0.778479	0.246527	UGDH;GPC1
negative regulation of MAP kinase activity (GO:0043407)	2/61	0.728566	0.938042	0	0	0.778479	0.246527	SPRED1;RGS14
cell-matrix adhesion (GO:0007160)	3/90	0.730225	0.938042	0	0	0.791693	0.248911	ITGA3;ITGA10;LYVE1
plasma membrane bounded cell projection organization (GO:0120036)	4/118	0.730384	0.938042	0	0	0.805411	0.253048	CSF1R;GPM6A;UNC5A;TBC1D24
cytosolic transport (GO:0016482)	4/118	0.730384	0.938042	0	0	0.805411	0.253048	ARFRP1;HOOK2;HEATR5A;CLTCL1
negative regulation of cell-cell adhesion (GO:0022408)	1/31	0.733248	0.938042	0	0	0.765746	0.237589	PLG
negative regulation of blood vessel endothelial cell migration (GO:0043537)	1/31	0.733248	0.938042	0	0	0.765746	0.237589	ACVRL1
regulation of glucose import (GO:0046324)	1/31	0.733248	0.938042	0	0	0.765746	0.237589	CLTCL1
positive regulation of protein dephosphorylation (GO:0035307)	1/31	0.733248	0.938042	0	0	0.765746	0.237589	PDGFRB
regulation of protein tyrosine kinase activity (GO:0061097)	1/31	0.733248	0.938042	0	0	0.765746	0.237589	CSF1R
renal water homeostasis (GO:0003091)	1/31	0.733248	0.938042	0	0	0.765746	0.237589	MYO5B
negative regulation of extrinsic apoptotic signaling pathway via death domain receptors (GO:1902042)	1/31	0.733248	0.938042	0	0	0.765746	0.237589	BRCA1
regulation of protein autophosphorylation (GO:0031952)	1/31	0.733248	0.938042	0	0	0.765746	0.237589	NLRP12
cofactor biosynthetic process (GO:0051188)	1/31	0.733248	0.938042	0	0	0.765746	0.237589	MOCS1
response to cadmium ion (GO:0046686)	1/31	0.733248	0.938042	0	0	0.765746	0.237589	NCF1
sarcomere organization (GO:0045214)	1/31	0.733248	0.938042	0	0	0.765746	0.237589	MYOM2
regulation of neuron projection development (GO:0010975)	4/119	0.736415	0.938042	0	0	0.798366	0.244269	SEMA3A;SPOCK1;SERPINI1;S100A9
positive regulation of type I interferon production (GO:0032481)	2/62	0.73681	0.938042	0	0	0.765465	0.233793	DDX58;POLR3GL
regulation of actin filament-based process (GO:0032970)	2/62	0.73681	0.938042	0	0	0.765465	0.233793	ARHGAP44;PDGFRB
negative regulation of intrinsic apoptotic signaling pathway (GO:2001243)	2/62	0.73681	0.938042	0	0	0.765465	0.233793	LRRK2;HSPA1A
cellular protein catabolic process (GO:0044257)	2/62	0.73681	0.938042	0	0	0.765465	0.233793	CHEK2;GZMA
second-messenger-mediated signaling (GO:0019932)	2/62	0.73681	0.938042	0	0	0.765465	0.233793	LRRK2;CD36
lipid transport (GO:0006869)	3/91	0.737076	0.938042	0	0	0.782655	0.238761	CEACAM1;ATP8B1;SLCO2B1
positive regulation of cellular protein metabolic process (GO:0032270)	3/91	0.737076	0.938042	0	0	0.782655	0.238761	UQCC2;ATG10;NR1H3
cellular response to acid chemical (GO:0071229)	3/91	0.737076	0.938042	0	0	0.782655	0.238761	WNT5B;LARS;FZD4
phospholipase C-activating G-protein coupled receptor signaling pathway (GO:0007200)	3/91	0.737076	0.938042	0	0	0.782655	0.238761	CXCR2;TACR1;F2RL2
regulation of cell growth (GO:0001558)	7/201	0.737908	0.938042	0	0	0.827759	0.251586	ACVRL1;CEACAM1;SPOCK1;PRSS2;S100A9;S100A8;HSPA1A
positive regulation of apoptotic process (GO:0043065)	11/307	0.738223	0.938042	0	0	0.852066	0.258609	CARD8;GPER1;GZMA;ITSN1;CYP1B1;SIK1;LILRB1;MNDA;NLRC4;TP63;FGD2
regulation of protein kinase activity (GO:0045859)	5/147	0.738757	0.938042	0	0	0.808033	0.244662	SPRED1;CEACAM1;DEPTOR;CHAD;LRRC3
macromolecular complex assembly (GO:0065003)	4/120	0.742344	0.938042	0	0	0.791442	0.235804	DET1;HFE;SH3BGR;SKAP2
positive regulation of cellular metabolic process (GO:0031325)	3/92	0.743788	0.938042	0	0	0.773821	0.22905	PDGFRB;NR1H3;F2
dendrite morphogenesis (GO:0048813)	1/32	0.744389	0.938042	0	0	0.741006	0.218739	EPHB2
protein deacetylation (GO:0006476)	1/32	0.744389	0.938042	0	0	0.741006	0.218739	HDAC9
cellular response to amino acid stimulus (GO:0071230)	1/32	0.744389	0.938042	0	0	0.741006	0.218739	LARS
phosphatidylcholine biosynthetic process (GO:0006656)	1/32	0.744389	0.938042	0	0	0.741006	0.218739	SLC44A5
central nervous system neuron differentiation (GO:0021953)	1/32	0.744389	0.938042	0	0	0.741006	0.218739	SPOCK1
sister chromatid segregation (GO:0000819)	1/32	0.744389	0.938042	0	0	0.741006	0.218739	CEP57L1
ceramide biosynthetic process (GO:0046513)	1/32	0.744389	0.938042	0	0	0.741006	0.218739	SGMS2
cyclic-nucleotide-mediated signaling (GO:0019935)	1/32	0.744389	0.938042	0	0	0.741006	0.218739	CD36
GPI anchor biosynthetic process (GO:0006506)	1/32	0.744389	0.938042	0	0	0.741006	0.218739	PIGZ
positive regulation of TOR signaling (GO:0032008)	1/32	0.744389	0.938042	0	0	0.741006	0.218739	LARS
activation of adenylate cyclase activity (GO:0007190)	1/32	0.744389	0.938042	0	0	0.741006	0.218739	TSHR
mitochondrial transmembrane transport (GO:1990542)	1/32	0.744389	0.938042	0	0	0.741006	0.218739	SLC25A20
endodermal cell differentiation (GO:0035987)	1/32	0.744389	0.938042	0	0	0.741006	0.218739	MMP8
negative regulation of fat cell differentiation (GO:0045599)	1/32	0.744389	0.938042	0	0	0.741006	0.218739	GPER1
G2 DNA damage checkpoint (GO:0031572)	1/32	0.744389	0.938042	0	0	0.741006	0.218739	BRCA1
positive regulation of transcription factor import into nucleus (GO:0042993)	1/32	0.744389	0.938042	0	0	0.741006	0.218739	DDX58
regulation of erythrocyte differentiation (GO:0045646)	1/32	0.744389	0.938042	0	0	0.741006	0.218739	HSPA1A
aminoglycan catabolic process (GO:0006026)	1/32	0.744389	0.938042	0	0	0.741006	0.218739	GPC1
positive regulation of myeloid leukocyte differentiation (GO:0002763)	1/32	0.744389	0.938042	0	0	0.741006	0.218739	IL23R
adenylate cyclase-inhibiting G-protein coupled receptor signaling pathway (GO:0007193)	2/63	0.744839	0.938042	0	0	0.752877	0.221788	OPRL1;MCHR1
iron ion homeostasis (GO:0055072)	2/63	0.744839	0.938042	0	0	0.752877	0.221788	HFE;CYBRD1
positive regulation of cell projection organization (GO:0031346)	2/63	0.744839	0.938042	0	0	0.752877	0.221788	SERPINI1;S100A9
regulation of autophagy (GO:0010506)	7/203	0.74708	0.938042	0	0	0.819226	0.238872	TMEM150B;LARS;HGF;LRRK2;ZKSCAN3;ATP6V1E2;TMEM150C
negative regulation of signal transduction (GO:0009968)	10/283	0.747097	0.938042	0	0	0.839868	0.244872	PDGFRB;CSF1R;NLRP12;FLT3;GPC1;CARD8;LRRK2;RPGRIP1L;EPHB2;MERTK
regulation of acute inflammatory response (GO:0002673)	4/121	0.748171	0.938042	0	0	0.784636	0.227642	C1QB;DNASE1;F2;C1QC
positive regulation of programmed cell death (GO:0043068)	9/257	0.749115	0.938042	0	0	0.83217	0.240383	LRRK2;GPER1;GZMA;ITSN1;CYP1B1;LILRB1;MNDA;NLRC4;FGD2
apoptotic process (GO:0006915)	8/231	0.751992	0.938042	0	0	0.822723	0.2345	GSDMA;CASP5;GZMA;CIDEB;DHCR24;BRCA1;ALOX15B;TP63
positive regulation of MAP kinase activity (GO:0043406)	6/177	0.752234	0.938042	0	0	0.804941	0.229173	PDGFRB;FLT3;LRRK2;CXCL17;SASH1;MAP2K6
inorganic anion transmembrane transport (GO:0098661)	2/64	0.752657	0.938042	0	0	0.740695	0.210465	SLC26A8;SLC1A3
positive regulation of endocytosis (GO:0045807)	2/64	0.752657	0.938042	0	0	0.740695	0.210465	HFE;MERTK
negative regulation of neuron differentiation (GO:0045665)	2/64	0.752657	0.938042	0	0	0.740695	0.210465	SEMA3A;SPOCK1
positive regulation of cell adhesion (GO:0045785)	2/64	0.752657	0.938042	0	0	0.740695	0.210465	ALOX15;PRSS2
sulfur compound biosynthetic process (GO:0044272)	4/122	0.753896	0.938042	0	0	0.777946	0.21977	GSTM4;GSTM1;GLCE;UST
glycogen metabolic process (GO:0005977)	1/33	0.755065	0.938042	0	0	0.717812	0.201671	STBD1
positive regulation of adenylate cyclase activity (GO:0045762)	1/33	0.755065	0.938042	0	0	0.717812	0.201671	TSHR
activation of MAPKK activity (GO:0000186)	1/33	0.755065	0.938042	0	0	0.717812	0.201671	LRRK2
positive regulation of cytokine-mediated signaling pathway (GO:0001961)	1/33	0.755065	0.938042	0	0	0.717812	0.201671	HSPA1A
protein acetylation (GO:0006473)	1/33	0.755065	0.938042	0	0	0.717812	0.201671	EHHADH
chemical synaptic transmission, postsynaptic (GO:0099565)	1/33	0.755065	0.938042	0	0	0.717812	0.201671	LRRK2
oligosaccharide biosynthetic process (GO:0009312)	1/33	0.755065	0.938042	0	0	0.717812	0.201671	GALNTL6
stem cell differentiation (GO:0048863)	1/33	0.755065	0.938042	0	0	0.717812	0.201671	GPM6A
response to exogenous dsRNA (GO:0043330)	1/33	0.755065	0.938042	0	0	0.717812	0.201671	DDX58
positive regulation of cell-matrix adhesion (GO:0001954)	1/33	0.755065	0.938042	0	0	0.717812	0.201671	CD36
regulation of autophagosome assembly (GO:2000785)	1/33	0.755065	0.938042	0	0	0.717812	0.201671	LRRK2
regulation of postsynaptic membrane potential (GO:0060078)	1/33	0.755065	0.938042	0	0	0.717812	0.201671	LRRK2
positive regulation of catalytic activity (GO:0043085)	1/33	0.755065	0.938042	0	0	0.717812	0.201671	XRCC4
exonucleolytic nuclear-transcribed mRNA catabolic process involved in deadenylation-dependent decay (GO:0043928)	1/33	0.755065	0.938042	0	0	0.717812	0.201671	EXOSC5
negative regulation of multi-organism process (GO:0043901)	1/33	0.755065	0.938042	0	0	0.717812	0.201671	CARD8
regulation of intracellular protein transport (GO:0033157)	1/33	0.755065	0.938042	0	0	0.717812	0.201671	PRR5L
cellular response to fibroblast growth factor stimulus (GO:0044344)	3/94	0.756803	0.939257	0	0	0.756734	0.210866	KL;SPRED1;ESRP1
vesicle fusion (GO:0006906)	3/94	0.756803	0.939257	0	0	0.756734	0.210866	SAMD9L;STX19;RAB39A
positive regulation of protein modification by small protein conjugation or removal (GO:1903322)	2/65	0.760268	0.940818	0	0	0.7289	0.19978	LRRK2;BRCA1
negative regulation of apoptotic signaling pathway (GO:2001234)	2/65	0.760268	0.940818	0	0	0.7289	0.19978	HGF;HSPA1A
positive regulation of signal transduction (GO:0009967)	7/206	0.760409	0.940818	0	0	0.806748	0.220967	GPER1;ASXL2;BMP2K;TLR5;DISC1;TP63;SASH1
dephosphorylation (GO:0016311)	4/124	0.765045	0.940818	0	0	0.7649	0.204855	DUSP23;PTPRB;HDHD2;STYXL1
organic anion transport (GO:0015711)	4/124	0.765045	0.940818	0	0	0.7649	0.204855	SLC22A3;SLCO2B1;SLC26A8;SLC4A4
positive regulation of leukocyte migration (GO:0002687)	1/34	0.765295	0.940818	0	0	0.696024	0.186182	CXCL10
negative regulation of DNA binding (GO:0043392)	1/34	0.765295	0.940818	0	0	0.696024	0.186182	GZMA
[truncated: 473 more rows]

## Sheet: B
Table S3_GO Biological Process_LUAD PBMC vs HD PBMC_down genes
Term	Overlap	P.value	Adjusted.P.value	Old.P.value	Old.Adjusted.P.value	Odds.Ratio	Combined.Score	Genes
regulation of p38MAPK cascade (GO:1900744)	8/26	5.78287e-08	0.000127501	0	0	20.0575	334.274	PER1;DUSP10;GADD45B;GADD45A;IL1B;ZC3H12A;GADD45G;VEGFA
cellular response to cytokine stimulus (GO:0071345)	30/456	1.13536e-07	0.000127501	0	0	3.27833	52.4243	CDKN1A;CXCR4;CXCL1;HIF1A;CXCL2;IL1RL2;CCL7;IRAK2;ZC3H12A;DPYSL3;NKX3-1;IL10;CCL24;CCL20;IL1R1;PDE2A;WNT5A;LIF;OSM;GAB2;IL2;EREG;VEGFA;IL1A;DCSTAMP;PIK3CA;IL1B;TNFRSF21;STX1A;CRLF2
regulation of transcription from RNA polymerase II promoter (GO:0006357)	61/1478	1.53225e-06	0.000924735	0	0	2.05524	27.5171	FOXA1;CDKN1A;GMEB2;SERPINE1;CHRDL1;CHD1;EDNRB;HEY1;ZC3H12A;NAMPT;HOXA5;NKX3-1;TGIF1;RIPK2;FST;WNT5A;ARID5A;MED26;HIC1;TOX2;DDIT3;ERF;CRY1;MET;ATF3;FOXC2;GCM1;ZNF395;BEX1;CREM;HIF1A;RELB;DDN;DLL4;ZNF704;HSF2;NRIP1;ZNF821;HES1;SKIL;PLK3;JAG1;GDF15;SMURF1;PDE2A;LIF;OSM;INHBA;SMAD6;FOSL2;VEGFA;SMAD7;FOSL1;MLXIPL;PER1;RGCC;NR4A3;MAFF;BHLHE40;SNAI1;SP8
positive regulation of p38MAPK cascade (GO:1900745)	6/18	1.6469e-06	0.000924735	0	0	22.4678	299.195	GADD45B;GADD45A;IL1B;ZC3H12A;GADD45G;VEGFA
positive regulation of angiogenesis (GO:0045766)	12/103	2.84032e-06	0.00108651	0	0	5.98417	76.4274	IL1A;FOXC2;IL1B;SERPINE1;ZC3H12A;WNT5A;FGF18;VASH2;HIF1A;THBS1;HK2;VEGFA
positive regulation of cell proliferation (GO:0008284)	26/424	2.96985e-06	0.00108651	0	0	3.0162	38.3872	CDKN1A;THBS1;DLL4;FGF9;SERTAD1;NAMPT;HES1;NKX3-1;NTRK2;WNT5A;LIF;OSM;GAB2;IL2;EREG;VEGFA;FOSL1;MLXIPL;NR4A3;BAMBI;IL1B;SPDYA;FGFR4;HBEGF;CRLF2;DDR2
regulation of cell proliferation (GO:0042127)	37/740	3.38627e-06	0.00108651	0	0	2.45649	30.9414	BTG3;CDKN1A;CXCL1;CXCL3;CXCL2;THBS1;DLL4;FGF9;SERTAD1;NAMPT;HES1;NKX3-1;IL10;NTRK2;JAG1;LIF;OSM;GAB2;INHBA;SMAD6;IL2;EREG;VEGFA;FOSL1;MLXIPL;IL1A;RGCC;NR4A3;BAMBI;IL1B;ALDH1A2;BHLHE40;SPDYA;FGFR4;TNFRSF21;HBEGF;CRLF2
positive regulation of kinase activity (GO:0033674)	12/113	7.52759e-06	0.00187789	0	0	5.38891	63.5726	NTRK2;CDKN1A;TRAF4;EEF1A2;SPDYA;ROR1;SNX9;FGFR4;MET;CAMKK1;EREG;DDR2
regulation of cell migration (GO:0030334)	21/316	7.95122e-06	0.00187789	0	0	3.26508	38.3392	CCL24;SEMA7A;JAG1;SERPINE1;SEMA3B;STC1;SEMA3F;THBS1;VEGFA;CXCL16;SMAD7;RND1;COL1A1;DUSP10;WNT11;CCL7;PLAU;IL1B;DPYSL3;SNAI1;HBEGF
positive regulation of transcription, DNA-templated (GO:0045893)	48/1120	8.36104e-06	0.00187789	0	0	2.1063	24.6267	FOXA1;FOXC2;GCM1;CASZ1;BEX1;SERPINE1;HIF1A;RELB;DDN;SEC14L2;WNT11;HEY1;TP53INP2;HSF2;ZC3H12A;NAMPT;CHEK1;NRIP1;ZNF821;HES1;HOXA5;NKX3-1;IL10;JAG1;RIPK2;FZD7;WNT5A;LIF;OSM;INHBA;POU3F1;FOSL2;VEGFA;SMAD7;COL1A1;FOSL1;MLXIPL;PER1;TOX2;RGCC;NR4A3;BAMBI;DDIT3;IL1B;MAFF;SNAI1;MET;ATF3
positive regulation of cell motility (GO:2000147)	15/179	1.07324e-05	0.00219137	0	0	4.16416	47.6473	CCL24;SEMA7A;SEMA3B;SEMA3F;THBS1;CXCL16;VEGFA;COL1A1;WNT11;CCL7;PLAU;IL1B;SPOCK2;SNAI1;HBEGF
fibrinolysis (GO:0042730)	5/16	1.82073e-05	0.0029159	0	0	20.3795	222.415	SERPINB2;PLAU;SERPINE1;PLAUR;PLAT
negative regulation of signal transduction (GO:0009968)	19/283	1.85669e-05	0.0029159	0	0	3.29065	35.8488	NTRK2;TNFAIP3;NRARP;THBS1;HIC1;EREG;DLL4;HEY1;IL1B;DDIT4;CRY1;DACT3;ROR1;SPRY1;FGFR4;MET;DDR2;HBEGF;NKX3-1
positive regulation of vasculature development (GO:1904018)	11/104	1.87101e-05	0.0029159	0	0	5.35449	58.2914	IL1A;IL1B;SERPINE1;ZC3H12A;WNT5A;FGF18;VASH2;HIF1A;THBS1;HK2;VEGFA
regulation of peptidyl-serine phosphorylation (GO:0033135)	10/86	1.9474e-05	0.0029159	0	0	5.94792	64.5137	SPTBN4;MLXIPL;RIPK2;PDE4D;DDIT4;LIF;OSM;DMD;VEGFA;SMAD7
negative regulation of B cell activation (GO:0050869)	5/17	2.53277e-05	0.00355537	0	0	18.6802	197.704	IL10;TNFAIP3;INHBA;SAMSN1;TNFRSF21
Notch signaling involved in heart development (GO:0061314)	4/9	2.69117e-05	0.00355551	0	0	35.7968	376.688	DLL4;JAG1;HEY1;SNAI1
cytokine-mediated signaling pathway (GO:0019221)	31/633	3.18885e-05	0.00386714	0	0	2.38095	24.6506	CDKN1A;CAMK2A;CXCL1;CXCL3;HIF1A;CXCL2;OASL;IL1RL2;CCL7;IRAK2;IL10;CCL24;SERPINB2;TNFRSF12A;RIPK2;CCL20;IL1R1;LIF;OSM;GAB2;IL2;EREG;VEGFA;IL1A;PIK3CA;IL1B;TNFSF9;ACKR3;TNFRSF21;STX1A;CRLF2
positive regulation of cell migration (GO:0030335)	16/221	3.40611e-05	0.00386714	0	0	3.55425	36.5638	CCL24;SEMA7A;SEMA3B;SEMA3F;HIF1A;THBS1;VEGFA;CXCL16;COL1A1;WNT11;CCL7;PLAU;IL1B;SNAI1;DDR2;HBEGF
negative regulation of peptidyl-serine phosphorylation (GO:0033137)	5/18	3.44358e-05	0.00386714	0	0	17.2424	177.19	MLXIPL;PDE4D;DDIT4;DMD;SMAD7
regulation of angiogenesis (GO:0045765)	14/177	3.99953e-05	0.00427759	0	0	3.90144	39.5089	SERPINE1;WNT5A;VASH2;TNFAIP3;HIF1A;THBS1;HK2;VEGFA;IL1A;RGCC;IL1B;ZC3H12A;FGF18;HOXA5
endothelial cell development (GO:0001885)	5/19	4.58906e-05	0.00468502	0	0	16.01	159.928	PPP1R16B;PDE4D;PDE2A;STC1;MET
positive regulation of leukocyte chemotaxis (GO:0002690)	8/61	5.54945e-05	0.00530166	0	0	6.79977	66.6325	CCL7;SERPINE1;WNT5A;CXCL1;CXCL3;CXCL2;THBS1;VEGFA
regulation of endothelial cell proliferation (GO:0001936)	9/79	5.96604e-05	0.00530166	0	0	5.8003	56.4186	PPP1R16B;CCL24;RGCC;WNT5A;VASH2;NRARP;THBS1;HIF1A;VEGFA
neuron differentiation (GO:0030182)	12/139	6.06714e-05	0.00530166	0	0	4.27994	41.5584	FOXA1;NTRK2;WNT11;TUBB3;FZD7;WNT5A;DDIT4;ID1;ID3;INHBA;SKIL;VEGFA
positive regulation of phosphorylation (GO:0042327)	15/208	6.22946e-05	0.00530166	0	0	3.53317	34.2139	NTRK2;PFKFB3;FZD7;PLAUR;HIF1A;THBS1;EREG;VEGFA;MLXIPL;IL1B;ROR1;FGFR4;MET;DDR2;NKX3-1
positive regulation of stress-activated MAPK cascade (GO:0032874)	9/80	6.5932e-05	0.00530166	0	0	5.71831	55.0495	IL1A;TRAF4;GADD45B;GADD45A;IL1B;FZD7;ZC3H12A;VEGFA;GADD45G
regulation of blood vessel endothelial cell proliferation involved in sprouting angiogenesis (GO:1903587)	4/11	6.80499e-05	0.00530166	0	0	25.5665	245.318	PPP1R16B;DLL4;THBS1;VEGFA
positive regulation of intracellular signal transduction (GO:1902533)	25/479	6.84542e-05	0.00530166	0	0	2.52894	24.2508	THBS1;RASD2;WNT11;FGF9;PMAIP1;NKX3-1;NTRK2;RIPK2;PLK2;WNT5A;LIF;OSM;ADRA2B;EREG;VEGFA;IL1A;GH1;PIK3CA;FGF18;ROR1;FGFR4;MET;HBEGF;CRLF2;DDR2
positive regulation of MAPK cascade (GO:0043410)	18/289	8.12611e-05	0.00608375	0	0	3.02866	28.5234	CCL24;NTRK2;SEMA7A;ARHGAP8;CCL20;LIF;OSM;ADRA2B;VEGFA;IL1A;GH1;CCL7;FGF18;ACKR3;ROR1;FGFR4;MET;DDR2
positive regulation of cellular process (GO:0048522)	26/519	9.60437e-05	0.00695852	0	0	2.42291	22.4137	THBS1;CXCL16;FGF9;SERTAD1;ZC3H12A;NAMPT;CHEK1;HES1;NKX3-1;NTRK2;RIPK2;ACTN2;LIF;OSM;GAB2;IL2;EREG;VEGFA;FOSL1;MLXIPL;BAMBI;IL1B;SPDYA;FGFR4;HBEGF;CRLF2
negative regulation of blood coagulation (GO:0030195)	6/36	0.000123459	0.00856198	0	0	8.97885	80.8061	THBD;SERPINB2;PLAU;SERPINE1;PLAUR;PLAT
regulation of ERK1 and ERK2 cascade (GO:0070372)	16/247	0.000127372	0.00856198	0	0	3.14997	28.2502	DUSP4;CCL24;NTRK2;SEMA7A;ARHGAP8;CCL20;IL1A;DUSP10;CCL7;IL1B;ACKR3;ROR1;SPRY1;FGFR4;MET;DDR2
positive regulation of protein phosphorylation (GO:0001934)	22/412	0.000133915	0.00856198	0	0	2.58074	23.0158	NTRK2;CDKN1A;RIPK2;GDF15;LIF;OSM;PLAUR;INHBA;ADRA2B;CAMKK1;EREG;VEGFA;GH1;TRAF4;IL1B;SPDYA;ROR1;SNX9;FGFR4;MET;NKX3-1;DDR2
chemokine-mediated signaling pathway (GO:0070098)	7/52	0.000137236	0.00856198	0	0	6.99427	62.2057	CCL24;CCL7;CCL20;ACKR3;CXCL1;CXCL3;CXCL2
positive regulation of mitotic cell cycle (GO:0045931)	7/52	0.000137236	0.00856198	0	0	6.99427	62.2057	FOXA1;IL1A;RGCC;IL1B;HES1;NKX3-1;EREG
negative regulation of hormone secretion (GO:0046888)	4/13	0.000142359	0.00864157	0	0	19.883	176.107	IL1B;LIF;OSM;ADRA2B
positive regulation of endothelial cell migration (GO:0010595)	8/70	0.000149687	0.00884726	0	0	5.81003	51.1687	FOXC2;ZC3H12A;WNT5A;FGF18;MET;THBS1;HIF1A;VEGFA
inflammatory response (GO:0006954)	16/252	0.000160428	0.00906282	0	0	3.08243	26.9333	IL10;AOC3;CCL24;RIPK2;CCL20;CXCR4;CXCL1;CXCL3;CXCL2;THBS1;RELB;IL1A;PIK3CA;CCL7;IL1B;TNFRSF21
positive regulation of multicellular organismal process (GO:0051240)	14/202	0.00016529	0.00906282	0	0	3.37827	29.4173	SERPINE1;WNT5A;INHBA;METRNL;HIF1A;IL2;EREG;COL1A1;HCAR2;GH1;RGCC;BAMBI;IL1B;SNAI1
regulation of JNK cascade (GO:0046328)	9/90	0.000165439	0.00906282	0	0	5.00977	43.6196	IL1A;PER1;DUSP10;TRAF4;GADD45B;GADD45A;IL1B;FZD7;GADD45G
cell surface receptor signaling pathway involved in heart development (GO:0061311)	4/14	0.000195841	0.00989555	0	0	17.8938	152.781	DLL4;JAG1;HEY1;SNAI1
negative regulation of cellular response to growth factor stimulus (GO:0090288)	7/55	0.000196677	0.00989555	0	0	6.55612	55.9495	SMURF1;SPRY1;SMAD6;NBL1;THBS1;SKIL;SMAD7
positive regulation of extrinsic apoptotic signaling pathway via death domain receptors (GO:1902043)	3/6	0.000202669	0.00989555	0	0	44.6484	379.687	PMAIP1;THBS1;ATF3
positive regulation of myeloid leukocyte cytokine production involved in immune response (GO:0061081)	3/6	0.000202669	0.00989555	0	0	44.6484	379.687	SEMA7A;NR4A3;WNT5A
regulation of response to wounding (GO:1903034)	3/6	0.000202669	0.00989555	0	0	44.6484	379.687	IL10;TNFRSF12A;PLAU
response to interleukin-1 (GO:0070555)	8/76	0.000266527	0.0127366	0	0	5.29575	43.5842	CCL24;CCL7;IL1R1;IRAK2;CCL20;ZC3H12A;HIF1A;NKX3-1
negative regulation of transmembrane receptor protein serine/threonine kinase signaling pathway (GO:0090101)	8/77	0.000291793	0.0136535	0	0	5.21873	42.4777	SMURF1;BAMBI;FST;PMEPA1;SMAD6;NBL1;SKIL;SMAD7
positive regulation of transcription from RNA polymerase II promoter (GO:0045944)	35/848	0.000298375	0.0136765	0	0	1.98774	16.1348	FOXA1;FOXC2;GCM1;BEX1;SERPINE1;HIF1A;RELB;DDN;HEY1;HSF2;ZC3H12A;NAMPT;NRIP1;ZNF821;HES1;HOXA5;NKX3-1;JAG1;RIPK2;WNT5A;LIF;OSM;INHBA;FOSL2;VEGFA;SMAD7;MLXIPL;PER1;TOX2;RGCC;NR4A3;DDIT3;MAFF;MET;ATF3
positive regulation of sequence-specific DNA binding transcription factor activity (GO:0051091)	14/215	0.000314546	0.0140477	0	0	3.15765	25.4645	IL10;FOXA1;BEX1;RIPK2;WNT5A;CAMK2A;VEGFA;RGCC;SMO;IRAK2;DDIT3;IL1B;ROR1;DDR2
negative regulation of cell communication (GO:0010648)	8/78	0.000318981	0.0140477	0	0	5.14391	41.4104	NTRK2;IL1B;LIF;OSM;ROR1;FGFR4;MET;DDR2
positive regulation of extrinsic apoptotic signaling pathway (GO:2001238)	5/28	0.000329359	0.0142258	0	0	9.74073	78.1047	TNFRSF12A;PMAIP1;G0S2;INHBA;THBS1
positive regulation of protein kinase C signaling (GO:0090037)	3/7	0.000348865	0.0142464	0	0	33.4846	266.565	WNT11;WNT5A;VEGFA
activation of MAPKKK activity (GO:0000185)	3/7	0.000348865	0.0142464	0	0	33.4846	266.565	GADD45B;GADD45A;GADD45G
cAMP catabolic process (GO:0006198)	3/7	0.000348865	0.0142464	0	0	33.4846	266.565	PDE4D;PDE2A;PDE4B
positive regulation of transcription from RNA polymerase II promoter in response to stress (GO:0036003)	5/29	0.000390829	0.015675	0	0	9.33438	73.2492	HSF2;DDIT3;HIF1A;ATF3;VEGFA
positive regulation of macromolecule metabolic process (GO:0010604)	16/276	0.000444599	0.0175188	0	0	2.79443	21.5683	NTRK2;WNT5A;INHBA;POU3F1;HIF1A;VEGFA;DLL4;EPB41L4B;IL1A;RGCC;WNT11;SMO;IL1B;ZC3H12A;FGFR4;NKX3-1
negative regulation of cell proliferation (GO:0008285)	19/363	0.000483334	0.0185657	0	0	2.51491	19.2009	IL10;BTG3;CDKN1A;WNT5A;OSM;TNFAIP3;CXCL1;INHBA;SMAD6;EREG;DLL4;IL1A;RGCC;DUSP10;IL1B;ALDH1A2;BHLHE40;HES1;NKX3-1
negative regulation of signaling (GO:0023057)	8/83	0.0004877	0.0185657	0	0	4.79975	36.602	NTRK2;IL1B;LIF;OSM;ROR1;FGFR4;MET;DDR2
cellular response to interleukin-1 (GO:0071347)	11/150	0.000506053	0.0189433	0	0	3.57403	27.1229	IL1A;CCL24;CCL7;IL1R1;IRAK2;RIPK2;CCL20;IL1B;ZC3H12A;HIF1A;NKX3-1
positive regulation of MAP kinase activity (GO:0043406)	12/177	0.000580456	0.0213612	0	0	3.28782	24.4998	GH1;GADD45B;IRAK2;GADD45A;RIPK2;IL1B;WNT5A;FGF18;CXCR4;THBS1;GADD45G;VEGFA
negative regulation of transcription, DNA-templated (GO:0045892)	33/813	0.000591289	0.0213612	0	0	1.94729	14.4746	FOXC2;ZBTB21;CREM;RELB;DLL4;EDNRB;WNT11;HEY1;NRIP1;HES1;SKIL;NKX3-1;TGIF1;PLK3;FST;PDE2A;WNT5A;ARID5A;HIC1;EREG;VEGFA;SMAD7;MLXIPL;PER1;NR4A3;DDIT3;ID1;BHLHE40;SNAI1;ERF;CRY1;ID3;ATF3
positive regulation of epithelial cell proliferation (GO:0050679)	9/107	0.000604847	0.0213612	0	0	4.13712	30.6583	PPP1R16B;CCL24;NR4A3;FZD7;WNT5A;VASH2;NRARP;HIF1A;VEGFA
negative regulation of mitotic cell cycle (GO:0045930)	6/48	0.000622458	0.0213612	0	0	6.40952	47.314	IL10;BTG3;RGCC;GADD45A;CHEK1;NKX3-1
positive regulation of chemotaxis (GO:0050921)	6/48	0.000622458	0.0213612	0	0	6.40952	47.314	CXCL1;CXCL3;CXCL2;THBS1;MET;VEGFA
negative regulation of BMP signaling pathway (GO:0030514)	5/32	0.000627711	0.0213612	0	0	8.29596	61.1697	SMURF1;SMAD6;SKIL;NBL1;SMAD7
positive regulation of endothelial cell proliferation (GO:0001938)	7/67	0.000672053	0.0225288	0	0	5.24167	38.2913	PPP1R16B;CCL24;WNT5A;VASH2;NRARP;HIF1A;VEGFA
regulation of epithelial to mesenchymal transition (GO:0010717)	7/68	0.000735198	0.0242832	0	0	5.15547	37.1987	FOXA1;COL1A1;RGCC;BAMBI;IL1B;SNAI1;SMAD7
regulation of endothelial cell migration (GO:0010594)	7/69	0.000802946	0.0252243	0	0	5.07206	36.1497	DLL4;FOXC2;ZC3H12A;WNT5A;STC1;THBS1;VEGFA
negative regulation of fibrinolysis (GO:0051918)	3/9	0.000810131	0.0252243	0	0	22.3208	158.886	THBD;SERPINE1;THBS1
cyclic nucleotide catabolic process (GO:0009214)	3/9	0.000810131	0.0252243	0	0	22.3208	158.886	PDE4D;PDE2A;PDE4B
negative regulation of transcription from RNA polymerase II promoter (GO:0000122)	25/565	0.000823099	0.0252243	0	0	2.11661	15.0331	FOXC2;CREM;RELB;DLL4;EDNRB;HEY1;NRIP1;HES1;SKIL;TGIF1;PLK3;FST;PDE2A;ARID5A;HIC1;VEGFA;SMAD7;PER1;NR4A3;DDIT3;BHLHE40;SNAI1;ERF;CRY1;ATF3
regulation of wound healing (GO:0061041)	5/34	0.000836559	0.0252243	0	0	7.72303	54.727	TNFRSF12A;PLAU;SERPINE1;TNFAIP3;HBEGF
negative regulation of cellular process (GO:0048523)	24/534	0.000840108	0.0252243	0	0	2.1497	15.2241	TSPYL2;IL10;BTG3;CDKN1A;OSM;CXCL1;INHBA;SMAD6;WISP1;EREG;RND1;DLL4;IL1A;DCSTAMP;RGCC;WNT11;IL1B;ALDH1A2;BHLHE40;DACT3;APBB2;SKIL;TNFRSF21;NKX3-1
positive regulation of interleukin-2 production (GO:0032743)	4/20	0.000853537	0.0252243	0	0	11.1802	79.0007	IL1A;PDE4D;IL1B;PDE4B
inactivation of MAPK activity (GO:0000188)	4/20	0.000853537	0.0252243	0	0	11.1802	79.0007	DUSP4;SPRED2;DUSP10;DUSP8
regulation of cardiac muscle contraction (GO:0055117)	5/35	0.000958517	0.0279128	0	0	7.46521	51.8842	PDE4D;ZC3H12A;PDE4B;STC1;SMAD7
positive regulation of cellular metabolic process (GO:0031325)	8/92	0.000969366	0.0279128	0	0	4.28351	29.7227	CDKN1A;GADD45A;ZC3H12A;INHBA;THBS1;HIF1A;HOXA5;VEGFA
negative regulation of cellular response to transforming growth factor beta stimulus (GO:1903845)	6/53	0.0010616	0.0301817	0	0	5.72619	39.2128	SMURF1;BAMBI;PMEPA1;SMAD6;SKIL;SMAD7
negative regulation of oxidative stress-induced neuron death (GO:1903204)	3/10	0.00113844	0.0308066	0	0	19.1311	129.672	IL10;NR4A3;HIF1A
regulation of actin filament-based movement (GO:1903115)	3/10	0.00113844	0.0308066	0	0	19.1311	129.672	PDE4D;PDE4B;STC1
negative regulation of pathway-restricted SMAD protein phosphorylation (GO:0060394)	3/10	0.00113844	0.0308066	0	0	19.1311	129.672	PMEPA1;SMAD6;SMAD7
pulmonary valve development (GO:0003177)	3/10	0.00113844	0.0308066	0	0	19.1311	129.672	JAG1;HEY1;SMAD6
positive regulation of epithelial cell migration (GO:0010634)	7/74	0.00121911	0.0325967	0	0	4.69234	31.4839	EPB41L4B;FOXC2;ZC3H12A;WNT5A;THBS1;HIF1A;VEGFA
positive regulation of smooth muscle cell proliferation (GO:0048661)	5/37	0.00124142	0.0327222	0	0	6.99792	46.8266	IL10;NR4A3;FGF9;THBS1;EREG
positive regulation of cytokine production (GO:0001819)	13/220	0.00125294	0.0327222	0	0	2.83959	18.9749	IL10;RIPK2;PDE4D;SERPINE1;WNT5A;HIF1A;IL2;EREG;IL1A;RGCC;DDIT3;IL1B;PDE4B
negative regulation of transforming growth factor beta receptor signaling pathway (GO:0030512)	6/55	0.00129192	0.0329732	0	0	5.49191	36.5301	SMURF1;BAMBI;PMEPA1;SMAD6;SKIL;SMAD7
Notch signaling pathway (GO:0007219)	6/55	0.00129192	0.0329732	0	0	5.49191	36.5301	DLL4;JAG1;HEY1;SNAI1;NRARP;HES1
response to tumor necrosis factor (GO:0034612)	8/97	0.00136842	0.0341498	0	0	4.04183	26.6522	DCSTAMP;CCL24;CCL7;CCL20;ZC3H12A;TNFRSF21;CXCL16;NKX3-1
negative regulation of cell motility (GO:2000146)	8/97	0.00136842	0.0341498	0	0	4.04183	26.6522	JAG1;DUSP10;WNT11;SERPINE1;DPYSL3;STC1;EPPIN;SMAD7
positive regulation of JNK cascade (GO:0046330)	7/76	0.00142642	0.0352059	0	0	4.55587	29.8527	IL1A;TRAF4;GADD45B;GADD45A;IL1B;FZD7;GADD45G
regulation of axon extension involved in axon guidance (GO:0048841)	4/23	0.00148055	0.0361448	0	0	9.41347	61.3319	SEMA7A;SEMA3B;SEMA3F;VEGFA
regulation of protein kinase C signaling (GO:0090036)	3/11	0.00153984	0.0367924	0	0	16.7389	108.402	WNT11;WNT5A;VEGFA
negative regulation of heart contraction (GO:0045822)	3/11	0.00153984	0.0367924	0	0	16.7389	108.402	SPTBN4;PDE4D;ZC3H12A
positive regulation of ERK1 and ERK2 cascade (GO:0070374)	12/201	0.00174614	0.0409738	0	0	2.86676	18.2049	IL1A;CCL24;NTRK2;SEMA7A;ARHGAP8;CCL7;CCL20;ACKR3;ROR1;FGFR4;MET;DDR2
positive regulation of epithelial to mesenchymal transition (GO:0010718)	5/40	0.00177536	0.0409738	0	0	6.39712	40.5177	COL1A1;RGCC;BAMBI;IL1B;SNAI1
positive regulation of cytokine biosynthetic process (GO:0042108)	5/40	0.00177536	0.0409738	0	0	6.39712	40.5177	IL1A;IL1B;WNT5A;THBS1;EREG
regulation of transforming growth factor beta receptor signaling pathway (GO:0017015)	7/79	0.00178781	0.0409738	0	0	4.36537	27.6186	SMURF1;BAMBI;PMEPA1;SMAD6;THBS1;SKIL;SMAD7
negative regulation of multicellular organismal process (GO:0051241)	9/125	0.00182462	0.041395	0	0	3.49192	22.0214	FOXA1;DUSP10;WNT11;DDIT3;IL1B;STC1;SMAD6;SMAD7;NKX3-1
apoptotic process (GO:0006915)	13/231	0.00193629	0.0428797	0	0	2.69477	16.8342	PLK3;GADD45A;CXCR4;HK2;IL1A;PIK3CA;IL1B;CHEK1;PPIF;TNFSF9;PMAIP1;TNFRSF21;IER3
pulmonary valve morphogenesis (GO:0003184)	3/12	0.00201969	0.0428797	0	0	14.8782	92.3166	JAG1;HEY1;SMAD6
regulation of oligodendrocyte differentiation (GO:0048713)	3/12	0.00201969	0.0428797	0	0	14.8782	92.3166	CXCR4;HES1;TNFRSF21
cellular response to arsenic-containing substance (GO:0071243)	3/12	0.00201969	0.0428797	0	0	14.8782	92.3166	ZC3H12A;PPIF;ATF3
positive regulation of vascular endothelial growth factor receptor signaling pathway (GO:0030949)	3/12	0.00201969	0.0428797	0	0	14.8782	92.3166	IL1B;HIF1A;VEGFA
positive regulation of protein kinase B signaling (GO:0051897)	9/127	0.00203524	0.0428797	0	0	3.43238	21.2709	RASD2;FGF9;PIK3CA;FGF18;FGFR4;MET;THBS1;EREG;HBEGF
positive regulation of nuclear division (GO:0051785)	4/25	0.0020428	0.0428797	0	0	8.51607	52.7437	IL1A;RGCC;IL1B;EREG
regulation of DNA damage response, signal transduction by p53 class mediator (GO:0043516)	4/25	0.0020428	0.0428797	0	0	8.51607	52.7437	SPRED2;SNAI1;PMAIP1;HIC1
positive regulation of protein catabolic process (GO:0045732)	7/81	0.00206566	0.042958	0	0	4.24695	26.2559	PLK3;SMURF1;IL1B;PLK2;WNT5A;TNFAIP3;SNX9
regulation of interleukin-6 production (GO:0032675)	5/42	0.00221405	0.0452322	0	0	6.05071	36.9876	IL10;IL1B;ZC3H12A;WNT5A;TNFAIP3
negative regulation of MAP kinase activity (GO:0043407)	6/61	0.00221529	0.0452322	0	0	4.89129	29.8974	DUSP4;SPRED2;DUSP10;IL1B;SPRY1;DUSP8
response to lipopolysaccharide (GO:0032496)	10/155	0.00235539	0.0475802	0	0	3.10649	18.7975	IL10;SERPINE1;ZC3H12A;WNT5A;PDE4B;TNFAIP3;CXCL1;CXCL3;CXCL2;TNFRSF21
positive regulation of wound healing (GO:0090303)	4/26	0.00237266	0.0475802	0	0	8.12856	49.127	FOXC2;SERPINE1;THBS1;HBEGF
branching morphogenesis of an epithelial tube (GO:0048754)	5/43	0.00246073	0.0489097	0	0	5.89118	35.39	DLL4;NRARP;MET;NKX3-1;VEGFA
positive regulation of endothelial cell chemotaxis (GO:2001028)	3/13	0.0025829	0.0504451	0	0	13.3897	79.7873	FGF18;MET;VEGFA
regulation of fibrinolysis (GO:0051917)	3/13	0.0025829	0.0504451	0	0	13.3897	79.7873	THBD;SERPINE1;THBS1
nervous system development (GO:0007399)	20/455	0.00285877	0.0553518	0	0	2.08851	12.2332	ACHE;SERF1A;JAG1;APLP1;CAMK2A;CXCL1;INHBA;VEGFA;ABTB2;RNF103;EDNRB;B3GNT5;ALDH1A2;SPOCK2;NINJ1;PMP22;CDHR4;HES1;FGFR4;NBL1
positive regulation of blood vessel endothelial cell migration (GO:0043536)	5/45	0.00301302	0.0578397	0	0	5.59604	32.484	FOXC2;FGF18;THBS1;HIF1A;VEGFA
positive regulation of fibroblast proliferation (GO:0048146)	4/28	0.00313872	0.0590518	0	0	7.45042	42.9438	CDKN1A;WNT5A;EREG;DDR2
negative regulation of hydrogen peroxide-induced cell death (GO:1903206)	3/14	0.00323392	0.0590518	0	0	12.1719	69.7942	IL10;NR4A3;MET
regulation of fibroblast migration (GO:0010762)	3/14	0.00323392	0.0590518	0	0	12.1719	69.7942	HAS1;THBS1;DDR2
branching involved in blood vessel morphogenesis (GO:0001569)	3/14	0.00323392	0.0590518	0	0	12.1719	69.7942	DLL4;NRARP;VEGFA
mitotic cell cycle arrest (GO:0071850)	3/14	0.00323392	0.0590518	0	0	12.1719	69.7942	RGCC;GADD45A;NKX3-1
positive regulation of DNA damage response, signal transduction by p53 class mediator (GO:0043517)	3/14	0.00323392	0.0590518	0	0	12.1719	69.7942	SPRED2;PMAIP1;HIC1
regulation of protein kinase B signaling (GO:0051896)	10/163	0.00338838	0.0613733	0	0	2.94284	16.7371	RASD2;FGF9;PIK3CA;DDIT3;FGF18;FGFR4;MET;THBS1;EREG;HBEGF
collagen fibril organization (GO:0030199)	4/29	0.00357838	0.0637861	0	0	7.15204	40.2863	COL1A1;COL2A1;COL12A1;DDR2
semaphorin-plexin signaling pathway (GO:0071526)	4/29	0.00357838	0.0637861	0	0	7.15204	40.2863	SEMA7A;SEMA3B;SEMA3F;MET
cellular response to heat (GO:0034605)	5/47	0.00364956	0.0645426	0	0	5.32902	29.9126	IL1A;HSF2;HSPA2;THBS1;HSPA13
positive regulation of gene expression (GO:0010628)	29/771	0.00380095	0.0665283	0	0	1.78504	9.94713	FOXC2;CASZ1;HIF1A;THBS1;SEC14L2;DLL4;EPB41L4B;WNT11;TP53INP2;ZC3H12A;NRIP1;NKX3-1;IL10;NTRK2;FZD7;WNT5A;INHBA;POU3F1;VEGFA;COL1A1;MLXIPL;IL1A;RGCC;SMO;BAMBI;DDIT3;IL1B;SNAI1;FGFR4
response to lipid (GO:0033993)	9/140	0.00392078	0.0665283	0	0	3.08969	17.1214	FOXA1;GH1;ALPL;CXCL1;FFAR1;CXCL3;CXCL2;TNFRSF21;NKX3-1
negative regulation of peptidyl-threonine phosphorylation (GO:0010801)	3/15	0.00397679	0.0665283	0	0	11.157	61.6677	SPRED2;DDIT4;SMAD7
positive regulation of glycolytic process (GO:0045821)	3/15	0.00397679	0.0665283	0	0	11.157	61.6677	MLXIPL;PFKFB3;HIF1A
positive regulation of coenzyme metabolic process (GO:0051197)	3/15	0.00397679	0.0665283	0	0	11.157	61.6677	MLXIPL;PFKFB3;HIF1A
negative regulation of axon extension involved in axon guidance (GO:0048843)	3/15	0.00397679	0.0665283	0	0	11.157	61.6677	SEMA7A;SEMA3B;SEMA3F
cellular response to lipopolysaccharide (GO:0071222)	7/91	0.00398794	0.0665283	0	0	3.73944	20.6585	IL10;IL1B;SERPINE1;ZC3H12A;WNT5A;PDE4B;TNFAIP3
regulation of cell migration involved in sprouting angiogenesis (GO:0090049)	4/30	0.00405805	0.0665283	0	0	6.87661	37.8698	DLL4;FOXC2;THBS1;VEGFA
cellular response to drug (GO:0035690)	4/30	0.00405805	0.0665283	0	0	6.87661	37.8698	IL1B;PDE2A;PDE4B;NKX3-1
artery morphogenesis (GO:0048844)	4/30	0.00405805	0.0665283	0	0	6.87661	37.8698	JAG1;HES1;SMAD7;VEGFA
response to organic cyclic compound (GO:0014070)	6/69	0.00412868	0.0671957	0	0	4.26842	23.4328	FOXA1;GH1;IL1B;PMAIP1;ALPL;NKX3-1
regulation of reactive oxygen species metabolic process (GO:2000377)	5/49	0.00437715	0.070222	0	0	5.08627	27.6254	CDKN1A;GADD45A;STK17A;ZC3H12A;THBS1
positive regulation of response to DNA damage stimulus (GO:2001022)	5/49	0.00437715	0.070222	0	0	5.08627	27.6254	SPRED2;H2AFX;PMAIP1;HIC1;NKX3-1
regulation of apoptotic process (GO:0042981)	30/815	0.00444592	0.0708193	0	0	1.74569	9.45424	PXT1;FOXA1;THBS1;WNT11;PMAIP1;HOXA5;IL10;PLK3;NTRK2;GADD45B;TNFRSF12A;RIPK2;ACTN2;GADD45A;GDF15;PLK2;WNT5A;PLAUR;INHBA;SMAD6;IL2;GADD45G;VEGFA;STK17A;PPIF;ROR1;FGFR4;MET;TNFRSF21;DDR2
regulation of blood vessel endothelial cell migration (GO:0043535)	5/50	0.0047772	0.0735706	0	0	4.97299	26.5752	RGCC;FGF18;THBS1;HIF1A;VEGFA
cardiac ventricle development (GO:0003231)	3/16	0.00481517	0.0735706	0	0	10.2982	54.9511	DLL4;HEY1;HES1
regulation of energy homeostasis (GO:2000505)	3/16	0.00481517	0.0735706	0	0	10.2982	54.9511	MLXIPL;NR4A3;METRNL
artery development (GO:0060840)	3/16	0.00481517	0.0735706	0	0	10.2982	54.9511	HES1;SMAD7;VEGFA
aorta morphogenesis (GO:0035909)	3/16	0.00481517	0.0735706	0	0	10.2982	54.9511	DLL4;JAG1;HEY1
positive regulation of leukocyte activation (GO:0002696)	3/16	0.00481517	0.0735706	0	0	10.2982	54.9511	WNT5A;THBS1;CRLF2
negative regulation of cell migration (GO:0030336)	8/121	0.0054059	0.0820383	0	0	3.17946	16.5976	JAG1;DUSP10;WNT11;HAS1;SERPINE1;DPYSL3;STC1;SMAD7
regulation of MAPK cascade (GO:0043408)	11/203	0.00555736	0.0837707	0	0	2.58039	13.399	NTRK2;GDF15;IL1B;LIF;OSM;ROR1;INHBA;FGFR4;ADRA2B;MET;DDR2
regulation of DNA binding (GO:0051101)	5/52	0.00565397	0.0844548	0	0	4.76088	24.6395	SMO;ID1;PLAUR;ID3;HES1
negative regulation of axon guidance (GO:1902668)	3/17	0.00575232	0.0844548	0	0	9.56213	49.3229	SEMA7A;SEMA3B;SEMA3F
positive regulation of signal transduction by p53 class mediator (GO:1901798)	3/17	0.00575232	0.0844548	0	0	9.56213	49.3229	SPRED2;PMAIP1;HIC1
positive regulation of cell-cell adhesion (GO:0022409)	4/33	0.00575315	0.0844548	0	0	6.16429	31.7954	FOXA1;IL10;IL1B;SMAD7
neutrophil chemotaxis (GO:0030593)	5/53	0.00613234	0.0883064	0	0	4.66146	23.7463	CCL24;CCL7;CCL20;PDE4B;CXCL3
positive regulation of tyrosine phosphorylation of STAT protein (GO:0042531)	5/53	0.00613234	0.0883064	0	0	4.66146	23.7463	GH1;LIF;OSM;HES1;IL2
C-terminal protein lipidation (GO:0006501)	6/75	0.00621302	0.0883064	0	0	3.89605	19.7963	LY6K;ALPL;LYPD3;LY6G6C;MSLN;ULBP2
cellular response to lipid (GO:0071396)	10/178	0.00627157	0.0883064	0	0	2.67802	13.5822	IL10;WNT11;FZD7;SERPINE1;ZC3H12A;WNT5A;NRIP1;PDE4B;TNFAIP3;NKX3-1
negative regulation of protein phosphorylation (GO:0001933)	10/178	0.00627157	0.0883064	0	0	2.67802	13.5822	MLXIPL;SPRED2;PDE4D;ZC3H12A;DDIT4;PMEPA1;DMD;SMAD6;SAMSN1;SMAD7
epithelial tube morphogenesis (GO:0060562)	4/34	0.0064087	0.0883064	0	0	5.9585	30.091	HES1;MET;NKX3-1;VEGFA
regulation of interleukin-8 production (GO:0032677)	4/34	0.0064087	0.0883064	0	0	5.9585	30.091	IL10;IL1B;DDIT3;SERPINE1
positive regulation of leukocyte migration (GO:0002687)	4/34	0.0064087	0.0883064	0	0	5.9585	30.091	CXCL1;CXCL3;CXCL2;VEGFA
negative regulation of DNA binding (GO:0043392)	4/34	0.0064087	0.0883064	0	0	5.9585	30.091	HEY1;SMO;ID1;ID3
negative regulation of endothelial cell migration (GO:0010596)	4/34	0.0064087	0.0883064	0	0	5.9585	30.091	DLL4;RGCC;STC1;THBS1
positive regulation of apoptotic signaling pathway (GO:2001235)	6/76	0.00662331	0.0885643	0	0	3.8402	19.2669	TNFRSF12A;PLAUR;PPIF;PMAIP1;G0S2;NKX3-1
cellular response to transforming growth factor beta stimulus (GO:0071560)	7/100	0.00666895	0.0885643	0	0	3.376	16.9147	SMURF1;GDF15;WNT5A;PDE2A;ID1;FERMT2;SMAD7
regulation of mitochondrial membrane permeability (GO:0046902)	3/18	0.00679114	0.0885643	0	0	8.9242	44.5508	CAMK2A;PPIF;PMAIP1
positive regulation of carbohydrate metabolic process (GO:0045913)	3/18	0.00679114	0.0885643	0	0	8.9242	44.5508	MLXIPL;PFKFB3;HIF1A
positive regulation of morphogenesis of an epithelium (GO:1905332)	3/18	0.00679114	0.0885643	0	0	8.9242	44.5508	SMO;LIF;VEGFA
regulation of adiponectin secretion (GO:0070163)	2/6	0.00686117	0.0885643	0	0	22.2722	110.957	HCAR2;IL1B
negative regulation of glucocorticoid receptor signaling pathway (GO:2000323)	2/6	0.00686117	0.0885643	0	0	22.2722	110.957	PER1;CRY1
positive regulation of fibroblast migration (GO:0010763)	2/6	0.00686117	0.0885643	0	0	22.2722	110.957	THBS1;DDR2
vascular smooth muscle cell development (GO:0097084)	2/6	0.00686117	0.0885643	0	0	22.2722	110.957	HES1;VEGFA
regulation of relaxation of cardiac muscle (GO:1901897)	2/6	0.00686117	0.0885643	0	0	22.2722	110.957	PDE4D;PDE4B
regulation of interleukin-5 secretion (GO:2000662)	2/6	0.00686117	0.0885643	0	0	22.2722	110.957	TNFRSF21;CRLF2
regulation of endothelial cell apoptotic process (GO:2000351)	4/35	0.00711195	0.0897385	0	0	5.766	28.5185	RGCC;SERPINE1;TNFAIP3;THBS1
negative regulation of epithelial cell migration (GO:0010633)	4/35	0.00711195	0.0897385	0	0	5.766	28.5185	DLL4;DUSP10;STC1;THBS1
neural crest cell development (GO:0014032)	4/35	0.00711195	0.0897385	0	0	5.766	28.5185	SEMA7A;SEMA3B;SEMA3F;KBTBD8
protein kinase B signaling (GO:0043491)	4/35	0.00711195	0.0897385	0	0	5.766	28.5185	PLK3;CDKN1A;IL1B;NKX3-1
granulocyte chemotaxis (GO:0071621)	5/56	0.00773709	0.0942869	0	0	4.38658	21.3264	CCL24;CCL7;CCL20;PDE4B;CXCL3
chordate embryonic development (GO:0043009)	5/56	0.00773709	0.0942869	0	0	4.38658	21.3264	COL1A1;WNT11;ALDH1A2;WNT5A;VEGFA
regulation of BMP signaling pathway (GO:0030510)	5/56	0.00773709	0.0942869	0	0	4.38658	21.3264	SMURF1;SMAD6;NBL1;SKIL;SMAD7
endoderm formation (GO:0001706)	4/36	0.0078643	0.0942869	0	0	5.58553	27.0642	DUSP4;LAMB3;COL12A1;INHBA
zymogen activation (GO:0031638)	4/36	0.0078643	0.0942869	0	0	5.58553	27.0642	C1R;PLAU;RIPK2;PLAT
cardiac muscle contraction (GO:0060048)	4/36	0.0078643	0.0942869	0	0	5.58553	27.0642	PIK3CA;TCAP;DMD;SCN4B
positive regulation of STAT cascade (GO:1904894)	3/19	0.0079342	0.0942869	0	0	8.36601	40.4628	GH1;HES1;CRLF2
positive regulation of activated T cell proliferation (GO:0042104)	3/19	0.0079342	0.0942869	0	0	8.36601	40.4628	TNFSF9;IL2;ICOSLG
purine ribonucleotide catabolic process (GO:0009154)	3/19	0.0079342	0.0942869	0	0	8.36601	40.4628	PDE4D;PDE2A;PDE4B
positive regulation of blood coagulation (GO:0030194)	3/19	0.0079342	0.0942869	0	0	8.36601	40.4628	THBD;SERPINE1;THBS1
regulation of catenin import into nucleus (GO:0035412)	3/19	0.0079342	0.0942869	0	0	8.36601	40.4628	BAMBI;FZD7;DACT3
generation of neurons (GO:0048699)	8/130	0.00823549	0.0973521	0	0	2.94355	14.127	NTRK2;WNT11;TUBB3;FZD7;WNT5A;DDIT4;ID1;ID3
positive regulation of cell death (GO:0010942)	5/57	0.00833119	0.0979678	0	0	4.302	20.5969	RIPK2;ZC3H12A;WNT5A;DDIT4;NKX3-1
axon guidance (GO:0007411)	9/158	0.00851742	0.0985503	0	0	2.71393	12.9336	SPTBN4;PIK3CA;TUBB3;WNT5A;SEMA3B;CXCR4;GAB2;SEMA3F;VEGFA
epithelial to mesenchymal transition (GO:0001837)	4/37	0.00866707	0.0985503	0	0	5.41599	25.7163	HEY1;WNT5A;SNAI1;HIF1A
regulation of peptidyl-threonine phosphorylation (GO:0010799)	4/37	0.00866707	0.0985503	0	0	5.41599	25.7163	SPRED2;RIPK2;DDIT4;SMAD7
autophagosome assembly (GO:0000045)	5/58	0.00895614	0.0985503	0	0	4.22062	19.902	GABARAPL1;SMURF1;TP53INP2;MAP1LC3B2;ATG2A
neutrophil migration (GO:1990266)	5/58	0.00895614	0.0985503	0	0	4.22062	19.902	CCL24;CCL7;CCL20;PDE4B;CXCL3
regulation of GTPase activity (GO:0043087)	10/188	0.00906637	0.0985503	0	0	2.52627	11.8815	CCL24;NTRK2;ARHGAP8;WNT11;PRR5-ARHGAP8;CCL7;RGS1;CCL20;RGS16;SNX9
positive regulation of cellular catabolic process (GO:0031331)	7/106	0.00908162	0.0985503	0	0	3.17041	14.9057	MLXIPL;PFKFB3;PLK2;IL1B;ZC3H12A;SNX9;HIF1A
negative regulation of ion transport (GO:0043271)	3/20	0.00918374	0.0985503	0	0	7.87349	36.9292	ACTN2;PPIF;STC1
entrainment of circadian clock by photoperiod (GO:0043153)	3/20	0.00918374	0.0985503	0	0	7.87349	36.9292	PER1;BHLHE40;CRY1
angiotensin-activated signaling pathway (GO:0038166)	2/7	0.0094661	0.0985503	0	0	17.8169	83.0272	ACTN2;CAMK2A
regulation of cyclic nucleotide metabolic process (GO:0030799)	2/7	0.0094661	0.0985503	0	0	17.8169	83.0272	THBS1;VEGFA
bleb assembly (GO:0032060)	2/7	0.0094661	0.0985503	0	0	17.8169	83.0272	PMP22;EMP1
AV node cell action potential (GO:0086016)	2/7	0.0094661	0.0985503	0	0	17.8169	83.0272	SCN4B;CACNA1G
regulation of extracellular matrix organization (GO:1903053)	2/7	0.0094661	0.0985503	0	0	17.8169	83.0272	FGFR4;DDR2
dorsal aorta development (GO:0035907)	2/7	0.0094661	0.0985503	0	0	17.8169	83.0272	DLL4;HEY1
positive regulation of blood vessel endothelial cell proliferation involved in sprouting angiogenesis (GO:1903589)	2/7	0.0094661	0.0985503	0	0	17.8169	83.0272	PPP1R16B;VEGFA
regulation of glucocorticoid receptor signaling pathway (GO:2000322)	2/7	0.0094661	0.0985503	0	0	17.8169	83.0272	PER1;CRY1
regulation of norepinephrine secretion (GO:0014061)	2/7	0.0094661	0.0985503	0	0	17.8169	83.0272	ADRA2B;STX1A
dorsal aorta morphogenesis (GO:0035912)	2/7	0.0094661	0.0985503	0	0	17.8169	83.0272	DLL4;HEY1
hyaluronan biosynthetic process (GO:0030213)	2/7	0.0094661	0.0985503	0	0	17.8169	83.0272	IL1B;HAS1
positive regulation of interleukin-5 production (GO:0032754)	2/7	0.0094661	0.0985503	0	0	17.8169	83.0272	PDE4D;CRLF2
cellular response to platelet-derived growth factor stimulus (GO:0036120)	2/7	0.0094661	0.0985503	0	0	17.8169	83.0272	HAS1;MTSS1L
negative regulation of programmed cell death (GO:0043069)	17/408	0.00950709	0.0985503	0	0	1.96555	9.15102	IL10;PLK3;NTRK2;RIPK2;PLK2;WNT5A;PLAUR;SMAD6;THBS1;IL2;VEGFA;WNT11;PPIF;ROR1;FGFR4;MET;DDR2
C-terminal protein amino acid modification (GO:0018410)	6/82	0.00950768	0.0985503	0	0	3.53593	16.4621	LY6K;ALPL;LYPD3;LY6G6C;MSLN;ULBP2
muscle filament sliding (GO:0030049)	4/38	0.00952156	0.0985503	0	0	5.25643	24.4644	MYBPC2;ACTN2;TCAP;DMD
actin-myosin filament sliding (GO:0033275)	4/38	0.00952156	0.0985503	0	0	5.25643	24.4644	MYBPC2;ACTN2;TCAP;DMD
negative regulation of intracellular signal transduction (GO:1902532)	9/161	0.00957128	0.0985853	0	0	2.65995	12.3661	PER1;DDIT3;ZC3H12A;DDIT4;PDE2A;PPIF;PLAUR;TNFAIP3;THBS1
regulation of pathway-restricted SMAD protein phosphorylation (GO:0060393)	5/59	0.00961272	0.0985853	0	0	4.14224	19.2393	GDF15;PMEPA1;INHBA;SMAD6;SMAD7
regulation of extrinsic apoptotic signaling pathway via death domain receptors (GO:1902041)	4/39	0.010429	0.102582	0	0	5.10598	23.2995	SERPINE1;TNFAIP3;PMAIP1;THBS1
positive regulation of reactive oxygen species metabolic process (GO:2000379)	4/39	0.010429	0.102582	0	0	5.10598	23.2995	CDKN1A;GADD45A;ZC3H12A;THBS1
mRNA transcription (GO:0009299)	3/21	0.0105417	0.102582	0	0	7.43569	33.8504	DDIT3;HIF1A;EREG
regulation of macrophage activation (GO:0043030)	3/21	0.0105417	0.102582	0	0	7.43569	33.8504	WNT5A;ZC3H12A;THBS1
establishment of endothelial barrier (GO:0061028)	3/21	0.0105417	0.102582	0	0	7.43569	33.8504	PPP1R16B;PDE4D;PDE2A
regulation of interleukin-2 production (GO:0032663)	3/21	0.0105417	0.102582	0	0	7.43569	33.8504	PDE4D;PDE4B;TNFAIP3
ventricular septum morphogenesis (GO:0060412)	3/21	0.0105417	0.102582	0	0	7.43569	33.8504	HEY1;HES1;SMAD7
long-term synaptic potentiation (GO:0060291)	3/21	0.0105417	0.102582	0	0	7.43569	33.8504	MPP2;PLK2;SLC8A2
positive regulation of lipid metabolic process (GO:0045834)	3/21	0.0105417	0.102582	0	0	7.43569	33.8504	MLXIPL;IL1B;EEF1A2
embryonic skeletal system development (GO:0048706)	3/21	0.0105417	0.102582	0	0	7.43569	33.8504	COL1A1;WNT11;WNT5A
photoperiodism (GO:0009648)	3/21	0.0105417	0.102582	0	0	7.43569	33.8504	PER1;BHLHE40;CRY1
regulation of mitotic nuclear division (GO:0007088)	6/84	0.0106419	0.102582	0	0	3.44492	15.6501	IL1A;RGCC;IL1B;CHEK1;PMEPA1;EREG
regulation of neuron differentiation (GO:0045664)	6/84	0.0106419	0.102582	0	0	3.44492	15.6501	CASZ1;NCS1;ID1;ID3;ADRA2B;NBL1
cellular response to molecule of bacterial origin (GO:0071219)	6/84	0.0106419	0.102582	0	0	3.44492	15.6501	IL10;SERPINE1;ZC3H12A;WNT5A;PDE4B;TNFAIP3
regulation of tyrosine phosphorylation of STAT protein (GO:0042509)	5/61	0.0110236	0.105358	0	0	3.9939	18.0033	GH1;LIF;OSM;HES1;IL2
striated muscle contraction (GO:0006941)	5/61	0.0110236	0.105358	0	0	3.9939	18.0033	MYBPC2;PIK3CA;TCAP;DMD;SCN4B
regulation of peptidyl-tyrosine phosphorylation (GO:0050730)	6/85	0.0112435	0.107004	0	0	3.40113	15.2642	GH1;RIPK2;LIF;OSM;SAMSN1;VEGFA
positive regulation of mitotic nuclear division (GO:0045840)	4/40	0.0113905	0.107492	0	0	4.9639	22.2133	IL1A;RGCC;IL1B;EREG
negative regulation of cytokine secretion (GO:0050710)	4/40	0.0113905	0.107492	0	0	4.9639	22.2133	IL10;RGCC;ZC3H12A;TNFRSF21
regulation of inflammatory response (GO:0050727)	9/166	0.0115427	0.108316	0	0	2.57458	11.487	IL10;PER1;SEMA7A;SERPINE1;WNT5A;PDE2A;TNFAIP3;METRNL;IL2
response to cytokine (GO:0034097)	8/138	0.0115743	0.108316	0	0	2.76127	12.3124	IL1RL2;IL1R1;IRAK2;ALDH1A2;DPYSL3;CXCR4;CXCL16;RELB
negative regulation of apoptotic process (GO:0043066)	19/485	0.0117316	0.108875	0	0	1.84472	8.20062	IL10;PLK3;NTRK2;RIPK2;PLK2;WNT5A;PLAUR;SMAD6;THBS1;IL2;VEGFA;WNT11;PIK3CA;ZC3H12A;PPIF;ROR1;FGFR4;MET;DDR2
positive regulation of catabolic process (GO:0009896)	5/62	0.0117794	0.108875	0	0	3.92363	17.4264	SMURF1;IL1B;PLK2;WNT5A;TNFAIP3
DNA damage response, signal transduction by p53 class mediator resulting in cell cycle arrest (GO:0006977)	5/62	0.0117794	0.108875	0	0	3.92363	17.4264	PLK3;CDKN1A;RGCC;GADD45A;PLK2
regulation of vascular endothelial growth factor receptor signaling pathway (GO:0030947)	3/22	0.0120096	0.110042	0	0	7.04398	31.1488	IL1B;HIF1A;VEGFA
regulation of membrane protein ectodomain proteolysis (GO:0051043)	3/22	0.0120096	0.110042	0	0	7.04398	31.1488	IL10;IL1B;SNX9
cellular response to growth factor stimulus (GO:0071363)	8/139	0.0120527	0.110042	0	0	2.74005	12.1068	DLL4;NTRK2;HAS1;WNT5A;PDE2A;MTSS1L;SMAD7;VEGFA
biomineral tissue development (GO:0031214)	2/8	0.0124385	0.111747	0	0	14.8466	65.1316	COL1A1;DDR2
regulation of chaperone-mediated autophagy (GO:1904714)	2/8	0.0124385	0.111747	0	0	14.8466	65.1316	PLK3;EEF1A2
DNA damage induced protein phosphorylation (GO:0006975)	2/8	0.0124385	0.111747	0	0	14.8466	65.1316	CHEK1;CRY1
positive regulation of interleukin-2 biosynthetic process (GO:0045086)	2/8	0.0124385	0.111747	0	0	14.8466	65.1316	IL1A;IL1B
negative regulation of sequence-specific DNA binding transcription factor activity (GO:0043433)	8/140	0.0125456	0.112029	0	0	2.71915	11.9055	IRAK2;DDIT3;ZC3H12A;ID1;BHLHE40;ID3;TNFAIP3;SMAD7
signal transduction involved in mitotic G1 DNA damage checkpoint (GO:0072431)	5/63	0.0125696	0.112029	0	0	3.85578	16.8747	PLK3;CDKN1A;RGCC;GADD45A;PLK2
positive regulation of JAK-STAT cascade (GO:0046427)	5/64	0.013395	0.117981	0	0	3.79023	16.3468	GH1;LIF;OSM;HES1;IL2
cellular response to decreased oxygen levels (GO:0036294)	5/64	0.013395	0.117981	0	0	3.79023	16.3468	RGCC;PMAIP1;HIF1A;NKX3-1;VEGFA
negative regulation of neuron differentiation (GO:0045665)	5/64	0.013395	0.117981	0	0	3.79023	16.3468	EDNRB;DPYSL3;ID1;ID3;HES1
cellular response to catecholamine stimulus (GO:0071870)	3/23	0.013589	0.118298	0	0	6.69144	28.7631	NR4A3;APLP1;PDE4B
positive regulation of ATP metabolic process (GO:1903580)	3/23	0.013589	0.118298	0	0	6.69144	28.7631	MLXIPL;PFKFB3;HIF1A
negative regulation of axon extension (GO:0030517)	3/23	0.013589	0.118298	0	0	6.69144	28.7631	SEMA7A;SEMA3B;SEMA3F
negative regulation of cell growth (GO:0030308)	7/115	0.0138198	0.119842	0	0	2.90487	12.4376	TSPYL2;DCSTAMP;CDKN1A;WNT11;DACT3;APBB2;INHBA
peptidyl-threonine modification (GO:0018210)	6/89	0.0138909	0.119996	0	0	3.23656	13.8412	GALNT5;PNCK;CHEK1;CAMK2A;CAMK1G;CAMKK1
positive regulation of protein kinase activity (GO:0045860)	9/172	0.014292	0.122988	0	0	2.47904	10.5311	GH1;CDKN1A;TRAF4;SPDYA;SNX9;CAMKK1;EREG;DDR2;VEGFA
positive regulation of peptidyl-tyrosine phosphorylation (GO:0050731)	7/116	0.0144378	0.123696	0	0	2.87807	12.197	GH1;RIPK2;LIF;OSM;HES1;IL2;VEGFA
cardiac ventricle morphogenesis (GO:0003208)	4/43	0.0146104	0.123696	0	0	4.58135	19.3609	DLL4;JAG1;HEY1;SMAD7
positive regulation of response to external stimulus (GO:0032103)	6/90	0.0146152	0.123696	0	0	3.19787	13.5132	THBD;SERPINE1;WNT5A;PDE2A;THBS1;IL2
transmembrane receptor protein serine/threonine kinase signaling pathway (GO:0007178)	8/144	0.0146656	0.123696	0	0	2.63864	11.141	SMURF1;GDF15;ID1;INHBA;SMAD6;CHRDL1;FERMT2;SMAD7
regulation of signal transduction (GO:0009966)	11/233	0.0147048	0.123696	0	0	2.22823	9.40221	TSPYL2;NTRK2;IRAK2;RGS16;DACT3;ROR1;FGFR4;SAMSN1;MET;DHRS3;DDR2
activation of protein kinase activity (GO:0032147)	11/233	0.0147048	0.123696	0	0	2.22823	9.40221	GADD45B;GADD45A;RIPK2;IRAK2;IL1B;WNT5A;CXCR4;ADRA2B;THBS1;GADD45G;VEGFA
negative regulation of epithelial cell proliferation (GO:0050680)	5/66	0.0151536	0.124944	0	0	3.66559	15.357	DUSP10;RGCC;THBS1;NKX3-1;EREG
positive regulation of neutrophil chemotaxis (GO:0090023)	3/24	0.0152809	0.124944	0	0	6.37247	26.6443	CXCL1;CXCL3;CXCL2
positive regulation of vascular endothelial growth factor production (GO:0010575)	3/24	0.0152809	0.124944	0	0	6.37247	26.6443	IL1A;IL1B;HIF1A
negative regulation of interleukin-6 production (GO:0032715)	3/24	0.0152809	0.124944	0	0	6.37247	26.6443	IL10;ZC3H12A;TNFAIP3
cytoplasmic pattern recognition receptor signaling pathway (GO:0002753)	3/24	0.0152809	0.124944	0	0	6.37247	26.6443	RIPK2;IRAK2;TNFAIP3
cAMP metabolic process (GO:0046058)	3/24	0.0152809	0.124944	0	0	6.37247	26.6443	PDE4D;PDE2A;PDE4B
regulation of macrophage cytokine production (GO:0010935)	2/9	0.0157609	0.124944	0	0	12.725	52.8117	SEMA7A;WNT5A
positive regulation of coagulation (GO:0050820)	2/9	0.0157609	0.124944	0	0	12.725	52.8117	SERPINE1;THBS1
negative regulation of mitotic nuclear division (GO:0045839)	2/9	0.0157609	0.124944	0	0	12.725	52.8117	RGCC;CHEK1
response to muscle stretch (GO:0035994)	2/9	0.0157609	0.124944	0	0	12.725	52.8117	TCAP;DMD
regulation of cytokine secretion involved in immune response (GO:0002739)	2/9	0.0157609	0.124944	0	0	12.725	52.8117	IL10;WNT5A
positive regulation of hemostasis (GO:1900048)	2/9	0.0157609	0.124944	0	0	12.725	52.8117	SERPINE1;THBS1
regulation of cell-cell adhesion mediated by cadherin (GO:2000047)	2/9	0.0157609	0.124944	0	0	12.725	52.8117	FOXA1;RGCC
regulation of oxidative phosphorylation (GO:0002082)	2/9	0.0157609	0.124944	0	0	12.725	52.8117	MLXIPL;PPIF
lymphocyte chemotaxis (GO:0048247)	4/44	0.0157987	0.124944	0	0	4.46659	18.5266	CCL24;CCL7;CCL20;CXCL16
regulation of smooth muscle cell proliferation (GO:0048660)	4/44	0.0157987	0.124944	0	0	4.46659	18.5266	NR4A3;TNFAIP3;THBS1;EREG
heart contraction (GO:0060047)	4/44	0.0157987	0.124944	0	0	4.46659	18.5266	PIK3CA;TCAP;DMD;SCN4B
cell cycle G1/S phase transition (GO:0044843)	6/92	0.0161418	0.127208	0	0	3.12318	12.8873	PLK3;CDKN1A;PLK2;CAMK2A;SPDYA;INHBA
positive regulation of nucleic acid-templated transcription (GO:1903508)	19/502	0.0163051	0.128047	0	0	1.7782	7.31957	IL10;FOXC2;CASZ1;FZD7;WNT5A;INHBA;POU3F1;HIF1A;COL1A1;SEC14L2;MLXIPL;WNT11;BAMBI;DDIT3;TP53INP2;IL1B;NRIP1;SNAI1;NKX3-1
regulation of protein kinase activity (GO:0045859)	8/147	0.0164183	0.128486	0	0	2.58129	10.6074	TSPYL2;CDKN1A;TRAF4;SPDYA;SNX9;CAMKK1;EREG;DDR2
protein complex subunit organization (GO:0071822)	4/45	0.0170461	0.130697	0	0	4.35743	17.7427	COL1A1;COL2A1;COL12A1;DDR2
response to interferon-gamma (GO:0034341)	5/68	0.0170603	0.130697	0	0	3.54886	14.4474	CCL24;CCL7;CCL20;WNT5A;CXCL16
peptidyl-threonine phosphorylation (GO:0018107)	5/68	0.0170603	0.130697	0	0	3.54886	14.4474	PNCK;CHEK1;CAMK2A;CAMK1G;CAMKK1
negative regulation of wound healing (GO:0061045)	3/25	0.0170861	0.130697	0	0	6.0825	24.7527	THBD;DUSP10;SERPINE1
nucleotide-binding domain, leucine rich repeat containing receptor signaling pathway (GO:0035872)	3/25	0.0170861	0.130697	0	0	6.0825	24.7527	IRAK2;RIPK2;TNFAIP3
positive regulation of neutrophil migration (GO:1902624)	3/25	0.0170861	0.130697	0	0	6.0825	24.7527	CXCL1;CXCL3;CXCL2
negative regulation of growth (GO:0045926)	7/120	0.0171081	0.130697	0	0	2.77562	11.2918	TSPYL2;DCSTAMP;CDKN1A;WNT11;DACT3;APBB2;INHBA
skin development (GO:0043588)	6/94	0.0177751	0.134948	0	0	3.05188	12.299	COL1A1;JAG1;WNT5A;CLDN1;MET;EREG
regulation of transcription, DNA-templated (GO:0006355)	48/1598	0.0177848	0.134948	0	0	1.41908	5.71805	FOXA1;FOXC2;GCM1;ZNF395;CDKN1A;CASZ1;GMEB2;ZBTB21;CREM;HIF1A;CHD1;SEC14L2;WNT11;HEY1;TP53INP2;ZNF704;NRIP1;APBB2;HES1;OR7D2;NKX3-1;IL10;FZD7;WNT5A;ARID5A;INHBA;POU3F1;MED26;HIC1;FOSL2;EREG;VEGFA;COL1A1;FOSL1;MLXIPL;PER1;TOX2;BAMBI;DDIT3;IL1B;ID1;BHLHE40;SNAI1;ERF;CRY1;ID3;SP8;ATF3
positive regulation of ion transport (GO:0043270)	4/46	0.0183534	0.137865	0	0	4.25346	17.0051	ACTN2;CAMK2A;FFAR1;SCN4B
regulation of fibroblast proliferation (GO:0048145)	4/46	0.0183534	0.137865	0	0	4.25346	17.0051	CDKN1A;WNT5A;EREG;DDR2
aminoglycan biosynthetic process (GO:0006023)	4/46	0.0183534	0.137865	0	0	4.25346	17.0051	GALNT5;SDC2;HAS1;B3GNT5
positive regulation of granulocyte chemotaxis (GO:0071624)	3/26	0.0190052	0.138728	0	0	5.81775	23.056	CXCL1;CXCL3;CXCL2
negative chemotaxis (GO:0050919)	3/26	0.0190052	0.138728	0	0	5.81775	23.056	SEMA7A;SEMA3B;SEMA3F
regulation of cardiac muscle cell contraction (GO:0086004)	3/26	0.0190052	0.138728	0	0	5.81775	23.056	PDE4D;PDE4B;STC1
positive regulation of release of cytochrome c from mitochondria (GO:0090200)	3/26	0.0190052	0.138728	0	0	5.81775	23.056	PLAUR;PPIF;PMAIP1
cellular response to oxygen-containing compound (GO:1901701)	12/274	0.0190179	0.138728	0	0	2.06021	8.16334	IL10;MLXIPL;NR4A3;WNT11;FZD7;SERPINE1;ZC3H12A;PDE2A;WNT5A;NRIP1;PDE4B;TNFAIP3
positive regulation of epidermal growth factor-activated receptor activity (GO:0045741)	2/10	0.0194165	0.138728	0	0	11.1338	43.8855	ADRA2B;EREG
regulation of B cell apoptotic process (GO:0002902)	2/10	0.0194165	0.138728	0	0	11.1338	43.8855	IL10;IL2
response to laminar fluid shear stress (GO:0034616)	2/10	0.0194165	0.138728	0	0	11.1338	43.8855	SMAD6;SMAD7
positive regulation of glial cell differentiation (GO:0045687)	2/10	0.0194165	0.138728	0	0	11.1338	43.8855	CXCR4;HES1
epithelial cell morphogenesis (GO:0003382)	2/10	0.0194165	0.138728	0	0	11.1338	43.8855	STC1;MET
creatine metabolic process (GO:0006600)	2/10	0.0194165	0.138728	0	0	11.1338	43.8855	CKMT1A;CKB
negative regulation of B cell proliferation (GO:0030889)	2/10	0.0194165	0.138728	0	0	11.1338	43.8855	IL10;TNFRSF21
negative regulation of stem cell differentiation (GO:2000737)	2/10	0.0194165	0.138728	0	0	11.1338	43.8855	JAG1;HES1
regulation of plasminogen activation (GO:0010755)	2/10	0.0194165	0.138728	0	0	11.1338	43.8855	SERPINE1;THBS1
smooth muscle cell differentiation (GO:0051145)	2/10	0.0194165	0.138728	0	0	11.1338	43.8855	EDNRB;HEY1
positive regulation of protein metabolic process (GO:0051247)	6/96	0.0195183	0.138728	0	0	2.98375	11.7453	SMURF1;PLK2;WNT5A;TNFAIP3;INHBA;EREG
regulation of cell death (GO:0010941)	6/96	0.0195183	0.138728	0	0	2.98375	11.7453	WNT11;RIPK2;ZC3H12A;WISP1;NKX3-1;IER3
negative regulation of I-kappaB kinase/NF-kappaB signaling (GO:0043124)	4/47	0.0197211	0.139288	0	0	4.15433	16.3102	IL10;PER1;ZC3H12A;TNFAIP3
regulation of intrinsic apoptotic signaling pathway (GO:2001242)	4/47	0.0197211	0.139288	0	0	4.15433	16.3102	PLAUR;PPIF;PMAIP1;NKX3-1
actomyosin structure organization (GO:0031032)	5/71	0.0202078	0.142278	0	0	3.38702	13.2151	EPB41L4B;MYBPC2;ACTN2;TCAP;PHACTR1
MAPK cascade (GO:0000165)	12/278	0.0210232	0.145394	0	0	2.02881	7.83554	SPTBN4;FGF9;ACTN2;RIPK2;IL1B;FGF18;CAMK2A;FGFR4;MET;IL2;EREG;HBEGF
negative regulation of synaptic transmission (GO:0050805)	3/27	0.0210387	0.145394	0	0	5.57506	21.5275	ACHE;PLK2;IL1B
regulation of extrinsic apoptotic signaling pathway in absence of ligand (GO:2001239)	3/27	0.0210387	0.145394	0	0	5.57506	21.5275	IL1A;IL1B;INHBA
negative regulation of cell-matrix adhesion (GO:0001953)	3/27	0.0210387	0.145394	0	0	5.57506	21.5275	JAG1;SERPINE1;THBS1
regulation of vascular endothelial growth factor production (GO:0010574)	3/27	0.0210387	0.145394	0	0	5.57506	21.5275	IL1A;IL1B;HIF1A
muscle fiber development (GO:0048747)	3/27	0.0210387	0.145394	0	0	5.57506	21.5275	TCAP;DMD;VEGFA
cellular response to mechanical stimulus (GO:0071260)	4/48	0.0211502	0.145716	0	0	4.0597	15.6546	GADD45A;IL1B;CHEK1;PDE2A
regulation of epithelial cell proliferation (GO:0050678)	5/72	0.0213357	0.145918	0	0	3.3363	12.836	DUSP10;NR4A3;NKX3-1;EREG;VEGFA
negative regulation of cell cycle (GO:0045786)	5/72	0.0213357	0.145918	0	0	3.3363	12.836	IL10;TSPYL2;BTG3;INHBA;NKX3-1
response to molecule of bacterial origin (GO:0002237)	6/98	0.0213745	0.145918	0	0	2.91859	11.2236	IL10;TNFAIP3;CXCL1;CXCL3;CXCL2;TNFRSF21
positive regulation of inflammatory response (GO:0050729)	5/73	0.0225039	0.1527	0	0	3.28707	12.4714	SERPINE1;WNT5A;PDE2A;OSM;IL2
positive regulation of cytokine secretion (GO:0050715)	5/73	0.0225039	0.1527	0	0	3.28707	12.4714	IL10;IL1A;RGCC;WNT5A;CRLF2
positive regulation of phosphate metabolic process (GO:0045937)	3/28	0.0231867	0.152709	0	0	5.35178	20.145	FZD7;THBS1;EREG
positive regulation of sprouting angiogenesis (GO:1903672)	3/28	0.0231867	0.152709	0	0	5.35178	20.145	PPP1R16B;FOXC2;VEGFA
neural crest cell migration (GO:0001755)	3/28	0.0231867	0.152709	0	0	5.35178	20.145	SEMA7A;SEMA3B;SEMA3F
ventricular septum development (GO:0003281)	3/28	0.0231867	0.152709	0	0	5.35178	20.145	HEY1;HES1;SMAD7
nucleotide-binding oligomerization domain containing signaling pathway (GO:0070423)	3/28	0.0231867	0.152709	0	0	5.35178	20.145	IRAK2;RIPK2;TNFAIP3
positive regulation of endothelial cell apoptotic process (GO:2000353)	2/11	0.0233891	0.152709	0	0	9.89623	37.1652	RGCC;THBS1
replicative senescence (GO:0090399)	2/11	0.0233891	0.152709	0	0	9.89623	37.1652	CHEK1;SERPINE1
positive regulation of extracellular matrix organization (GO:1903055)	2/11	0.0233891	0.152709	0	0	9.89623	37.1652	RGCC;DDR2
positive regulation of receptor biosynthetic process (GO:0010870)	2/11	0.0233891	0.152709	0	0	9.89623	37.1652	HIF1A;HOXA5
positive regulation of transcription from RNA polymerase II promoter in response to endoplasmic reticulum stress (GO:1990440)	2/11	0.0233891	0.152709	0	0	9.89623	37.1652	DDIT3;ATF3
negative regulation of receptor binding (GO:1900121)	2/11	0.0233891	0.152709	0	0	9.89623	37.1652	IL10;NKX3-1
positive regulation of heterotypic cell-cell adhesion (GO:0034116)	2/11	0.0233891	0.152709	0	0	9.89623	37.1652	IL10;IL1B
regulation of receptor biosynthetic process (GO:0010869)	2/11	0.0233891	0.152709	0	0	9.89623	37.1652	HIF1A;HOXA5
positive regulation of defense response (GO:0031349)	5/74	0.0237128	0.154374	0	0	3.23926	12.1205	SERPINE1;WNT5A;PDE2A;IL2;EREG
wound healing (GO:0042060)	4/50	0.0241945	0.156602	0	0	3.8828	14.4503	EPB41L4B;FZD7;WNT5A;EREG
heart morphogenesis (GO:0003007)	4/50	0.0241945	0.156602	0	0	3.8828	14.4503	HEY1;TCAP;HES1;VEGFA
regulation of kinase activity (GO:0043549)	6/101	0.0243768	0.157328	0	0	2.82599	10.4961	TSPYL2;NTRK2;ROR1;FGFR4;MET;DDR2
negative regulation of phosphorylation (GO:0042326)	5/75	0.0249628	0.160649	0	0	3.19282	11.7827	MLXIPL;CDKN1A;ZC3H12A;PPIF;INHBA
cardiac muscle cell action potential (GO:0086001)	3/29	0.0254492	0.161011	0	0	5.14568	18.8902	DMD;SCN4B;CACNA1G
positive regulation of myeloid cell differentiation (GO:0045639)	3/29	0.0254492	0.161011	0	0	5.14568	18.8902	INHBA;HIF1A;HOXA5
negative regulation of Notch signaling pathway (GO:0045746)	3/29	0.0254492	0.161011	0	0	5.14568	18.8902	DLL4;HEY1;NRARP
regulation of neutrophil chemotaxis (GO:0090022)	3/29	0.0254492	0.161011	0	0	5.14568	18.8902	CXCL1;CXCL3;CXCL2
regulation of activated T cell proliferation (GO:0046006)	3/29	0.0254492	0.161011	0	0	5.14568	18.8902	TNFSF9;ICOSLG;IL2
amino acid transmembrane transport (GO:0003333)	3/29	0.0254492	0.161011	0	0	5.14568	18.8902	SLC7A5;SLC7A11;SLC38A3
positive regulation of developmental growth (GO:0048639)	4/51	0.0258109	0.162841	0	0	3.79999	13.8964	GH1;SEMA7A;UNC13A;SMURF1
transforming growth factor beta receptor signaling pathway (GO:0007179)	5/76	0.0262543	0.164713	0	0	3.14769	11.4574	GDF15;SMURF1;ID1;FMOD;FERMT2
negative regulation of extrinsic apoptotic signaling pathway (GO:2001237)	5/76	0.0262543	0.164713	0	0	3.14769	11.4574	IL1A;IL1B;SERPINE1;TNFAIP3;THBS1
positive regulation of proteolysis (GO:0045862)	4/52	0.0274906	0.1649	0	0	3.72063	13.3716	IL1B;ZC3H12A;SNX9;FGFR4
positive regulation of secretion by cell (GO:1903532)	4/52	0.0274906	0.1649	0	0	3.72063	13.3716	ACHE;IL1A;RGCC;STX1A
regulation of mesenchymal cell proliferation (GO:0010464)	2/12	0.0276629	0.1649	0	0	8.90615	31.9523	WNT5A;VEGFA
ribose phosphate metabolic process (GO:0019693)	2/12	0.0276629	0.1649	0	0	8.90615	31.9523	PHACTR1;DDR2
pentose-phosphate shunt (GO:0006098)	2/12	0.0276629	0.1649	0	0	8.90615	31.9523	PHACTR1;DDR2
regulation of cytokine biosynthetic process (GO:0042035)	2/12	0.0276629	0.1649	0	0	8.90615	31.9523	PRG2;EREG
regulation of interleukin-2 biosynthetic process (GO:0045076)	2/12	0.0276629	0.1649	0	0	8.90615	31.9523	IL1A;IL1B
positive regulation of branching involved in ureteric bud morphogenesis (GO:0090190)	2/12	0.0276629	0.1649	0	0	8.90615	31.9523	SMO;VEGFA
plasminogen activation (GO:0031639)	2/12	0.0276629	0.1649	0	0	8.90615	31.9523	PLAU;PLAT
collagen metabolic process (GO:0032963)	2/12	0.0276629	0.1649	0	0	8.90615	31.9523	COL1A1;HIF1A
cardiac muscle fiber development (GO:0048739)	2/12	0.0276629	0.1649	0	0	8.90615	31.9523	TCAP;VEGFA
negative regulation of ATP metabolic process (GO:1903579)	2/12	0.0276629	0.1649	0	0	8.90615	31.9523	MLXIPL;PPIF
PERK-mediated unfolded protein response (GO:0036499)	2/12	0.0276629	0.1649	0	0	8.90615	31.9523	DDIT3;ATF3
regulation of hormone secretion (GO:0046883)	2/12	0.0276629	0.1649	0	0	8.90615	31.9523	LIF;OSM
negative regulation of fibroblast growth factor receptor signaling pathway (GO:0040037)	2/12	0.0276629	0.1649	0	0	8.90615	31.9523	SPRY1;THBS1
negative regulation of interleukin-12 production (GO:0032695)	2/12	0.0276629	0.1649	0	0	8.90615	31.9523	IL10;THBS1
negative regulation of endothelial cell proliferation (GO:0001937)	3/30	0.027826	0.1649	0	0	4.95485	17.7472	DLL4;RGCC;THBS1
regulation of leukocyte chemotaxis (GO:0002688)	3/30	0.027826	0.1649	0	0	4.95485	17.7472	CXCL1;CXCL3;CXCL2
regulation of cell adhesion mediated by integrin (GO:0033628)	3/30	0.027826	0.1649	0	0	4.95485	17.7472	FOXC2;PLAU;SERPINE1
response to estradiol (GO:0032355)	3/30	0.027826	0.1649	0	0	4.95485	17.7472	FOXA1;GH1;NRIP1
regulation of blood coagulation (GO:0030193)	3/30	0.027826	0.1649	0	0	4.95485	17.7472	THBD;SERPINE1;THBS1
cellular response to tumor necrosis factor (GO:0071356)	9/194	0.0285664	0.168842	0	0	2.18176	7.75729	DCSTAMP;CCL24;TNFRSF12A;CCL7;CCL20;ZC3H12A;TNFSF9;TNFRSF21;NKX3-1
G1/S transition of mitotic cell cycle (GO:0000082)	6/105	0.0288007	0.16978	0	0	2.71125	9.61777	PLK3;CDKN1A;PLK2;CAMK2A;SPDYA;INHBA
visual perception (GO:0007601)	5/78	0.0289634	0.170293	0	0	3.06114	10.8417	COL1A1;COL2A1;RGS16;GNAT1;DHRS3
negative regulation of cell-cell adhesion (GO:0022408)	3/31	0.0303167	0.175947	0	0	4.77764	16.7029	IL10;JAG1;RGCC
negative regulation of blood vessel endothelial cell migration (GO:0043537)	3/31	0.0303167	0.175947	0	0	4.77764	16.7029	DLL4;RGCC;THBS1
negative regulation of tumor necrosis factor superfamily cytokine production (GO:1903556)	3/31	0.0303167	0.175947	0	0	4.77764	16.7029	IL10;ZC3H12A;TNFAIP3
regulation of cytokine secretion (GO:0050707)	3/31	0.0303167	0.175947	0	0	4.77764	16.7029	IL10;IL1A;RGCC
sarcomere organization (GO:0045214)	3/31	0.0303167	0.175947	0	0	4.77764	16.7029	MYBPC2;ACTN2;TCAP
extracellular matrix organization (GO:0030198)	10/229	0.0311794	0.180487	0	0	2.04897	7.10581	COL1A1;COL2A1;LAMB3;HAS1;SPOCK2;SERPINE1;COL12A1;MATN1;THBS1;DDR2
regulation of phosphatidylinositol 3-kinase signaling (GO:0014066)	5/80	0.0318431	0.181841	0	0	2.9792	10.2691	PPP1R16B;NTRK2;GH1;NKX3-1;IER3
negative regulation of hemostasis (GO:1900047)	2/13	0.032223	0.181841	0	0	8.09609	27.8107	THBD;SERPINE1
cellular response to nitrogen starvation (GO:0006995)	2/13	0.032223	0.181841	0	0	8.09609	27.8107	GABARAPL1;MAP1LC3B2
Notch receptor processing, ligand-dependent (GO:0035333)	2/13	0.032223	0.181841	0	0	8.09609	27.8107	DLL4;JAG1
striated muscle myosin thick filament assembly (GO:0071688)	2/13	0.032223	0.181841	0	0	8.09609	27.8107	MYBPC2;TCAP
regulation of DNA-templated transcription in response to stress (GO:0043620)	2/13	0.032223	0.181841	0	0	8.09609	27.8107	HSF2;DDIT3
regulation of macrophage differentiation (GO:0045649)	2/13	0.032223	0.181841	0	0	8.09609	27.8107	LIF;INHBA
regulation of endothelial cell chemotaxis (GO:2001026)	2/13	0.032223	0.181841	0	0	8.09609	27.8107	THBS1;MET
regulation of neurotransmitter transport (GO:0051588)	2/13	0.032223	0.181841	0	0	8.09609	27.8107	CAMK2A;SYN1
cellular response to nitrogen levels (GO:0043562)	2/13	0.032223	0.181841	0	0	8.09609	27.8107	GABARAPL1;MAP1LC3B2
endodermal cell differentiation (GO:0035987)	3/32	0.0329208	0.18485	0	0	4.61266	15.746	LAMB3;COL12A1;INHBA
regulation of erythrocyte differentiation (GO:0045646)	3/32	0.0329208	0.18485	0	0	4.61266	15.746	INHBA;HIF1A;HOXA5
BMP signaling pathway (GO:0030509)	5/81	0.0333476	0.185853	0	0	2.93985	9.99777	GDF15;SMURF1;SMAD6;CHRDL1;SMAD7
sensory perception of light stimulus (GO:0050953)	5/81	0.0333476	0.185853	0	0	2.93985	9.99777	COL1A1;COL2A1;RGS16;GNAT1;DHRS3
positive regulation of binding (GO:0051099)	5/81	0.0333476	0.185853	0	0	2.93985	9.99777	RIPK2;BAMBI;PLAUR;HES1;MET
regulation of cell growth (GO:0001558)	9/201	0.0346885	0.192097	0	0	2.10145	7.06372	TSPYL2;DCSTAMP;CDKN1A;WNT11;DACT3;APBB2;INHBA;IL2;CXCL16
autophagosome organization (GO:1905037)	4/56	0.0348506	0.192097	0	0	3.43373	11.5259	GABARAPL1;TP53INP2;MAP1LC3B2;ATG2A
DNA damage response, signal transduction by p53 class mediator (GO:0030330)	5/82	0.0348956	0.192097	0	0	2.90153	9.73576	PLK3;CDKN1A;RGCC;GADD45A;PLK2
positive regulation of protein secretion (GO:0050714)	5/82	0.0348956	0.192097	0	0	2.90153	9.73576	IL10;HCAR2;ACHE;IL1A;RGCC
positive regulation of cell cycle arrest (GO:0071158)	5/82	0.0348956	0.192097	0	0	2.90153	9.73576	PLK3;CDKN1A;RGCC;GADD45A;PLK2
positive regulation of calcium ion transport (GO:0051928)	3/33	0.0356376	0.194749	0	0	4.45868	14.8668	CAMK2A;STC1;FFAR1
positive regulation of intrinsic apoptotic signaling pathway (GO:2001244)	3/33	0.0356376	0.194749	0	0	4.45868	14.8668	DDIT3;PMAIP1;NKX3-1
regulation of interleukin-12 production (GO:0032655)	3/33	0.0356376	0.194749	0	0	4.45868	14.8668	IL10;RIPK2;THBS1
positive regulation of homeostatic process (GO:0032846)	5/83	0.0364875	0.19891	0	0	2.86418	9.48269	HCAR2;DCSTAMP;INHBA;METRNL;HIF1A
positive regulation of neural precursor cell proliferation (GO:2000179)	2/14	0.0370545	0.199101	0	0	7.42103	24.455	DLL4;VEGFA
regulation of activin receptor signaling pathway (GO:0032925)	2/14	0.0370545	0.199101	0	0	7.42103	24.455	FST;SMAD7
regulation of extracellular matrix disassembly (GO:0010715)	2/14	0.0370545	0.199101	0	0	7.42103	24.455	FGFR4;DDR2
negative regulation of cell migration involved in sprouting angiogenesis (GO:0090051)	2/14	0.0370545	0.199101	0	0	7.42103	24.455	DLL4;THBS1
positive regulation of vascular smooth muscle cell proliferation (GO:1904707)	2/14	0.0370545	0.199101	0	0	7.42103	24.455	IL10;FGF9
positive regulation of calcium ion-dependent exocytosis (GO:0045956)	2/14	0.0370545	0.199101	0	0	7.42103	24.455	STX1A;CACNA1G
regulation of I-kappaB kinase/NF-kappaB signaling (GO:0043122)	9/204	0.0375696	0.201387	0	0	2.0688	6.7889	IL1A;PER1;RIPK2;PLK2;IL1B;ZC3H12A;WNT5A;TNFAIP3;ROR1
positive regulation of macromolecule biosynthetic process (GO:0010557)	7/142	0.0381666	0.204101	0	0	2.32067	7.57883	RGCC;NAMPT;FGFR4;HIF1A;THBS1;HOXA5;EREG
apoptotic mitochondrial changes (GO:0008637)	3/34	0.0384662	0.204244	0	0	4.31463	14.0569	CAMK2A;PPIF;HK2
positive regulation of chemokine production (GO:0032722)	3/34	0.0384662	0.204244	0	0	4.31463	14.0569	IL1B;WNT5A;HIF1A
regulation of interleukin-1 beta secretion (GO:0050706)	3/34	0.0384662	0.204244	0	0	4.31463	14.0569	RIPK2;ZC3H12A;WNT5A
positive regulation of apoptotic process (GO:0043065)	12/307	0.0405084	0.213666	0	0	1.82662	5.8566	PXT1;FOXA1;GADD45B;TNFRSF12A;GADD45A;STK17A;DDIT3;ZC3H12A;PMAIP1;HOXA5;GADD45G;NKX3-1
regulation of protein metabolic process (GO:0051246)	4/59	0.0410497	0.213666	0	0	3.24593	10.3642	ABTB2;PLAUR;PRG2;CNDP1
regulation of cyclin-dependent protein kinase activity (GO:1904029)	3/35	0.0414057	0.213666	0	0	4.17958	13.3092	CDKN1A;SERTAD1;GADD45A
negative regulation of cell-substrate adhesion (GO:0010812)	3/35	0.0414057	0.213666	0	0	4.17958	13.3092	JAG1;FZD7;THBS1
endothelial cell migration (GO:0043542)	3/35	0.0414057	0.213666	0	0	4.17958	13.3092	PIK3CA;ID1;VEGFA
regulation of sodium ion transport (GO:0002028)	3/35	0.0414057	0.213666	0	0	4.17958	13.3092	SPTBN4;PER1;SCN4B
carboxylic acid transmembrane transport (GO:1905039)	3/35	0.0414057	0.213666	0	0	4.17958	13.3092	SLC7A5;SLC7A11;SLC38A3
negative regulation of tumor necrosis factor production (GO:0032720)	3/35	0.0414057	0.213666	0	0	4.17958	13.3092	IL10;ZC3H12A;TNFAIP3
atrioventricular valve morphogenesis (GO:0003181)	2/15	0.0421434	0.213666	0	0	6.84983	21.6912	HEY1;SMAD6
regulation of branching involved in ureteric bud morphogenesis (GO:0090189)	2/15	0.0421434	0.213666	0	0	6.84983	21.6912	SMO;VEGFA
phosphatidylethanolamine biosynthetic process (GO:0006646)	2/15	0.0421434	0.213666	0	0	6.84983	21.6912	CHKA;ETNK2
positive regulation of mesonephros development (GO:0061213)	2/15	0.0421434	0.213666	0	0	6.84983	21.6912	SMO;VEGFA
regulation of tumor necrosis factor secretion (GO:1904467)	2/15	0.0421434	0.213666	0	0	6.84983	21.6912	WNT5A;ZC3H12A
negative regulation of coagulation (GO:0050819)	2/15	0.0421434	0.213666	0	0	6.84983	21.6912	THBD;SERPINE1
negative regulation of lipid catabolic process (GO:0050995)	2/15	0.0421434	0.213666	0	0	6.84983	21.6912	HCAR2;IL1B
cellular response to virus (GO:0098586)	2/15	0.0421434	0.213666	0	0	6.84983	21.6912	ZC3H12A;VWCE
positive regulation of acute inflammatory response (GO:0002675)	2/15	0.0421434	0.213666	0	0	6.84983	21.6912	IL1B;OSM
positive regulation of membrane protein ectodomain proteolysis (GO:0051044)	2/15	0.0421434	0.213666	0	0	6.84983	21.6912	IL1B;SNX9
negative regulation of cytokine production involved in immune response (GO:0002719)	2/15	0.0421434	0.213666	0	0	6.84983	21.6912	IL10;SMAD7
negative regulation of protein processing (GO:0010955)	2/15	0.0421434	0.213666	0	0	6.84983	21.6912	SERPINE1;THBS1
cell chemotaxis (GO:0060326)	4/60	0.043246	0.217548	0	0	3.18781	10.0124	PIK3CA;CCL20;HBEGF;VEGFA
skeletal system development (GO:0001501)	7/146	0.0432754	0.217548	0	0	2.25342	7.07613	COL1A1;COL2A1;WNT11;COL12A1;WNT5A;STC1;ALPL
cellular response to BMP stimulus (GO:0071773)	5/87	0.0432965	0.217548	0	0	2.7239	8.5522	GDF15;SMURF1;SMAD6;CHRDL1;SMAD7
regulation of MAP kinase activity (GO:0043405)	5/87	0.0432965	0.217548	0	0	2.7239	8.5522	GH1;IL1B;FGF18;SPRY1;VEGFA
cellular response to interferon-gamma (GO:0071346)	6/116	0.0435817	0.218492	0	0	2.43875	7.64088	CCL24;CCL7;CCL20;WNT5A;CAMK2A;OASL
regulation of nitric-oxide synthase activity (GO:0050999)	3/36	0.0444549	0.220897	0	0	4.05272	12.6173	IL1B;NOSTRIN;HIF1A
regulation of response to DNA damage stimulus (GO:2001020)	3/36	0.0444549	0.220897	0	0	4.05272	12.6173	CRY1;NKX3-1;IER3
plasma membrane organization (GO:0007009)	3/36	0.0444549	0.220897	0	0	4.05272	12.6173	CXCR4;SNX9;A4GALT
Wnt signaling pathway, calcium modulating pathway (GO:0007223)	3/36	0.0444549	0.220897	0	0	4.05272	12.6173	WNT11;CAMK2A;WNT5A
activation of MAPK activity (GO:0000187)	6/117	0.0451226	0.22372	0	0	2.41665	7.48768	IRAK2;RIPK2;IL1B;WNT5A;CXCR4;THBS1
positive regulation of T cell proliferation (GO:0042102)	4/61	0.0455072	0.22513	0	0	3.13172	9.67665	IL1B;TNFSF9;ICOSLG;IL2
peptidyl-threonine dephosphorylation (GO:0035970)	2/16	0.047476	0.226393	0	0	6.36023	19.383	DUSP4;DUSP10
positive regulation of epithelial cell apoptotic process (GO:1904037)	2/16	0.047476	0.226393	0	0	6.36023	19.383	RGCC;THBS1
negative regulation of NF-kappaB import into nucleus (GO:0042347)	2/16	0.047476	0.226393	0	0	6.36023	19.383	IL10;ZC3H12A
Notch receptor processing (GO:0007220)	2/16	0.047476	0.226393	0	0	6.36023	19.383	DLL4;JAG1
establishment of skin barrier (GO:0061436)	2/16	0.047476	0.226393	0	0	6.36023	19.383	CLDN1;MET
glucose 6-phosphate metabolic process (GO:0051156)	2/16	0.047476	0.226393	0	0	6.36023	19.383	PHACTR1;DDR2
positive regulation of regulated secretory pathway (GO:1903307)	2/16	0.047476	0.226393	0	0	6.36023	19.383	STX1A;CACNA1G
regulation of water loss via skin (GO:0033561)	2/16	0.047476	0.226393	0	0	6.36023	19.383	CLDN1;MET
negative regulation of transcription regulatory region DNA binding (GO:2000678)	2/16	0.047476	0.226393	0	0	6.36023	19.383	HEY1;DDIT3
positive regulation of immune system process (GO:0002684)	2/16	0.047476	0.226393	0	0	6.36023	19.383	HCAR2;VEGFA
T cell migration (GO:0072678)	2/16	0.047476	0.226393	0	0	6.36023	19.383	CCL20;CXCL16
mRNA transcription from RNA polymerase II promoter (GO:0042789)	2/16	0.047476	0.226393	0	0	6.36023	19.383	DDIT3;HIF1A
positive regulation of cell migration involved in sprouting angiogenesis (GO:0090050)	2/16	0.047476	0.226393	0	0	6.36023	19.383	FOXC2;VEGFA
cardiac epithelial to mesenchymal transition (GO:0060317)	2/16	0.047476	0.226393	0	0	6.36023	19.383	HEY1;SPRY1
regulation of glucose transport (GO:0010827)	2/16	0.047476	0.226393	0	0	6.36023	19.383	NR4A3;IL1B
positive regulation of response to endoplasmic reticulum stress (GO:1905898)	2/16	0.047476	0.226393	0	0	6.36023	19.383	DDIT3;PMAIP1
regulation of intrinsic apoptotic signaling pathway in response to DNA damage (GO:1902229)	2/16	0.047476	0.226393	0	0	6.36023	19.383	SNAI1;ACKR3
negative regulation of intrinsic apoptotic signaling pathway (GO:2001243)	4/62	0.0478333	0.226653	0	0	3.07757	9.35591	PLAUR;PPIF;SNAI1;ACKR3
negative regulation of peptidase activity (GO:0010466)	4/62	0.0478333	0.226653	0	0	3.07757	9.35591	SERPINB2;SPOCK2;SERPINE1;EPPIN
regulation of T cell proliferation (GO:0042129)	4/62	0.0478333	0.226653	0	0	3.07757	9.35591	IL10;IL1B;TNFRSF21;IL2
regulation of proteolysis (GO:0030162)	4/63	0.050224	0.23748	0	0	3.02525	9.04931	ABTB2;PLAUR;PLAT;FGFR4
regulation of protein catabolic process (GO:0042176)	5/91	0.0508194	0.238562	0	0	2.59668	7.73674	SMURF1;PLK2;WNT5A;EEF1A2;TNFAIP3
positive regulation of neuron death (GO:1901216)	3/38	0.0508776	0.238562	0	0	3.82074	11.3794	DDIT3;WNT5A;DDIT4
mitochondrion disassembly (GO:0061726)	3/38	0.0508776	0.238562	0	0	3.82074	11.3794	GABARAPL1;MAP1LC3B2;ATG2A
regulation of ossification (GO:0030278)	3/38	0.0508776	0.238562	0	0	3.82074	11.3794	WNT5A;SMAD6;DDR2
protein oligomerization (GO:0051259)	9/217	0.051933	0.242619	0	0	1.9382	5.73281	PANX2;MPP2;DDIT3;DPYSL3;ZC3H12A;TNFAIP3;LY6G6C;EPPIN;CLDN1
positive regulation of cell adhesion (GO:0045785)	4/64	0.0526793	0.242619	0	0	2.97468	8.75605	EPB41L4B;FOXC2;VEGFA;SMAD7
regulation of insulin-like growth factor receptor signaling pathway (GO:0043567)	2/17	0.0530391	0.242619	0	0	5.93591	17.4322	GH1;NKX3-1
positive regulation of lymphocyte migration (GO:2000403)	2/17	0.0530391	0.242619	0	0	5.93591	17.4322	CCL7;CCL20
cardiac muscle cell contraction (GO:0086003)	2/17	0.0530391	0.242619	0	0	5.93591	17.4322	SCN4B;CACNA1G
regulation of lipid catabolic process (GO:0050994)	2/17	0.0530391	0.242619	0	0	5.93591	17.4322	HCAR2;IL1B
positive regulation of fatty acid metabolic process (GO:0045923)	2/17	0.0530391	0.242619	0	0	5.93591	17.4322	MLXIPL;NR4A3
positive regulation of dendrite extension (GO:1903861)	2/17	0.0530391	0.242619	0	0	5.93591	17.4322	UNC13A;SMURF1
regulation of myelination (GO:0031641)	2/17	0.0530391	0.242619	0	0	5.93591	17.4322	LGI4;TNFRSF21
positive regulation of macrophage activation (GO:0043032)	2/17	0.0530391	0.242619	0	0	5.93591	17.4322	WNT5A;THBS1
positive chemotaxis (GO:0050918)	2/17	0.0530391	0.242619	0	0	5.93591	17.4322	MET;VEGFA
membrane depolarization during cardiac muscle cell action potential (GO:0086012)	2/17	0.0530391	0.242619	0	0	5.93591	17.4322	SCN4B;CACNA1G
ERBB2 signaling pathway (GO:0038128)	3/39	0.0542483	0.247646	0	0	3.71442	10.8245	PIK3CA;EREG;HBEGF
regulation of transcription from RNA polymerase II promoter in response to stress (GO:0043618)	5/93	0.0548503	0.249886	0	0	2.5374	7.36645	HSF2;CHEK1;HIF1A;ATF3;VEGFA
positive regulation of protein modification by small protein conjugation or removal (GO:1903322)	4/65	0.0551989	0.250458	0	0	2.92576	8.47538	RASD2;RIPK2;ZC3H12A;SMAD7
negative regulation of cell adhesion (GO:0007162)	4/65	0.0551989	0.250458	0	0	2.92576	8.47538	JAG1;FZD7;SERPINE1;RND1
negative regulation of macromolecule metabolic process (GO:0010605)	6/124	0.0568547	0.256218	0	0	2.27247	6.51576	DLL4;SMO;ZC3H12A;HIF1A;NKX3-1;VEGFA
cellular response to fibroblast growth factor stimulus (GO:0044344)	5/94	0.0569332	0.256218	0	0	2.50876	7.1898	DLL4;SPRED2;FGF9;FGF18;FGFR4
transmembrane receptor protein tyrosine kinase signaling pathway (GO:0007169)	14/396	0.0571654	0.256218	0	0	1.64595	4.7104	NTRK2;FOXC2;SDC2;PLAT;SHB;VEGFA;GH1;SPRED2;FGF9;PIK3CA;DDIT4;FGF18;FGFR4;DDR2
negative regulation of gene expression (GO:0010629)	20/618	0.0572144	0.256218	0	0	1.50629	4.30941	WNT5A;ZBTB21;ARID5A;HIF1A;EREG;VEGFA;DLL4;MLXIPL;PER1;WNT11;HEY1;SMO;DDIT3;ZC3H12A;ID1;BHLHE40;CRY1;ID3;HES1;NKX3-1
embryonic heart tube morphogenesis (GO:0003143)	3/40	0.0577233	0.256218	0	0	3.61385	10.307	VANGL2;SMO;HES1
autophagy of mitochondrion (GO:0000422)	3/40	0.0577233	0.256218	0	0	3.61385	10.307	GABARAPL1;MAP1LC3B2;ATG2A
ameboidal-type cell migration (GO:0001667)	3/40	0.0577233	0.256218	0	0	3.61385	10.307	SEMA7A;SEMA3B;SEMA3F
androgen receptor signaling pathway (GO:0030521)	3/40	0.0577233	0.256218	0	0	3.61385	10.307	NRIP1;PMEPA1;NKX3-1
negative regulation of ERK1 and ERK2 cascade (GO:0070373)	3/40	0.0577233	0.256218	0	0	3.61385	10.307	DUSP4;DUSP10;SPRY1
regulation of release of cytochrome c from mitochondria (GO:0090199)	3/40	0.0577233	0.256218	0	0	3.61385	10.307	PLAUR;PPIF;PMAIP1
neuron migration (GO:0001764)	3/40	0.0577233	0.256218	0	0	3.61385	10.307	NTRK2;DDIT4;VEGFA
heart trabecula morphogenesis (GO:0061384)	2/18	0.0588201	0.257023	0	0	5.56464	15.7661	DLL4;HEY1
regulation of cAMP-mediated signaling (GO:0043949)	2/18	0.0588201	0.257023	0	0	5.56464	15.7661	RASD2;PDE2A
blood vessel endothelial cell migration (GO:0043534)	2/18	0.0588201	0.257023	0	0	5.56464	15.7661	ID1;VEGFA
glyceraldehyde-3-phosphate metabolic process (GO:0019682)	2/18	0.0588201	0.257023	0	0	5.56464	15.7661	PHACTR1;DDR2
cell-substrate adherens junction assembly (GO:0007045)	2/18	0.0588201	0.257023	0	0	5.56464	15.7661	ACTN2;FERMT2
regulation of dendrite extension (GO:1903859)	2/18	0.0588201	0.257023	0	0	5.56464	15.7661	UNC13A;SMURF1
regulation of smooth muscle cell migration (GO:0014910)	2/18	0.0588201	0.257023	0	0	5.56464	15.7661	PLAU;SERPINE1
focal adhesion assembly (GO:0048041)	2/18	0.0588201	0.257023	0	0	5.56464	15.7661	ACTN2;FERMT2
interleukin-1-mediated signaling pathway (GO:0070498)	5/95	0.059061	0.257575	0	0	2.48076	7.01852	IL1A;IL1R1;RIPK2;IRAK2;IL1B
axonogenesis (GO:0007409)	9/223	0.0596319	0.259496	0	0	1.88327	5.31002	SPTBN4;PIK3CA;TUBB3;WNT5A;SEMA3B;CXCR4;GAB2;SEMA3F;FMOD
cellular protein localization (GO:0034613)	12/327	0.0597326	0.259496	0	0	1.70887	4.81538	RAB30;RAB20;WNT11;SMURF1;ID1;WNT5A;SNX9;DMD;STX1A;FERMT2;RAB33A;SMAD7
mesenchymal cell differentiation (GO:0048762)	3/41	0.0613008	0.264772	0	0	3.51857	9.8237	WNT5A;SNAI1;HIF1A
monocyte chemotaxis (GO:0002548)	3/41	0.0613008	0.264772	0	0	3.51857	9.8237	CCL24;CCL7;CCL20
negative regulation of proteolysis (GO:0045861)	3/41	0.0613008	0.264772	0	0	3.51857	9.8237	IL10;PLAT;EPPIN
negative regulation of response to stimulus (GO:0048585)	6/127	0.0623938	0.267947	0	0	2.21579	6.14724	NTRK2;ZC3H12A;ROR1;FGFR4;MET;DDR2
protein lipidation (GO:0006497)	6/127	0.0623938	0.267947	0	0	2.21579	6.14724	LY6K;ALPL;LYPD3;LY6G6C;ULBP2;MSLN
non-canonical Wnt signaling pathway (GO:0035567)	6/127	0.0623938	0.267947	0	0	2.21579	6.14724	WNT11;SMO;SMURF1;FZD7;WNT5A;CAMK2A
positive regulation of cellular biosynthetic process (GO:0031328)	7/159	0.0628317	0.269313	0	0	2.05932	5.69874	MLXIPL;RGCC;IL1B;FGFR4;HIF1A;THBS1;EREG
positive regulation of GTPase activity (GO:0043547)	8/192	0.0631862	0.269766	0	0	1.94548	5.37276	CCL24;WNT11;CCL7;RGS1;CCL20;RGS16;MTSS1L;SNX9
positive regulation of neuron projection development (GO:0010976)	5/97	0.0634512	0.269766	0	0	2.42658	6.69126	NTRK2;UNC13A;SMURF1;DPYSL3;WNT5A
positive regulation of NF-kappaB transcription factor activity (GO:0051092)	6/128	0.0643086	0.269766	0	0	2.19751	6.03011	IRAK2;RIPK2;IL1B;WNT5A;CAMK2A;ROR1
regulation of protein phosphorylation (GO:0001932)	10/261	0.0646357	0.269766	0	0	1.78479	4.88851	TSPYL2;SPTBN4;NTRK2;GDF15;IL1B;ZC3H12A;PLAUR;INHBA;VEGFA;NKX3-1
negative regulation of lymphocyte activation (GO:0051250)	2/19	0.0648067	0.269766	0	0	5.23704	14.3303	TNFAIP3;SAMSN1
negative regulation of phosphate metabolic process (GO:0045936)	2/19	0.0648067	0.269766	0	0	5.23704	14.3303	CDKN1A;INHBA
NADP metabolic process (GO:0006739)	2/19	0.0648067	0.269766	0	0	5.23704	14.3303	PHACTR1;DDR2
regulation of heterotypic cell-cell adhesion (GO:0034114)	2/19	0.0648067	0.269766	0	0	5.23704	14.3303	IL10;IL1B
negative regulation of lipid metabolic process (GO:0045833)	2/19	0.0648067	0.269766	0	0	5.23704	14.3303	HCAR2;IL1B
osteoclast differentiation (GO:0030316)	2/19	0.0648067	0.269766	0	0	5.23704	14.3303	DCSTAMP;GAB2
cellular polysaccharide biosynthetic process (GO:0033692)	2/19	0.0648067	0.269766	0	0	5.23704	14.3303	B3GNT5;HAS1
macromolecule biosynthetic process (GO:0009059)	2/19	0.0648067	0.269766	0	0	5.23704	14.3303	IL10;COL1A1
negative regulation of calcium ion transport (GO:0051926)	2/19	0.0648067	0.269766	0	0	5.23704	14.3303	STC1;EPPIN
mitochondrial membrane organization (GO:0007006)	2/19	0.0648067	0.269766	0	0	5.23704	14.3303	PPIF;PMAIP1
positive regulation of axon extension (GO:0045773)	2/19	0.0648067	0.269766	0	0	5.23704	14.3303	SEMA7A;VEGFA
cellular response to calcium ion (GO:0071277)	3/42	0.0649794	0.269766	0	0	3.42817	9.37154	CPNE7;WNT5A;PPIF
cellular response to retinoic acid (GO:0071300)	3/42	0.0649794	0.269766	0	0	3.42817	9.37154	WNT11;FZD7;WNT5A
positive regulation of neuron differentiation (GO:0045666)	5/98	0.0657134	0.271809	0	0	2.40036	6.53488	NTRK2;DPYSL3;WNT5A;NBL1;ADRA2B
positive regulation of cell growth (GO:0030307)	5/98	0.0657134	0.271809	0	0	2.40036	6.53488	SEMA7A;UNC13A;SMURF1;IL2;CXCL16
negative regulation of angiogenesis (GO:0016525)	4/69	0.0659138	0.272137	0	0	2.74515	7.46518	RGCC;SERPINE1;THBS1;HOXA5
positive regulation of cell differentiation (GO:0045597)	8/194	0.0662731	0.273118	0	0	1.92436	5.22265	COL1A1;RGCC;BAMBI;IL1B;ZC3H12A;SNAI1;HOXA5;DDR2
glycosaminoglycan biosynthetic process (GO:0006024)	5/99	0.0680202	0.276753	0	0	2.37471	6.3831	GALNT5;SDC2;IL1B;HAS1;FMOD
negative regulation of nucleic acid-templated transcription (GO:1903507)	15/444	0.0685251	0.276753	0	0	1.57014	4.20886	WNT5A;ZBTB21;ARID5A;EREG;MLXIPL;PER1;WNT11;HEY1;DDIT3;ID1;BHLHE40;CRY1;ID3;HES1;NKX3-1
regulation of Notch signaling pathway (GO:0008593)	4/70	0.0687498	0.276753	0	0	2.70342	7.23781	DLL4;JAG1;HEY1;NRARP
negative regulation of developmental process (GO:0051093)	4/70	0.0687498	0.276753	0	0	2.70342	7.23781	WNT11;DDIT3;SKIL;NKX3-1
positive regulation of interferon-gamma production (GO:0032729)	3/43	0.068757	0.276753	0	0	3.34229	8.94791	PDE4D;IL1B;PDE4B
regulation of B cell proliferation (GO:0030888)	3/43	0.068757	0.276753	0	0	3.34229	8.94791	IL10;IL2;TNFRSF21
negative regulation of ERBB signaling pathway (GO:1901185)	3/43	0.068757	0.276753	0	0	3.34229	8.94791	SPRY1;EREG;HBEGF
male gonad development (GO:0008584)	3/43	0.068757	0.276753	0	0	3.34229	8.94791	FGF9;WNT5A;INHBA
development of primary male sexual characteristics (GO:0046546)	3/43	0.068757	0.276753	0	0	3.34229	8.94791	FGF9;WNT5A;INHBA
response to unfolded protein (GO:0006986)	3/43	0.068757	0.276753	0	0	3.34229	8.94791	DDIT3;HSPA2;HSPA13
positive regulation of interleukin-6 production (GO:0032755)	3/43	0.068757	0.276753	0	0	3.34229	8.94791	IL1B;WNT5A;EREG
substantia nigra development (GO:0021762)	3/43	0.068757	0.276753	0	0	3.34229	8.94791	FGF9;CKB;SYNGR3
regulation of interferon-gamma production (GO:0032649)	3/43	0.068757	0.276753	0	0	3.34229	8.94791	PDE4D;IL1B;PDE4B
regulation of lipid metabolic process (GO:0019216)	5/100	0.0703714	0.279714	0	0	2.34959	6.23574	IL1B;G0S2;PLIN2;FGFR4;TNFRSF21
negative regulation of innate immune response (GO:0045824)	2/20	0.0709871	0.279714	0	0	4.94584	13.083	TNFAIP3;DCST1
regulation of endoplasmic reticulum stress-induced intrinsic apoptotic signaling pathway (GO:1902235)	2/20	0.0709871	0.279714	0	0	4.94584	13.083	DDIT3;PMAIP1
regulation of regulatory T cell differentiation (GO:0045589)	2/20	0.0709871	0.279714	0	0	4.94584	13.083	DUSP10;IL2
phosphatidylethanolamine metabolic process (GO:0046337)	2/20	0.0709871	0.279714	0	0	4.94584	13.083	CHKA;ETNK2
adenylate cyclase-activating adrenergic receptor signaling pathway (GO:0071880)	2/20	0.0709871	0.279714	0	0	4.94584	13.083	PDE4D;ADRA2B
regulation of response to cytokine stimulus (GO:0060759)	2/20	0.0709871	0.279714	0	0	4.94584	13.083	IRAK2;WNT5A
positive regulation of T cell migration (GO:2000406)	2/20	0.0709871	0.279714	0	0	4.94584	13.083	CCL20;WNT5A
adrenergic receptor signaling pathway (GO:0071875)	2/20	0.0709871	0.279714	0	0	4.94584	13.083	PDE4D;ADRA2B
regulation of fibroblast growth factor receptor signaling pathway (GO:0040036)	2/20	0.0709871	0.279714	0	0	4.94584	13.083	SPRY1;THBS1
negative regulation of interferon-gamma production (GO:0032689)	2/20	0.0709871	0.279714	0	0	4.94584	13.083	ZC3H12A;INHBA
dopaminergic neuron differentiation (GO:0071542)	2/20	0.0709871	0.279714	0	0	4.94584	13.083	FOXA1;VEGFA
glycerophospholipid biosynthetic process (GO:0046474)	7/164	0.0715827	0.281331	0	0	1.99322	5.25592	CDS1;ACHE;CHKA;PIK3CA;ETNK2;CPNE7;PI4K2A
regulation of cation channel activity (GO:2001257)	4/71	0.0716479	0.281331	0	0	2.66293	7.01947	ACTN2;PDE4D;DMD;CNIH2
cellular response to hypoxia (GO:0071456)	6/132	0.0723097	0.282724	0	0	2.12731	5.58802	PLK3;RGCC;PMAIP1;HIF1A;NKX3-1;VEGFA
sprouting angiogenesis (GO:0002040)	3/44	0.072632	0.282724	0	0	3.26061	8.55045	NRARP;THBS1;VEGFA
positive regulation of interleukin-8 production (GO:0032757)	3/44	0.072632	0.282724	0	0	3.26061	8.55045	IL1B;DDIT3;SERPINE1
positive regulation of intracellular transport (GO:0032388)	3/44	0.072632	0.282724	0	0	3.26061	8.55045	PLK3;ACTN2;GAB2
regulation of steroid biosynthetic process (GO:0050810)	3/44	0.072632	0.282724	0	0	3.26061	8.55045	SEC14L2;SC5D;FGFR4
hyaluronan metabolic process (GO:0030212)	2/21	0.0773497	0.297479	0	0	4.68529	11.9916	IL1B;HAS1
positive regulation of transcription from RNA polymerase II promoter involved in cellular response to chemical stimulus (GO:1901522)	2/21	0.0773497	0.297479	0	0	4.68529	11.9916	HIF1A;VEGFA
positive regulation of cellular component movement (GO:0051272)	2/21	0.0773497	0.297479	0	0	4.68529	11.9916	SPOCK2;VEGFA
mesoderm development (GO:0007498)	2/21	0.0773497	0.297479	0	0	4.68529	11.9916	FOXC2;VEGFA
positive regulation of histone acetylation (GO:0035066)	2/21	0.0773497	0.297479	0	0	4.68529	11.9916	IL1B;LIF
negative regulation of cytokine biosynthetic process (GO:0042036)	2/21	0.0773497	0.297479	0	0	4.68529	11.9916	IL10;INHBA
negative regulation of G-protein coupled receptor protein signaling pathway (GO:0045744)	2/21	0.0773497	0.297479	0	0	4.68529	11.9916	CRY1;MET
lymphocyte differentiation (GO:0030098)	4/73	0.0776279	0.298038	0	0	2.58548	6.60804	IL10;DLL4;IL2;RELB
cellular response to organic cyclic compound (GO:0071407)	6/135	0.0786685	0.301518	0	0	2.07752	5.28212	NR4A3;IL1B;ZC3H12A;PDE2A;NRIP1;NKX3-1
regulation of gene expression (GO:0010468)	30/1037	0.0788528	0.301709	0	0	1.34475	3.41589	GCM1;ZNF395;CREM;HIF1A;DLL4;EPB41L4B;WNT11;ZC3H12A;APBB2;OR7D2;NKX3-1;IL10;RBM38;NTRK2;FZD7;WNT5A;INHBA;POU3F1;HIC1;VEGFA;MLXIPL;IL1A;PER1;TOX2;RGCC;SMO;DDIT3;IL1B;BHLHE40;FGFR4
negative regulation of protein modification by small protein conjugation or removal (GO:1903321)	3/46	0.0806664	0.307241	0	0	3.10863	7.82578	CRY1;TNFAIP3;SMAD7
regulation of cellular component movement (GO:0051270)	3/46	0.0806664	0.307241	0	0	3.10863	7.82578	EREG;VEGFA;HBEGF
glucose homeostasis (GO:0042593)	4/74	0.0807088	0.307241	0	0	2.54841	6.41412	MLXIPL;CRY1;FGFR4;HK2
gland development (GO:0048732)	4/75	0.0838494	0.311925	0	0	2.51239	6.22755	WNT11;HES1;MET;NKX3-1
regulation of calcium ion import (GO:0090279)	2/22	0.0838838	0.311925	0	0	4.4508	11.0305	STC1;EPPIN
hematopoietic progenitor cell differentiation (GO:0002244)	2/22	0.0838838	0.311925	0	0	4.4508	11.0305	FST;INHBA
regulation of DNA biosynthetic process (GO:2000278)	2/22	0.0838838	0.311925	0	0	4.4508	11.0305	RGCC;FGFR4
positive regulation of erythrocyte differentiation (GO:0045648)	2/22	0.0838838	0.311925	0	0	4.4508	11.0305	INHBA;HIF1A
negative regulation of sprouting angiogenesis (GO:1903671)	2/22	0.0838838	0.311925	0	0	4.4508	11.0305	DLL4;THBS1
protein localization to cell surface (GO:0034394)	2/22	0.0838838	0.311925	0	0	4.4508	11.0305	WNT11;SMURF1
regulation of cytokine production involved in inflammatory response (GO:1900015)	2/22	0.0838838	0.311925	0	0	4.4508	11.0305	PER1;ZC3H12A
negative regulation of protein import into nucleus (GO:0042308)	2/22	0.0838838	0.311925	0	0	4.4508	11.0305	PDE2A;DACT3
regulation of ERBB signaling pathway (GO:1901184)	2/22	0.0838838	0.311925	0	0	4.4508	11.0305	EREG;HBEGF
cellular response to unfolded protein (GO:0034620)	2/22	0.0838838	0.311925	0	0	4.4508	11.0305	HSPA2;HSPA13
negative regulation of nervous system development (GO:0051961)	2/22	0.0838838	0.311925	0	0	4.4508	11.0305	WNT5A;TNFRSF21
regulation of bone resorption (GO:0045124)	2/22	0.0838838	0.311925	0	0	4.4508	11.0305	DCSTAMP;TNFAIP3
regulation of monocyte chemotaxis (GO:0090025)	2/22	0.0838838	0.311925	0	0	4.4508	11.0305	SERPINE1;NBL1
myofibril assembly (GO:0030239)	3/47	0.0848217	0.314892	0	0	3.03783	7.49494	MYBPC2;ACTN2;TCAP
positive regulation of hydrolase activity (GO:0051345)	7/172	0.0870155	0.322096	0	0	1.8958	4.62891	CCL24;WNT11;CCL7;RGS1;CCL20;RGS16;SNX9
hemopoiesis (GO:0030097)	4/76	0.0870491	0.322096	0	0	2.47737	6.04796	IL10;JAG1;FST;INHBA
regulation of response to external stimulus (GO:0032101)	5/107	0.0880597	0.324233	0	0	2.18756	5.31519	SEMA7A;WNT5A;TNFAIP3;CXCR4;GNAT1
cellular response to starvation (GO:0009267)	5/107	0.0880597	0.324233	0	0	2.18756	5.31519	GABARAPL1;CDKN1A;ZC3H12A;MAP1LC3B2;PMAIP1
positive regulation of cell cycle process (GO:0090068)	5/107	0.0880597	0.324233	0	0	2.18756	5.31519	IL1A;RGCC;IL1B;CXCR5;EREG
amino acid transport (GO:0006865)	3/48	0.0890665	0.327403	0	0	2.97017	7.18297	SLC7A5;SLC7A11;SLC38A3
regulation of protein oligomerization (GO:0032459)	2/23	0.0905785	0.328658	0	0	4.23864	10.1793	PMAIP1;SNX9
positive regulation of protein oligomerization (GO:0032461)	2/23	0.0905785	0.328658	0	0	4.23864	10.1793	PMAIP1;SNX9
negative regulation of signal transduction in absence of ligand (GO:1901099)	2/23	0.0905785	0.328658	0	0	4.23864	10.1793	IL1A;IL1B
negative regulation of extrinsic apoptotic signaling pathway in absence of ligand (GO:2001240)	2/23	0.0905785	0.328658	0	0	4.23864	10.1793	IL1A;IL1B
regulation of monooxygenase activity (GO:0032768)	2/23	0.0905785	0.328658	0	0	4.23864	10.1793	IL1B;NOSTRIN
regulation of release of sequestered calcium ion into cytosol by sarcoplasmic reticulum (GO:0010880)	2/23	0.0905785	0.328658	0	0	4.23864	10.1793	PDE4D;DMD
positive regulation of ion transmembrane transporter activity (GO:0032414)	2/23	0.0905785	0.328658	0	0	4.23864	10.1793	ACTN2;DMD
positive regulation of monooxygenase activity (GO:0032770)	2/23	0.0905785	0.328658	0	0	4.23864	10.1793	IL1B;HIF1A
regulation of cytokine production (GO:0001817)	5/108	0.0907594	0.328783	0	0	2.16621	5.19791	PER1;CD83;PRG2;ICOSLG;EREG
gonad development (GO:0008406)	3/49	0.0933986	0.336444	0	0	2.90545	6.88847	FGF9;WNT5A;INHBA
Wnt signaling pathway (GO:0016055)	5/109	0.0935016	0.336444	0	0	2.14527	5.0838	WNT11;SMO;FZD7;WNT5A;FERMT2
sensory perception of mechanical stimulus (GO:0050954)	4/78	0.0936232	0.336444	0	0	2.41017	5.70843	COL1A1;SPTBN4;COL2A1;ROR1
fibroblast growth factor receptor signaling pathway (GO:0008543)	4/78	0.0936232	0.336444	0	0	2.41017	5.70843	SPRED2;FGF9;FGF18;FGFR4
negative regulation of inflammatory response (GO:0050728)	4/78	0.0936232	0.336444	0	0	2.41017	5.70843	IL10;ZC3H12A;TNFAIP3;METRNL
negative regulation of cytokine production (GO:0001818)	5/110	0.0962858	0.342203	0	0	2.12473	4.97278	IL10;RGCC;ZC3H12A;TNFAIP3;THBS1
nucleosome organization (GO:0034728)	4/79	0.0969961	0.342203	0	0	2.37791	5.54787	HIST1H2BO;HIST3H2A;H2AFX;HIST1H2BB
response to calcium ion (GO:0051592)	4/79	0.0969961	0.342203	0	0	2.37791	5.54787	CPNE7;WNT5A;PPIF;THBS1
membrane protein intracellular domain proteolysis (GO:0031293)	2/24	0.0974238	0.342203	0	0	4.04577	9.42131	DLL4;JAG1
negative regulation of G1/S transition of mitotic cell cycle (GO:2000134)	2/24	0.0974238	0.342203	0	0	4.04577	9.42131	PLK3;CDKN1A
regulation of epidermal growth factor-activated receptor activity (GO:0007176)	2/24	0.0974238	0.342203	0	0	4.04577	9.42131	GPRC5A;EREG
eosinophil chemotaxis (GO:0048245)	2/24	0.0974238	0.342203	0	0	4.04577	9.42131	CCL24;CCL7
regulation of chemotaxis (GO:0050920)	2/24	0.0974238	0.342203	0	0	4.04577	9.42131	CXCR4;THBS1
negative regulation of endothelial cell apoptotic process (GO:2000352)	2/24	0.0974238	0.342203	0	0	4.04577	9.42131	SERPINE1;TNFAIP3
eosinophil migration (GO:0072677)	2/24	0.0974238	0.342203	0	0	4.04577	9.42131	CCL24;CCL7
chaperone mediated protein folding requiring cofactor (GO:0051085)	2/24	0.0974238	0.342203	0	0	4.04577	9.42131	HSPA2;HSPA13
regulation of neuronal synaptic plasticity (GO:0048168)	2/24	0.0974238	0.342203	0	0	4.04577	9.42131	CAMK2A;SLC8A2
negative regulation of T cell proliferation (GO:0042130)	2/24	0.0974238	0.342203	0	0	4.04577	9.42131	IL10;TNFRSF21
negative regulation of intrinsic apoptotic signaling pathway in response to DNA damage (GO:1902230)	2/24	0.0974238	0.342203	0	0	4.04577	9.42131	SNAI1;ACKR3
regulation of cellular protein metabolic process (GO:0032268)	3/50	0.0978159	0.342203	0	0	2.84349	6.61016	EDNRB;INHBA;CNDP1
myeloid leukocyte differentiation (GO:0002573)	3/50	0.0978159	0.342203	0	0	2.84349	6.61016	DCSTAMP;GAB2;VEGFA
negative regulation of protein ubiquitination (GO:0031397)	3/50	0.0978159	0.342203	0	0	2.84349	6.61016	CRY1;TNFAIP3;SMAD7
protein phosphorylation (GO:0006468)	15/470	0.0987708	0.345007	0	0	1.47841	3.42245	NTRK2;PNCK;PLK2;CAMK2A;CAMKK1;SMAD7;WNT11;PIK3CA;STK17A;IRAK2;CHEK1;CRY1;FGFR4;CAMK1G;DDR2
negative regulation of MAPK cascade (GO:0043409)	4/80	0.100425	0.350241	0	0	2.3465	5.39306	DUSP4;DUSP10;IL1B;SPRY1
negative regulation of cellular macromolecule biosynthetic process (GO:2000113)	16/512	0.10359	0.356932	0	0	1.44691	3.28059	TSPYL2;WNT5A;ZBTB21;ARID5A;EREG;MLXIPL;PER1;WNT11;HEY1;DDIT3;ID1;BHLHE40;CRY1;ID3;HES1;NKX3-1
sensory perception of sound (GO:0007605)	4/81	0.10391	0.356932	0	0	2.31591	5.24376	COL1A1;SPTBN4;COL2A1;ROR1
regulation of cell cycle (GO:0051726)	8/215	0.104232	0.356932	0	0	1.72726	3.90557	TSPYL2;GADD45B;GADD45A;CHEK1;ID1;ID3;INHBA;GADD45G
regulation of voltage-gated calcium channel activity (GO:1901385)	2/25	0.10441	0.356932	0	0	3.86966	8.74325	PDE4B;DMD
neutral amino acid transport (GO:0015804)	2/25	0.10441	0.356932	0	0	3.86966	8.74325	SLC7A5;SLC38A3
regulation of ryanodine-sensitive calcium-release channel activity (GO:0060314)	2/25	0.10441	0.356932	0	0	3.86966	8.74325	PDE4D;DMD
positive regulation of interleukin-1 beta secretion (GO:0050718)	2/25	0.10441	0.356932	0	0	3.86966	8.74325	RIPK2;WNT5A
cellular response to vascular endothelial growth factor stimulus (GO:0035924)	2/25	0.10441	0.356932	0	0	3.86966	8.74325	DLL4;VEGFA
negative regulation of epithelial to mesenchymal transition (GO:0010719)	2/25	0.10441	0.356932	0	0	3.86966	8.74325	FOXA1;SMAD7
peptidyl-tyrosine dephosphorylation (GO:0035335)	2/25	0.10441	0.356932	0	0	3.86966	8.74325	DUSP4;DUSP10
regulation of vascular smooth muscle cell proliferation (GO:1904705)	2/25	0.10441	0.356932	0	0	3.86966	8.74325	IL10;FGF9
L-amino acid transport (GO:0015807)	2/25	0.10441	0.356932	0	0	3.86966	8.74325	SLC7A5;SLC38A3
regulation of protein import into nucleus (GO:0042306)	2/25	0.10441	0.356932	0	0	3.86966	8.74325	FZD7;ZC3H12A
regulation of calcium ion transport (GO:0051924)	3/52	0.106897	0.364327	0	0	2.72715	6.09759	CAMK2A;STC1;FFAR1
regulation of cell-matrix adhesion (GO:0001952)	3/52	0.106897	0.364327	0	0	2.72715	6.09759	JAG1;PLAU;THBS1
modulation of chemical synaptic transmission (GO:0050804)	4/82	0.107449	0.364547	0	0	2.2861	5.09969	UNC13A;IL1B;CAMK2A;SYN1
positive regulation of cell cycle (GO:0045787)	4/82	0.107449	0.364547	0	0	2.2861	5.09969	FOXA1;MLXIPL;CHEK1;NKX3-1
positive regulation of DNA metabolic process (GO:0051054)	4/82	0.107449	0.364547	0	0	2.2861	5.09969	RGCC;H2AFX;FGFR4;EREG
positive regulation of peptidyl-serine phosphorylation (GO:0033138)	4/83	0.111042	0.365961	0	0	2.25705	4.96064	RIPK2;LIF;OSM;VEGFA
regulation of NF-kappaB import into nucleus (GO:0042345)	2/26	0.111527	0.365961	0	0	3.70824	8.13399	IL1B;ZC3H12A
response to ketone (GO:1901654)	2/26	0.111527	0.365961	0	0	3.70824	8.13399	THBS1;NKX3-1
regulation of histone acetylation (GO:0035065)	2/26	0.111527	0.365961	0	0	3.70824	8.13399	IL1B;CHEK1
positive regulation of phosphatidylinositol 3-kinase signaling (GO:0014068)	3/53	0.111557	0.365961	0	0	2.67247	5.8613	NTRK2;GH1;NKX3-1
regulation of calcium ion-dependent exocytosis (GO:0017158)	3/53	0.111557	0.365961	0	0	2.67247	5.8613	SYN1;STX1A;CACNA1G
sphingolipid metabolic process (GO:0006665)	5/116	0.113855	0.365961	0	0	2.00926	4.36578	FUT5;NEU4;ELOVL4;ARSI;FUT3
negative regulation of cell differentiation (GO:0045596)	6/150	0.11496	0.365961	0	0	1.85967	4.0228	FOXA1;JAG1;WNT5A;HES1;SKIL;SMAD7
glycosphingolipid metabolic process (GO:0006687)	3/54	0.116293	0.365961	0	0	2.61993	5.63715	NEU4;ARSI;A4GALT
positive regulation of programmed cell death (GO:0043068)	9/257	0.11657	0.365961	0	0	1.62223	3.48659	PXT1;FOXA1;GADD45B;TNFRSF12A;GADD45A;STK17A;PMAIP1;HOXA5;GADD45G
mitotic cell cycle phase transition (GO:0044772)	8/221	0.116916	0.365961	0	0	1.67808	3.60167	PLK3;CDKN1A;PLK2;CAMK2A;SPDYA;HAUS3;INHBA;PHLDA1
regulation of calcium ion transmembrane transporter activity (GO:1901019)	2/27	0.118766	0.365961	0	0	3.55973	7.58436	PDE4D;DMD
phosphatidylinositol phosphorylation (GO:0046854)	2/27	0.118766	0.365961	0	0	3.55973	7.58436	PIK3CA;PI4K2A
negative regulation of smooth muscle cell proliferation (GO:0048662)	2/27	0.118766	0.365961	0	0	3.55973	7.58436	IL10;TNFAIP3
cardiac muscle cell development (GO:0055013)	2/27	0.118766	0.365961	0	0	3.55973	7.58436	TCAP;VEGFA
regulation of neurotransmitter secretion (GO:0046928)	2/27	0.118766	0.365961	0	0	3.55973	7.58436	CAMK2A;SYN1
cellular response to topologically incorrect protein (GO:0035967)	2/27	0.118766	0.365961	0	0	3.55973	7.58436	HSPA2;HSPA13
positive regulation of protein serine/threonine kinase activity (GO:0071902)	5/118	0.12003	0.365961	0	0	1.97349	4.18382	GH1;IL1B;WNT5A;FGF18;VEGFA
positive regulation of cysteine-type endopeptidase activity (GO:2001056)	3/55	0.121104	0.365961	0	0	2.56942	5.42431	RIPK2;PMAIP1;NKX3-1
fat cell differentiation (GO:0045444)	3/55	0.121104	0.365961	0	0	2.56942	5.42431	NR4A3;METRNL;SMAD6
regulation of phosphorylation (GO:0042325)	5/119	0.123176	0.365961	0	0	1.95608	4.09631	CDKN1A;FZD7;INHBA;THBS1;EREG
vitamin A metabolic process (GO:0006776)	1/6	0.125232	0.365961	0	0	8.88818	18.466	ALDH1A2
negative regulation of membrane potential (GO:0045837)	1/6	0.125232	0.365961	0	0	8.88818	18.466	PMAIP1
regulation of immunoglobulin mediated immune response (GO:0002889)	1/6	0.125232	0.365961	0	0	8.88818	18.466	IL10
regulation of oxidative stress-induced neuron intrinsic apoptotic signaling pathway (GO:1903376)	1/6	0.125232	0.365961	0	0	8.88818	18.466	HIF1A
response to chemokine (GO:1990868)	1/6	0.125232	0.365961	0	0	8.88818	18.466	ZC3H12A
regulation of endothelial cell development (GO:1901550)	1/6	0.125232	0.365961	0	0	8.88818	18.466	IL1B
cellular response to chemokine (GO:1990869)	1/6	0.125232	0.365961	0	0	8.88818	18.466	ZC3H12A
positive regulation of deacetylase activity (GO:0090045)	1/6	0.125232	0.365961	0	0	8.88818	18.466	VEGFA
positive regulation of hormone metabolic process (GO:0032352)	1/6	0.125232	0.365961	0	0	8.88818	18.466	HIF1A
embryonic skeletal joint development (GO:0072498)	1/6	0.125232	0.365961	0	0	8.88818	18.466	COL2A1
mitochondrial ribosome assembly (GO:0061668)	1/6	0.125232	0.365961	0	0	8.88818	18.466	MPV17L2
vascular smooth muscle cell differentiation (GO:0035886)	1/6	0.125232	0.365961	0	0	8.88818	18.466	HES1
striated muscle hypertrophy (GO:0014897)	1/6	0.125232	0.365961	0	0	8.88818	18.466	TCAP
positive regulation of icosanoid secretion (GO:0032305)	1/6	0.125232	0.365961	0	0	8.88818	18.466	IL1B
negative regulation of catecholamine secretion (GO:0033604)	1/6	0.125232	0.365961	0	0	8.88818	18.466	ADRA2B
regulation of nuclease activity (GO:0032069)	1/6	0.125232	0.365961	0	0	8.88818	18.466	OASL
negative regulation of oligodendrocyte differentiation (GO:0048715)	1/6	0.125232	0.365961	0	0	8.88818	18.466	HES1
negative regulation of type I interferon-mediated signaling pathway (GO:0060339)	1/6	0.125232	0.365961	0	0	8.88818	18.466	DCST1
negative regulation of lymphocyte differentiation (GO:0045620)	1/6	0.125232	0.365961	0	0	8.88818	18.466	INHBA
cellular response to monoamine stimulus (GO:0071868)	1/6	0.125232	0.365961	0	0	8.88818	18.466	NR4A3
negative regulation of bone resorption (GO:0045779)	1/6	0.125232	0.365961	0	0	8.88818	18.466	TNFAIP3
nucleotide-binding oligomerization domain containing 2 signaling pathway (GO:0070431)	1/6	0.125232	0.365961	0	0	8.88818	18.466	RIPK2
regulation of cardiac muscle cell apoptotic process (GO:0010665)	1/6	0.125232	0.365961	0	0	8.88818	18.466	CAMK2A
protein deubiquitination involved in ubiquitin-dependent protein catabolic process (GO:0071947)	1/6	0.125232	0.365961	0	0	8.88818	18.466	TNFAIP3
negative regulation of muscle cell apoptotic process (GO:0010656)	1/6	0.125232	0.365961	0	0	8.88818	18.466	ZC3H12A
collagen biosynthetic process (GO:0032964)	1/6	0.125232	0.365961	0	0	8.88818	18.466	COL1A1
phagosome-lysosome fusion (GO:0090385)	1/6	0.125232	0.365961	0	0	8.88818	18.466	RAB20
negative regulation of neurological system process (GO:0031645)	1/6	0.125232	0.365961	0	0	8.88818	18.466	TNFRSF21
regulation of skeletal muscle contraction (GO:0014819)	1/6	0.125232	0.365961	0	0	8.88818	18.466	DMD
negative regulation of neural precursor cell proliferation (GO:2000178)	1/6	0.125232	0.365961	0	0	8.88818	18.466	WNT5A
azole transport (GO:0045117)	1/6	0.125232	0.365961	0	0	8.88818	18.466	SLC38A3
oxygen homeostasis (GO:0032364)	1/6	0.125232	0.365961	0	0	8.88818	18.466	HIF1A
regulation of histone deacetylase activity (GO:1901725)	1/6	0.125232	0.365961	0	0	8.88818	18.466	VEGFA
gap junction assembly (GO:0016264)	1/6	0.125232	0.365961	0	0	8.88818	18.466	GJB2
blood vessel endothelial cell proliferation involved in sprouting angiogenesis (GO:0002043)	1/6	0.125232	0.365961	0	0	8.88818	18.466	NRARP
spinal cord dorsal/ventral patterning (GO:0021513)	1/6	0.125232	0.365961	0	0	8.88818	18.466	DLL4
negative regulation of cAMP-mediated signaling (GO:0043951)	1/6	0.125232	0.365961	0	0	8.88818	18.466	PDE2A
embryonic skeletal joint morphogenesis (GO:0060272)	1/6	0.125232	0.365961	0	0	8.88818	18.466	COL2A1
chemical homeostasis within a tissue (GO:0048875)	1/6	0.125232	0.365961	0	0	8.88818	18.466	VEGFA
regulation of chemokine-mediated signaling pathway (GO:0070099)	1/6	0.125232	0.365961	0	0	8.88818	18.466	HIF1A
Golgi disassembly (GO:0090166)	1/6	0.125232	0.365961	0	0	8.88818	18.466	PLK3
regulation of glial cell differentiation (GO:0045685)	1/6	0.125232	0.365961	0	0	8.88818	18.466	TNFRSF21
positive regulation of catecholamine secretion (GO:0033605)	1/6	0.125232	0.365961	0	0	8.88818	18.466	STX1A
positive regulation of axon guidance (GO:1902669)	1/6	0.125232	0.365961	0	0	8.88818	18.466	VEGFA
regulation of cellular carbohydrate catabolic process (GO:0043471)	1/6	0.125232	0.365961	0	0	8.88818	18.466	PPP1R3B
hormone transport (GO:0009914)	1/6	0.125232	0.365961	0	0	8.88818	18.466	SLCO4A1
protein insertion into mitochondrial membrane involved in apoptotic signaling pathway (GO:0001844)	1/6	0.125232	0.365961	0	0	8.88818	18.466	PMAIP1
positive regulation of histone phosphorylation (GO:0033129)	1/6	0.125232	0.365961	0	0	8.88818	18.466	IL1B
regulation of transforming growth factor beta2 production (GO:0032909)	1/6	0.125232	0.365961	0	0	8.88818	18.466	HIF1A
negative regulation of erythrocyte differentiation (GO:0045647)	1/6	0.125232	0.365961	0	0	8.88818	18.466	HOXA5
positive regulation of transcription from RNA polymerase II promoter in response to heat stress (GO:0061408)	1/6	0.125232	0.365961	0	0	8.88818	18.466	HSF2
regulation of cell cycle checkpoint (GO:1901976)	1/6	0.125232	0.365961	0	0	8.88818	18.466	CRY1
regulation of interleukin-10 secretion (GO:2001179)	1/6	0.125232	0.365961	0	0	8.88818	18.466	TNFRSF21
positive regulation of activation of Janus kinase activity (GO:0010536)	1/6	0.125232	0.365961	0	0	8.88818	18.466	GH1
plasma membrane fusion (GO:0045026)	1/6	0.125232	0.365961	0	0	8.88818	18.466	VASH2
positive regulation of sodium ion transmembrane transport (GO:1902307)	1/6	0.125232	0.365961	0	0	8.88818	18.466	DMD
mesenchymal to epithelial transition involved in metanephros morphogenesis (GO:0003337)	1/6	0.125232	0.365961	0	0	8.88818	18.466	SMO
heart trabecula formation (GO:0060347)	1/6	0.125232	0.365961	0	0	8.88818	18.466	HEY1
positive regulation of keratinocyte migration (GO:0051549)	1/6	0.125232	0.365961	0	0	8.88818	18.466	EPB41L4B
enteric nervous system development (GO:0048484)	1/6	0.125232	0.365961	0	0	8.88818	18.466	EDNRB
positive regulation of fever generation (GO:0031622)	1/6	0.125232	0.365961	0	0	8.88818	18.466	IL1B
response to catecholamine (GO:0071869)	1/6	0.125232	0.365961	0	0	8.88818	18.466	NR4A3
maintenance of protein location in extracellular region (GO:0071694)	1/6	0.125232	0.365961	0	0	8.88818	18.466	NBL1
venous blood vessel morphogenesis (GO:0048845)	1/6	0.125232	0.365961	0	0	8.88818	18.466	VEGFA
surfactant homeostasis (GO:0043129)	1/6	0.125232	0.365961	0	0	8.88818	18.466	VEGFA
positive regulation of intracellular estrogen receptor signaling pathway (GO:0033148)	1/6	0.125232	0.365961	0	0	8.88818	18.466	FOXA1
negative regulation of cell cycle phase transition (GO:1901988)	1/6	0.125232	0.365961	0	0	8.88818	18.466	RGCC
negative regulation of mononuclear cell migration (GO:0071676)	1/6	0.125232	0.365961	0	0	8.88818	18.466	NBL1
negative regulation of smooth muscle cell differentiation (GO:0051151)	1/6	0.125232	0.365961	0	0	8.88818	18.466	EREG
negative regulation of glial cell proliferation (GO:0060253)	1/6	0.125232	0.365961	0	0	8.88818	18.466	HES1
long term synaptic depression (GO:0060292)	1/6	0.125232	0.365961	0	0	8.88818	18.466	PLK2
negative regulation of interleukin-6 secretion (GO:1900165)	1/6	0.125232	0.365961	0	0	8.88818	18.466	ZC3H12A
regulation of interleukin-13 secretion (GO:2000665)	1/6	0.125232	0.365961	0	0	8.88818	18.466	TNFRSF21
amine metabolic process (GO:0009308)	1/6	0.125232	0.365961	0	0	8.88818	18.466	AOC3
positive regulation of fibroblast apoptotic process (GO:2000271)	1/6	0.125232	0.365961	0	0	8.88818	18.466	STK17A
phospholipase C-activating G-protein coupled acetylcholine receptor signaling pathway (GO:0007207)	1/6	0.125232	0.365961	0	0	8.88818	18.466	GNA15
neuron remodeling (GO:0016322)	1/6	0.125232	0.365961	0	0	8.88818	18.466	RND1
protein complex assembly (GO:0006461)	7/189	0.125535	0.365961	0	0	1.71721	3.5635	TLE3;DDIT3;ZC3H12A;TNFAIP3;EPPIN;CNIH2;FERMT2
positive regulation of protein transport (GO:0051222)	3/56	0.125986	0.365961	0	0	2.52081	5.22206	ACHE;IL1A;PLK3
regulation of vasculature development (GO:1901342)	2/28	0.126118	0.365961	0	0	3.42264	7.0867	HEY1;VASH2
negative regulation of intracellular steroid hormone receptor signaling pathway (GO:0033144)	2/28	0.126118	0.365961	0	0	3.42264	7.0867	PER1;CRY1
cellular response to hydrogen peroxide (GO:0070301)	2/28	0.126118	0.365961	0	0	3.42264	7.0867	PPIF;TNFAIP3
negative regulation of homeostatic process (GO:0032845)	2/28	0.126118	0.365961	0	0	3.42264	7.0867	TNFAIP3;HOXA5
negative regulation of response to DNA damage stimulus (GO:2001021)	2/28	0.126118	0.365961	0	0	3.42264	7.0867	SNAI1;ACKR3
negative regulation of JNK cascade (GO:0046329)	2/28	0.126118	0.365961	0	0	3.42264	7.0867	PER1;DUSP10
cardiac muscle cell action potential involved in contraction (GO:0086002)	2/28	0.126118	0.365961	0	0	3.42264	7.0867	SCN4B;CACNA1G
actin filament organization (GO:0007015)	5/120	0.12636	0.365961	0	0	1.93897	4.01099	MYBPC2;DPYSL3;TCAP;ERMN;RND1
regulation of cell differentiation (GO:0045595)	5/121	0.129581	0.365961	0	0	1.92216	3.92782	GCM1;HEY1;SPOCK2;SKIL;SMAD7
positive regulation of protein complex assembly (GO:0031334)	4/88	0.129783	0.365961	0	0	2.12215	4.3332	FOSL1;PMAIP1;SNX9;VEGFA
Wnt signaling pathway, planar cell polarity pathway (GO:0060071)	4/88	0.129783	0.365961	0	0	2.12215	4.3332	WNT11;SMURF1;FZD7;WNT5A
regulation of glycolytic process (GO:0006110)	3/57	0.130938	0.365961	0	0	2.474	5.02972	MLXIPL;PFKFB3;HIF1A
epidermal growth factor receptor signaling pathway (GO:0007173)	3/57	0.130938	0.365961	0	0	2.474	5.02972	PIK3CA;EREG;HBEGF
I-kappaB kinase/NF-kappaB signaling (GO:0007249)	3/57	0.130938	0.365961	0	0	2.474	5.02972	RIPK2;IRAK2;RELB
response to retinoic acid (GO:0032526)	3/57	0.130938	0.365961	0	0	2.474	5.02972	WNT11;FZD7;WNT5A
regulation of striated muscle contraction (GO:0006942)	2/29	0.133575	0.365961	0	0	3.29571	6.63456	DMD;SMAD7
lung development (GO:0030324)	2/29	0.133575	0.365961	0	0	3.29571	6.63456	WNT11;VEGFA
positive regulation of interleukin-1 secretion (GO:0050716)	2/29	0.133575	0.365961	0	0	3.29571	6.63456	RIPK2;WNT5A
negative regulation of lymphocyte proliferation (GO:0050672)	2/29	0.133575	0.365961	0	0	3.29571	6.63456	IL10;TNFRSF21
negative regulation of epithelial cell apoptotic process (GO:1904036)	2/29	0.133575	0.365961	0	0	3.29571	6.63456	SERPINE1;TNFAIP3
positive regulation of epidermal growth factor receptor signaling pathway (GO:0045742)	2/29	0.133575	0.365961	0	0	3.29571	6.63456	PLAUR;EREG
regulation of cellular biosynthetic process (GO:0031326)	2/29	0.133575	0.365961	0	0	3.29571	6.63456	PRG2;FGFR4
carbohydrate derivative biosynthetic process (GO:1901137)	2/29	0.133575	0.365961	0	0	3.29571	6.63456	B3GNT5;DDR2
regulation of establishment of planar polarity (GO:0090175)	4/89	0.13368	0.365961	0	0	2.09708	4.21996	WNT11;SMURF1;FZD7;WNT5A
receptor metabolic process (GO:0043112)	3/58	0.135957	0.365961	0	0	2.42889	4.84665	IL10;SMURF1;ACKR3
cell-matrix adhesion (GO:0007160)	4/90	0.137625	0.365961	0	0	2.07259	4.1104	ACTN2;LYPD3;MSLN;FERMT2
regulation of extrinsic apoptotic signaling pathway (GO:2001236)	3/59	0.141041	0.365961	0	0	2.3854	4.67228	TNFRSF12A;G0S2;THBS1
keratinocyte differentiation (GO:0030216)	3/59	0.141041	0.365961	0	0	2.3854	4.67228	JAG1;WNT5A;EREG
negative regulation of stress-activated MAPK cascade (GO:0032873)	2/30	0.141128	0.365961	0	0	3.17784	6.22248	PER1;DUSP10
regulation of defense response to virus by host (GO:0050691)	2/30	0.141128	0.365961	0	0	3.17784	6.22248	ZC3H12A;TNFAIP3
negative regulation of secretion by cell (GO:1903531)	2/30	0.141128	0.365961	0	0	3.17784	6.22248	LIF;OSM
activation of protein kinase B activity (GO:0032148)	2/30	0.141128	0.365961	0	0	3.17784	6.22248	WNT5A;ADRA2B
'de novo' posttranslational protein folding (GO:0051084)	2/30	0.141128	0.365961	0	0	3.17784	6.22248	HSPA2;HSPA13
cellular response to acid chemical (GO:0071229)	4/91	0.141616	0.365961	0	0	2.04866	4.00438	WNT11;FZD7;WNT5A;VEGFA
positive regulation of multicellular organism growth (GO:0040018)	1/7	0.144527	0.365961	0	0	7.40644	14.3262	GH1
skeletal muscle myosin thick filament assembly (GO:0030241)	1/7	0.144527	0.365961	0	0	7.40644	14.3262	TCAP
adherens junction assembly (GO:0034333)	1/7	0.144527	0.365961	0	0	7.40644	14.3262	SMAD7
positive regulation of insulin-like growth factor receptor signaling pathway (GO:0043568)	1/7	0.144527	0.365961	0	0	7.40644	14.3262	GH1
regulation of cyclic-nucleotide phosphodiesterase activity (GO:0051342)	1/7	0.144527	0.365961	0	0	7.40644	14.3262	GNAT1
cardiac atrium development (GO:0003230)	1/7	0.144527	0.365961	0	0	7.40644	14.3262	DLL4
smooth muscle cell migration (GO:0014909)	1/7	0.144527	0.365961	0	0	7.40644	14.3262	PLAT
positive regulation of epithelial cell proliferation involved in wound healing (GO:0060054)	1/7	0.144527	0.365961	0	0	7.40644	14.3262	FZD7
negative regulation of production of miRNAs involved in gene silencing by miRNA (GO:1903799)	1/7	0.144527	0.365961	0	0	7.40644	14.3262	ZC3H12A
regulation of hormone biosynthetic process (GO:0046885)	1/7	0.144527	0.365961	0	0	7.40644	14.3262	HIF1A
regulation of monocyte chemotactic protein-1 production (GO:0071637)	1/7	0.144527	0.365961	0	0	7.40644	14.3262	IL1B
brown fat cell differentiation (GO:0050873)	1/7	0.144527	0.365961	0	0	7.40644	14.3262	METRNL
regulation of endocytic recycling (GO:2001135)	1/7	0.144527	0.365961	0	0	7.40644	14.3262	ACTN2
fatty acid elongation, unsaturated fatty acid (GO:0019368)	1/7	0.144527	0.365961	0	0	7.40644	14.3262	ELOVL4
radial glial cell differentiation (GO:0060019)	1/7	0.144527	0.365961	0	0	7.40644	14.3262	HES1
regulation of mitochondrial membrane permeability involved in apoptotic process (GO:1902108)	1/7	0.144527	0.365961	0	0	7.40644	14.3262	CAMK2A
mitral valve development (GO:0003174)	1/7	0.144527	0.365961	0	0	7.40644	14.3262	SMAD6
positive regulation of mast cell degranulation (GO:0043306)	1/7	0.144527	0.365961	0	0	7.40644	14.3262	GAB2
positive regulation of epithelial cell differentiation involved in kidney development (GO:2000698)	1/7	0.144527	0.365961	0	0	7.40644	14.3262	LIF
regulation of endothelial cell chemotaxis to fibroblast growth factor (GO:2000544)	1/7	0.144527	0.365961	0	0	7.40644	14.3262	FGF18
pri-miRNA transcription from RNA polymerase II promoter (GO:0061614)	1/7	0.144527	0.365961	0	0	7.40644	14.3262	FOSL1
positive regulation of extracellular matrix disassembly (GO:0090091)	1/7	0.144527	0.365961	0	0	7.40644	14.3262	DDR2
cytoplasmic sequestering of NF-kappaB (GO:0007253)	1/7	0.144527	0.365961	0	0	7.40644	14.3262	IL10
leukocyte aggregation (GO:0070486)	1/7	0.144527	0.365961	0	0	7.40644	14.3262	IL1B
regulation of natural killer cell chemotaxis (GO:2000501)	1/7	0.144527	0.365961	0	0	7.40644	14.3262	CCL7
sequestering of extracellular ligand from receptor (GO:0035581)	1/7	0.144527	0.365961	0	0	7.40644	14.3262	NBL1
negative regulation of cardiac muscle cell differentiation (GO:2000726)	1/7	0.144527	0.365961	0	0	7.40644	14.3262	FZD7
positive regulation of autophagy of mitochondrion (GO:1903599)	1/7	0.144527	0.365961	0	0	7.40644	14.3262	HK2
cellular response to leptin stimulus (GO:0044320)	1/7	0.144527	0.365961	0	0	7.40644	14.3262	NR4A3
L-alanine transport (GO:0015808)	1/7	0.144527	0.365961	0	0	7.40644	14.3262	SLC38A3
central nervous system neuron axonogenesis (GO:0021955)	1/7	0.144527	0.365961	0	0	7.40644	14.3262	SPTBN4
regulation of chemokine biosynthetic process (GO:0045073)	1/7	0.144527	0.365961	0	0	7.40644	14.3262	WNT5A
gas homeostasis (GO:0033483)	1/7	0.144527	0.365961	0	0	7.40644	14.3262	HIF1A
regulation of T-helper 17 type immune response (GO:2000316)	1/7	0.144527	0.365961	0	0	7.40644	14.3262	SMAD7
positive regulation of cyclin-dependent protein serine/threonine kinase activity involved in G1/S transition of mitotic cell cycle (GO:0031659)	1/7	0.144527	0.365961	0	0	7.40644	14.3262	RGCC
regulation of isotype switching (GO:0045191)	1/7	0.144527	0.365961	0	0	7.40644	14.3262	IL10
negative regulation of calcium ion import (GO:0090281)	1/7	0.144527	0.365961	0	0	7.40644	14.3262	EPPIN
fatty acid elongation, saturated fatty acid (GO:0019367)	1/7	0.144527	0.365961	0	0	7.40644	14.3262	ELOVL4
regulation of interleukin-18 production (GO:0032661)	1/7	0.144527	0.365961	0	0	7.40644	14.3262	IL10
glycosphingolipid catabolic process (GO:0046479)	1/7	0.144527	0.365961	0	0	7.40644	14.3262	NEU4
fatty acid elongation, polyunsaturated fatty acid (GO:0034626)	1/7	0.144527	0.365961	0	0	7.40644	14.3262	ELOVL4
positive regulation of protein deubiquitination (GO:1903003)	1/7	0.144527	0.365961	0	0	7.40644	14.3262	ZC3H12A
negative regulation of cell adhesion mediated by integrin (GO:0033629)	1/7	0.144527	0.365961	0	0	7.40644	14.3262	SERPINE1
regulation of smooth muscle cell differentiation (GO:0051150)	1/7	0.144527	0.365961	0	0	7.40644	14.3262	EREG
chromatin-mediated maintenance of transcription (GO:0048096)	1/7	0.144527	0.365961	0	0	7.40644	14.3262	CHEK1
morphogenesis of a polarized epithelium (GO:0001738)	1/7	0.144527	0.365961	0	0	7.40644	14.3262	VANGL2
positive regulation of lymphocyte apoptotic process (GO:0070230)	1/7	0.144527	0.365961	0	0	7.40644	14.3262	IL10
vascular endothelial growth factor signaling pathway (GO:0038084)	1/7	0.144527	0.365961	0	0	7.40644	14.3262	VEGFA
positive regulation of macrophage migration (GO:1905523)	1/7	0.144527	0.365961	0	0	7.40644	14.3262	THBS1
regulation of histone H3-K9 acetylation (GO:2000615)	1/7	0.144527	0.365961	0	0	7.40644	14.3262	CHEK1
attachment of GPI anchor to protein (GO:0016255)	1/7	0.144527	0.365961	0	0	7.40644	14.3262	PLAUR
membrane fusion involved in viral entry into host cell (GO:0039663)	1/7	0.144527	0.365961	0	0	7.40644	14.3262	CXCR4
regulation of high voltage-gated calcium channel activity (GO:1901841)	1/7	0.144527	0.365961	0	0	7.40644	14.3262	PDE4B
regulation of vitamin D biosynthetic process (GO:0060556)	1/7	0.144527	0.365961	0	0	7.40644	14.3262	SNAI1
negative regulation of membrane protein ectodomain proteolysis (GO:0051045)	1/7	0.144527	0.365961	0	0	7.40644	14.3262	IL10
negative regulation of nitric oxide metabolic process (GO:1904406)	1/7	0.144527	0.365961	0	0	7.40644	14.3262	ZC3H12A
negative regulation of macrophage activation (GO:0043031)	1/7	0.144527	0.365961	0	0	7.40644	14.3262	ZC3H12A
negative regulation of cardiocyte differentiation (GO:1905208)	1/7	0.144527	0.365961	0	0	7.40644	14.3262	FZD7
positive regulation of hemopoiesis (GO:1903708)	1/7	0.144527	0.365961	0	0	7.40644	14.3262	HOXA5
negative regulation of T cell mediated immunity (GO:0002710)	1/7	0.144527	0.365961	0	0	7.40644	14.3262	SMAD7
pericardium morphogenesis (GO:0003344)	1/7	0.144527	0.365961	0	0	7.40644	14.3262	DLL4
positive regulation of neuroblast proliferation (GO:0002052)	1/7	0.144527	0.365961	0	0	7.40644	14.3262	VEGFA
negative regulation of B cell apoptotic process (GO:0002903)	1/7	0.144527	0.365961	0	0	7.40644	14.3262	IL2
regulation of toll-like receptor 3 signaling pathway (GO:0034139)	1/7	0.144527	0.365961	0	0	7.40644	14.3262	TNFAIP3
positive regulation of cell migration by vascular endothelial growth factor signaling pathway (GO:0038089)	1/7	0.144527	0.365961	0	0	7.40644	14.3262	VEGFA
negative regulation of transporter activity (GO:0032410)	1/7	0.144527	0.365961	0	0	7.40644	14.3262	PPIF
pharyngeal arch artery morphogenesis (GO:0061626)	1/7	0.144527	0.365961	0	0	7.40644	14.3262	HES1
fusion of virus membrane with host plasma membrane (GO:0019064)	1/7	0.144527	0.365961	0	0	7.40644	14.3262	CXCR4
vascular smooth muscle contraction (GO:0014829)	1/7	0.144527	0.365961	0	0	7.40644	14.3262	EDNRB
pentose metabolic process (GO:0019321)	1/7	0.144527	0.365961	0	0	7.40644	14.3262	PHACTR1
regulation of anion transport (GO:0044070)	1/7	0.144527	0.365961	0	0	7.40644	14.3262	STC1
forebrain neuron differentiation (GO:0021879)	1/7	0.144527	0.365961	0	0	7.40644	14.3262	INHBA
fatty acid elongation, monounsaturated fatty acid (GO:0034625)	1/7	0.144527	0.365961	0	0	7.40644	14.3262	ELOVL4
negative regulation of nitric oxide biosynthetic process (GO:0045019)	1/7	0.144527	0.365961	0	0	7.40644	14.3262	ZC3H12A
SA node cell action potential (GO:0086015)	1/7	0.144527	0.365961	0	0	7.40644	14.3262	CACNA1G
regulation of activation of Janus kinase activity (GO:0010533)	1/7	0.144527	0.365961	0	0	7.40644	14.3262	GH1
regulation of calcidiol 1-monooxygenase activity (GO:0060558)	1/7	0.144527	0.365961	0	0	7.40644	14.3262	IL1B
negative regulation of T cell cytokine production (GO:0002725)	1/7	0.144527	0.365961	0	0	7.40644	14.3262	SMAD7
regulation of protein deubiquitination (GO:0090085)	1/7	0.144527	0.365961	0	0	7.40644	14.3262	ZC3H12A
tooth mineralization (GO:0034505)	1/7	0.144527	0.365961	0	0	7.40644	14.3262	COL1A1
regulation of cell projection organization (GO:0031344)	1/7	0.144527	0.365961	0	0	7.40644	14.3262	ERMN
regulation of RNA polymerase II regulatory region sequence-specific DNA binding (GO:1903025)	1/7	0.144527	0.365961	0	0	7.40644	14.3262	DDIT3
positive regulation of macrophage chemotaxis (GO:0010759)	1/7	0.144527	0.365961	0	0	7.40644	14.3262	THBS1
positive regulation of type I interferon-mediated signaling pathway (GO:0060340)	1/7	0.144527	0.365961	0	0	7.40644	14.3262	WNT5A
positive regulation of myeloid cell apoptotic process (GO:0033034)	1/7	0.144527	0.365961	0	0	7.40644	14.3262	HCAR2
cleavage furrow formation (GO:0036089)	1/7	0.144527	0.365961	0	0	7.40644	14.3262	SNX9
negative regulation of cardiac muscle tissue development (GO:0055026)	1/7	0.144527	0.365961	0	0	7.40644	14.3262	FZD7
cellular response to cholesterol (GO:0071397)	1/7	0.144527	0.365961	0	0	7.40644	14.3262	SMO
negative regulation of heart rate (GO:0010459)	1/7	0.144527	0.365961	0	0	7.40644	14.3262	SPTBN4
membrane invagination (GO:0010324)	1/7	0.144527	0.365961	0	0	7.40644	14.3262	SMURF1
hyperosmotic response (GO:0006972)	1/7	0.144527	0.365961	0	0	7.40644	14.3262	ICOSLG
nucleosome assembly (GO:0006334)	3/60	0.146189	0.368507	0	0	2.34343	4.50608	HIST1H2BO;H2AFX;HIST1H2BB
positive regulation of protein binding (GO:0032092)	3/60	0.146189	0.368507	0	0	2.34343	4.50608	TRAF4;RIPK2;BAMBI
regulation of stress fiber assembly (GO:0051492)	3/60	0.146189	0.368507	0	0	2.34343	4.50608	WNT11;RGCC;MET
muscle organ development (GO:0007517)	3/60	0.146189	0.368507	0	0	2.34343	4.50608	ACHE;DMD;HBEGF
alpha-amino acid metabolic process (GO:1901605)	2/31	0.148771	0.373757	0	0	3.0681	5.84581	CKMT1A;CKB
negative regulation of extrinsic apoptotic signaling pathway via death domain receptors (GO:1902042)	2/31	0.148771	0.373757	0	0	3.0681	5.84581	SERPINE1;TNFAIP3
positive regulation of interleukin-1 beta production (GO:0032731)	2/31	0.148771	0.373757	0	0	3.0681	5.84581	RIPK2;WNT5A
regulation of cysteine-type endopeptidase activity involved in apoptotic process (GO:0043281)	4/93	0.149734	0.375756	0	0	2.00242	3.80238	PMAIP1;THBS1;NKX3-1;VEGFA
glycosaminoglycan metabolic process (GO:0030203)	3/61	0.151396	0.375762	0	0	2.30291	4.34755	GALNT5;SDC2;HAS1
regulation of tumor necrosis factor production (GO:0032680)	3/61	0.151396	0.375762	0	0	2.30291	4.34755	IL10;ZC3H12A;TNFAIP3
positive regulation of protein modification process (GO:0031401)	6/163	0.152104	0.375762	0	0	1.70455	3.20999	PPP1R16B;NTRK2;IL1B;PLAUR;NKX3-1;VEGFA
T cell receptor signaling pathway (GO:0050852)	6/163	0.152104	0.375762	0	0	1.70455	3.20999	PIK3CA;RIPK2;PDE4D;PDE4B;ICOSLG;TNFRSF21
phosphatidylcholine biosynthetic process (GO:0006656)	2/32	0.156494	0.375762	0	0	2.96568	5.50056	ACHE;CHKA
cyclic-nucleotide-mediated signaling (GO:0019935)	2/32	0.156494	0.375762	0	0	2.96568	5.50056	PDE4D;PDE2A
regulation of cell-cell adhesion (GO:0022407)	2/32	0.156494	0.375762	0	0	2.96568	5.50056	JAG1;SMAD7
positive regulation of T cell differentiation (GO:0045582)	2/32	0.156494	0.375762	0	0	2.96568	5.50056	DUSP10;TNFSF9
regulation of nitric oxide biosynthetic process (GO:0045428)	2/32	0.156494	0.375762	0	0	2.96568	5.50056	IL1B;ZC3H12A
positive regulation of myeloid leukocyte differentiation (GO:0002763)	2/32	0.156494	0.375762	0	0	2.96568	5.50056	DCSTAMP;LIF
synapse assembly (GO:0007416)	3/63	0.161984	0.375762	0	0	2.22591	4.05174	ACHE;SPOCK2;WNT5A
negative regulation of protein modification process (GO:0031400)	3/63	0.161984	0.375762	0	0	2.22591	4.05174	PPP1R16B;ZC3H12A;DMD
oligosaccharide metabolic process (GO:0009311)	3/63	0.161984	0.375762	0	0	2.22591	4.05174	NEU4;GALNT5;FUT3
carbohydrate homeostasis (GO:0033500)	3/63	0.161984	0.375762	0	0	2.22591	4.05174	MLXIPL;CRY1;FGFR4
positive regulation of cell projection organization (GO:0031346)	3/63	0.161984	0.375762	0	0	2.22591	4.05174	NTRK2;DPYSL3;WNT5A
protein insertion into mitochondrial membrane (GO:0051204)	1/8	0.163396	0.375762	0	0	6.34805	11.5	PMAIP1
positive regulation of macrophage differentiation (GO:0045651)	1/8	0.163396	0.375762	0	0	6.34805	11.5	LIF
neuron projection extension involved in neuron projection guidance (GO:1902284)	1/8	0.163396	0.375762	0	0	6.34805	11.5	SEMA3F
positive regulation of extracellular matrix assembly (GO:1901203)	1/8	0.163396	0.375762	0	0	6.34805	11.5	RGCC
regulation of brown fat cell differentiation (GO:0090335)	1/8	0.163396	0.375762	0	0	6.34805	11.5	METRNL
positive regulation of tissue remodeling (GO:0034105)	1/8	0.163396	0.375762	0	0	6.34805	11.5	IL2
regulation of fibroblast apoptotic process (GO:2000269)	1/8	0.163396	0.375762	0	0	6.34805	11.5	STK17A
mast cell activation involved in immune response (GO:0002279)	1/8	0.163396	0.375762	0	0	6.34805	11.5	NR4A3
stress-induced premature senescence (GO:0090400)	1/8	0.163396	0.375762	0	0	6.34805	11.5	CDKN1A
negative regulation of glial cell differentiation (GO:0045686)	1/8	0.163396	0.375762	0	0	6.34805	11.5	HES1
response to epinephrine (GO:0071871)	1/8	0.163396	0.375762	0	0	6.34805	11.5	PDE4B
integrin activation (GO:0033622)	1/8	0.163396	0.375762	0	0	6.34805	11.5	FERMT2
myelin maintenance (GO:0043217)	1/8	0.163396	0.375762	0	0	6.34805	11.5	CXCR4
cellular response to angiotensin (GO:1904385)	1/8	0.163396	0.375762	0	0	6.34805	11.5	CAMK2A
negative regulation of interleukin-1 production (GO:0032692)	1/8	0.163396	0.375762	0	0	6.34805	11.5	IL10
response to magnesium ion (GO:0032026)	1/8	0.163396	0.375762	0	0	6.34805	11.5	THBS1
aorta development (GO:0035904)	1/8	0.163396	0.375762	0	0	6.34805	11.5	JAG1
glomerular visceral epithelial cell development (GO:0072015)	1/8	0.163396	0.375762	0	0	6.34805	11.5	JAG1
negative regulation of anion transmembrane transport (GO:1903960)	1/8	0.163396	0.375762	0	0	6.34805	11.5	THBS1
negative regulation of toll-like receptor 4 signaling pathway (GO:0034144)	1/8	0.163396	0.375762	0	0	6.34805	11.5	TNFAIP3
positive regulation of behavior (GO:0048520)	1/8	0.163396	0.375762	0	0	6.34805	11.5	NR4A3
positive regulation of transforming growth factor beta production (GO:0071636)	1/8	0.163396	0.375762	0	0	6.34805	11.5	THBS1
negative regulation of potassium ion transmembrane transporter activity (GO:1901017)	1/8	0.163396	0.375762	0	0	6.34805	11.5	ACTN2
coronary vasculature morphogenesis (GO:0060977)	1/8	0.163396	0.375762	0	0	6.34805	11.5	VEGFA
regulation of protein deacetylation (GO:0090311)	1/8	0.163396	0.375762	0	0	6.34805	11.5	SPRED2
negative regulation of T-helper cell differentiation (GO:0045623)	1/8	0.163396	0.375762	0	0	6.34805	11.5	SMAD7
regulation of T cell mediated immunity (GO:0002709)	1/8	0.163396	0.375762	0	0	6.34805	11.5	IL1B
phagolysosome assembly (GO:0001845)	1/8	0.163396	0.375762	0	0	6.34805	11.5	RAB20
cellular response to UV-B (GO:0071493)	1/8	0.163396	0.375762	0	0	6.34805	11.5	CDKN1A
axon extension involved in axon guidance (GO:0048846)	1/8	0.163396	0.375762	0	0	6.34805	11.5	SEMA3F
excitatory synapse assembly (GO:1904861)	1/8	0.163396	0.375762	0	0	6.34805	11.5	WNT5A
glycerolipid biosynthetic process (GO:0045017)	1/8	0.163396	0.375762	0	0	6.34805	11.5	CPNE7
regulation of transcription from RNA polymerase II promoter in response to oxidative stress (GO:0043619)	1/8	0.163396	0.375762	0	0	6.34805	11.5	HIF1A
positive regulation of catenin import into nucleus (GO:0035413)	1/8	0.163396	0.375762	0	0	6.34805	11.5	BAMBI
glycosyl compound metabolic process (GO:1901657)	1/8	0.163396	0.375762	0	0	6.34805	11.5	NT5C1A
regulation of positive chemotaxis (GO:0050926)	1/8	0.163396	0.375762	0	0	6.34805	11.5	VEGFA
regulation of toll-like receptor 2 signaling pathway (GO:0034135)	1/8	0.163396	0.375762	0	0	6.34805	11.5	TNFAIP3
positive regulation of metanephros development (GO:0072216)	1/8	0.163396	0.375762	0	0	6.34805	11.5	LIF
positive regulation of tumor necrosis factor biosynthetic process (GO:0042535)	1/8	0.163396	0.375762	0	0	6.34805	11.5	THBS1
cellular response to epinephrine stimulus (GO:0071872)	1/8	0.163396	0.375762	0	0	6.34805	11.5	PDE4B
angiogenesis involved in wound healing (GO:0060055)	1/8	0.163396	0.375762	0	0	6.34805	11.5	MCAM
positive regulation of regulatory T cell differentiation (GO:0045591)	1/8	0.163396	0.375762	0	0	6.34805	11.5	DUSP10
positive regulation of monocyte differentiation (GO:0045657)	1/8	0.163396	0.375762	0	0	6.34805	11.5	DCSTAMP
exocrine system development (GO:0035272)	1/8	0.163396	0.375762	0	0	6.34805	11.5	NKX3-1
cardiac muscle hypertrophy (GO:0003300)	1/8	0.163396	0.375762	0	0	6.34805	11.5	TCAP
cGMP-mediated signaling (GO:0019934)	1/8	0.163396	0.375762	0	0	6.34805	11.5	PDE2A
ventricular trabecula myocardium morphogenesis (GO:0003222)	1/8	0.163396	0.375762	0	0	6.34805	11.5	DLL4
regulation of MHC class II biosynthetic process (GO:0045346)	1/8	0.163396	0.375762	0	0	6.34805	11.5	IL10
glomerular epithelial cell development (GO:0072310)	1/8	0.163396	0.375762	0	0	6.34805	11.5	JAG1
response to hydroperoxide (GO:0033194)	1/8	0.163396	0.375762	0	0	6.34805	11.5	GPX3
asymmetric protein localization (GO:0008105)	1/8	0.163396	0.375762	0	0	6.34805	11.5	VANGL2
mast cell degranulation (GO:0043303)	1/8	0.163396	0.375762	0	0	6.34805	11.5	NR4A3
negative regulation of bone remodeling (GO:0046851)	1/8	0.163396	0.375762	0	0	6.34805	11.5	TNFAIP3
negative regulation of vascular permeability (GO:0043116)	1/8	0.163396	0.375762	0	0	6.34805	11.5	PDE2A
regulation of dendritic cell antigen processing and presentation (GO:0002604)	1/8	0.163396	0.375762	0	0	6.34805	11.5	THBS1
osteoblast development (GO:0002076)	1/8	0.163396	0.375762	0	0	6.34805	11.5	ACHE
positive regulation of protein homodimerization activity (GO:0090073)	1/8	0.163396	0.375762	0	0	6.34805	11.5	TRAF4
phosphatidylinositol-3-phosphate biosynthetic process (GO:0036092)	1/8	0.163396	0.375762	0	0	6.34805	11.5	PIK3CA
aldehyde biosynthetic process (GO:0046184)	1/8	0.163396	0.375762	0	0	6.34805	11.5	DDR2
response to leptin (GO:0044321)	1/8	0.163396	0.375762	0	0	6.34805	11.5	NR4A3
regulation of keratinocyte migration (GO:0051547)	1/8	0.163396	0.375762	0	0	6.34805	11.5	EPB41L4B
response to vitamin D (GO:0033280)	1/8	0.163396	0.375762	0	0	6.34805	11.5	ALPL
positive regulation of cytokine-mediated signaling pathway (GO:0001961)	2/33	0.164291	0.375762	0	0	2.86987	5.18331	WNT5A;HIF1A
negative regulation of neurogenesis (GO:0050768)	2/33	0.164291	0.375762	0	0	2.86987	5.18331	ID1;ID3
oligosaccharide biosynthetic process (GO:0009312)	2/33	0.164291	0.375762	0	0	2.86987	5.18331	GALNT5;FUT3
entry into host cell (GO:0030260)	2/33	0.164291	0.375762	0	0	2.86987	5.18331	CXCR4;MET
negative regulation of mitochondrion organization (GO:0010823)	2/33	0.164291	0.375762	0	0	2.86987	5.18331	SIAH3;PPIF
cellular response to glucose starvation (GO:0042149)	2/33	0.164291	0.375762	0	0	2.86987	5.18331	ZC3H12A;PMAIP1
regulation of DNA recombination (GO:0000018)	2/33	0.164291	0.375762	0	0	2.86987	5.18331	IL10;CHEK1
positive regulation of nucleocytoplasmic transport (GO:0046824)	2/33	0.164291	0.375762	0	0	2.86987	5.18331	IL1B;ZC3H12A
positive regulation of Notch signaling pathway (GO:0045747)	2/33	0.164291	0.375762	0	0	2.86987	5.18331	DLL4;JAG1
positive regulation of locomotion (GO:0040017)	2/33	0.164291	0.375762	0	0	2.86987	5.18331	SPOCK2;THBS1
cellular response to organic substance (GO:0071310)	5/133	0.170979	0.381005	0	0	1.74088	3.07477	MLXIPL;IL1RL2;IL1B;DPYSL3;CXCR4
positive regulation of signal transduction (GO:0009967)	7/206	0.17128	0.381005	0	0	1.56914	2.76867	DLL4;GH1;JAG1;IL1B;HIF1A;VEGFA;NKX3-1
positive regulation of DNA binding (GO:0043388)	2/34	0.172155	0.381005	0	0	2.78004	4.89109	PLAUR;HES1
bone development (GO:0060348)	2/34	0.172155	0.381005	0	0	2.78004	4.89109	GH1;STC1
ventricular cardiac muscle tissue morphogenesis (GO:0055010)	2/34	0.172155	0.381005	0	0	2.78004	4.89109	DLL4;SMAD7
regulation of alcohol biosynthetic process (GO:1902930)	2/34	0.172155	0.381005	0	0	2.78004	4.89109	SEC14L2;SC5D
negative regulation of T cell activation (GO:0050868)	2/34	0.172155	0.381005	0	0	2.78004	4.89109	IL10;TNFRSF21
regulation of interferon-beta production (GO:0032648)	2/34	0.172155	0.381005	0	0	2.78004	4.89109	RIPK2;RELB
cellular macromolecular complex assembly (GO:0034622)	2/34	0.172155	0.381005	0	0	2.78004	4.89109	DMD;SNX9
glycolipid metabolic process (GO:0006664)	3/65	0.172787	0.381005	0	0	2.15389	3.78158	NEU4;B3GNT5;ARSI
chromatin assembly (GO:0031497)	3/65	0.172787	0.381005	0	0	2.15389	3.78158	HIST1H2BO;H2AFX;HIST1H2BB
regulation of myeloid cell differentiation (GO:0045637)	3/65	0.172787	0.381005	0	0	2.15389	3.78158	NR4A3;THBS1;HOXA5
negative regulation of blood vessel morphogenesis (GO:2000181)	3/65	0.172787	0.381005	0	0	2.15389	3.78158	RGCC;THBS1;HOXA5
negative regulation of apoptotic signaling pathway (GO:2001234)	3/65	0.172787	0.381005	0	0	2.15389	3.78158	PLAUR;PPIF;THBS1
peptidyl-serine modification (GO:0018209)	6/170	0.174062	0.381005	0	0	1.6312	2.8519	GALNT5;PNCK;PLK2;CAMK2A;CAMK1G;CAMKK1
adenylate cyclase-modulating G-protein coupled receptor signaling pathway (GO:0007188)	5/134	0.17464	0.381005	0	0	1.7273	3.01417	GNA15;RGS1;GNAT1;GPR84;ADRA2B
intracellular steroid hormone receptor signaling pathway (GO:0030518)	3/66	0.178263	0.381005	0	0	2.11959	3.65522	NRIP1;PMEPA1;NKX3-1
JNK cascade (GO:0007254)	3/66	0.178263	0.381005	0	0	2.11959	3.65522	RIPK2;IRAK2;WNT5A
lipid phosphorylation (GO:0046834)	2/35	0.180079	0.381005	0	0	2.69566	4.62132	PIK3CA;PI4K2A
regulation of heart rate by cardiac conduction (GO:0086091)	2/35	0.180079	0.381005	0	0	2.69566	4.62132	SCN4B;CACNA1G
positive regulation of peptide secretion (GO:0002793)	2/35	0.180079	0.381005	0	0	2.69566	4.62132	ACHE;IL1A
erythrocyte differentiation (GO:0030218)	2/35	0.180079	0.381005	0	0	2.69566	4.62132	INHBA;VEGFA
negative regulation of protein complex assembly (GO:0031333)	2/35	0.180079	0.381005	0	0	2.69566	4.62132	PMEPA1;SMAD6
carbohydrate catabolic process (GO:0016052)	2/35	0.180079	0.381005	0	0	2.69566	4.62132	NEU4;HK2
actin filament bundle organization (GO:0061572)	2/35	0.180079	0.381005	0	0	2.69566	4.62132	DPYSL3;RND1
negative regulation of circadian rhythm (GO:0042754)	1/9	0.181851	0.381005	0	0	5.55426	9.46762	CRY1
adult heart development (GO:0007512)	1/9	0.181851	0.381005	0	0	5.55426	9.46762	TCAP
alanine transport (GO:0032328)	1/9	0.181851	0.381005	0	0	5.55426	9.46762	SLC38A3
negative regulation of leukocyte chemotaxis (GO:0002689)	1/9	0.181851	0.381005	0	0	5.55426	9.46762	NBL1
negative regulation of cytokine production involved in inflammatory response (GO:1900016)	1/9	0.181851	0.381005	0	0	5.55426	9.46762	ZC3H12A
L-fucose metabolic process (GO:0042354)	1/9	0.181851	0.381005	0	0	5.55426	9.46762	FUT5
positive regulation of protein sumoylation (GO:0033235)	1/9	0.181851	0.381005	0	0	5.55426	9.46762	RASD2
ATF6-mediated unfolded protein response (GO:0036500)	1/9	0.181851	0.381005	0	0	5.55426	9.46762	DDIT3
regulation of interleukin-6 biosynthetic process (GO:0045408)	1/9	0.181851	0.381005	0	0	5.55426	9.46762	EREG
poly-N-acetyllactosamine biosynthetic process (GO:0030311)	1/9	0.181851	0.381005	0	0	5.55426	9.46762	B3GNT5
lactation (GO:0007595)	1/9	0.181851	0.381005	0	0	5.55426	9.46762	VEGFA
epithelial cell apoptotic process (GO:1904019)	1/9	0.181851	0.381005	0	0	5.55426	9.46762	IL10
neuronal ion channel clustering (GO:0045161)	1/9	0.181851	0.381005	0	0	5.55426	9.46762	SPTBN4
actin crosslink formation (GO:0051764)	1/9	0.181851	0.381005	0	0	5.55426	9.46762	DPYSL3
neuron maturation (GO:0042551)	1/9	0.181851	0.381005	0	0	5.55426	9.46762	RND1
cellular response to interleukin-4 (GO:0071353)	1/9	0.181851	0.381005	0	0	5.55426	9.46762	DCSTAMP
anoikis (GO:0043276)	1/9	0.181851	0.381005	0	0	5.55426	9.46762	PIK3CA
oligosaccharide catabolic process (GO:0009313)	1/9	0.181851	0.381005	0	0	5.55426	9.46762	NEU4
pericardium development (GO:0060039)	1/9	0.181851	0.381005	0	0	5.55426	9.46762	DLL4
negative regulation of catenin import into nucleus (GO:0035414)	1/9	0.181851	0.381005	0	0	5.55426	9.46762	DACT3
regulation of interferon-gamma secretion (GO:1902713)	1/9	0.181851	0.381005	0	0	5.55426	9.46762	ZC3H12A
regulation of mast cell activation (GO:0033003)	1/9	0.181851	0.381005	0	0	5.55426	9.46762	CRLF2
positive regulation of mitochondrial translation (GO:0070131)	1/9	0.181851	0.381005	0	0	5.55426	9.46762	MPV17L2
regulation of cysteine-type endopeptidase activity involved in apoptotic signaling pathway (GO:2001267)	1/9	0.181851	0.381005	0	0	5.55426	9.46762	PLAUR
positive regulation of nitric-oxide synthase biosynthetic process (GO:0051770)	1/9	0.181851	0.381005	0	0	5.55426	9.46762	NAMPT
neurotrophin TRK receptor signaling pathway (GO:0048011)	1/9	0.181851	0.381005	0	0	5.55426	9.46762	DDIT4
L-fucose catabolic process (GO:0042355)	1/9	0.181851	0.381005	0	0	5.55426	9.46762	FUT5
positive regulation of leukocyte apoptotic process (GO:2000108)	1/9	0.181851	0.381005	0	0	5.55426	9.46762	HCAR2
central nervous system neuron development (GO:0021954)	1/9	0.181851	0.381005	0	0	5.55426	9.46762	NTRK2
L-ascorbic acid metabolic process (GO:0019852)	1/9	0.181851	0.381005	0	0	5.55426	9.46762	SLC2A3
heterochromatin organization (GO:0070828)	1/9	0.181851	0.381005	0	0	5.55426	9.46762	SNAI1
positive regulation of T cell chemotaxis (GO:0010820)	1/9	0.181851	0.381005	0	0	5.55426	9.46762	WNT5A
response to muramyl dipeptide (GO:0032495)	1/9	0.181851	0.381005	0	0	5.55426	9.46762	RIPK2
positive regulation of astrocyte differentiation (GO:0048711)	1/9	0.181851	0.381005	0	0	5.55426	9.46762	HES1
sympathetic ganglion development (GO:0061549)	1/9	0.181851	0.381005	0	0	5.55426	9.46762	SEMA3F
positive regulation of epidermis development (GO:0045684)	1/9	0.181851	0.381005	0	0	5.55426	9.46762	FST
negative regulation of activin receptor signaling pathway (GO:0032926)	1/9	0.181851	0.381005	0	0	5.55426	9.46762	FST
negative regulation of heterotypic cell-cell adhesion (GO:0034115)	1/9	0.181851	0.381005	0	0	5.55426	9.46762	IL10
regulation of cell-cell adhesion involved in gastrulation (GO:0070587)	1/9	0.181851	0.381005	0	0	5.55426	9.46762	IL10
regulation of bile acid biosynthetic process (GO:0070857)	1/9	0.181851	0.381005	0	0	5.55426	9.46762	FGFR4
engulfment of apoptotic cell (GO:0043652)	1/9	0.181851	0.381005	0	0	5.55426	9.46762	THBS1
regulation of organ morphogenesis (GO:2000027)	1/9	0.181851	0.381005	0	0	5.55426	9.46762	SMO
negative regulation of lymphocyte apoptotic process (GO:0070229)	1/9	0.181851	0.381005	0	0	5.55426	9.46762	IL2
endothelial cell chemotaxis (GO:0035767)	1/9	0.181851	0.381005	0	0	5.55426	9.46762	VEGFA
positive regulation of myeloid leukocyte mediated immunity (GO:0002888)	1/9	0.181851	0.381005	0	0	5.55426	9.46762	GAB2
negative regulation of interferon-beta production (GO:0032688)	1/9	0.181851	0.381005	0	0	5.55426	9.46762	RELB
response to interleukin-4 (GO:0070670)	1/9	0.181851	0.381005	0	0	5.55426	9.46762	DCSTAMP
fucose catabolic process (GO:0019317)	1/9	0.181851	0.381005	0	0	5.55426	9.46762	FUT5
protein hexamerization (GO:0034214)	1/9	0.181851	0.381005	0	0	5.55426	9.46762	PANX2
regulation of hair cycle (GO:0042634)	1/9	0.181851	0.381005	0	0	5.55426	9.46762	PER1
B cell homeostasis (GO:0001782)	1/9	0.181851	0.381005	0	0	5.55426	9.46762	TNFAIP3
regulation of flagellated sperm motility (GO:1901317)	1/9	0.181851	0.381005	0	0	5.55426	9.46762	EPPIN
regulation of cell communication by electrical coupling involved in cardiac conduction (GO:1901844)	1/9	0.181851	0.381005	0	0	5.55426	9.46762	PDE4D
mitral valve morphogenesis (GO:0003183)	1/9	0.181851	0.381005	0	0	5.55426	9.46762	SMAD6
T cell mediated immunity (GO:0002456)	1/9	0.181851	0.381005	0	0	5.55426	9.46762	JAG1
mast cell mediated immunity (GO:0002448)	1/9	0.181851	0.381005	0	0	5.55426	9.46762	NR4A3
negative regulation of transcription by competitive promoter binding (GO:0010944)	1/9	0.181851	0.381005	0	0	5.55426	9.46762	SMAD7
negative regulation of potassium ion transmembrane transport (GO:1901380)	1/9	0.181851	0.381005	0	0	5.55426	9.46762	ACTN2
axonal transport of mitochondrion (GO:0019896)	1/9	0.181851	0.381005	0	0	5.55426	9.46762	HIF1A
fatty acid homeostasis (GO:0055089)	1/9	0.181851	0.381005	0	0	5.55426	9.46762	MLXIPL
cytoskeletal anchoring at plasma membrane (GO:0007016)	1/9	0.181851	0.381005	0	0	5.55426	9.46762	SPTBN4
serine family amino acid catabolic process (GO:0009071)	1/9	0.181851	0.381005	0	0	5.55426	9.46762	SDS
regulation of nephron tubule epithelial cell differentiation (GO:0072182)	1/9	0.181851	0.381005	0	0	5.55426	9.46762	LIF
Golgi inheritance (GO:0048313)	1/9	0.181851	0.381005	0	0	5.55426	9.46762	PLK3
response to vitamin (GO:0033273)	1/9	0.181851	0.381005	0	0	5.55426	9.46762	ALPL
epidermal cell differentiation (GO:0009913)	3/67	0.183787	0.382714	0	0	2.08637	3.53426	JAG1;WNT5A;EREG
positive regulation of synaptic transmission (GO:0050806)	3/67	0.183787	0.382714	0	0	2.08637	3.53426	MPP2;PLK2;SLC8A2
regulation of cyclin-dependent protein serine/threonine kinase activity (GO:0000079)	3/67	0.183787	0.382714	0	0	2.08637	3.53426	CDKN1A;SERTAD1;GADD45A
positive regulation of autophagy (GO:0010508)	3/67	0.183787	0.382714	0	0	2.08637	3.53426	PLK3;PLK2;ZC3H12A
cellular response to UV (GO:0034644)	3/67	0.183787	0.382714	0	0	2.08637	3.53426	CDKN1A;HIST3H2A;CHEK1
regulation of protein ubiquitination (GO:0031396)	4/101	0.18386	0.382714	0	0	1.83651	3.11029	RIPK2;CRY1;TNFAIP3;SMAD7
intrinsic apoptotic signaling pathway (GO:0097193)	4/101	0.18386	0.382714	0	0	1.83651	3.11029	CDKN1A;DDIT3;PMAIP1;HIC1
positive regulation of transferase activity (GO:0051347)	5/137	0.185801	0.386398	0	0	1.68778	2.84066	NTRK2;ROR1;FGFR4;MET;DDR2
carbohydrate biosynthetic process (GO:0016051)	2/36	0.188057	0.387046	0	0	2.61624	4.37176	GALNT5;FUT3
natural killer cell activation (GO:0030101)	2/36	0.188057	0.387046	0	0	2.61624	4.37176	ULBP2;IL2
sodium ion transmembrane transport (GO:0035725)	2/36	0.188057	0.387046	0	0	2.61624	4.37176	SCN4B;SLC8A2
regulation of filopodium assembly (GO:0051489)	2/36	0.188057	0.387046	0	0	2.61624	4.37176	PPP1R16B;DPYSL3
heart looping (GO:0001947)	2/36	0.188057	0.387046	0	0	2.61624	4.37176	VANGL2;SMO
cardiac muscle tissue morphogenesis (GO:0055008)	2/36	0.188057	0.387046	0	0	2.61624	4.37176	TCAP;SMAD7
negative regulation of cysteine-type endopeptidase activity involved in apoptotic process (GO:0043154)	3/68	0.189355	0.387046	0	0	2.05416	3.4184	PLAUR;THBS1;VEGFA
regulation of endopeptidase activity (GO:0052548)	3/68	0.189355	0.387046	0	0	2.05416	3.4184	SERPINB2;SPOCK2;SERPINE1
cellular response to DNA damage stimulus (GO:0006974)	10/329	0.192488	0.387046	0	0	1.39938	2.3058	PLK3;CDKN1A;GADD45A;DDIT3;CHEK1;ZC3H12A;H2AFX;SPDYA;CRY1;HIC1
positive regulation of neurogenesis (GO:0050769)	3/69	0.194966	0.387046	0	0	2.02293	3.30736	ADRA2B;NBL1;VEGFA
proteolysis (GO:0006508)	9/291	0.195156	0.387046	0	0	1.42413	2.32696	CELA2A;TINAGL1;PLAU;OLR1;PLAT;RHBDL3;AMZ1;RHBDL1;CNDP1
myelination (GO:0042552)	2/37	0.196083	0.387046	0	0	2.54136	4.14043	CXCR4;TNFRSF21
regulation of sodium ion transmembrane transporter activity (GO:2000649)	2/37	0.196083	0.387046	0	0	2.54136	4.14043	DMD;SCN4B
positive regulation of axonogenesis (GO:0050772)	2/37	0.196083	0.387046	0	0	2.54136	4.14043	NTRK2;SEMA7A
positive regulation of stress fiber assembly (GO:0051496)	2/37	0.196083	0.387046	0	0	2.54136	4.14043	WNT11;RGCC
negative regulation of Ras protein signal transduction (GO:0046580)	2/37	0.196083	0.387046	0	0	2.54136	4.14043	SPRY1;MET
actin filament bundle assembly (GO:0051017)	2/37	0.196083	0.387046	0	0	2.54136	4.14043	DPYSL3;RND1
regulation of metal ion transport (GO:0010959)	2/37	0.196083	0.387046	0	0	2.54136	4.14043	SPTBN4;PER1
response to steroid hormone (GO:0048545)	2/37	0.196083	0.387046	0	0	2.54136	4.14043	THBS1;NKX3-1
induction of positive chemotaxis (GO:0050930)	1/10	0.199899	0.387046	0	0	4.93687	7.94807	VEGFA
regulation of response to stress (GO:0080134)	1/10	0.199899	0.387046	0	0	4.93687	7.94807	IL10
glomerular filtration (GO:0003094)	1/10	0.199899	0.387046	0	0	4.93687	7.94807	MCAM
adrenal gland development (GO:0030325)	1/10	0.199899	0.387046	0	0	4.93687	7.94807	WNT11
ganglion development (GO:0061548)	1/10	0.199899	0.387046	0	0	4.93687	7.94807	SEMA3F
endothelium development (GO:0003158)	1/10	0.199899	0.387046	0	0	4.93687	7.94807	JAG1
dorsal/ventral axis specification (GO:0009950)	1/10	0.199899	0.387046	0	0	4.93687	7.94807	SMAD6
positive regulation of calcium ion import (GO:0090280)	1/10	0.199899	0.387046	0	0	4.93687	7.94807	STC1
cellular response to growth hormone stimulus (GO:0071378)	1/10	0.199899	0.387046	0	0	4.93687	7.94807	GH1
3'-UTR-mediated mRNA destabilization (GO:0061158)	1/10	0.199899	0.387046	0	0	4.93687	7.94807	ZC3H12A
macrophage chemotaxis (GO:0048246)	1/10	0.199899	0.387046	0	0	4.93687	7.94807	EDNRB
protein K11-linked deubiquitination (GO:0035871)	1/10	0.199899	0.387046	0	0	4.93687	7.94807	TNFAIP3
phosphatidylglycerol biosynthetic process (GO:0006655)	1/10	0.199899	0.387046	0	0	4.93687	7.94807	CDS1
positive regulation of alcohol biosynthetic process (GO:1902932)	1/10	0.199899	0.387046	0	0	4.93687	7.94807	IL1B
skeletal muscle thin filament assembly (GO:0030240)	1/10	0.199899	0.387046	0	0	4.93687	7.94807	TCAP
contractile actin filament bundle assembly (GO:0030038)	1/10	0.199899	0.387046	0	0	4.93687	7.94807	PHACTR1
mesoderm morphogenesis (GO:0048332)	1/10	0.199899	0.387046	0	0	4.93687	7.94807	SNAI1
detection of light stimulus involved in sensory perception (GO:0050962)	1/10	0.199899	0.387046	0	0	4.93687	7.94807	GNAT1
positive regulation of bone remodeling (GO:0046852)	1/10	0.199899	0.387046	0	0	4.93687	7.94807	DCSTAMP
muscle cell migration (GO:0014812)	1/10	0.199899	0.387046	0	0	4.93687	7.94807	PLAT
mesenchymal to epithelial transition (GO:0060231)	1/10	0.199899	0.387046	0	0	4.93687	7.94807	FZD7
negative regulation of inclusion body assembly (GO:0090084)	1/10	0.199899	0.387046	0	0	4.93687	7.94807	HSPA2
RNA phosphodiester bond hydrolysis, endonucleolytic (GO:0090502)	1/10	0.199899	0.387046	0	0	4.93687	7.94807	ZC3H12A
neuroepithelial cell differentiation (GO:0060563)	1/10	0.199899	0.387046	0	0	4.93687	7.94807	WNT11
regulation of DNA-templated transcription, initiation (GO:2000142)	1/10	0.199899	0.387046	0	0	4.93687	7.94807	FOSL1
regulation of transforming growth factor beta production (GO:0071634)	1/10	0.199899	0.387046	0	0	4.93687	7.94807	HIF1A
positive regulation of intracellular steroid hormone receptor signaling pathway (GO:0033145)	1/10	0.199899	0.387046	0	0	4.93687	7.94807	FOXA1
negative regulation of gene silencing by miRNA (GO:0060965)	1/10	0.199899	0.387046	0	0	4.93687	7.94807	ZC3H12A
T cell chemotaxis (GO:0010818)	1/10	0.199899	0.387046	0	0	4.93687	7.94807	CXCL16
glycoprotein catabolic process (GO:0006516)	1/10	0.199899	0.387046	0	0	4.93687	7.94807	NEU4
negative regulation of reproductive process (GO:2000242)	1/10	0.199899	0.387046	0	0	4.93687	7.94807	NKX3-1
negative regulation of cell activation (GO:0050866)	1/10	0.199899	0.387046	0	0	4.93687	7.94807	THBD
macrophage migration (GO:1905517)	1/10	0.199899	0.387046	0	0	4.93687	7.94807	EDNRB
negative regulation of interleukin-1 beta secretion (GO:0050713)	1/10	0.199899	0.387046	0	0	4.93687	7.94807	ZC3H12A
regulation of histone phosphorylation (GO:0033127)	1/10	0.199899	0.387046	0	0	4.93687	7.94807	IL1B
Rap protein signal transduction (GO:0032486)	1/10	0.199899	0.387046	0	0	4.93687	7.94807	PLK2
nucleoside metabolic process (GO:0009116)	1/10	0.199899	0.387046	0	0	4.93687	7.94807	NT5C1A
central nervous system projection neuron axonogenesis (GO:0021952)	1/10	0.199899	0.387046	0	0	4.93687	7.94807	SPTBN4
positive regulation of reproductive process (GO:2000243)	1/10	0.199899	0.387046	0	0	4.93687	7.94807	INHBA
myeloid dendritic cell differentiation (GO:0043011)	1/10	0.199899	0.387046	0	0	4.93687	7.94807	DCSTAMP
cardiovascular system development (GO:0072358)	1/10	0.199899	0.387046	0	0	4.93687	7.94807	PIK3CA
ectoderm development (GO:0007398)	1/10	0.199899	0.387046	0	0	4.93687	7.94807	SMURF1
regulation of DNA damage checkpoint (GO:2000001)	1/10	0.199899	0.387046	0	0	4.93687	7.94807	CRY1
protein localization to mitochondrion (GO:0070585)	1/10	0.199899	0.387046	0	0	4.93687	7.94807	HK2
positive regulation of bone resorption (GO:0045780)	1/10	0.199899	0.387046	0	0	4.93687	7.94807	DCSTAMP
negative regulation by host of viral process (GO:0044793)	1/10	0.199899	0.387046	0	0	4.93687	7.94807	ZC3H12A
ceramide catabolic process (GO:0046514)	1/10	0.199899	0.387046	0	0	4.93687	7.94807	NEU4
detection of light stimulus involved in visual perception (GO:0050908)	1/10	0.199899	0.387046	0	0	4.93687	7.94807	GNAT1
stress fiber assembly (GO:0043149)	1/10	0.199899	0.387046	0	0	4.93687	7.94807	PHACTR1
regulation of astrocyte differentiation (GO:0048710)	1/10	0.199899	0.387046	0	0	4.93687	7.94807	HES1
mitotic G1/S transition checkpoint (GO:0044819)	1/10	0.199899	0.387046	0	0	4.93687	7.94807	PLK3
positive regulation of lipid localization (GO:1905954)	1/10	0.199899	0.387046	0	0	4.93687	7.94807	ZC3H12A
poly-N-acetyllactosamine metabolic process (GO:0030309)	1/10	0.199899	0.387046	0	0	4.93687	7.94807	B3GNT5
regulation of immunoglobulin production (GO:0002637)	1/10	0.199899	0.387046	0	0	4.93687	7.94807	IL10
T cell homeostasis (GO:0043029)	1/10	0.199899	0.387046	0	0	4.93687	7.94807	PMAIP1
positive regulation of execution phase of apoptosis (GO:1900119)	1/10	0.199899	0.387046	0	0	4.93687	7.94807	ZC3H12A
Wnt signaling pathway involved in midbrain dopaminergic neuron differentiation (GO:1904953)	1/10	0.199899	0.387046	0	0	4.93687	7.94807	WNT5A
regulation of neuroblast proliferation (GO:1902692)	1/10	0.199899	0.387046	0	0	4.93687	7.94807	VEGFA
positive regulation of adaptive immune response based on somatic recombination of immune receptors built from immunoglobulin superfamily domains (GO:0002824)	1/10	0.199899	0.387046	0	0	4.93687	7.94807	IL1B
negative regulation of glucose transport (GO:0010829)	1/10	0.199899	0.387046	0	0	4.93687	7.94807	IL1B
regulation of T cell chemotaxis (GO:0010819)	1/10	0.199899	0.387046	0	0	4.93687	7.94807	WNT5A
vascular endothelial growth factor receptor signaling pathway (GO:0048010)	3/70	0.200617	0.387435	0	0	1.99264	3.20089	PIK3CA;SHB;VEGFA
Rab protein signal transduction (GO:0032482)	3/70	0.200617	0.387435	0	0	1.99264	3.20089	RAB30;RAB20;RAB33A
calcium-mediated signaling (GO:0019722)	3/70	0.200617	0.387435	0	0	1.99264	3.20089	EDNRB;CCL20;CXCR4
T cell differentiation (GO:0030217)	2/38	0.20415	0.392905	0	0	2.47064	3.92561	DLL4;IL2
membrane depolarization during action potential (GO:0086010)	2/38	0.20415	0.392905	0	0	2.47064	3.92561	SCN4B;CACNA1G
DNA damage checkpoint (GO:0000077)	2/38	0.20415	0.392905	0	0	2.47064	3.92561	CHEK1;H2AFX
positive regulation of innate immune response (GO:0045089)	2/38	0.20415	0.392905	0	0	2.47064	3.92561	WNT5A;EREG
positive regulation of growth (GO:0045927)	3/71	0.206307	0.396717	0	0	1.96324	3.09875	GH1;IL2;CXCL16
negative regulation of response to external stimulus (GO:0032102)	4/107	0.210958	0.397897	0	0	1.729	2.69049	IL10;SERPINE1;TNFAIP3;METRNL
regulation of protein secretion (GO:0050708)	4/107	0.210958	0.397897	0	0	1.729	2.69049	ACHE;IL1A;IL1B;STX1A
response to metal ion (GO:0010038)	3/72	0.212033	0.397897	0	0	1.93468	3.00072	IL1A;THBS1;HIF1A
regulation of type I interferon-mediated signaling pathway (GO:0060338)	2/39	0.212252	0.397897	0	0	2.40374	3.72575	WNT5A;DCST1
positive regulation of fat cell differentiation (GO:0045600)	2/39	0.212252	0.397897	0	0	2.40374	3.72575	ZC3H12A;METRNL
inositol lipid-mediated signaling (GO:0048017)	2/39	0.212252	0.397897	0	0	2.40374	3.72575	PIK3CA;GAB2
regulation of RNA metabolic process (GO:0051252)	2/39	0.212252	0.397897	0	0	2.40374	3.72575	RBM38;OASL
peptidyl-serine phosphorylation (GO:0018105)	5/145	0.216748	0.397897	0	0	1.59068	2.43218	PNCK;PLK2;CAMK2A;CAMK1G;CAMKK1
negative regulation of leukocyte activation (GO:0002695)	1/11	0.21755	0.397897	0	0	4.44295	6.77695	ZC3H12A
regulation of tumor necrosis factor biosynthetic process (GO:0042534)	1/11	0.21755	0.397897	0	0	4.44295	6.77695	THBS1
negative regulation of blood vessel diameter (GO:0097756)	1/11	0.21755	0.397897	0	0	4.44295	6.77695	EDNRB
postsynapse assembly (GO:0099068)	1/11	0.21755	0.397897	0	0	4.44295	6.77695	WNT5A
regulation of feeding behavior (GO:0060259)	1/11	0.21755	0.397897	0	0	4.44295	6.77695	NR4A3
regulation of lipid kinase activity (GO:0043550)	1/11	0.21755	0.397897	0	0	4.44295	6.77695	EEF1A2
morphogenesis of an epithelial sheet (GO:0002011)	1/11	0.21755	0.397897	0	0	4.44295	6.77695	DLL4
mononuclear cell differentiation (GO:1903131)	1/11	0.21755	0.397897	0	0	4.44295	6.77695	VEGFA
regulation of inclusion body assembly (GO:0090083)	1/11	0.21755	0.397897	0	0	4.44295	6.77695	HSPA2
interleukin-2-mediated signaling pathway (GO:0038110)	1/11	0.21755	0.397897	0	0	4.44295	6.77695	IL2
negative regulation of nuclear division (GO:0051784)	1/11	0.21755	0.397897	0	0	4.44295	6.77695	CHEK1
UV-damage excision repair (GO:0070914)	1/11	0.21755	0.397897	0	0	4.44295	6.77695	HIST3H2A
negative regulation of JUN kinase activity (GO:0043508)	1/11	0.21755	0.397897	0	0	4.44295	6.77695	DUSP10
positive regulation of leukocyte degranulation (GO:0043302)	1/11	0.21755	0.397897	0	0	4.44295	6.77695	GAB2
pyrimidine nucleoside catabolic process (GO:0046135)	1/11	0.21755	0.397897	0	0	4.44295	6.77695	NT5C1A
cellular response to sterol (GO:0036315)	1/11	0.21755	0.397897	0	0	4.44295	6.77695	SMO
cell-substrate junction assembly (GO:0007044)	1/11	0.21755	0.397897	0	0	4.44295	6.77695	LAMB3
positive regulation of tumor necrosis factor secretion (GO:1904469)	1/11	0.21755	0.397897	0	0	4.44295	6.77695	WNT5A
myosin filament assembly (GO:0031034)	1/11	0.21755	0.397897	0	0	4.44295	6.77695	MYBPC2
regulation of mitotic centrosome separation (GO:0046602)	1/11	0.21755	0.397897	0	0	4.44295	6.77695	CHEK1
positive regulation of histone deacetylation (GO:0031065)	1/11	0.21755	0.397897	0	0	4.44295	6.77695	VEGFA
somite development (GO:0061053)	1/11	0.21755	0.397897	0	0	4.44295	6.77695	SMO
lymphocyte mediated immunity (GO:0002449)	1/11	0.21755	0.397897	0	0	4.44295	6.77695	JAG1
response to axon injury (GO:0048678)	1/11	0.21755	0.397897	0	0	4.44295	6.77695	DPYSL3
monocyte differentiation (GO:0030224)	1/11	0.21755	0.397897	0	0	4.44295	6.77695	VEGFA
positive regulation of mesenchymal cell proliferation (GO:0002053)	1/11	0.21755	0.397897	0	0	4.44295	6.77695	VEGFA
renal filtration (GO:0097205)	1/11	0.21755	0.397897	0	0	4.44295	6.77695	MCAM
positive regulation of actin filament depolymerization (GO:0030836)	1/11	0.21755	0.397897	0	0	4.44295	6.77695	ACTN2
regulation of short-term neuronal synaptic plasticity (GO:0048172)	1/11	0.21755	0.397897	0	0	4.44295	6.77695	SLC8A2
negative regulation of protein localization to cell surface (GO:2000009)	1/11	0.21755	0.397897	0	0	4.44295	6.77695	ACTN2
cellular response to interleukin-2 (GO:0071352)	1/11	0.21755	0.397897	0	0	4.44295	6.77695	IL2
rhodopsin mediated signaling pathway (GO:0016056)	1/11	0.21755	0.397897	0	0	4.44295	6.77695	GNAT1
macrophage differentiation (GO:0030225)	1/11	0.21755	0.397897	0	0	4.44295	6.77695	VEGFA
positive regulation of fatty acid biosynthetic process (GO:0045723)	1/11	0.21755	0.397897	0	0	4.44295	6.77695	MLXIPL
negative regulation of potassium ion transport (GO:0043267)	1/11	0.21755	0.397897	0	0	4.44295	6.77695	ACTN2
phosphate ion homeostasis (GO:0055062)	1/11	0.21755	0.397897	0	0	4.44295	6.77695	FGFR4
camera-type eye morphogenesis (GO:0048593)	1/11	0.21755	0.397897	0	0	4.44295	6.77695	VEGFA
photoreceptor cell development (GO:0042461)	1/11	0.21755	0.397897	0	0	4.44295	6.77695	VEGFA
regulation of synaptic vesicle cycle (GO:0098693)	1/11	0.21755	0.397897	0	0	4.44295	6.77695	SYN1
modulation by host of viral genome replication (GO:0044827)	1/11	0.21755	0.397897	0	0	4.44295	6.77695	ZC3H12A
negative regulation of chemotaxis (GO:0050922)	1/11	0.21755	0.397897	0	0	4.44295	6.77695	THBS1
positive regulation of fatty acid oxidation (GO:0046321)	1/11	0.21755	0.397897	0	0	4.44295	6.77695	NR4A3
cyclooxygenase pathway (GO:0019371)	1/11	0.21755	0.397897	0	0	4.44295	6.77695	PTGES
magnesium ion transport (GO:0015693)	1/11	0.21755	0.397897	0	0	4.44295	6.77695	TUSC3
positive regulation of sodium ion transmembrane transporter activity (GO:2000651)	1/11	0.21755	0.397897	0	0	4.44295	6.77695	DMD
positive regulation of glucose metabolic process (GO:0010907)	1/11	0.21755	0.397897	0	0	4.44295	6.77695	PMAIP1
L-serine metabolic process (GO:0006563)	1/11	0.21755	0.397897	0	0	4.44295	6.77695	SDS
regulation of cardiac muscle cell differentiation (GO:2000725)	1/11	0.21755	0.397897	0	0	4.44295	6.77695	FZD7
hemidesmosome assembly (GO:0031581)	1/11	0.21755	0.397897	0	0	4.44295	6.77695	LAMB3
carbohydrate derivative catabolic process (GO:1901136)	1/11	0.21755	0.397897	0	0	4.44295	6.77695	NEU4
midbrain dopaminergic neuron differentiation (GO:1904948)	1/11	0.21755	0.397897	0	0	4.44295	6.77695	WNT5A
response to corticosteroid (GO:0031960)	1/11	0.21755	0.397897	0	0	4.44295	6.77695	IL10
regulation of cell motility (GO:2000145)	4/109	0.220231	0.400798	0	0	1.69589	2.56601	SPOCK2;EREG;RND1;HBEGF
regulation of cellular localization (GO:0060341)	2/40	0.220386	0.400798	0	0	2.34037	3.53952	CAMK2A;SYN1
negative regulation of epidermal growth factor receptor signaling pathway (GO:0042059)	2/40	0.220386	0.400798	0	0	2.34037	3.53952	GPRC5A;SPRY1
negative regulation of catabolic process (GO:0009895)	2/40	0.220386	0.400798	0	0	2.34037	3.53952	HCAR2;IL1B
regulation of cholesterol biosynthetic process (GO:0045540)	2/40	0.220386	0.400798	0	0	2.34037	3.53952	SEC14L2;SC5D
determination of heart left/right asymmetry (GO:0061371)	2/40	0.220386	0.400798	0	0	2.34037	3.53952	VANGL2;SMO
JAK-STAT cascade (GO:0007259)	2/40	0.220386	0.400798	0	0	2.34037	3.53952	GH1;HES1
regulation of G-protein coupled receptor protein signaling pathway (GO:0008277)	3/74	0.223586	0.40613	0	0	1.87999	2.81615	RGS16;CRY1;GNAT1
regulation of intracellular signal transduction (GO:1902531)	12/422	0.223679	0.40613	0	0	1.30643	1.95644	PPP1R16B;RASD2;PLK3;ARHGAP8;ARHGAP40;GDF15;IL1B;DDIT4;CHEK1;WNT5A;INHBA;IER3
odontogenesis (GO:0042476)	2/41	0.228544	0.411701	0	0	2.28024	3.3657	COL1A1;INHBA
regulation of cholesterol metabolic process (GO:0090181)	2/41	0.228544	0.411701	0	0	2.28024	3.3657	SEC14L2;SC5D
regulation of calcium-mediated signaling (GO:0050848)	2/41	0.228544	0.411701	0	0	2.28024	3.3657	PDE4D;DMD
positive regulation of cell division (GO:0051781)	2/41	0.228544	0.411701	0	0	2.28024	3.3657	CXCR5;NKX3-1
positive regulation of receptor-mediated endocytosis (GO:0048260)	2/41	0.228544	0.411701	0	0	2.28024	3.3657	SERPINE1;VEGFA
regulation of cellular metabolic process (GO:0031323)	2/41	0.228544	0.411701	0	0	2.28024	3.3657	STK17A;CNDP1
regulated exocytosis (GO:0045055)	5/148	0.228749	0.411701	0	0	1.55707	2.29688	ACTN2;SERPINE1;SYNGR3;THBS1;VEGFA
retinoid metabolic process (GO:0001523)	3/75	0.229408	0.411701	0	0	1.85379	2.72924	ALDH1A2;SDC2;DHRS3
regulation of defense response (GO:0031347)	3/75	0.229408	0.411701	0	0	1.85379	2.72924	SEMA7A;WNT5A;TNFAIP3
cardiac right ventricle morphogenesis (GO:0003215)	1/12	0.234813	0.411701	0	0	4.03884	5.85215	JAG1
regulation of vasculogenesis (GO:2001212)	1/12	0.234813	0.411701	0	0	4.03884	5.85215	HEY1
regulation of nitric-oxide synthase biosynthetic process (GO:0051769)	1/12	0.234813	0.411701	0	0	4.03884	5.85215	NAMPT
signal transduction involved in G2 DNA damage checkpoint (GO:0072425)	1/12	0.234813	0.411701	0	0	4.03884	5.85215	CHEK1
negative regulation of ATPase activity (GO:0032780)	1/12	0.234813	0.411701	0	0	4.03884	5.85215	PPIF
fatty acid elongation (GO:0030497)	1/12	0.234813	0.411701	0	0	4.03884	5.85215	ELOVL4
skeletal myofibril assembly (GO:0014866)	1/12	0.234813	0.411701	0	0	4.03884	5.85215	TCAP
retinol metabolic process (GO:0042572)	1/12	0.234813	0.411701	0	0	4.03884	5.85215	DHRS3
negative regulation of metabolic process (GO:0009892)	1/12	0.234813	0.411701	0	0	4.03884	5.85215	IL1B
negative regulation of oxidoreductase activity (GO:0051354)	1/12	0.234813	0.411701	0	0	4.03884	5.85215	AOC3
mitochondrial outer membrane permeabilization (GO:0097345)	1/12	0.234813	0.411701	0	0	4.03884	5.85215	PMAIP1
entry of bacterium into host cell (GO:0035635)	1/12	0.234813	0.411701	0	0	4.03884	5.85215	MET
mitochondrion transport along microtubule (GO:0047497)	1/12	0.234813	0.411701	0	0	4.03884	5.85215	HIF1A
regulation of cholesterol homeostasis (GO:2000188)	1/12	0.234813	0.411701	0	0	4.03884	5.85215	FGFR4
nucleoside catabolic process (GO:0009164)	1/12	0.234813	0.411701	0	0	4.03884	5.85215	NT5C1A
positive regulation of potassium ion transmembrane transporter activity (GO:1901018)	1/12	0.234813	0.411701	0	0	4.03884	5.85215	ACTN2
regulation of cell communication by electrical coupling (GO:0010649)	1/12	0.234813	0.411701	0	0	4.03884	5.85215	PDE4D
phasic smooth muscle contraction (GO:0014821)	1/12	0.234813	0.411701	0	0	4.03884	5.85215	EDNRB
eye photoreceptor cell development (GO:0042462)	1/12	0.234813	0.411701	0	0	4.03884	5.85215	VEGFA
histone H3 deacetylation (GO:0070932)	1/12	0.234813	0.411701	0	0	4.03884	5.85215	PER1
regulation of establishment of endothelial barrier (GO:1903140)	1/12	0.234813	0.411701	0	0	4.03884	5.85215	IL1B
vasoconstriction (GO:0042310)	1/12	0.234813	0.411701	0	0	4.03884	5.85215	EDNRB
activation of cysteine-type endopeptidase activity (GO:0097202)	1/12	0.234813	0.411701	0	0	4.03884	5.85215	RIPK2
regulation of mononuclear cell migration (GO:0071675)	1/12	0.234813	0.411701	0	0	4.03884	5.85215	THBS1
negative regulation of vascular smooth muscle cell proliferation (GO:1904706)	1/12	0.234813	0.411701	0	0	4.03884	5.85215	IL10
regulation of protein import into nucleus, translocation (GO:0033158)	1/12	0.234813	0.411701	0	0	4.03884	5.85215	PDE2A
negative regulation of interleukin-1 secretion (GO:0050711)	1/12	0.234813	0.411701	0	0	4.03884	5.85215	ZC3H12A
negative regulation of DNA damage response, signal transduction by p53 class mediator (GO:0043518)	1/12	0.234813	0.411701	0	0	4.03884	5.85215	SNAI1
cellular response to fatty acid (GO:0071398)	1/12	0.234813	0.411701	0	0	4.03884	5.85215	ZC3H12A
prostanoid metabolic process (GO:0006692)	1/12	0.234813	0.411701	0	0	4.03884	5.85215	PTGES
plasma membrane tubulation (GO:0097320)	1/12	0.234813	0.411701	0	0	4.03884	5.85215	SNX9
positive regulation of mRNA metabolic process (GO:1903313)	1/12	0.234813	0.411701	0	0	4.03884	5.85215	ZC3H12A
keratan sulfate catabolic process (GO:0042340)	1/12	0.234813	0.411701	0	0	4.03884	5.85215	FMOD
positive regulation of granulocyte macrophage colony-stimulating factor production (GO:0032725)	1/12	0.234813	0.411701	0	0	4.03884	5.85215	IL1B
eye photoreceptor cell differentiation (GO:0001754)	1/12	0.234813	0.411701	0	0	4.03884	5.85215	VEGFA
regulation of protein modification process (GO:0031399)	2/42	0.236722	0.412793	0	0	2.22312	3.20323	PPP1R16B;SPRED2
cellular response to radiation (GO:0071478)	2/42	0.236722	0.412793	0	0	2.22312	3.20323	CDKN1A;GADD45A
positive regulation of protein localization to nucleus (GO:1900182)	2/42	0.236722	0.412793	0	0	2.22312	3.20323	ZC3H12A;LIF
negative regulation of protein secretion (GO:0050709)	2/42	0.236722	0.412793	0	0	2.22312	3.20323	RGCC;IL1B
glycolipid biosynthetic process (GO:0009247)	2/42	0.236722	0.412793	0	0	2.22312	3.20323	B3GNT5;A4GALT
regulation of ion transmembrane transporter activity (GO:0032412)	2/42	0.236722	0.412793	0	0	2.22312	3.20323	PPIF;SCN4B
ceramide metabolic process (GO:0006672)	2/42	0.236722	0.412793	0	0	2.22312	3.20323	FUT5;FUT3
response to ionizing radiation (GO:0010212)	3/77	0.241135	0.420162	0	0	1.8035	2.56529	CDKN1A;GADD45A;H2AFX
protein homooligomerization (GO:0051260)	6/190	0.243	0.423083	0	0	1.4524	2.0547	MPP2;ACTN2;GPX3;DPYSL3;LY6G6C;CLDN1
intrinsic apoptotic signaling pathway by p53 class mediator (GO:0072332)	2/43	0.244915	0.423451	0	0	2.16879	3.05114	DDIT4;PMAIP1
response to hydrogen peroxide (GO:0042542)	2/43	0.244915	0.423451	0	0	2.16879	3.05114	PPIF;TNFAIP3
digestive tract development (GO:0048565)	2/43	0.244915	0.423451	0	0	2.16879	3.05114	EDNRB;SMO
regulation of multicellular organismal development (GO:2000026)	2/43	0.244915	0.423451	0	0	2.16879	3.05114	IL10;SMAD7
modulation by virus of host process (GO:0019054)	1/13	0.251695	0.423451	0	0	3.70208	5.10716	ZC3H12A
response to iron ion (GO:0010039)	1/13	0.251695	0.423451	0	0	3.70208	5.10716	HIF1A
signal transduction involved in DNA damage checkpoint (GO:0072422)	1/13	0.251695	0.423451	0	0	3.70208	5.10716	CHEK1
regulation of granulocyte chemotaxis (GO:0071622)	1/13	0.251695	0.423451	0	0	3.70208	5.10716	THBS1
regulation of plasma membrane bounded cell projection organization (GO:0120035)	1/13	0.251695	0.423451	0	0	3.70208	5.10716	NCS1
positive regulation of sodium ion transport (GO:0010765)	1/13	0.251695	0.423451	0	0	3.70208	5.10716	SCN4B
positive regulation of cellular carbohydrate metabolic process (GO:0010676)	1/13	0.251695	0.423451	0	0	3.70208	5.10716	PMAIP1
very long-chain fatty acid biosynthetic process (GO:0042761)	1/13	0.251695	0.423451	0	0	3.70208	5.10716	ELOVL4
muscle cell development (GO:0055001)	1/13	0.251695	0.423451	0	0	3.70208	5.10716	HES1
negative regulation of epidermal growth factor-activated receptor activity (GO:0007175)	1/13	0.251695	0.423451	0	0	3.70208	5.10716	GPRC5A
regulation of biomineral tissue development (GO:0070167)	1/13	0.251695	0.423451	0	0	3.70208	5.10716	DDR2
regulation of macromolecule biosynthetic process (GO:0010556)	1/13	0.251695	0.423451	0	0	3.70208	5.10716	PRG2
regulation of production of miRNAs involved in gene silencing by miRNA (GO:1903798)	1/13	0.251695	0.423451	0	0	3.70208	5.10716	ZC3H12A
regulation of axon guidance (GO:1902667)	1/13	0.251695	0.423451	0	0	3.70208	5.10716	VEGFA
regulation of granulocyte macrophage colony-stimulating factor production (GO:0032645)	1/13	0.251695	0.423451	0	0	3.70208	5.10716	IL1B
pathway-restricted SMAD protein phosphorylation (GO:0060389)	1/13	0.251695	0.423451	0	0	3.70208	5.10716	SMAD7
response to UV-B (GO:0010224)	1/13	0.251695	0.423451	0	0	3.70208	5.10716	CDKN1A
phospholipase C-activating dopamine receptor signaling pathway (GO:0060158)	1/13	0.251695	0.423451	0	0	3.70208	5.10716	GNA15
leukocyte differentiation (GO:0002521)	1/13	0.251695	0.423451	0	0	3.70208	5.10716	RELB
toll-like receptor 9 signaling pathway (GO:0034162)	1/13	0.251695	0.423451	0	0	3.70208	5.10716	IRAK2
regulation of execution phase of apoptosis (GO:1900117)	1/13	0.251695	0.423451	0	0	3.70208	5.10716	ZC3H12A
neuron fate commitment (GO:0048663)	1/13	0.251695	0.423451	0	0	3.70208	5.10716	DLL4
sensory perception of taste (GO:0050909)	1/13	0.251695	0.423451	0	0	3.70208	5.10716	GNAT1
establishment of chromosome localization (GO:0051303)	1/13	0.251695	0.423451	0	0	3.70208	5.10716	GEM
negative regulation of reactive oxygen species biosynthetic process (GO:1903427)	1/13	0.251695	0.423451	0	0	3.70208	5.10716	ZC3H12A
prostanoid biosynthetic process (GO:0046457)	1/13	0.251695	0.423451	0	0	3.70208	5.10716	PTGES
semaphorin-plexin signaling pathway involved in neuron projection guidance (GO:1902285)	1/13	0.251695	0.423451	0	0	3.70208	5.10716	SEMA3F
regulation of T cell cytokine production (GO:0002724)	1/13	0.251695	0.423451	0	0	3.70208	5.10716	SMAD7
regulation of retinoic acid receptor signaling pathway (GO:0048385)	1/13	0.251695	0.423451	0	0	3.70208	5.10716	DHRS3
positive regulation of interleukin-17 production (GO:0032740)	1/13	0.251695	0.423451	0	0	3.70208	5.10716	IL2
regulation of fatty acid oxidation (GO:0046320)	1/13	0.251695	0.423451	0	0	3.70208	5.10716	NR4A3
glomerular visceral epithelial cell differentiation (GO:0072112)	1/13	0.251695	0.423451	0	0	3.70208	5.10716	JAG1
negative regulation of cartilage development (GO:0061037)	1/13	0.251695	0.423451	0	0	3.70208	5.10716	WNT11
negative regulation of ubiquitin-protein transferase activity (GO:0051444)	1/13	0.251695	0.423451	0	0	3.70208	5.10716	SMAD7
regulation of leukocyte migration (GO:0002685)	1/13	0.251695	0.423451	0	0	3.70208	5.10716	VEGFA
negative regulation of chemokine production (GO:0032682)	1/13	0.251695	0.423451	0	0	3.70208	5.10716	IL10
amyloid precursor protein metabolic process (GO:0042982)	1/13	0.251695	0.423451	0	0	3.70208	5.10716	ACHE
endothelial cell differentiation (GO:0045446)	1/13	0.251695	0.423451	0	0	3.70208	5.10716	JAG1
response to fatty acid (GO:0070542)	1/13	0.251695	0.423451	0	0	3.70208	5.10716	FFAR1
negative regulation of interleukin-10 production (GO:0032693)	1/13	0.251695	0.423451	0	0	3.70208	5.10716	TNFRSF21
regulation of synaptic vesicle transport (GO:1902803)	1/13	0.251695	0.423451	0	0	3.70208	5.10716	SYN1
regulation of focal adhesion assembly (GO:0051893)	2/44	0.253119	0.423626	0	0	2.11704	2.90859	THBS1;VEGFA
regulation of dendrite morphogenesis (GO:0048814)	2/44	0.253119	0.423626	0	0	2.11704	2.90859	SDC2;LZTS3
negative regulation of type I interferon production (GO:0032480)	2/44	0.253119	0.423626	0	0	2.11704	2.90859	TNFAIP3;RELB
positive regulation of transport (GO:0051050)	2/44	0.253119	0.423626	0	0	2.11704	2.90859	NR4A3;SYNGR3
carboxylic acid biosynthetic process (GO:0046394)	2/44	0.253119	0.423626	0	0	2.11704	2.90859	HAS1;IL1B
negative regulation of immune response (GO:0050777)	2/44	0.253119	0.423626	0	0	2.11704	2.90859	TNFAIP3;SAMSN1
positive regulation of actin filament bundle assembly (GO:0032233)	2/44	0.253119	0.423626	0	0	2.11704	2.90859	WNT11;RGCC
ERBB signaling pathway (GO:0038127)	3/80	0.258901	0.432014	0	0	1.73297	2.34177	PIK3CA;EREG;HBEGF
regulation of hydrolase activity (GO:0051336)	3/80	0.258901	0.432014	0	0	1.73297	2.34177	NTRK2;ARHGAP8;PRR5-ARHGAP8
regulation of protein serine/threonine kinase activity (GO:0071900)	3/80	0.258901	0.432014	0	0	1.73297	2.34177	CDKN1A;SERTAD1;GADD45A
negative regulation of defense response (GO:0031348)	3/80	0.258901	0.432014	0	0	1.73297	2.34177	IL10;TNFAIP3;METRNL
regulation of neuron projection development (GO:0010975)	4/119	0.268024	0.437149	0	0	1.54763	2.03773	NTRK2;DPYSL3;WNT5A;NCS1
positive regulation of cell adhesion mediated by integrin (GO:0033630)	1/14	0.268206	0.437149	0	0	3.41713	4.49695	FOXC2
myeloid dendritic cell activation (GO:0001773)	1/14	0.268206	0.437149	0	0	3.41713	4.49695	DCSTAMP
stem cell development (GO:0048864)	1/14	0.268206	0.437149	0	0	3.41713	4.49695	KBTBD8
gliogenesis (GO:0042063)	1/14	0.268206	0.437149	0	0	3.41713	4.49695	GCM1
establishment or maintenance of actin cytoskeleton polarity (GO:0030950)	1/14	0.268206	0.437149	0	0	3.41713	4.49695	RND1
positive regulation of response to cytokine stimulus (GO:0060760)	1/14	0.268206	0.437149	0	0	3.41713	4.49695	WNT5A
neurotransmitter biosynthetic process (GO:0042136)	1/14	0.268206	0.437149	0	0	3.41713	4.49695	ACHE
negative regulation of interleukin-1 beta production (GO:0032691)	1/14	0.268206	0.437149	0	0	3.41713	4.49695	ZC3H12A
negative regulation of Rho protein signal transduction (GO:0035024)	1/14	0.268206	0.437149	0	0	3.41713	4.49695	MET
detection of chemical stimulus involved in sensory perception of smell (GO:0050911)	1/14	0.268206	0.437149	0	0	3.41713	4.49695	OR7D2
regulation of monocyte differentiation (GO:0045655)	1/14	0.268206	0.437149	0	0	3.41713	4.49695	DCSTAMP
negative regulation of focal adhesion assembly (GO:0051895)	1/14	0.268206	0.437149	0	0	3.41713	4.49695	THBS1
pyrimidine-containing compound catabolic process (GO:0072529)	1/14	0.268206	0.437149	0	0	3.41713	4.49695	NT5C1A
thymus development (GO:0048538)	1/14	0.268206	0.437149	0	0	3.41713	4.49695	HES1
regulation of defense response to virus (GO:0050688)	1/14	0.268206	0.437149	0	0	3.41713	4.49695	TNFAIP3
hydrogen peroxide catabolic process (GO:0042744)	1/14	0.268206	0.437149	0	0	3.41713	4.49695	GPX3
regulation of neural precursor cell proliferation (GO:2000177)	1/14	0.268206	0.437149	0	0	3.41713	4.49695	DLL4
cell migration involved in sprouting angiogenesis (GO:0002042)	1/14	0.268206	0.437149	0	0	3.41713	4.49695	VEGFA
regulation of cyclin-dependent protein serine/threonine kinase activity involved in G1/S transition of mitotic cell cycle (GO:0031657)	1/14	0.268206	0.437149	0	0	3.41713	4.49695	RGCC
regulation of ventricular cardiac muscle cell membrane repolarization (GO:0060307)	1/14	0.268206	0.437149	0	0	3.41713	4.49695	SCN4B
adaptive immune response based on somatic recombination of immune receptors built from immunoglobulin superfamily domains (GO:0002460)	1/14	0.268206	0.437149	0	0	3.41713	4.49695	JAG1
negative regulation of smooth muscle cell migration (GO:0014912)	1/14	0.268206	0.437149	0	0	3.41713	4.49695	SERPINE1
purine nucleotide catabolic process (GO:0006195)	1/14	0.268206	0.437149	0	0	3.41713	4.49695	NT5C1A
positive regulation of purine nucleotide metabolic process (GO:1900544)	1/14	0.268206	0.437149	0	0	3.41713	4.49695	WNT5A
positive regulation of heart rate (GO:0010460)	1/14	0.268206	0.437149	0	0	3.41713	4.49695	PDE4D
positive regulation of muscle hypertrophy (GO:0014742)	1/14	0.268206	0.437149	0	0	3.41713	4.49695	NR4A3
regulation of interferon-gamma biosynthetic process (GO:0045072)	1/14	0.268206	0.437149	0	0	3.41713	4.49695	INHBA
positive regulation of transporter activity (GO:0032411)	1/14	0.268206	0.437149	0	0	3.41713	4.49695	SYNGR3
regulation of mRNA catabolic process (GO:0061013)	1/14	0.268206	0.437149	0	0	3.41713	4.49695	ZC3H12A
regulation of adaptive immune response (GO:0002819)	1/14	0.268206	0.437149	0	0	3.41713	4.49695	SAMSN1
purine-containing compound catabolic process (GO:0072523)	1/14	0.268206	0.437149	0	0	3.41713	4.49695	NT5C1A
cellular response to ionizing radiation (GO:0071479)	2/46	0.269541	0.437737	0	0	2.0206	2.64908	CDKN1A;GADD45A
interleukin-12-mediated signaling pathway (GO:0035722)	2/46	0.269541	0.437737	0	0	2.0206	2.64908	IL10;SERPINB2
pyruvate metabolic process (GO:0006090)	2/46	0.269541	0.437737	0	0	2.0206	2.64908	SDS;HK2
cellular response to interleukin-12 (GO:0071349)	2/46	0.269541	0.437737	0	0	2.0206	2.64908	IL10;SERPINB2
negative regulation of autophagy (GO:0010507)	2/46	0.269541	0.437737	0	0	2.0206	2.64908	PIK3CA;MET
regulation of anatomical structure morphogenesis (GO:0022603)	3/82	0.27084	0.438577	0	0	1.68892	2.20611	HEY1;VASH2;TNFAIP3
negative regulation of NF-kappaB transcription factor activity (GO:0032088)	3/82	0.27084	0.438577	0	0	1.68892	2.20611	IRAK2;ZC3H12A;TNFAIP3
positive regulation of transmembrane receptor protein serine/threonine kinase signaling pathway (GO:0090100)	3/82	0.27084	0.438577	0	0	1.68892	2.20611	GDF15;INHBA;THBS1
negative regulation of binding (GO:0051100)	3/82	0.27084	0.438577	0	0	1.68892	2.20611	SMO;ID1;ID3
macromolecular complex assembly (GO:0065003)	4/120	0.272909	0.441609	0	0	1.53421	1.99235	MATN1;TCAP;HES1;DMD
positive regulation of protein ubiquitination (GO:0031398)	3/83	0.276832	0.442284	0	0	1.66772	2.14193	RIPK2;SMURF1;SMAD7
negative regulation of endopeptidase activity (GO:0010951)	3/83	0.276832	0.442284	0	0	1.66772	2.14193	SERPINB2;SPOCK2;SERPINE1
negative regulation of cellular biosynthetic process (GO:0031327)	2/47	0.277751	0.442284	0	0	1.9756	2.5308	ZC3H12A;SNAI1
positive regulation of tumor necrosis factor production (GO:0032760)	2/47	0.277751	0.442284	0	0	1.9756	2.5308	WNT5A;THBS1
regulation of organelle assembly (GO:1902115)	2/47	0.277751	0.442284	0	0	1.9756	2.5308	PLK2;RAB33A
positive regulation of pathway-restricted SMAD protein phosphorylation (GO:0010862)	2/47	0.277751	0.442284	0	0	1.9756	2.5308	GDF15;INHBA
Golgi organization (GO:0007030)	4/121	0.277809	0.442284	0	0	1.52102	1.94815	PLK3;GOLGA8CP;RAB30;PI4K2A
positive regulation of peptidyl-lysine acetylation (GO:2000758)	1/15	0.284353	0.442284	0	0	3.17289	3.99003	IL1B
NAD biosynthesis via nicotinamide riboside salvage pathway (GO:0034356)	1/15	0.284353	0.442284	0	0	3.17289	3.99003	NAMPT
regulation of mast cell degranulation (GO:0043304)	1/15	0.284353	0.442284	0	0	3.17289	3.99003	GAB2
retinoic acid metabolic process (GO:0042573)	1/15	0.284353	0.442284	0	0	3.17289	3.99003	ALDH1A2
positive regulation of response to wounding (GO:1903036)	1/15	0.284353	0.442284	0	0	3.17289	3.99003	HBEGF
negative regulation of adherens junction organization (GO:1903392)	1/15	0.284353	0.442284	0	0	3.17289	3.99003	THBS1
regulation of B cell differentiation (GO:0045577)	1/15	0.284353	0.442284	0	0	3.17289	3.99003	INHBA
autonomic nervous system development (GO:0048483)	1/15	0.284353	0.442284	0	0	3.17289	3.99003	EDNRB
embryonic axis specification (GO:0000578)	1/15	0.284353	0.442284	0	0	3.17289	3.99003	SMAD6
endocardial cushion morphogenesis (GO:0003203)	1/15	0.284353	0.442284	0	0	3.17289	3.99003	HEY1
phototransduction, visible light (GO:0007603)	1/15	0.284353	0.442284	0	0	3.17289	3.99003	GNAT1
positive regulation of CREB transcription factor activity (GO:0032793)	1/15	0.284353	0.442284	0	0	3.17289	3.99003	VEGFA
L-alpha-amino acid transmembrane transport (GO:1902475)	1/15	0.284353	0.442284	0	0	3.17289	3.99003	SLC7A5
positive regulation of protein import (GO:1904591)	1/15	0.284353	0.442284	0	0	3.17289	3.99003	ZC3H12A
positive regulation of potassium ion transmembrane transport (GO:1901381)	1/15	0.284353	0.442284	0	0	3.17289	3.99003	ACTN2
positive regulation of cytokine production involved in immune response (GO:0002720)	1/15	0.284353	0.442284	0	0	3.17289	3.99003	WNT5A
regulation of centriole replication (GO:0046599)	1/15	0.284353	0.442284	0	0	3.17289	3.99003	PLK2
presynapse assembly (GO:0099054)	1/15	0.284353	0.442284	0	0	3.17289	3.99003	WNT5A
negative regulation of interleukin-2 production (GO:0032703)	1/15	0.284353	0.442284	0	0	3.17289	3.99003	TNFAIP3
mesenchyme morphogenesis (GO:0072132)	1/15	0.284353	0.442284	0	0	3.17289	3.99003	HEY1
pyrimidine nucleoside metabolic process (GO:0006213)	1/15	0.284353	0.442284	0	0	3.17289	3.99003	NT5C1A
negative regulation of release of cytochrome c from mitochondria (GO:0090201)	1/15	0.284353	0.442284	0	0	3.17289	3.99003	PPIF
response to cholesterol (GO:0070723)	1/15	0.284353	0.442284	0	0	3.17289	3.99003	SMO
neural crest cell differentiation (GO:0014033)	1/15	0.284353	0.442284	0	0	3.17289	3.99003	KBTBD8
ganglioside metabolic process (GO:0001573)	1/15	0.284353	0.442284	0	0	3.17289	3.99003	NEU4
regulation of exit from mitosis (GO:0007096)	1/15	0.284353	0.442284	0	0	3.17289	3.99003	RGCC
mesenchymal cell development (GO:0014031)	1/15	0.284353	0.442284	0	0	3.17289	3.99003	KBTBD8
negative regulation of muscle cell differentiation (GO:0051148)	1/15	0.284353	0.442284	0	0	3.17289	3.99003	EREG
vasculature development (GO:0001944)	1/15	0.284353	0.442284	0	0	3.17289	3.99003	PIK3CA
regulation of mitochondrial translation (GO:0070129)	1/15	0.284353	0.442284	0	0	3.17289	3.99003	MPV17L2
regulation of macrophage chemotaxis (GO:0010758)	1/15	0.284353	0.442284	0	0	3.17289	3.99003	THBS1
negative regulation of signal transduction by p53 class mediator (GO:1901797)	1/15	0.284353	0.442284	0	0	3.17289	3.99003	SNAI1
amide transport (GO:0042886)	1/15	0.284353	0.442284	0	0	3.17289	3.99003	SLC38A3
body fluid secretion (GO:0007589)	1/15	0.284353	0.442284	0	0	3.17289	3.99003	VEGFA
negative regulation of platelet activation (GO:0010544)	1/15	0.284353	0.442284	0	0	3.17289	3.99003	THBD
positive regulation of collagen metabolic process (GO:0010714)	1/15	0.284353	0.442284	0	0	3.17289	3.99003	RGCC
positive regulation of NF-kappaB import into nucleus (GO:0042346)	1/15	0.284353	0.442284	0	0	3.17289	3.99003	IL1B
negative regulation of RNA metabolic process (GO:0051253)	1/15	0.284353	0.442284	0	0	3.17289	3.99003	ZC3H12A
monovalent inorganic anion homeostasis (GO:0055083)	1/15	0.284353	0.442284	0	0	3.17289	3.99003	FGFR4
positive regulation of syncytium formation by plasma membrane fusion (GO:0060143)	1/15	0.284353	0.442284	0	0	3.17289	3.99003	DCSTAMP
protein O-linked fucosylation (GO:0036066)	1/15	0.284353	0.442284	0	0	3.17289	3.99003	THBS1
JAK-STAT cascade involved in growth hormone signaling pathway (GO:0060397)	1/15	0.284353	0.442284	0	0	3.17289	3.99003	GH1
positive regulation of collagen biosynthetic process (GO:0032967)	1/15	0.284353	0.442284	0	0	3.17289	3.99003	RGCC
positive regulation of potassium ion transport (GO:0043268)	1/15	0.284353	0.442284	0	0	3.17289	3.99003	ACTN2
positive regulation of protein export from nucleus (GO:0046827)	1/15	0.284353	0.442284	0	0	3.17289	3.99003	IL1B
negative regulation of anoikis (GO:2000811)	1/15	0.284353	0.442284	0	0	3.17289	3.99003	PIK3CA
endoderm development (GO:0007492)	1/15	0.284353	0.442284	0	0	3.17289	3.99003	DUSP4
regulation of cell junction assembly (GO:1901888)	1/15	0.284353	0.442284	0	0	3.17289	3.99003	SNAI1
regulation of cartilage development (GO:0061035)	1/15	0.284353	0.442284	0	0	3.17289	3.99003	WNT11
regulation of cell cycle arrest (GO:0071156)	2/48	0.285955	0.443546	0	0	1.93255	2.41941	MLXIPL;RGCC
regulation of epithelial cell migration (GO:0010632)	2/48	0.285955	0.443546	0	0	1.93255	2.41941	DUSP10;HIF1A
glycoprotein metabolic process (GO:0009100)	2/48	0.285955	0.443546	0	0	1.93255	2.41941	NEU4;HIF1A
intrinsic apoptotic signaling pathway in response to DNA damage (GO:0008630)	2/48	0.285955	0.443546	0	0	1.93255	2.41941	DDIT4;HIC1
positive regulation of I-kappaB kinase/NF-kappaB signaling (GO:0043123)	5/163	0.291224	0.451408	0	0	1.40816	1.73719	IL1A;RIPK2;PLK2;IL1B;ROR1
platelet degranulation (GO:0002576)	4/124	0.29259	0.453212	0	0	1.48276	1.82229	ACTN2;SERPINE1;THBS1;VEGFA
regulation of megakaryocyte differentiation (GO:0045652)	2/49	0.294149	0.454876	0	0	1.89134	2.31437	NR4A3;THBS1
regulation of release of sequestered calcium ion into cytosol (GO:0051279)	2/49	0.294149	0.454876	0	0	1.89134	2.31437	PDE4D;DMD
G-protein coupled receptor signaling pathway, coupled to cyclic nucleotide second messenger (GO:0007187)	4/125	0.297541	0.454876	0	0	1.47043	1.78246	GNA15;GNAT1;GPR84;ADRA2B
neural tube development (GO:0021915)	1/16	0.300145	0.454876	0	0	2.96121	3.56379	ALDH1A2
lipopolysaccharide-mediated signaling pathway (GO:0031663)	1/16	0.300145	0.454876	0	0	2.96121	3.56379	IL1B
dendritic cell chemotaxis (GO:0002407)	1/16	0.300145	0.454876	0	0	2.96121	3.56379	CXCR4
glucose transmembrane transport (GO:1904659)	1/16	0.300145	0.454876	0	0	2.96121	3.56379	SLC2A3
regulation of membrane depolarization (GO:0003254)	1/16	0.300145	0.454876	0	0	2.96121	3.56379	SMAD7
regulation of toll-like receptor 4 signaling pathway (GO:0034143)	1/16	0.300145	0.454876	0	0	2.96121	3.56379	TNFAIP3
negative regulation of response to wounding (GO:1903035)	1/16	0.300145	0.454876	0	0	2.96121	3.56379	SERPINE1
cytoplasmic sequestering of transcription factor (GO:0042994)	1/16	0.300145	0.454876	0	0	2.96121	3.56379	IL10
sympathetic nervous system development (GO:0048485)	1/16	0.300145	0.454876	0	0	2.96121	3.56379	SEMA3F
negative regulation of striated muscle cell differentiation (GO:0051154)	1/16	0.300145	0.454876	0	0	2.96121	3.56379	FZD7
negative regulation of steroid biosynthetic process (GO:0010894)	1/16	0.300145	0.454876	0	0	2.96121	3.56379	SNAI1
regulation of bicellular tight junction assembly (GO:2000810)	1/16	0.300145	0.454876	0	0	2.96121	3.56379	SNAI1
extracellular matrix assembly (GO:0085029)	1/16	0.300145	0.454876	0	0	2.96121	3.56379	HAS1
positive regulation of cardiac muscle hypertrophy (GO:0010613)	1/16	0.300145	0.454876	0	0	2.96121	3.56379	NR4A3
neuron apoptotic process (GO:0051402)	1/16	0.300145	0.454876	0	0	2.96121	3.56379	TNFRSF21
negative regulation of DNA replication (GO:0008156)	1/16	0.300145	0.454876	0	0	2.96121	3.56379	TSPYL2
positive regulation of cyclic nucleotide metabolic process (GO:0030801)	1/16	0.300145	0.454876	0	0	2.96121	3.56379	WNT5A
genitalia development (GO:0048806)	1/16	0.300145	0.454876	0	0	2.96121	3.56379	WNT5A
positive regulation of nitric-oxide synthase activity (GO:0051000)	1/16	0.300145	0.454876	0	0	2.96121	3.56379	HIF1A
regulation of protein homodimerization activity (GO:0043496)	1/16	0.300145	0.454876	0	0	2.96121	3.56379	TRAF4
G-protein coupled acetylcholine receptor signaling pathway (GO:0007213)	1/16	0.300145	0.454876	0	0	2.96121	3.56379	GNA15
embryonic heart tube development (GO:0035050)	1/16	0.300145	0.454876	0	0	2.96121	3.56379	HES1
detection of visible light (GO:0009584)	1/16	0.300145	0.454876	0	0	2.96121	3.56379	GNAT1
myoblast differentiation (GO:0045445)	1/16	0.300145	0.454876	0	0	2.96121	3.56379	JAG1
positive regulation of positive chemotaxis (GO:0050927)	1/16	0.300145	0.454876	0	0	2.96121	3.56379	VEGFA
mesenchyme development (GO:0060485)	1/16	0.300145	0.454876	0	0	2.96121	3.56379	WNT11
[truncated: 767 more rows]

## Sheet: C
Table S3_GO Biological Process_LUAD PEMC vs LUAD PBMC_up genes
[truncated: 4,057 more rows]

[truncated: 1 more sheets: D]
