# Supplementary material for: Deconvolution of malignant pleural effusions immune landscape unravels a novel macrophage signature associated with worse clinical outcome in lung adenocarcinoma patients
Source: HighWire-hosted journal article supplement (doi:10.1136/jitc-2021-004239), 2022-05-01
Supplement: jitc-2021-004239supp008_data_supplement.xlsx [file jitc-2021-004239supp008_data_supplement.xlsx]

## Sheet: A
Table S4_CIBERSORTx_Results_absolute scores
Mixture	B cells naive	B cells memory	Plasma cells	T cells CD8	T cells CD4 naive	T cells CD4 memory resting	T cells CD4 memory activated	T cells follicular helper	T cells regulatory (Tregs)	T cells gamma delta	NK cells resting	NK cells activated	Monocytes	Macrophages M0	Macrophages M1	Macrophages M2	Dendritic cells resting	Dendritic cells activated	Mast cells resting	Mast cells activated	Eosinophils	Neutrophils	P-value	Correlation	RMSE	Absolute score (sig.score)
PUC14_PBMC	0	0.150375	0.0022068	1.04042	0.677905	0.932736	0.22484	0	0	0	0.454252	0.093932	2.40595	0.0163423	0	0	0	0.00604866	0.0187618	0	0	0	0	0.923576	0.560843	6.02377
T844_PBMC	0.0560167	0.21968	0	0.858054	0.41391	0.961328	0.228595	0	0	0	0.549612	0.189218	1.51194	0	0	0	0	0.0108055	0	0.0807373	0.000749386	0	0	0.908908	0.57655	5.08065
HD5	0.148806	0	0.00907373	0.511224	0	1.08542	0.129991	0	0	0	0.284842	0	0.761222	0.0153667	0	0	0	0.00854488	0	0.220925	0.00941154	0	0	0.785591	0.684571	3.18483
PUC14_PEMC	0.00635866	0	0.0729613	0.432928	0.0684941	0.56642	0.00416788	0	0	0	0	0.116589	1.03927	0	0.158793	0.991618	0	0	0	0.430707	0.0162461	0.021226	0	0.721325	0.74283	3.92578
SA03_PEMC	0	0.0475638	0.0407454	0.0515235	0	0.340137	0	0	0	0	0.0145406	0.0617047	1.14267	0	0	1.02504	0	0.0526622	0	0.077532	0.192404	0	0	0.739779	0.71174	3.04652
T469_PBMC	0	0.142344	0.00380583	0.40367	0.522647	0.757231	0.159751	0	0	0	0.389663	0	0.936693	0	0	0	0	0.00416561	0	0.012351	0	0	0	0.851189	0.62735	3.33232
T626_PBMC	0.0262157	0.14521	0.00154719	0.252683	0.300093	1.2114	0	0	0	0	0.478158	0.0474925	2.44615	0	0	0	0	0.0129413	0	0.185554	0.00127167	0	0	0.940066	0.543545	5.10872
T844_PEMC	0	0.0117339	0.0153785	0.255143	0	1.10184	0	0	0	0.0384895	0	0.124225	2.26618	0	0	0.672388	0.0773231	0.0225939	0	0.694856	0.0914929	0	0	0.829305	0.651437	5.37164
HD7	0.153721	0	0.00478521	0.615969	0	0.996018	0.0877652	0	0	0	0.208899	0	0.820465	0.00829049	0	0	0	0.00858585	0	0.194604	0.0106436	0	0	0.816275	0.660177	3.10975
SA03_PBMC	0	0.0863576	0	0.195982	0.365845	0.660174	0	0	0	0	0.652341	0	3.1716	0.0543963	0	0	0	0.0221319	0	0	0	0	0	0.94978	0.487009	5.20883
HD6	0.193685	0	0.00677354	0.496876	0	1.08143	0.154432	0	0	0	0.292924	0	0.637285	0	0	0	0	0.0118062	0	0.289872	0.00564784	0	0	0.775219	0.692272	3.17073
T626_PEMC	0.0488129	0.033084	0.0154649	0.140641	0.112659	0.951017	0	0	0	0	0	0.216339	1.90436	0.0345285	0.00280802	0.141511	0.0123437	0.0185751	0	0.290889	0.0446494	0	0	0.829141	0.644057	3.96769
T469_PEMC	0.0448626	0	0.0534668	0.287602	0.512378	1.01076	0	0	0	0.0957774	0	0.159456	1.37858	0	0	0.0228956	0.0158496	0.0310733	0	0.506435	0.0545922	0	0	0.834653	0.653615	4.17373
HD8	0.111562	0	0.00524168	0.574251	0	1.09202	0.080315	0	0	0	0.299582	0	0.610029	0.00306414	0	0	0	0.00913502	0	0.208595	0.0146513	0	0	0.817314	0.650602	3.00845

## Sheet: B
Table S4_CIBERSORTx_Differential Deconvolution analysis
	Immune Cell Type	mean Absolute Score			p-value
		HD PBMC	LUAD PBMC	LUAD PEMC	HD PBMC vs LUAD PBMC	LUAD PEMC vs LUAD PBMC
	B cells naive	0.151943	0.0164465	0.0200068	0.000796097	0.842435
	B cells memory	0	0.148793	0.0184763	0.00216652	0.00920824
	Plasma cells	0.00646854	0.00151196	0.0396034	0.00652421	0.0238872
	T cells CD8	0.54958	0.550162	0.233568	0.997442	0.0550019
	T cells CD4 naive	0	0.45608	0.138706	0.00233876	0.0358383
	T cells CD4 memory resting	1.06372	0.904574	0.794037	0.170466	0.436313
	T cells CD4 memory activated	0.113126	0.122637	0.000833576	0.868343	0.0758162
	T cells follicular helper	0	0	0	0	0
	T cells regulatory Tregs	0	0	0	0	0
	T cells gamma delta	0	0	0.0268534	0	0.225849
	NK cells resting	0.271562	0.504805	0.00290812	0.00397711	0.000295106
	NK cells activated	0	0.0661285	0.135663	0.13487	0.187292
	Monocytes	0.70725	2.09447	1.54621	0.023249	0.356335
	Macrophages M0	0.00668034	0.0141477	0.00690571	0.531186	0.641794
	Macrophages M1	0	0	0.0323202	0	0.364538
	Macrophages M2	0	0	0.57069	0	0.0528011
	Dendritic cells resting	0	0	0.0211033	0	0.217039
	Dendritic cells activated	0.00951798	0.0112186	0.0249809	0.625208	0.111816
	Mast cells resting	0	0.00375236	0	0.373901	0.373901
	Mast cells activated	0.228499	0.0557284	0.400084	0.00541577	0.0327643
	Eosinophils	0.0100886	0.000404211	0.0798768	0.0127536	0.0605488
	Neutrophils	0	0	0.0042452	0	0.373901
