# Supplementary material for: Deconvolution of malignant pleural effusions immune landscape unravels a novel macrophage signature associated with worse clinical outcome in lung adenocarcinoma patients
Source: HighWire-hosted journal article supplement (doi:10.1136/jitc-2021-004239), 2022-05-01
Supplement: jitc-2021-004239supp010_data_supplement.xlsx [file jitc-2021-004239supp010_data_supplement.xlsx]

## Sheet: A
Table S5_Cytokines concentration values (pg/ml)_Hu Cytokine Screening Panel #64254596
Sample	Group	IL-1b (39)	IL-ra (25)	IL-2 (38)	IL-4 (52)	IL-5 (33)	IL-6 (19)	IL-7 (74)	IL-8 (54)	IL-9 (77)	IL-10 (56)	IL-12 (p70) (75)	IL-13 (51)	IL-15 (73)	IL-17A (76)	Basic FGF (44)	Eotaxin (43)	G-CSF (57)	GM-CSF (34)	IFN-g (21)	IP-10 (48)	MCP-1 (MCAF) (53)	MIP-1a (55)	MIP-1b (18)	PDGF-BB (47)	RANTES (37)	TNF-a (36)	VEGF (45)	IL-1a (63)	IL-2Ra (13)	IL-3 (64)	IL-12 (p40) (28)	IL-16 (27)	IL-18 (42)	CTACK (72)	GRO-a (61)	HGF (62)	IFN-a2 (20)	LIF (29)	MCP-3 (26)	M-CSF (67)	MIF (35)	MIG (14)	b-NGF (46)	SCF (65)	SCGF-b (78)	SDF-1a (22)	TNF-b (30)	TRAIL (66)
BBIRE-T135	MPE LUAD	0.91	409.31	0.54	0.32	24.2	58.41	1.52	89.8	8.24	4.26	0.78	0.39	0	1.54	9.98	3.26	53.68	0.33	13.12	642.14	51.16	2.68	12.32	82.34	1.74	9.3	0	5.58	75.2	0.07	36.32	51.27	23.01	138.61	0	254.64	2.74	12.23	1.3	4.11	562.37	221.66	0	109.14	64601.7	293.78	7.54	11.49
BBIRE-T178	MPE LUAD	1.43	174.6	0.16	0.73	79.01	1585.89	2.49	209.58	26.32	9.22	0.86	0.52	0	3.46	17.51	17.58	103.3	0.69	37.11	162.66	375.97	3.88	26.67	136.92	30.93	10.08	0	6.05	70.1	0.11	65.74	44.17	5.55	129.25	0	729.36	4.77	29.4	15.49	4.61	361.09	125.79	0	69	49289.9	369.02	25.33	34.99
BBIRE-T201	MPE LUAD	0.6	124.76	0	0.3	22.53	116.66	1.52	78.69	11.57	3.37	0.74	0.59	0	1.31	11.03	3.16	34.05	0.77	22.85	153.5	51.62	1.37	12.53	82.34	15.37	6	38.91	4.87	156.17	0.02	23.8	23.28	36.14	108.34	0	155.75	2.53	11.19	1.45	5.74	478.97	118.97	0	53.04	65807.4	248.05	9.67	13.01
BBIRE-T570	MPE LUAD	1.02	273.67	0.5	0.5	69.26	1787.55	2.67	81.52	76.16	2.65	1.13	0.93	0	2.78	13.49	10.63	28.43	0.7	14.67	147.48	77.85	1.17	38.45	318.16	440.39	11.54	237.4	7.97	43.87	0.12	38.35	51.41	8.06	135.2	59.66	356.93	4.07	46.56	2.19	3.63	544.55	47.76	0	78.69	120132	230.97	71.26	29.93
BBIRE-T238	MPE LUAD	1.1	249.27	3.06	0.44	93.71	486.79	3.03	181.62	36.49	4.17	9.08	0.72	98.63	3.01	18.54	5.3	26.15	2.01	25.55	694.35	56.48	1.26	15.72	267.76	18.34	21.65	98.21	10.39	109.79	0.65	73.3	38.31	14.25	22.74	0	879.68	3.71	73.56	5.1	4.11	1124.14	444.86	3.47	30.55	163924	161.12	31.61	36.49
BBIRE-T248	MPE LUAD	0.85	185.14	0	0.4	48.68	647.36	2.11	63.2	18.04	4.88	0.82	0.45	0	1.88	8.74	4.28	20.99	1.24	34.52	213.59	303.73	1.01	11.61	215.13	29.12	8.32	74.4	5.22	75.78	0.05	29.09	67.15	14.95	35.33	0	218.71	2.94	25.26	1.64	5.85	556.72	148.25	0	59.77	94301.1	101.5	18.17	22.16
BBIRE-T306	MPE LUAD	1.14	641.51	0.16	0.64	72.39	1100.28	4.4	94.85	24.19	5.42	1.28	0.72	0	2.95	14.38	54.1	115.12	6.99	29.9	1328.35	173.17	2.04	14.67	239.02	9.94	13.76	493.44	8.21	82.91	0.2	31.18	36.04	13.02	56.09	0	172.82	3.89	40.66	12.74	5.98	400.23	72.81	0	160.67	109553	169.37	24.54	39.89
BBIRE-T469	MPE LUAD	0.91	94.39	0	0.49	79.01	1760.63	2.49	17.31	23.09	5.24	0.82	0.48	0	1.99	11.7	15.45	65.09	0.29	12.62	306.99	57.45	2.28	18.34	103.88	12.32	7.96	0	4.28	59.09	0	36.32	152.08	9.83	132.96	0	339.95	3.71	36.86	3.72	4.13	442.99	67.53	0	44	38343.2	400.66	22.29	13.94
BBIRE-T626	MPE LUAD	0.58	57.51	0	0.3	32.07	376.2	1.72	11.4	10.99	5.6	0.27	0.33	0	1.43	9.62	2.36	33.57	0.18	12.62	308.37	91.57	1.9	14.36	73.27	1.03	8.08	0	3.93	72.74	0.01	42.38	35.15	24.69	78.87	0	575.86	2.32	14.28	1.26	7.3	310.85	181.95	0	73.25	53287.8	308.4	10.95	24.11
BBIRE-T844	MPE LUAD	0.83	70.39	0	0.36	31.66	442.74	2.11	23.22	12.58	12.04	0.51	0.42	0	1.77	10.69	5.01	35.16	0.03	16.72	296.27	145.33	1.83	11.44	101.85	0.41	5.76	0	4.4	40.41	0	36.32	61.78	8.66	186.74	0	336.86	2.94	14.53	1.45	2.91	353.05	55.42	0	82.38	71178.5	436.71	11.98	13.01
BBIRE-T1104	MPE LUAD	0.85	66.78	0	0.49	40.23	747.78	3.03	13.76	17.68	4.44	1.05	0.57	0	2.16	10.8	10.17	45.29	0.37	18.71	388.18	161.22	2.33	16.15	205.97	8.28	6.37	41.61	5.34	33.86	0.04	36.32	48.44	5.99	82.35	0	279.23	3.52	24.28	1.51	4.06	484.46	98.51	0	50.33	93737	421.27	16.8	20.95
SA03	MPE LUAD	0.96	61.38	0	0.49	75.32	1393.04	2.3	60.61	23.09	5.96	1.88	0.65	0	2.1	12.13	5.3	21.67	0.54	13.51	197.8	27.65	0.78	13.54	236.92	6.91	8.38	0	6.53	64.15	0.12	52.26	76	10.46	77.22	460.62	680.01	3.61	25.26	2.7	9.38	603.86	57.68	0	70.02	101570	386.09	22.39	27.1
SA13	MPE LUAD	0.55	112.31	0	0.3	47.28	533.01	2.49	82.5	49.61	2.92	1.09	0.39	0	1.31	9.37	5.82	21.33	0.29	17.55	206.09	182.65	0.87	15.11	136.4	2.94	7.84	3.21	4.4	19.49	0.35	23.8	23.49	25.69	25.84	0	217.46	2.32	15.8	2.63	11.01	656.2	110.37	0	62.71	45755.9	104.59	40.57	15.96
SA20	MPE LUAD	1.31	88.41	1.07	0.62	90.44	1587.99	3.56	35.97	29.18	3.9	1.35	0.65	0	3.12	13.18	25.47	37.52	0.77	31.22	448.74	309.88	1.22	16.43	233.76	50.16	9.05	54.69	8.21	38.54	0.23	91.82	92.63	25.17	114.5	0	1381.16	4.94	51.94	2.04	7.32	709.66	141.8	0	28.06	114774	384.64	26.6	24.79
SA29	MPE LUAD	0.8	180.81	0	0.38	80.57	1477.82	1.72	13.11	27.13	4.26	2.06	0.39	0	1.99	10.34	2.11	23.01	0.28	43.24	62.28	368.76	0.86	15	178.32	67.56	6	157.95	5.58	96.63	0.09	28.04	31.62	31.6	19.33	0	293.82	3.52	38.29	2.38	6.68	856.75	40.31	0	77.67	63050.8	55.4	25.87	20.36
BBIRE-T135	plasma LUAD	0.49	70	0.69	0.34	13.57	0.02	0.89	3.52	26.9	1.67	0.59	0.27	0	1.54	8.61	8.59	27.29	0.18	6.32	86.82	25.47	0.75	22.16	166.63	291.57	4.84	97.59	3.93	27.07	0.12	23.8	35.21	27.63	154.35	0	154.48	2.74	10.67	0.51	6.62	247.86	160.05	0	28.51	72769.2	376.41	25.62	20.01
BBIRE-T178	plasma LUAD	0.49	86.62	0.54	0.27	10.07	2.31	1.11	16.04	67.38	1.13	0.82	0.24	9.94	2.1	16.45	15.42	35.32	0.92	6.66	34.08	25.82	1.2	39.04	146.19	1310.01	11.05	84.34	1.85	28.8	0.21	21.65	25.61	24.4	120.13	206.41	210.56	2.32	13.77	0.8	5.48	279.3	134.13	1.92	23.07	27510	243.78	58.33	18.96
BBIRE-T201	plasma LUAD	0.32	152.58	0.54	0.23	19.36	4.44	0.89	12.98	20.6	1.22	0.43	0.21	0	0.98	8.08	14.49	33.09	0.13	8.14	35.36	27.8	0.71	15.22	67.76	118.88	5.63	48.75	1.51	47.99	0	19.47	47.22	37.29	72.77	0	132.9	1.87	8.57	1.26	5.26	735.2	212.03	0	19.43	19993.4	201.31	17.19	10.98
BBIRE-T570	plasma LUAD	0.32	37.39	0.08	0.23	0	0.74	1.11	3.25	44.34	0.95	0.18	0.76	0	1.2	8.21	2.85	17.05	0.11	3.79	23.53	7.75	0.5	26.91	111.53	349.7	6.19	93.61	2.31	14.44	0	16.14	19.5	13.94	120.44	163.75	125.89	1.87	8.04	0.51	3.65	387.67	25.25	0	16.02	32783.3	310.84	36.82	16.09
BBIRE-T238	plasma LUAD	0.26	40.02	0.23	0.16	0	0.72	0.66	9.99	26.61	0.69	1.65	0.24	89.89	1.2	6.03	18.88	3.74	0.03	6.21	14.84	16.43	0.39	19.03	80.82	467.97	4.4	112.89	0.95	35.82	0	15.02	24.34	11.37	64.79	143.46	68.63	1.39	5.89	0.56	3.04	536.41	97.97	0.55	11.45	13277.3	151.47	26.21	8.49
BBIRE-T248	plasma LUAD	0.43	77	0.54	0.28	2.28	1.25	1.52	3.43	53.41	1.76	0.51	0.24	73.58	1.71	8.08	18.74	15.48	0.44	5.41	97.33	8	0.6	33.3	92.96	719.29	8.51	107.36	3.23	37.44	0.05	19.47	42.47	19.93	108.03	160.95	152.58	3.14	10.93	0.56	6.57	408.26	148.06	1.4	26.19	32458.8	229.34	50.07	16.57
BBIRE-T306	plasma LUAD	1.23	3309.78	2.03	0.61	10.51	7	4.07	15.6	128.19	3.81	1.43	0.61	0	3.91	17.69	52.86	44.21	1.23	24.23	50.62	11.1	0.98	67.47	615.65	13294.1	20.23	28.2	8.57	23.08	0.34	57.12	1087.91	58.84	169.73	250.09	737.23	5.59	19.32	1.34	10.26	12814.4	63.17	0	22.96	27502.7	239.16	117.17	24.79
BBIRE-T469	plasma LUAD	0.26	52.15	0	0.18	0	0.02	0.41	3.97	27.13	0	0	0.18	0	1.43	6.65	11.53	11.88	0	4.26	67.53	10.29	0.62	19.89	15.34	275.07	2.91	74.86	1.62	24.82	0	19.47	41.66	37.85	64.39	90.86	150.68	2.1	6.7	0.49	4.89	336.5	70.73	0	14.42	14531.5	272.6	25.13	8.76
BBIRE-T626	plasma LUAD	0.29	42.57	0.5	0.2	5.11	0.46	0.89	6.55	49.98	1.71	0	0.24	0	2.33	7.52	10.01	19.81	0.15	3.68	62.28	25.78	0.35	30.61	62.75	732.42	5.76	56.53	2.77	22.21	0.14	15.02	16.33	26.5	91.62	169.58	71.88	2.32	6.97	0.51	4.34	221.45	88.32	1.21	20.74	14341.4	198.41	47.14	22.74
BBIRE-T844	plasma LUAD	0.52	99.85	0.62	0.27	0	1.6	1.32	6.33	69.1	0.1	0.43	0.33	63.51	1.77	9.12	10.75	19.29	0.67	5.75	55.86	26.68	0.58	40.87	136.92	1762.92	9.42	74.63	2.65	21.95	0.07	19.47	280.92	23.5	116.47	270.31	99.65	2.74	9.36	0.41	5.26	1570.19	63.29	4.81	19.32	16245.6	257.13	62.08	20.42
BBIRE-T1104	plasma LUAD	0.8	276.23	1.38	0.43	0	0	3.38	14.38	118.72	2.38	1.2	0.45	0	2.61	11.48	38.01	33.09	0.74	12.51	74.58	37.62	1.49	72.62	219.32	25013.8	16.34	84.34	5.94	39.22	0.27	35.3	77.98	40.16	73.26	176.69	249.96	3.61	13.77	1.02	8.68	5050.89	166.3	0	26.36	23227.5	325.57	105.85	21.41
SA03	plasma LUAD	0.6	106.49	0	0.27	0	0.39	1.32	14.99	70.98	0.33	0	0.33	0	1.2	9.12	8.16	3.51	0	5.18	61.83	4.64	0.58	41.83	186.65	1028.86	9.05	0	3	23.08	0	19.47	55.83	46.59	140.13	69.13	142.43	1.87	9.1	0.41	18.2	223.1	32.11	0	28.85	19778	183.05	69.15	15.54
SA13	plasma LUAD	1.07	199.37	0.77	0.23	44.67	14.33	1.32	9.47	62.36	3.46	2.69	0.62	118.75	3.01	15.99	20.22	33.41	1.1	9.04	39.33	12.28	0.55	36.23	115.11	873.26	12.32	116.01	11.12	24.82	0.88	38.35	33.42	34.64	115.53	965.45	144.97	3.33	11.71	1.81	14.8	639.19	74.41	8.22	22.73	19742.1	184.25	55.04	16.57
SA20	plasma LUAD	0.55	0	0	0.27	0	0	1.92	0.71	81.13	0	0.23	0.39	0	1.65	9.62	7.66	3.51	0	3.91	72.23	3.2	0.5	49.41	164.04	1374.24	10.99	0	3	16.84	0	19.47	24.91	20.44	132.29	171.48	109.27	1.13	8.57	0.22	8.02	47.96	54.51	0	8.46	14194.5	171.25	78.84	17.53
SA29	plasma LUAD	0.43	0	0	0.36	0	0.79	2.49	1.13	93.2	0	0.66	0.51	0	2.1	9.74	11.56	14.41	0.4	7.91	38.01	6.45	0.53	48.8	316.83	1055.23	11.48	0	4.63	31.21	0	36.32	12	7.56	61.27	132.6	111.2	0.84	11.19	0.66	8.7	0	13.76	0	12.37	27881.4	130.49	83.81	21.88
HD1	plasma HD	0.56	0	0	0.23	0	0.22	2.67	0.27	75.11	1.58	3.06	1.1	0	0.86	8.87	7.48	21.33	0.29	2.97	57.33	5.31	0.42	44.06	144.39	1281.3	10.21	0	2.08	17.64	0	15.02	21.5	8.5	127.64	103.13	59.5	1.13	9.1	0.22	3.95	28.81	23.86	1.29	17.84	20281.6	201.65	70.66	14.5
HD2	plasma HD	0.52	0	1.92	0.23	0	0	1.52	0	68.05	0.06	0.01	0.33	0	1.2	8.99	6.81	2.09	0.29	3.15	56.6	5.67	0.41	39.74	54.04	760.75	15.51	0	2.77	15.33	0	75.17	20.51	31.21	112.58	14.04	73.83	1.64	8.57	0.11	6.97	72	25.59	0.13	22.5	19898.7	288.58	62.03	15.23
HD3	plasma HD	1.18	0	0	0.28	0	0	1.92	0.07	75.71	0.24	0.43	0.39	0	1.65	11.92	11.18	5.26	0	5.06	45.66	7.26	0.46	45.34	45.88	1261.44	11.48	0	3.69	14.62	0	20.56	20.51	11.15	159.87	64.05	87.1	1.39	39.71	0.07	4.11	0	35.2	0	17.73	16944.6	238.05	71.21	13.26
HD4	plasma HD	0.41	0	0	0.22	0	0	0.89	0	76.84	0	0.51	3.21	0	1.09	7.8	8.52	1.84	0	3.73	68.15	6.2	0.39	45.89	40.95	1026.99	9.48	0	1.62	14.26	0	8	20.43	7.81	122.9	OOR <	56.56	0.84	7.51	0	4.3	42.39	30.21	0	15.56	12553.5	251.82	76.41	13.63

## Sheet: B
Table S5_Plasma levels of cytokines (pg/mL) in LUAD patients and Healthy Donors (HDs)
	Cytokine	LUAD Plasma concentration (pg/mL)	HD Plasma concentration (pg/mL)	p value
	IL-5	7.038	0	0.0410461
	IL-6	2.27133	0.055	0.0431234
	IL-8	8.156	0.085	5.89133e-05
	IL-15	23.7113	0	0.0409519
	IL-17A	1.916	1.2	0.0178936
	Eotaxin	16.6487	8.4975	0.0320855
	IFN-g	7.53333	3.7275	0.0160767
	MCP-1 (MCAF)	16.6207	6.11	0.00187805
	MIP-1a	0.688667	0.42	0.00492604
	PDGF-BB	166.567	71.315	0.0489961
	VEGF	65.274	0	< 0.0001
	IL-2Ra	27.9193	15.4625	0.000102651
	IL-3	0.138667	0	0.0369934
	GRO-a	198.051	60.4067	0.0467441
	HGF	177.487	69.2475	0.0222096
	IFN-a2	2.45733	1.25	0.00305102
	MCP-3	0.738	0.1	6.45178e-05
	MIG	93.606	28.715	0.000715333
	TRAIL	17.3827	14.155	0.0286776
