# Supplementary figures and images for: Deconvolution of malignant pleural effusions immune landscape unravels a novel macrophage signature associated with worse clinical outcome in lung adenocarcinoma patients
Source: HighWire-hosted journal article supplement (doi:10.1136/jitc-2021-004239), 2022-05-01

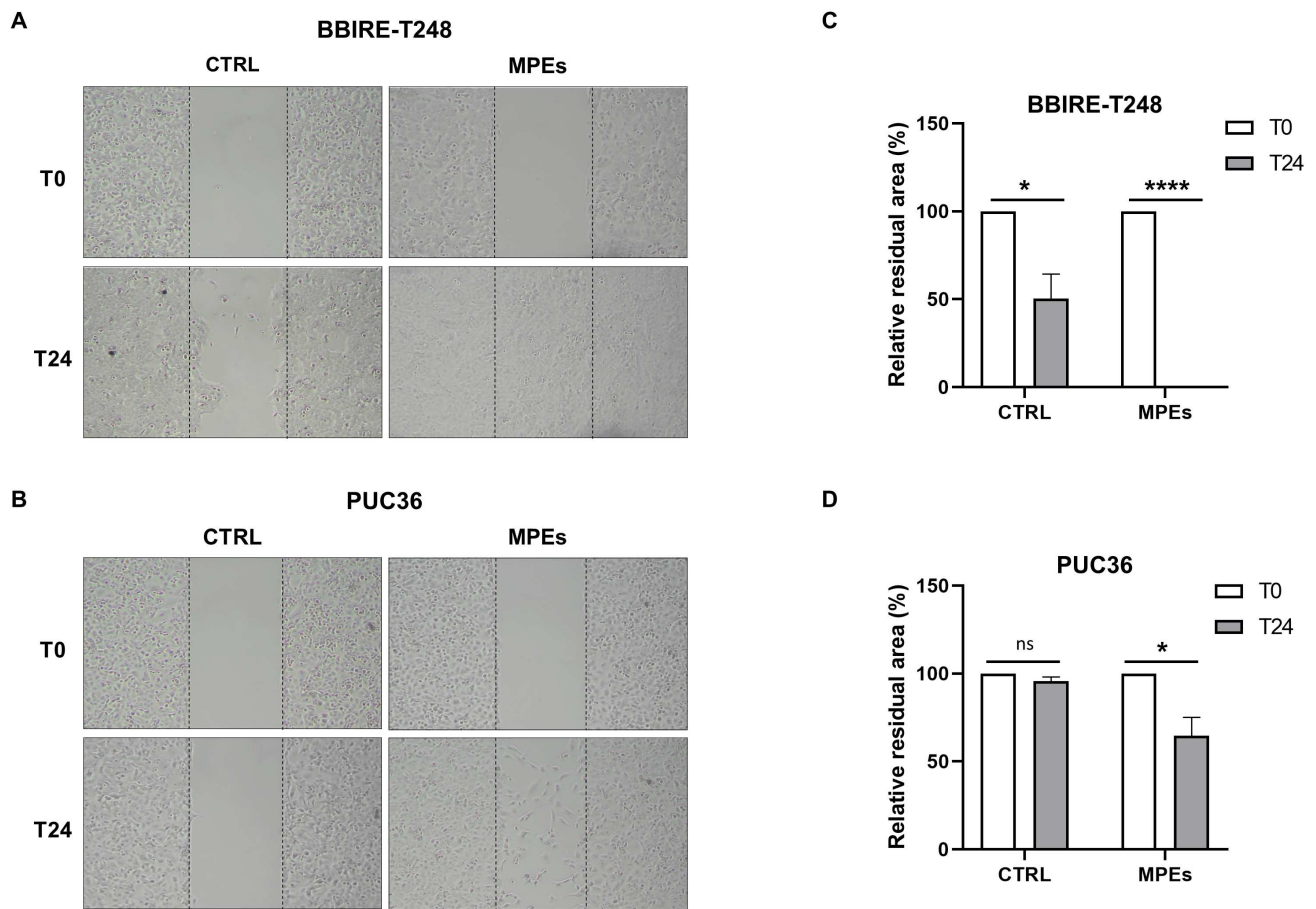

Figure S5

Supplement: jitc-2021-004239supp012_data_supplement.pdf [file jitc-2021-004239supp012_data_supplement.pdf]

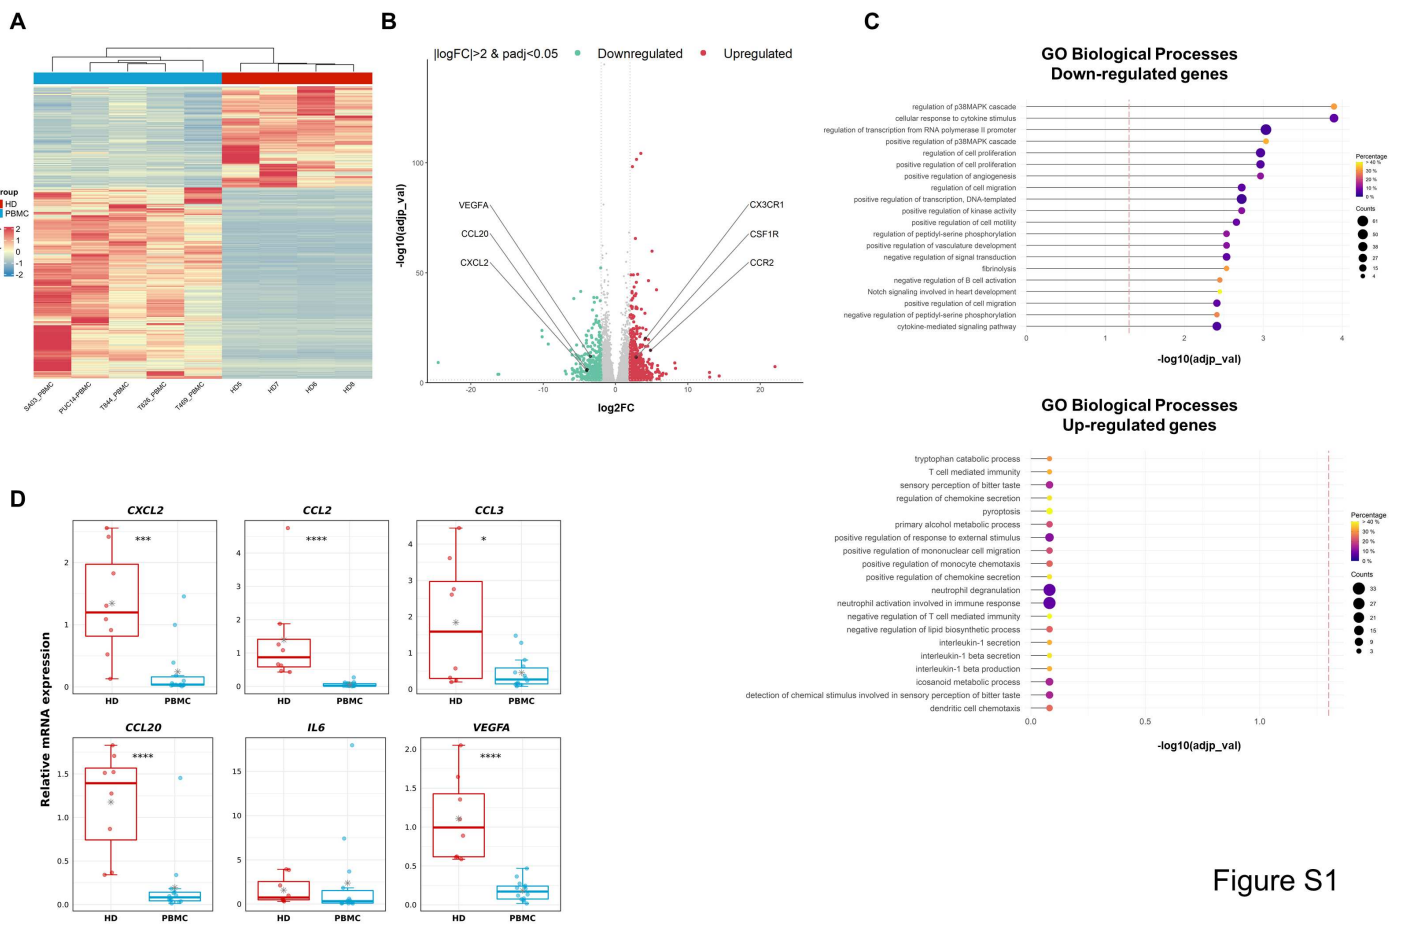

Figure S1

Supplement: jitc-2021-004239supp004_data_supplement.pdf [file jitc-2021-004239supp004_data_supplement.pdf]
